# Supplementary material for: Fundamental understanding of fluorophenol-derived dual organocatalysts for ring-opening polymerization of lactide
Source: Royal Society of Chemistry journal article supplement (doi:10.1039/d4nj04115a), 2024-12-13
Supplement: d4nj04115a1.pdf [file d4nj04115a1.pdf]

# Supporting Information

## Fundamental Understanding of Fluorophenol-derived Dual Organocatalysts for Ring-opening Polymerization of Lactide

Fengzhen Guo<sup>1</sup>, Jiawen Dai<sup>1</sup>, Shaoju Cao<sup>1</sup>, Yaling Yin<sup>1</sup>, Zhenjiang Li<sup>1,\*</sup>, Jie Sun<sup>2</sup>, Jin Huang<sup>1,\*</sup>, and

Kai Guo<sup>1</sup>

<sup>1</sup> State Key Laboratory of Materials-Oriented Chemical Engineering, College of Biotechnology and Pharmaceutical Engineering, Nanjing Tech University, 30 Puzhu Road South, Nanjing 211816, China

<sup>2</sup> College of Food Science and Light Industry, Nanjing Tech University, 30 Puzhu Road South, Nanjing 211816, China.

### Table of Contents

|                                                                          |    |
|--------------------------------------------------------------------------|----|
| <b>Materials</b> .....                                                   | 2  |
| <b>Instruments</b> .....                                                 | 2  |
| <b>Experimental Procedures</b> .....                                     | 3  |
| 1.1 Preparation of the dual catalysts .....                              | 3  |
| 1.2 General procedure for ring-opening polymerization of L-lactide ..... | 3  |
| 1.3 Preparation of the fluorophenol/DMAP dual catalysts .....            | 4  |
| 1.4 Preparation of the fluorophenol/MTBD dual catalysts .....            | 6  |
| <b>Supporting Tables</b> .....                                           | 9  |
| <b>Supporting Figures</b> .....                                          | 13 |
| <b>Computational Study</b> .....                                         | 49 |

## Materials

L-lactide (LLA, 99.5%, supplied by Jinan Steel Biomaterials Co., LTD.) was recrystallized by anhydrous toluene three times to obtain white crystal and subsequently dried under vacuum for 72 h. 3-phenylpropanol (PPA, 99%, Acros) was dried over CaH<sub>2</sub> for 48h before distillation. Anhydrous dichloromethane CH<sub>2</sub>Cl<sub>2</sub>, >99.5%, was purchased from Sinopath Chemical Reagents Co., LTD. Toluene (> 99%, water content < 0.001%, Sinopsin Chemical Reagent Co., LTD.) was stored in a flask with 3 Å molecular sieve. 4-(N,N'-dimethylamino) pyridine (DMAP), 7-Methyl-1,5,7-triazabicyclo(4.4.0)dec-5-ene (MTBD) and fluorophenols were purchased from Sinophosphoric Chemical Reagent Co., LTD.

## Instruments

<sup>1</sup>H NMR and <sup>13</sup>C NMR spectra were measured at 298 K by a Bruker Ascend TM-400 spectrometer using CDCl<sub>3</sub> as solvent. **Size Exclusion Chromatography (SEC)** was applied to determine molecular weight and dispersity of polymer at a flow rate of 0.7 ml/min, 35° C in THF flow phase, polystyrene as standard. **Matrix-assisted laser desorption ionization time-of-flight (MALDI-TOF)** mass spectrometry was performed using a Voyager-DE STR (Applied Biosystems) spectrometer equipped with a nitrogen laser (337 nm), a delay extraction, and a reflector. The MALDI-TOF mass spectra re-present averages over 100 laser shots. This instrument operated at an accelerating potential of 20 kV. Polymer (2 μL) and matrix (20 μL, dithranol) solutions in CH<sub>2</sub>Cl<sub>2</sub> (10 g·L<sup>-1</sup>) were mixed with 2 μL of a sodium iodide solution (10 g·L<sup>-1</sup> in methanol), which favors ionization. The final solution (1 μL) was deposited onto the sample target and dried in air at room temperature.

## Experimental Procedures

### 1.1 Preparation of the dual catalysts

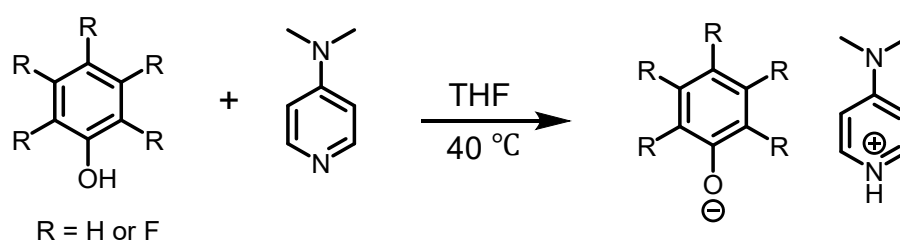

**Scheme S1.** Synthesis of fluorophenol/DMAP dual catalysts

Fluorophenol/DMAP catalysts were obtained by the reactions of fluorophenol and 4-(N,N-Dimethylamino)pyridine (DMAP). Taking *p*-fluorophenol and DMAP as an example, *p*-fluorophenol (689 mg, 6.15 mmol, 1.0 equiv.), DMAP (750 mg, 6.15 mmol, 1.0 equiv) and THF (5.0 mL) as the solvent were added into a 20 mL vial equipped with a stirrer. The mixture was stirred for 4 h at 40 °C. The solvent was removed by rotary steaming and the product was obtained by drying in vacuum for 24 hours.

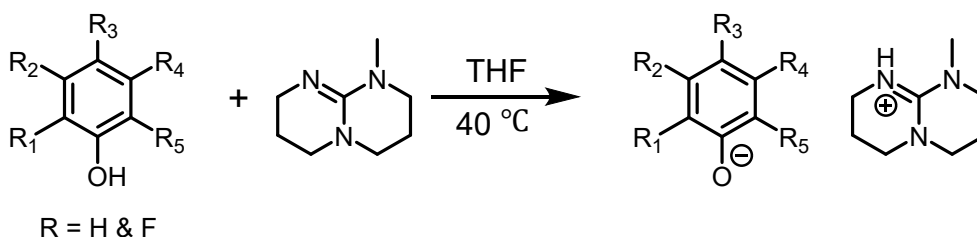

**Scheme S2.** Synthesis of fluorophenol/MTBD dual catalysts

Fluorophenol/MTBD catalysts were obtained by the reactions of fluorophenol and 7-methyl-1,5,7-triazabicyclo(4.4.0)dec-5-ene (MTBD). Taking *p*-fluorophenol and MTBD as an example, *p*-fluorophenol (689 mg, 6.15 mmol, 1.0 equiv.), MTBD (942 mg, 6.15 mmol, 1.0 equiv) and THF (5.0 mL) as the solvent were added into a 20 mL vial equipped with a stirrer. The mixture was stirred for 4 h at 40 °C. The solvent was removed by rotary steaming and the product was obtained by drying in vacuum for 24 hours.

### 1.2 General procedure for ring-opening polymerization of L-lactide

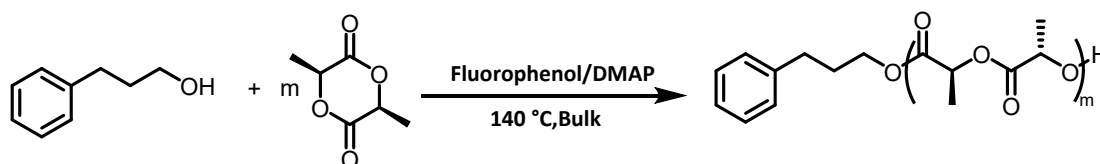

**Scheme S3.** Synthesis of polylactide catalyzed by fluorophenol/DMAP

A typical procedure for the polymerization is as follows: in an Ar-filled glove box, LLA (0.231 g, 1.6 mmol, 100 equiv) and catalyst fluorophenol/DMAP (0.016mmol, 1 equiv) were added into a dry Schlenk tube, and 3-phenylpropanol (2.18  $\mu$ L, 0.016 mmol, 1 equiv) was dripped as initiator. The mixture was stirred for 1 h at 140 °C. A portion of the polymerization mixtures and then added a small amount of dichloromethane and benzoic acid to the mixtures for determining the monomer conversion that was directly determined from the  $^1\text{H}$  NMR measurements of the polymerization mixtures. The polymer was isolated by reprecipitation in cold methanol. Yield, 85.2%;  $M_{n,\text{NMR}}$ , 12.6  $\text{kg}\cdot\text{mol}^{-1}$ ;  $M_w/M_n$ , 1.09;  $^1\text{H}$  NMR ( $\text{CDCl}_3$ )  $\delta$  (ppm), 1.58 (m,  $3\text{H} \times n$ , (-

$CH_3)_n$ , 1.97 (q, 2H,  $ArCH_2CH_2-$ ), 2.67 (t, 2H,  $ArCH_2-$ ), 4.15 (m, 2H,  $ArCH_2CH_2CH_2-$ ), 4.36 (m, 1H,  $-CH(CH_3)OH$ ), 5.10–5.23 (q,  $1H \times n - 1$ ,  $(-CH(CH_3)O-)_{n-1}$ ), 7.15–7.31 (m, 5H, aromatic).

### 1.3 Preparation of the fluorophenol/DMAP dual catalysts

#### *o*-FP/DMAP(a)

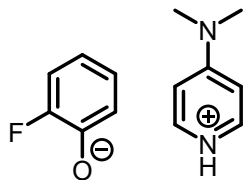

4-(N,N-Dimethylamino) pyridine *ortho*-fluorophenol (*o*-FP/DMAP) 1.35 g, yield = 94%. White crystal. <sup>1</sup>H NMR (400 MHz, CDCl<sub>3</sub>) δ 8.20 (s, 2H), 7.07 – 7.01 (m, 1H), 6.98 (s, 2H), 6.78 (s, 1H), 6.50 (s, 2H), 3.02 (s, 6H). <sup>13</sup>C NMR (101 MHz, CDCl<sub>3</sub>) δ 154.77, 153.24, 150.86, 148.75, 124.64, 119.60, 118.15, 115.95, 106.75, 39.72. <sup>19</sup>F NMR (376 MHz, CDCl<sub>3</sub>) δ -138.41.

#### *m*-FP/DMAP(b)

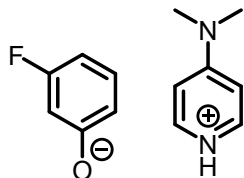

4-(N,N-Dimethylamino) pyridine *meta*-fluorophenol (*m*-FP/DMAP) 1.36 g; yield = 95%. White crystal. <sup>1</sup>H NMR (400 MHz, CDCl<sub>3</sub>) δ 8.18 (s, 2H), 7.11 (s, 1H), 6.64 (s, 1H), 6.58 (s, 1H), 6.52 (s, 3H), 3.03 (s, 6H). <sup>13</sup>C NMR (101 MHz, CDCl<sub>3</sub>) δ 162.73, 159.69, 154.92, 148.35, 130.17, 111.83, 106.88, 105.90, 103.62, 39.72. <sup>19</sup>F NMR (376 MHz, CDCl<sub>3</sub>) δ -112.78.

#### *p*-FP/DMAP (c)

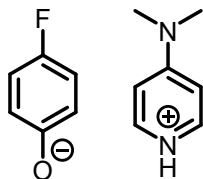

4-(N,N-Dimethylamino) pyridine *p*-fluorophenol (*p*-FP/DMAP) 1.36 g; yield = 95%. White crystal. <sup>1</sup>H NMR (400 MHz, CDCl<sub>3</sub>) δ 8.19 (s, 2H), 6.84 (d,  $J = 30.4$  Hz, 3H), 6.51 (s, 2H), 3.02 (s, 6H). <sup>13</sup>C NMR (101 MHz, CDCl<sub>3</sub>) δ 154.76, 153.83, 149.24, 116.50, 115.67, 106.10, 38.05. <sup>19</sup>F NMR (376 MHz, CDCl<sub>3</sub>) δ -126.34.

#### 2,3-FP/DMAP(d)

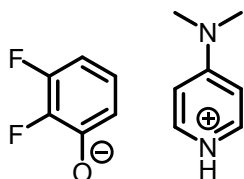

4-(N,N-Dimethylamino) pyridine 2,3-difluorophenol (2,3-FP/DMAP) 1.46 g; yield = 94%. White crystal.  $^1\text{H}$  NMR (400 MHz,  $\text{CDCl}_3$ )  $\delta$  8.18 (s, 2H), 6.83 (s, 1H), 6.74 (s, 1H), 6.58 (dddd,  $J = 10.1, 8.5, 6.8, 1.7$  Hz, 1H), 6.51 (s, 2H), 3.03 (s, 6H).  $^{13}\text{C}$  NMR (101 MHz,  $\text{CDCl}_3$ )  $\delta$  154.94, 152.93, 150.53, 148.15, 142.42, 140.04, 123.29, 113.74, 106.76, 39.22.  $^{19}\text{F}$  NMR (376 MHz,  $\text{CDCl}_3$ )  $\delta$  -138.82, -162.04.

#### 2,4-FP/DMAP (e)

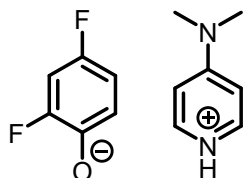

4-(N,N-Dimethylamino) pyridine 2,4-difluorophenol (2,4-FP/DMAP) 1.49 g; yield = 96%. Faint yellow crystal.  $^1\text{H}$  NMR (400 MHz,  $\text{CDCl}_3$ )  $\delta$  8.18 (s, 2H), 6.91 (s, 1H), 6.81 (s, 1H), 6.70 (s, 1H), 6.50 (s, 2H), 3.02 (s, 6H).  $^{13}\text{C}$  NMR (101 MHz,  $\text{CDCl}_3$ )  $\delta$  156.51, 154.84, 154.10, 148.51, 142.01, 118.05, 110.89, 106.77, 104.23, 39.20.  $^{19}\text{F}$  NMR (376 MHz,  $\text{CDCl}_3$ )  $\delta$  -123.24, -133.32.

#### 2,6-FP/DMAP (f)

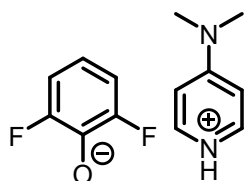

4-(N,N-Dimethylamino) pyridine 2,6-difluorophenol (2,6-FP/DMAP) 1.44 g; yield = 93%. White crystal.  $^1\text{H}$  NMR (400 MHz,  $\text{CDCl}_3$ )  $\delta$  8.20 (s, 2H), 6.84 (s, 2H), 6.65 (s, 1H), 6.51 (s, 2H), 3.03 (s, 6H).  $^{13}\text{C}$  NMR (101 MHz,  $\text{CDCl}_3$ )  $\delta$  154.96, 152.36, 147.99, 135.84, 117.00, 111.42, 106.64, 39.23.  $^{19}\text{F}$  NMR (376 MHz,  $\text{CDCl}_3$ )  $\delta$  -133.72.

#### 2,3,6-FP/DMAP(g)

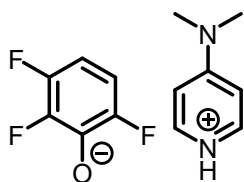

4-(N,N-Dimethylamino) pyridine 2,3,6-trifluorophenol (2,3,6-FP/DMAP) 1.54 g; yield = 93%. White crystal.  $^1\text{H}$  NMR (400 MHz,  $\text{CDCl}_3$ )  $\delta$  8.17 (s, 2H), 6.71 (s, 1H), 6.53 (s, 2H), 6.41 (s, 1H), 3.06 (s, 6H).  $^{13}\text{C}$  NMR (101 MHz,  $\text{CDCl}_3$ )  $\delta$  155.12, 154.40, 152.89, 147.73, 134.82, 132.41, 106.97, 100.22, 39.25.  $^{19}\text{F}$  NMR (376 MHz,  $\text{CDCl}_3$ )  $\delta$  -138.50, -143.47, -156.88.

#### 3,4,5-FP/DMAP (h)

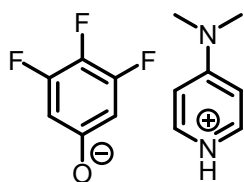

4-(N,N-Dimethylamino) pyridine 3,4,5-trifluorophenol (3,4,5-FP/DMAP) 1.58 g; yield = 95%. White crystal.  $^1\text{H}$  NMR (400 MHz,  $\text{CDCl}_3$ )  $\delta$  8.13 (s, 2H), 6.54 (s, 2H), 6.43 (s, 2H), 3.05 (s, 6H).  $^{13}\text{C}$  NMR (101 MHz,  $\text{CDCl}_3$ )  $\delta$  155.33, 152.66, 150.22, 146.70, 134.54, 106.80, 100.08, 39.15.  $^{19}\text{F}$  NMR (376 MHz,  $\text{CDCl}_3$ )  $\delta$  -135.63, -174.88.

#### 2,3,5,6-FP/DMAP (i)

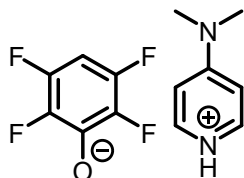

4-(N,N-Dimethylamino) pyridine 2, 3, 5, 6-tetrafluorophenol (2,3,5,6-FP/DMAP) 1.67 g; yield = 94%. White crystal.  $^1\text{H}$  NMR (400 MHz,  $\text{CDCl}_3$ )  $\delta$  8.13 (s, 2H), 6.57 (s, 2H), 6.24 (s, 1H), 3.09 (s, 6H).  $^{13}\text{C}$  NMR (101 MHz,  $\text{CDCl}_3$ )  $\delta$  155.88, 147.90, 145.51, 143.91, 143.39, 106.65, 90.53, 39.50.  $^{19}\text{F}$  NMR (376 MHz,  $\text{CDCl}_3$ )  $\delta$  -144.06, -164.19.

#### 2,3,4,5,6-FP/DMAP (j)

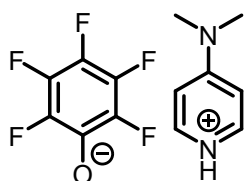

4-(N,N-Dimethylamino) pyridine pentafluorophenol (2,3,4,5,6-FP/DMAP) 1.71 g; yield = 91%. White crystal.  $^1\text{H}$  NMR (400 MHz,  $\text{CDCl}_3$ )  $\delta$  8.13 (s, 1H), 6.57 (s, 1H), 3.09 (s, 3H).  $^{13}\text{C}$  NMR (101 MHz,  $\text{CDCl}_3$ )  $\delta$  155.75, 144.69, 141.29, 139.57, 139.01, 137.13, 106.59, 39.39.  $^{19}\text{F}$  NMR (376 MHz,  $\text{CDCl}_3$ )  $\delta$  -165.09, -167.82, -178.31.

### 1.4 Preparation of the fluorophenol/MTBD dual catalysts

#### *o*-FP/MTBD(a')

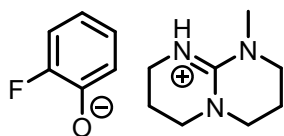

7-methyl-1,5,7-triazabicyclo(4.4.0)dec-5-ene (MTBD) *ortho*-fluorophenol (*o*-FP/MTBD) 1.47 g, yield = 90%. Yellow colorless liquid.  $^1\text{H}$  NMR (400 MHz,  $\text{CDCl}_3$ )  $\delta$  6.91 – 6.86 (m, 1H), 6.85 (d, 1H), 6.80 (td, 1.6 Hz, 1H), 6.39 (tdd, 1H), 3.34 – 3.29 (m, 2H), 3.20 – 3.12 (m, 6H), 3.05 (s, 3H), 1.92 (q, 2H), 1.85 (qd, 2H).  $^{13}\text{C}$  NMR (101 MHz,  $\text{CDCl}_3$ )  $\delta$  155.45, 153.10, 151.81, 124.47, 120.17, 115.15, 114.00, 48.34, 48.12, 47.57, 40.08, 38.20, 21.78, 21.57.  $^{19}\text{F}$  NMR (376 MHz,  $\text{CDCl}_3$ )  $\delta$  -138.15.

#### *m*-FP/MTBD(b')

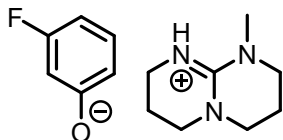

7-methyl-1,5,7-triazabicyclo(4.4.0)dec-5-ene (MTBD) *meta*-fluorophenol (*m*-FP/MTBD) 1.52 g; yield = 93%. Yellow colorless liquid.  $^1\text{H}$  NMR (400 MHz,  $\text{CDCl}_3$ )  $\delta$  6.92 (q, 1H), 6.44 (ddd, 1H), 6.35 (dt, 1H), 6.20 – 6.10 (m, 1H), 3.32 – 3.25 (m, 2H), 3.27 – 3.03 (m, 6H), 2.94 (s, 3H), 1.90 (p, 2H), 1.81 (p, 2H).  $^{13}\text{C}$  NMR (101 MHz,  $\text{CDCl}_3$ )  $\delta$  163.38, 160.29, 156.40, 148.79, 127.43, 111.06, 100.81, 45.55, 45.17, 44.86, 37.37, 34.95, 18.94, 18.89.  $^{19}\text{F}$  NMR (376 MHz,  $\text{CDCl}_3$ )  $\delta$  -114.42.

#### *p*-FP/MTBD(c')

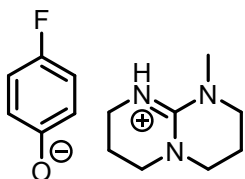

7-methyl-1,5,7-triazabicyclo(4.4.0)dec-5-ene (MTBD) *p*-fluorophenol (*p*-FP/MTBD) 1.50 g; yield = 92%. Yellow colorless liquid.  $^1\text{H}$  NMR (400 MHz,  $\text{CDCl}_3$ )  $\delta$  6.79 – 6.69 (m, 4H), 3.31 – 3.16 (m, 2H), 3.16 – 3.04 (m, 6H), 2.95 (s, 3H), 2.89 – 2.80 (m, 2H), 1.91 – 1.74 (m, 2H).  $^{13}\text{C}$  NMR (101 MHz,  $\text{CDCl}_3$ )  $\delta$  156.52, 154.44, 114.28, 113.26, 45.56, 45.19, 44.88, 37.37, 34.96, 18.99, 18.93.  $^{19}\text{F}$  NMR (376 MHz,  $\text{CDCl}_3$ )  $\delta$  -130.10.

#### 2,3-FP/MTBD(d')

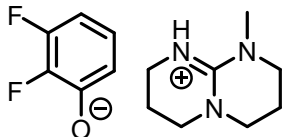

7-methyl-1,5,7-triazabicyclo(4.4.0)dec-5-ene (MTBD) 2,3-difluorophenol (2,3-FP/MTBD) 1.59 g; yield = 91%. Yellow colorless liquid.  $^1\text{H}$  NMR (400 MHz,  $\text{CDCl}_3$ )  $\delta$  6.61 (tdd, 1H), 6.48 (tt, 1H), 6.10 (dddd, 1H), 3.34 – 3.20 (m, 2H), 3.15 (p, 6H), 3.09 – 3.03 (m, 3H), 3.00 (s, 2H), 1.87 (dq, 2H).  $^{13}\text{C}$  NMR (101 MHz,  $\text{CDCl}_3$ )  $\delta$  155.38, 150.90, 148.76, 141.16, 138.83, 120.37, 113.68, 45.50, 45.09, 44.64, 37.35, 35.01, 18.65, 18.55.  $^{19}\text{F}$  NMR (376 MHz, Chloroform-*d*)  $\delta$  -141.58, -165.82.

#### 2,4-FP/MTBD(e')

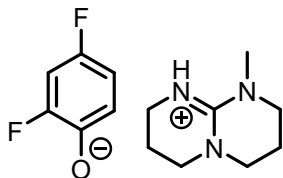

7-methyl-1,5,7-triazabicyclo(4.4.0)dec-5-ene (MTBD) 2,4-difluorophenol (2,4-FP/MTBD) 1.62 g; yield = 93%. Yellow colorless liquid.  $^1\text{H}$  NMR (400 MHz,  $\text{CDCl}_3$ )  $\delta$  6.69 (s, 1H), 6.62 (s, 1H), 6.50 (s, 1H), 3.26 (s, 2H), 3.16 (s, 6H), 3.00 (s, 3H), 1.92 (s, 2H), 1.82 (s, 2H).  $^{13}\text{C}$  NMR (101 MHz,  $\text{CDCl}_3$ )  $\delta$  156.69, 151.21, 149.34, 148.73, 116.15, 107.59, 101.05, 45.45, 45.05, 44.60, 37.24, 34.92, 18.65, 18.56.  $^{19}\text{F}$  NMR (376 MHz, Chloroform-*d*)  $\delta$  -130.73, -134.35.

### 2,6-FP/MTBD(f')

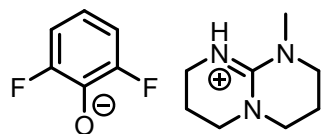

7-methyl-1,5,7-triazabicyclo(4.4.0)dec-5-ene (MTBD) 2,6-difluorophenol (2,6-FP/MTBD) 1.64 g; yield = 94%. Yellow colorless liquid.  $^1\text{H}$  NMR (400 MHz,  $\text{CDCl}_3$ )  $\delta$  6.59 (s, 2H), 6.04 (s, 1H), 3.26 (s, 2H), 3.15 (s, 6H), 3.04 (s, 3H), 1.90 (s, 2H), 1.81 (s, 2H).  $^{13}\text{C}$  NMR (101 MHz,  $\text{CDCl}_3$ )  $\delta$  155.62, 152.07, 129.23, 110.49, 106.41, 48.45, 48.29, 48.21, 42.92, 37.50, 22.73, 22.70.  $^{19}\text{F}$  NMR (376 MHz,  $\text{CDCl}_3$ )  $\delta$  -137.18.

### 2,3,6-FP/MTBD(g')

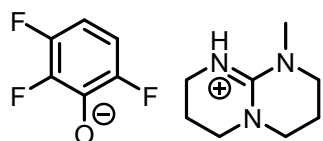

7-methyl-1,5,7-triazabicyclo(4.4.0)dec-5-ene (MTBD) 2,3,6-trifluorophenol (2,3,6-FP/MTBD) 1.70 g; yield = 92%. Yellow colorless liquid.  $^1\text{H}$  NMR (400 MHz,  $\text{CDCl}_3$ )  $\delta$  6.45 (s, 1H), 5.83 (s, 1H), 3.26 (s, 2H), 3.17 (s, 6H), 3.03 (s, 3H), 1.92 (s, 2H), 1.83 (s, 2H).  $^{13}\text{C}$  NMR (101 MHz,  $\text{CDCl}_3$ )  $\delta$  152.03, 149.75, 148.69, 147.76, 145.41, 142.99, 105.23, 45.43, 45.00, 44.45, 37.30, 34.97, 18.41, 18.27.  $^{19}\text{F}$  NMR (376 MHz,  $\text{CDCl}_3$ )  $\delta$  -141.65, -145.68, -162.25.

### 3,4,5-FP/MTBD(h')

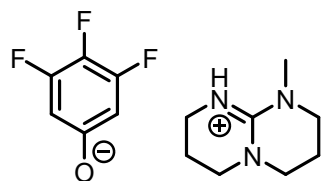

7-methyl-1,5,7-triazabicyclo(4.4.0)dec-5-ene (MTBD) 3,4,5-trifluorophenol (3,4,5-FP/MTBD) 1.72 g; yield = 93%. Yellow colorless liquid.  $^1\text{H}$  NMR (400 MHz,  $\text{CDCl}_3$ )  $\delta$  6.09 (s, 2H), 3.28 (s, 2H), 3.20 (s, 6H), 2.99 (s, 3H), 1.97 (s, 2H), 1.87 (s, 2H).  $^{13}\text{C}$  NMR (101 MHz,  $\text{CDCl}_3$ )  $\delta$  160.45, 155.87, 150.16, 148.75, 147.76, 45.54, 45.11, 44.71, 37.39, 34.99, 18.71, 18.62.  $^{19}\text{F}$  NMR (376 MHz,  $\text{CDCl}_3$ )  $\delta$  -138.78, -182.55.

### 2,3,5,6-FP/MTBD(i')

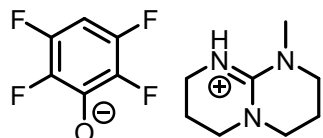

7-methyl-1,5,7-triazabicyclo(4.4.0)dec-5-ene (MTBD) 2, 3, 5, 6-tetrafluorophenol (2,3,5,6-FP/MTBD) 1.77 g; yield = 90%. Yellow colorless liquid.  $^1\text{H}$  NMR (400 MHz,  $\text{CDCl}_3$ )  $\delta$  6.13 (s, 1H), 3.32 (s, 2H), 3.24 (s, 6H), 3.04 (s, 3H), 1.98 (s, 2H), 1.89 (s, 2H).  $^{13}\text{C}$  NMR (101 MHz,  $\text{CDCl}_3$ )  $\delta$  140.65, 137.42, 135.07, 130.74, 128.42, 37.48, 36.97, 36.48, 29.42, 26.93, 10.35, 10.20.  $^{19}\text{F}$  NMR (376 MHz,  $\text{CDCl}_3$ )  $\delta$  -144.72, -164.89.



2,3,4,5,6-FP/MTBD(j')

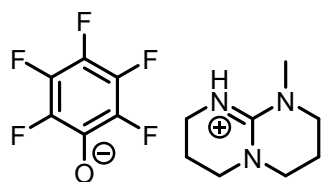

7-methyl-1,5,7-triazabicyclo(4.4.0)dec-5-ene (MTBD) pentafluorophenol (2,3,4,5,6-FP/MTBD) 1.84 g; yield = 89%. Yellow colorless liquid. <sup>1</sup>H NMR (400 MHz, CDCl<sub>3</sub>) δ 3.29 (s, 2H), 3.23 (s, 6H), 3.05 (s, 3H), 1.98 (s, 2H), 1.88 (s, 2H). <sup>13</sup>C NMR (101 MHz, CDCl<sub>3</sub>) δ 148.67, 144.89, 139.88, 137.55, 135.25, 45.48, 44.99, 44.48, 37.35, 34.95, 18.38, 18.22. <sup>19</sup>F NMR (376 MHz, CDCl<sub>3</sub>) δ -170.20, -170.99, -188.38.

Supporting Tables

Table S1. Pearson correlation coefficient between independent and dependent variables

| dependent        | independent variable | Fluorophenol/DMAP's pearson correlation ( <i>r</i> ) |
|------------------|----------------------|------------------------------------------------------|
| $k_{\text{obs}}$ | $K_n$                | -0.14                                                |
| $k_{\text{obs}}$ | $f^+$                | -0.35                                                |
| $k_{\text{obs}}$ | $Q_{\text{H1}}$      | 0.44                                                 |
| $k_{\text{obs}}$ | $Q_{\text{O1}}$      | -0.09                                                |
| $k_{\text{obs}}$ | $Q_{\text{H2}}$      | -0.58                                                |
| $k_{\text{obs}}$ | $Q_{\text{O2}}$      | -0.12                                                |
| $k_{\text{obs}}$ | $\delta_{\text{F}}$  | 0.31                                                 |
| $k_{\text{obs}}$ | $Q_{\text{F}}$       | -0.12                                                |
| $k_{\text{obs}}$ | Int1                 | -0.07                                                |
| $k_{\text{obs}}$ | Int2                 | -0.38                                                |

Table S2. Summary of data from simulation and bench experiment for fluorophenol/DMAP dual catalyst

| Entr y | Catalyst | $K_n$ | $f^+$ | $Q_{\text{O1}}$ | $Q_{\text{F}}$ | Int1 | Int2 | $Q_{\text{H1}}$ | $\delta_{\text{F}}$ | $Q_{\text{H2}}$ | $Q_{\text{O2}}$ | $k_{\text{obs}}$ |
|--------|----------|-------|-------|-----------------|----------------|------|------|-----------------|---------------------|-----------------|-----------------|------------------|
| 1      | a        | -     | 0.1   | -               | -              | -    | -    | 0.2             | -                   | 0.2             | -               | 0.0287           |
|        |          | 0.03  | 3     | 0.765           | 0.36           | 5.91 | 2.18 | 4               | 138.41              | 9               | 0.40            |                  |
| 2      | b        | -     | 0.1   | -               | -              | -    | -    | 0.2             | -                   | 0.3             | -               | 0.0350           |
|        |          | 0.03  | 3     | 0.769           | 0.37           | 8.34 | 5.17 | 4               | 112.77              | 1               | 0.40            |                  |
| 3      | c        | -     | 0.1   | -               | -              | -    | -    | 0.2             | -                   | 0.3             | -               | 0.0257           |
|        |          | 0.04  | 3     | 0.782           | 0.38           | 5.87 | 5.13 | 4               | 126.34              | 0               | 0.40            |                  |
| 4      | d        | -     | 0.1   | -               | -              | -    | -    | 0.2             | -                   | 0.2             | -               | 0.0344           |
|        |          | 0.02  | 1     | 0.758           | 0.35           | 3.04 | 0.81 | 4               | 150.43              | 9               | 0.38            |                  |
| 5      | e        | -     | 0.1   | -               | -              | -    | -    | 0.2             | -                   | 0.2             | -               | 0.0387           |
|        |          | 0.04  | 2     | 0.769           | 0.36           | 8.95 | 9.43 | 5               | 128.27              | 7               | 0.36            |                  |
| 6      | f        | -     | 0.1   | -               | -              | -    | -    | 0.2             | -                   | 0.2             | -               | 0.0324           |
|        |          | 0.31  | 5     | 0.761           | 0.36           | 7.64 | 7.66 | 5               | 133.72              | 7               | 0.36            |                  |

|    |   |      |     |       |      |      |      |     |        |     |      |        |
|----|---|------|-----|-------|------|------|------|-----|--------|-----|------|--------|
| 7  | g | -    | 0.1 | -     | -    | -    | 3.92 | 0.2 | -      | 0.3 | -    | 0.0317 |
|    |   | 0.01 | 6   | 0.753 | 0.35 | 4.93 |      | 4   | 146.28 | 0   | 0.39 |        |
| 8  | h | -    | 0.1 | -     | -    | -    | 0.20 | 0.2 | -      | 0.3 | -    | 0.0286 |
|    |   | 0.02 | 1   | 0.763 | 0.35 | 6.58 |      | 4   | 155.25 | 1   | 0.40 |        |
| 9  | i | -    | 0.1 | -     | -    | -    | 6.75 | 0.2 | -      | 0.3 | -    | 0.0246 |
|    |   | 0.01 | 8   | 0.747 | 0.35 | 4.08 |      | 4   | 154.12 | 0   | 0.35 |        |
| 10 | j | -    | 0.1 | -     | -    | -    | 7.51 | 0.2 | -      | 0.3 | -    | 0.0316 |
|    |   | 0.01 | 8   | 0.751 | 0.34 | 0.95 |      | 3   | 170.40 | 0   | 0.35 |        |

**Table S3.** The combined independent variables for multi linear regression of fluorophenol/DMAP dual catalyst

| Entry | Variable_1 | Variable_2 | Variable_3 | Variable_4 | Variable_5 | Variable_6 |
|-------|------------|------------|------------|------------|------------|------------|
| 1     | $f^+$      | $Q_{O1}$   | Int1       | Int2       | $Q_{H1}$   | $\delta_F$ |
| 2     | $f^+$      | $Q_F$      | Int1       | Int2       | $Q_{H1}$   | $\delta_F$ |
| 3     | $K_n$      | $f^+$      | $Q_{O1}$   | $Q_F$      | Int1       | $\delta_F$ |
| 4     | $K_n$      | $Q_F$      | Int1       | Int2       | $Q_{H1}$   | $\delta_F$ |
| 5     | $K_n$      | $f^+$      | $Q_{O1}$   | $Q_F$      | Int1       | Int2       |
| 6     | $K_n$      | $f^+$      | $Q_{O1}$   | $Q_F$      | Int1       | $Q_{H1}$   |
| 7     | $K_n$      | $Q_{O1}$   | $Q_F$      | Int1       | Int2       | $Q_{H1}$   |
| 8     | $K_n$      | $Q_F$      | Int1       | Int2       | $Q_{H1}$   | $\delta_F$ |
| 9     | $f^+$      | $Q_{O1}$   | $Q_F$      | Int1       | Int2       | $Q_{H1}$   |
| 10    | $f^+$      | $Q_{O1}$   | $Q_F$      | Int1       | Int2       | $Q_{H1}$   |
| 11    | $K_n$      | $f^+$      | $Q_{O1}$   | $Q_F$      | Int1       | Int2       |
| 12    | $K_n$      | $f^+$      | $Q_{O1}$   | $Q_F$      | Int1       | $\delta_F$ |
| 13    | $K_n$      | $f^+$      | $Q_F$      | Int1       | Int2       | $Q_{H1}$   |
| 14    | $K_n$      | $Q_{O1}$   | $Q_F$      | Int1       | Int2       | $\delta_F$ |
| 15    | $K_n$      | $f^+$      | $Q_{O1}$   | $Q_F$      | Int1       | Int2       |
| 16    | $K_n$      | $f^+$      | $Q_{O1}$   | $Q_F$      | Int1       | Int2       |
| 17    | $K_n$      | $f^+$      | $Q_{O1}$   | $Q_F$      | Int1       | Int2       |
| 18    | $K_n$      | $f^+$      | $Q_{O1}$   | $Q_F$      | Int1       | Int2       |
| 19    | $K_n$      | $f^+$      | $Q_{O1}$   | $Q_F$      | Int1       | $Q_{H1}$   |
| 20    | $K_n$      | $f^+$      | $Q_{O1}$   | $Q_F$      | Int2       | $Q_{H1}$   |
| 21    | $K_n$      | $f^+$      | $Q_{O1}$   | Int1       | Int2       | $Q_{H1}$   |
| 22    | $K_n$      | $f^+$      | $Q_F$      | Int1       | Int2       | $Q_{H1}$   |
| 23    | $K_n$      | $Q_{O1}$   | $Q_F$      | Int1       | Int2       | $Q_{H1}$   |

**Table S4.** Pearson correlation coefficient between independent and dependent variables

| dependent        | independent variable | Fluorophenol/MTBD's pearson correlation ( <i>r</i> ) |
|------------------|----------------------|------------------------------------------------------|
| $k_{\text{obs}}$ | $K_n$                | -0.27                                                |
| $k_{\text{obs}}$ | $f^+$                | -0.41                                                |
| $k_{\text{obs}}$ | $Q_{\text{H1}}$      | -0.50                                                |
| $k_{\text{obs}}$ | $Q_{\text{O1}}$      | -0.30                                                |
| $k_{\text{obs}}$ | $Q_{\text{H2}}$      | 0.09                                                 |
| $k_{\text{obs}}$ | $Q_{\text{O2}}$      | -0.28                                                |
| $k_{\text{obs}}$ | $\delta_{\text{F}}$  | 0.20                                                 |
| $k_{\text{obs}}$ | $Q_{\text{F}}$       | -0.32                                                |
| $k_{\text{obs}}$ | Int1                 | -0.39                                                |
| $k_{\text{obs}}$ | Int2                 | -0.34                                                |

**Table S5.** Summary of data from simulation and bench experiment for fluorophenol/MTBD dual catalyst

| Entry | Catalyst | $K_n$ | $f^+$ | $Q_{\text{O1}}$ | $Q_{\text{F}}$ | Int1  | Int2  | $Q_{\text{H1}}$ | $\delta_{\text{F}}$ | $Q_{\text{H2}}$ | $Q_{\text{O2}}$ | $k_{\text{obs}}$ |
|-------|----------|-------|-------|-----------------|----------------|-------|-------|-----------------|---------------------|-----------------|-----------------|------------------|
| 1     | a'       | 0.03  | 0.13  | -0.765          | -0.37          | 7.69  | 19.99 | 0.36            | -138.15             | 0.28            | -0.30           | 0.2103           |
| 2     | b'       | 0.03  | 0.14  | -0.769          | -0.38          | 5.45  | 16.34 | 0.35            | -114.42             | 0.28            | -0.30           | 0.0793           |
| 3     | c'       | 0.02  | 0.13  | -0.782          | -0.38          | 6.93  | 13.49 | 0.35            | -130.10             | 0.28            | -0.30           | 0.0736           |
| 4     | d'       | 0.03  | 0.12  | -0.758          | -0.36          | 7.74  | 20.01 | 0.37            | -153.72             | 0.28            | -0.31           | 0.1048           |
| 5     | e'       | 0.03  | 0.12  | -0.769          | -0.37          | 7.10  | 16.97 | 0.36            | -132.54             | 0.28            | -0.30           | 0.0200           |
| 6     | f'       | 0.03  | 0.16  | -0.761          | -0.36          | 9.99  | 28.29 | 0.37            | -137.18             | 0.28            | -0.31           | 0.0358           |
| 7     | g'       | 0.04  | 0.17  | -0.753          | -0.36          | 10.41 | 49.52 | 0.39            | -149.87             | 0.28            | -0.29           | 0.0255           |
| 8     | h'       | 0.04  | 0.12  | -0.763          | -0.35          | 7.21  | 18.98 | 0.36            | -160.67             | 0.28            | -0.29           | 0.0538           |
| 9     | i'       | 0.04  | 0.19  | -0.747          | -0.35          | 10.30 | 26.14 | 0.38            | -154.80             | 0.27            | -0.30           | 0.0080           |
| 10    | j'       | 0.04  | 0.19  | -0.751          | -0.34          | 8.22  | 25.86 | 0.38            | -176.51             | 0.27            | -0.28           | 0.0475           |

**Table S6.** The combined independent variables for multi linear regression of fluorophenol/MTBD dual catalyst

| Entry | Variable_1 | Variable_2 | Variable_3 | Variable_4 | Variable_5 | Variable_6 | Variable_7 |
|-------|------------|------------|------------|------------|------------|------------|------------|
| 1     | $f^+$      | $Q_{H1}$   | $Q_{O1}$   | $Q_{H2}$   | $Q_{O2}$   | $Q_F$      | $\delta_F$ |
| 2     | $Q_{H1}$   | $Q_{O1}$   | $Q_{H2}$   | $Q_{O2}$   | $Q_F$      | $\delta_F$ | Int.       |
| 3     | $K_n$      | $f^+$      | $Q_{H1}$   | $Q_{O1}$   | $Q_{H2}$   | $Q_F$      | $\delta_F$ |
| 4     | $K_n$      | $f^+$      | $Q_{H1}$   | $Q_{O1}$   | $Q_{H2}$   | $Q_{O2}$   | $Q_F$      |
| 5     | $K_n$      | $f^+$      | $Q_{H1}$   | $Q_{O1}$   | $Q_{H2}$   | $Q_F$      | $\delta_F$ |
| 6     | $K_n$      | $f^+$      | $Q_{H1}$   | $Q_{O1}$   | $Q_{H2}$   | $Q_F$      | $\delta_F$ |
| 7     | $K_n$      | $Q_{H1}$   | $Q_{O1}$   | $Q_{H2}$   | $Q_{O2}$   | $Q_F$      | $\delta_F$ |
| 8     | $f^+$      | $Q_{H1}$   | $Q_{O1}$   | $Q_{H2}$   | $Q_{O2}$   | $Q_F$      | $\delta_F$ |
| 9     | $f^+$      | $Q_{H1}$   | $Q_{O1}$   | $Q_{H2}$   | $Q_{O2}$   | $Q_F$      | $\delta_F$ |
| 10    | $K_n$      | $f^+$      | $Q_{H1}$   | $Q_{H2}$   | $\delta_F$ | Int1       | Int.       |
| 11    | $K_n$      | $f^+$      | $Q_{H1}$   | $Q_{O1}$   | $Q_{H2}$   | $\delta_F$ | Int.       |
| 12    | $K_n$      | $f^+$      | $Q_{H1}$   | $Q_{O1}$   | $Q_{O2}$   | $Q_F$      | $\delta_F$ |
| 13    | $K_n$      | $f^+$      | $Q_{H1}$   | $Q_{H2}$   | $Q_{O2}$   | $\delta_F$ | Int.       |
| 14    | $K_n$      | $f^+$      | $Q_{H1}$   | $Q_{H2}$   | $Q_F$      | $\delta_F$ | Int.       |
| 15    | $K_n$      | $f^+$      | $Q_{O1}$   | $Q_{H2}$   | $Q_{O2}$   | $Q_F$      | Int.       |
| 16    | $K_n$      | $f^+$      | $Q_{H1}$   | $Q_{O1}$   | $Q_{H2}$   | $Q_{O2}$   | $Q_F$      |
| 17    | $K_n$      | $f^+$      | $Q_{H1}$   | $Q_{O1}$   | $Q_{H2}$   | $Q_{O2}$   | $Q_F$      |
| 18    | $K_n$      | $f^+$      | $Q_{H1}$   | $Q_{O1}$   | $Q_{H2}$   | $Q_{O2}$   | $Q_F$      |
| 19    | $K_n$      | $f^+$      | $Q_{H1}$   | $Q_{O1}$   | $Q_{H2}$   | $Q_{O2}$   | $\delta_F$ |
| 20    | $K_n$      | $f^+$      | $Q_{H1}$   | $Q_{O1}$   | $Q_{H2}$   | $Q_F$      | $\delta_F$ |
| 21    | $K_n$      | $f^+$      | $Q_{H1}$   | $Q_{O1}$   | $Q_{O2}$   | $Q_F$      | $\delta_F$ |
| 22    | $K_n$      | $f^+$      | $Q_{H1}$   | $Q_{H2}$   | $Q_{O2}$   | $Q_F$      | $\delta_F$ |
| 23    | $K_n$      | $f^+$      | $Q_{O1}$   | $Q_{H2}$   | $Q_{O2}$   | $Q_F$      | $\delta_F$ |
| 24    | $K_n$      | $Q_{H1}$   | $Q_{O1}$   | $Q_{H2}$   | $Q_{O2}$   | $Q_F$      | $\delta_F$ |

## Supporting Figures

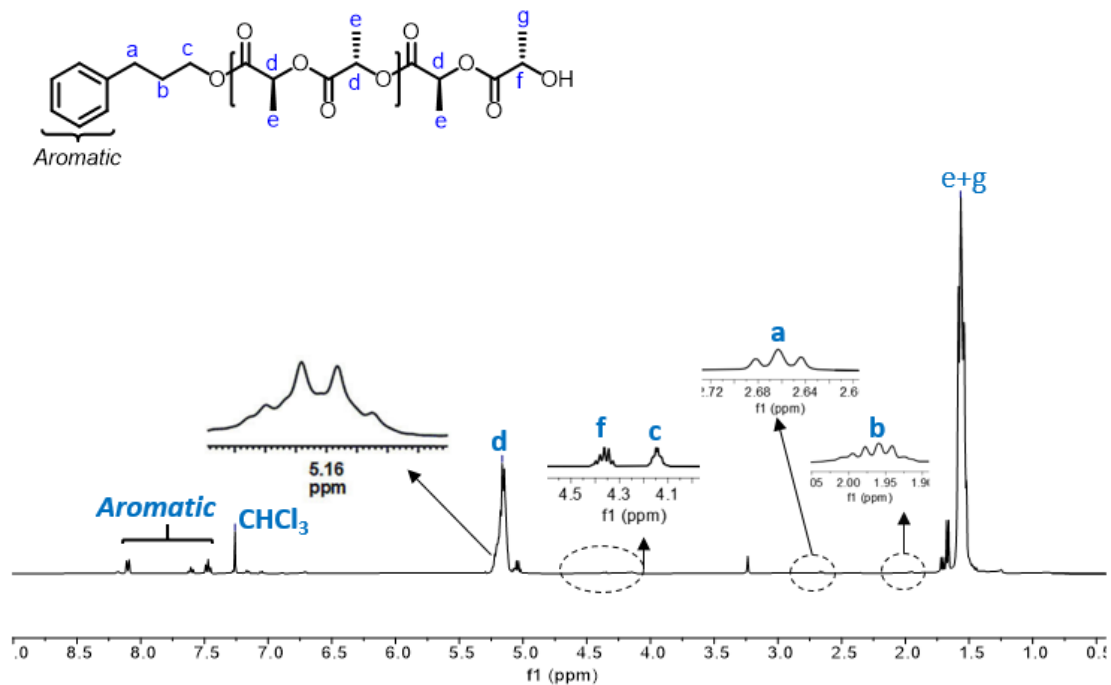

**Figure S1.**  $^1\text{H}$  NMR spectrum of poly(lactide) initiated by PPA in  $\text{CDCl}_3$  (Table 1, entry 1). Experimental conditions: 1.6 mmol LLA,  $[\text{PPA}]_0/[\text{p-FP/DMAP}]_0/[\text{LLA}]_0 = 1/1/100$ , at  $140^\circ\text{C}$ , in bulk for 1 h.

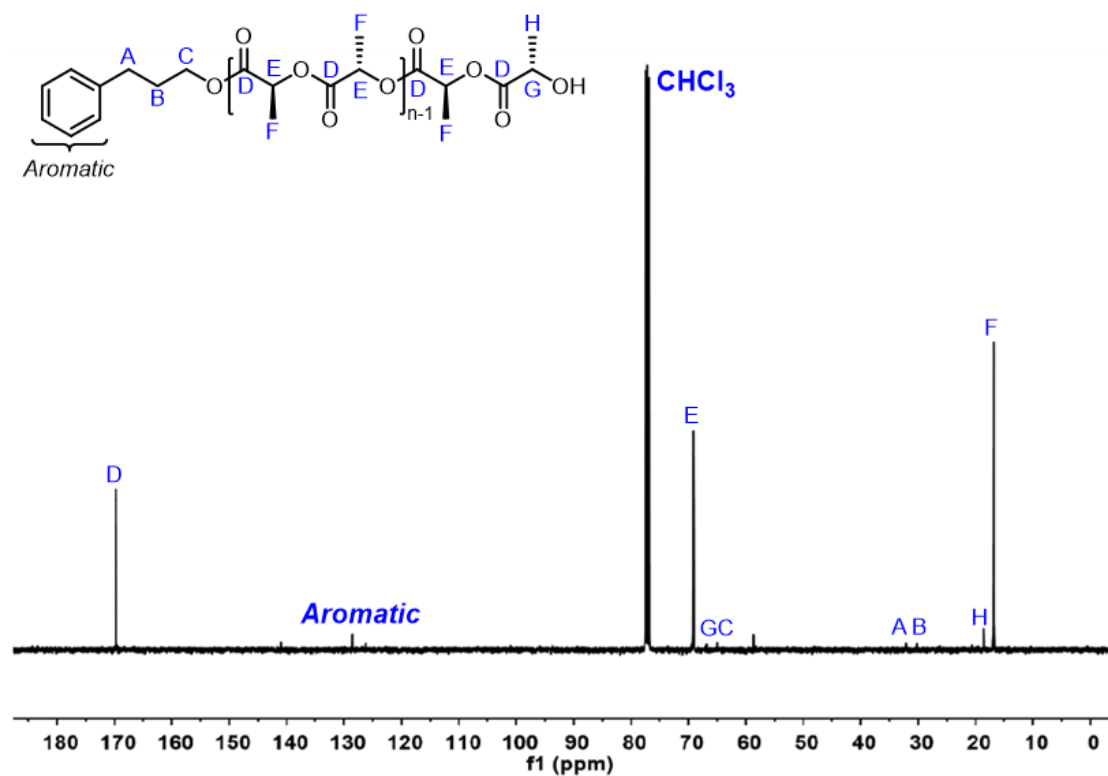

**Figure S2.**  $^{13}\text{C}$  NMR spectrum of poly(lactide) initiated by PPA in  $\text{CDCl}_3$  (Table 1, entry 1). Experimental

conditions: 1.6 mmol LLA,  $[PPA]_0/[p\text{-FP/DMAP}]_0/[LLA]_0 = 1/1/100$ , at 140 °C, in bulk for 1 h.

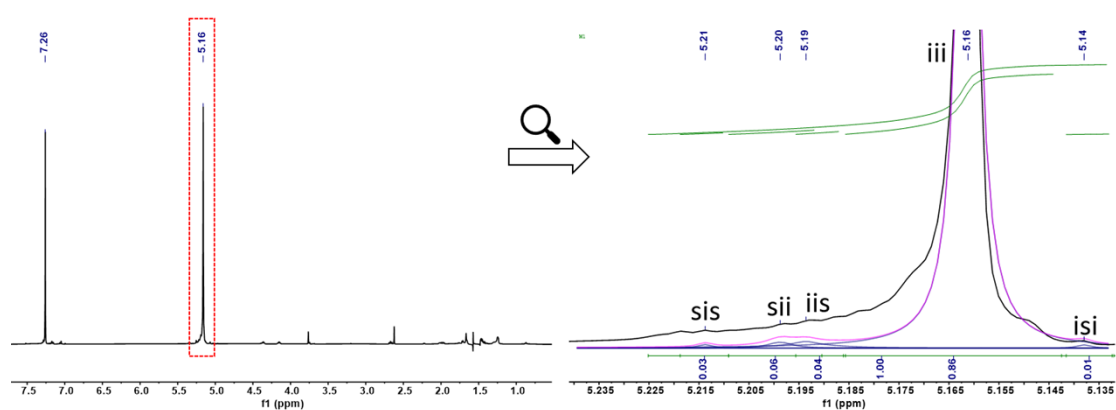

**Figure S3.** Stacked homonuclear decoupled  $^1\text{H}$  NMR spectrum (400 MHz,  $\text{CDCl}_3$ ) of PLA obtained (Table 1, entry 1)<sup>2</sup>.

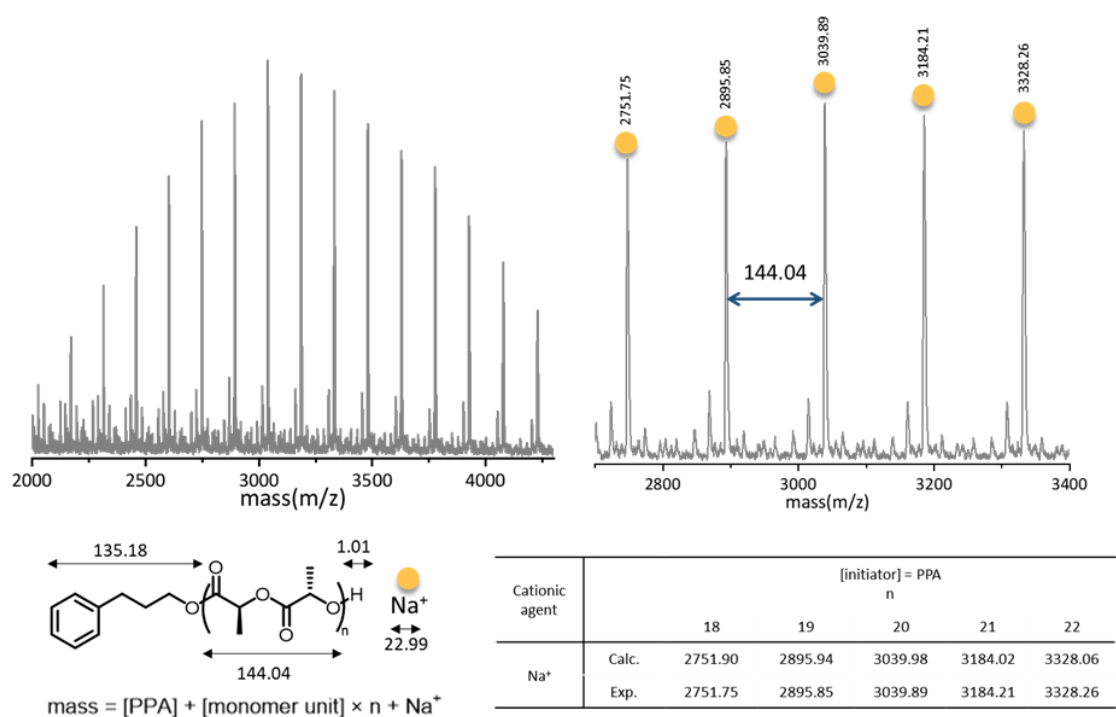

**Figure S4.** MALDI-TOF MS spectrum of PLLA obtained from LLA (Table 1, entry 1), magnification between  $m/z = 2000$  and  $m/z = 4250$ . Experimental conditions:  $[M]_0/[I]_0:100/1$ , 140 °C, 20min. Purification was performed by precipitation in methanol.

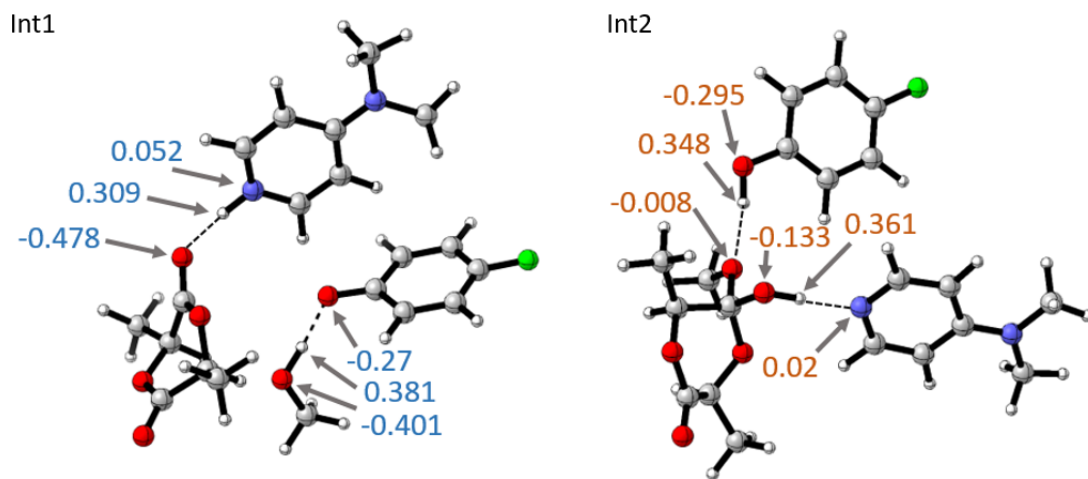

**Figure S5.** The mulliken charge distribution of involved atoms (Int1 and Int2) calculated with BY3LP/6-31G+(d,p).

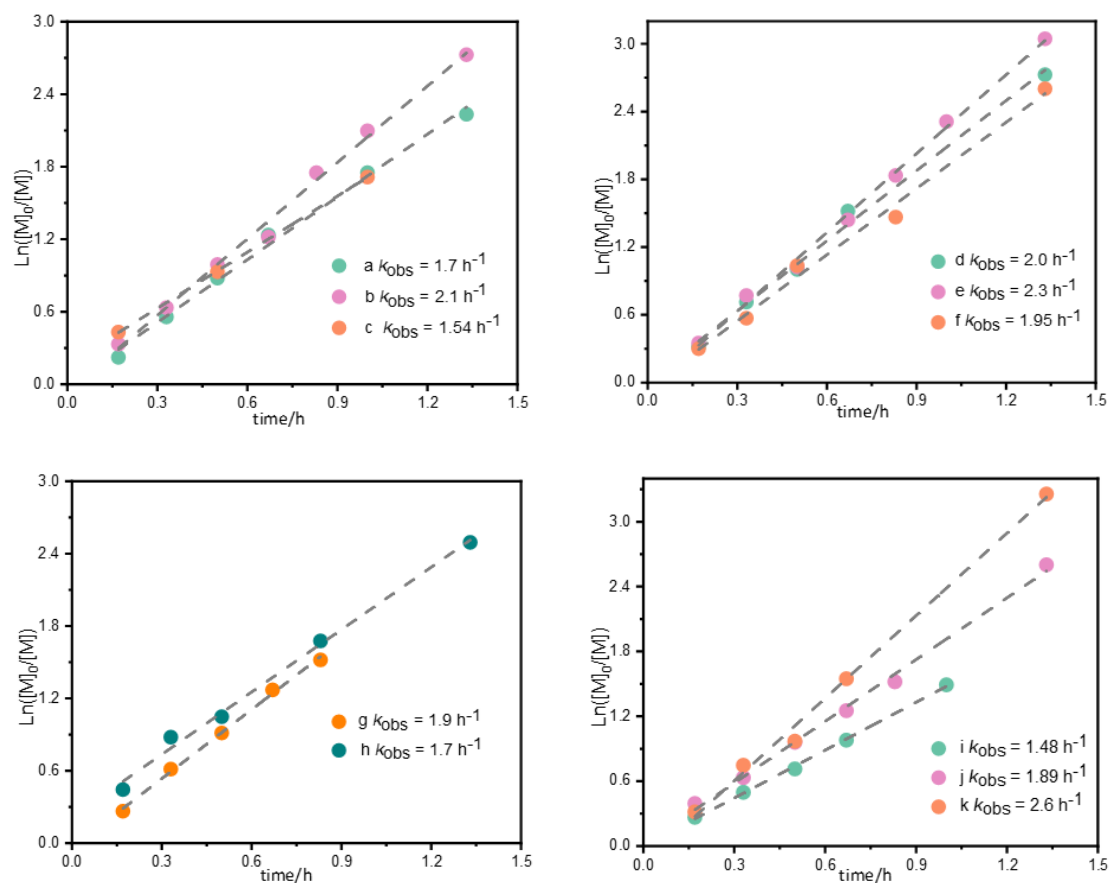

**Figure S6.** semilogarithmic kinetic plot of the ROP of LLAs using DMAP with fluorophenol. Experimental conditions:  $[M]_0/[I]_0$ :100/1, 140 °C.



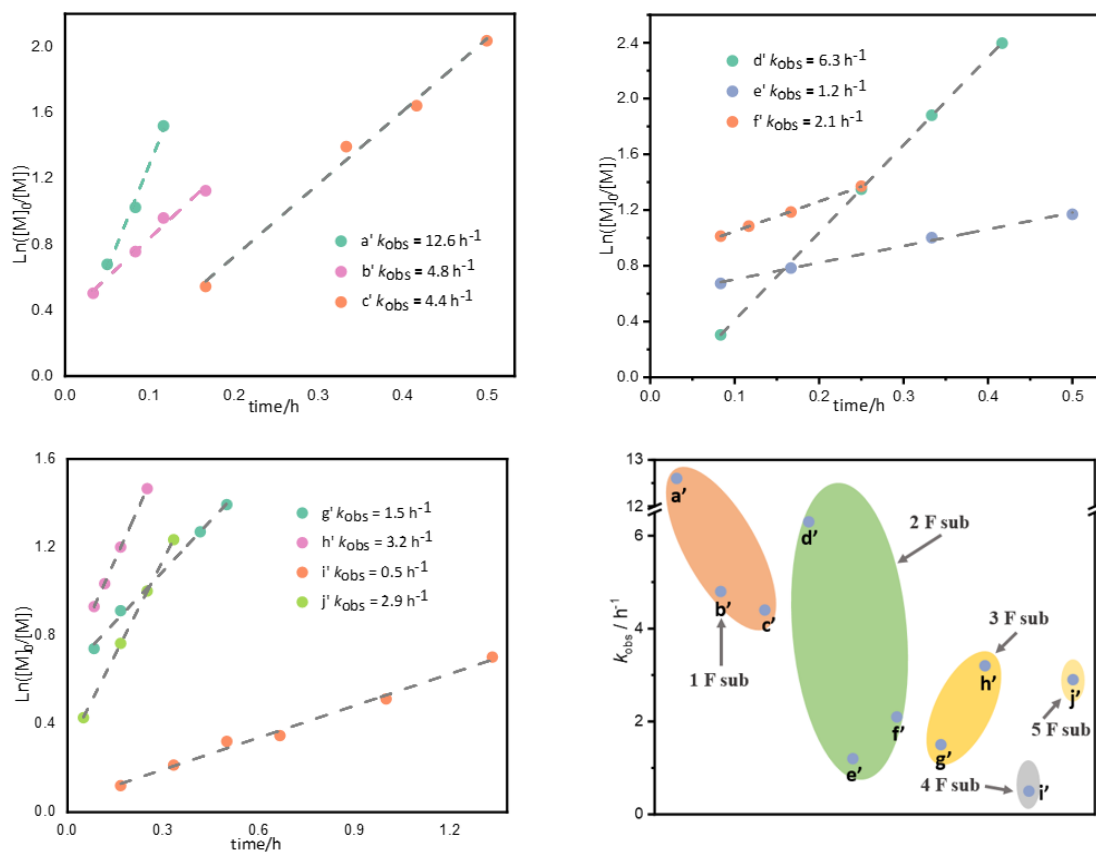

**Figure S7.** semilogarithmic kinetic plot of the ROP of LLAs using MTBD with fluorophenol. Experimental conditions:  $[M]_0/[I]_0$ :100/1, 140 °C.

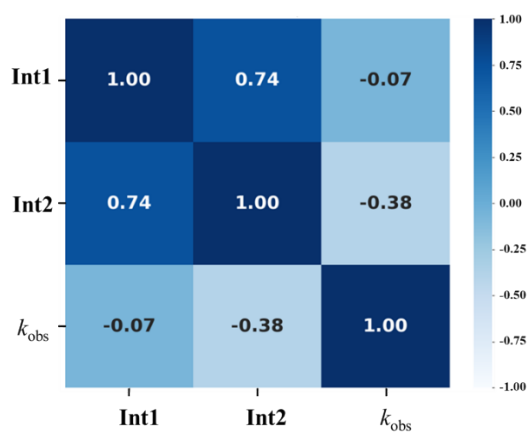

**Figure S8.** Heatmap representing the correlation between  $k_{obs}$  and single descriptor for fluorophenol/DMAP, deeper blue color represents stronger correlation.

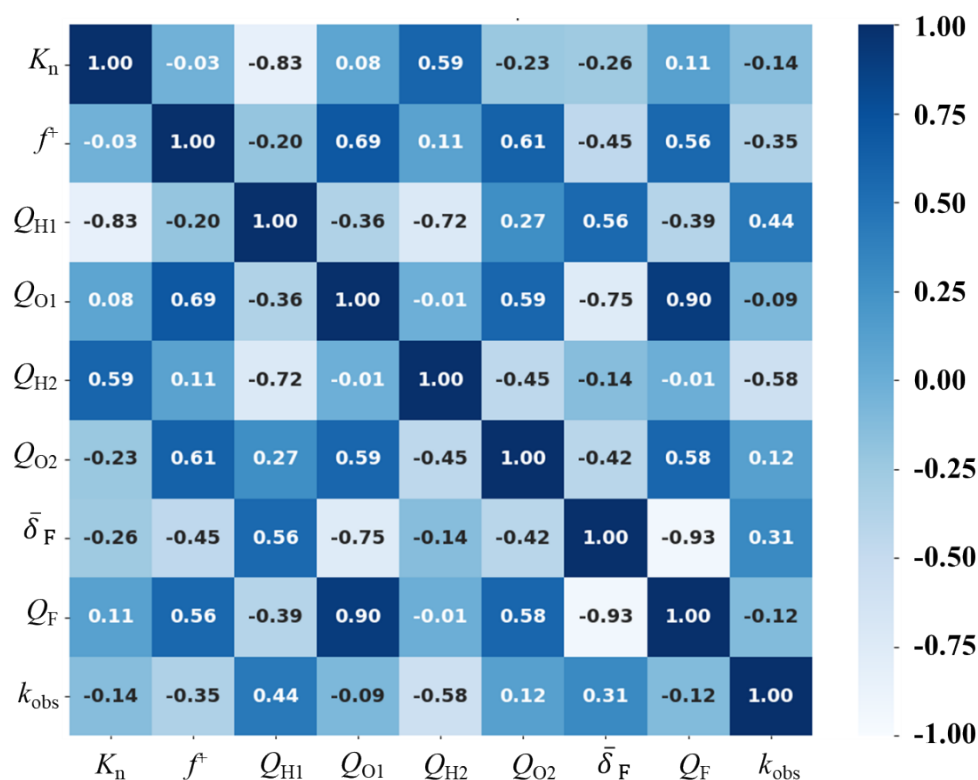

**Figure S9.** Heatmap representing the correlation between  $k_{obs}$  and single descriptor (electronic, thermodynamic, and bench results) for fluorophenol/DMAP, deeper blue color represents stronger correlation.

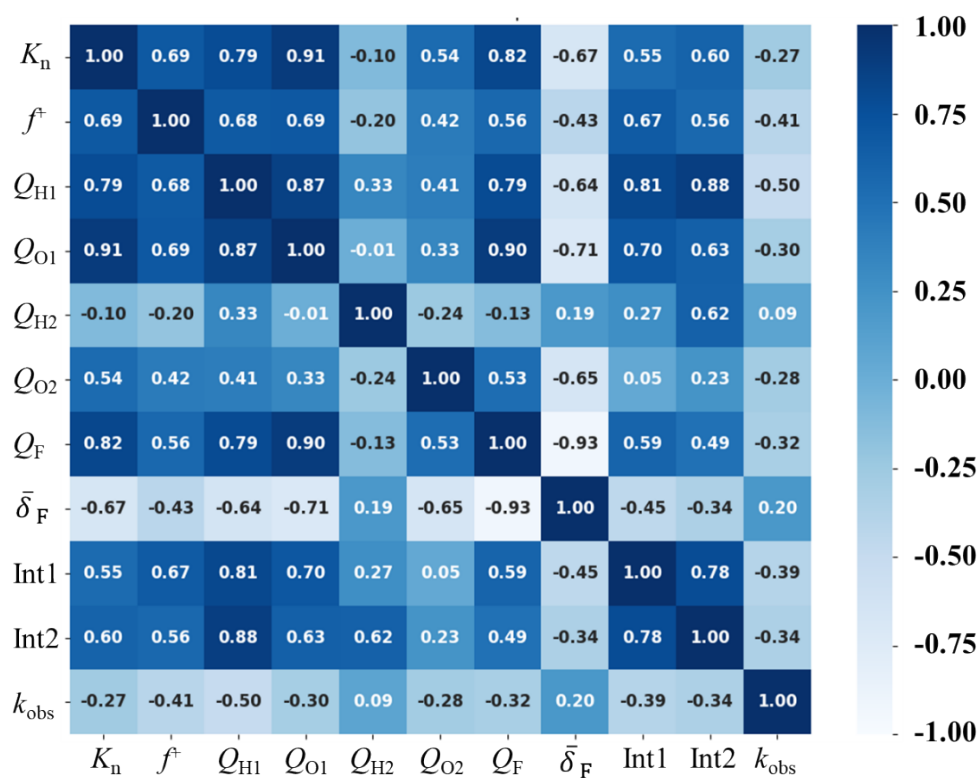

**Figure S10.** Heatmap representing the correlation between  $k_{obs}$  and single descriptor (electronic,

thermodynamic, and bench results) for fluorophenol/MTBD, deeper blue color represents stronger correlation.

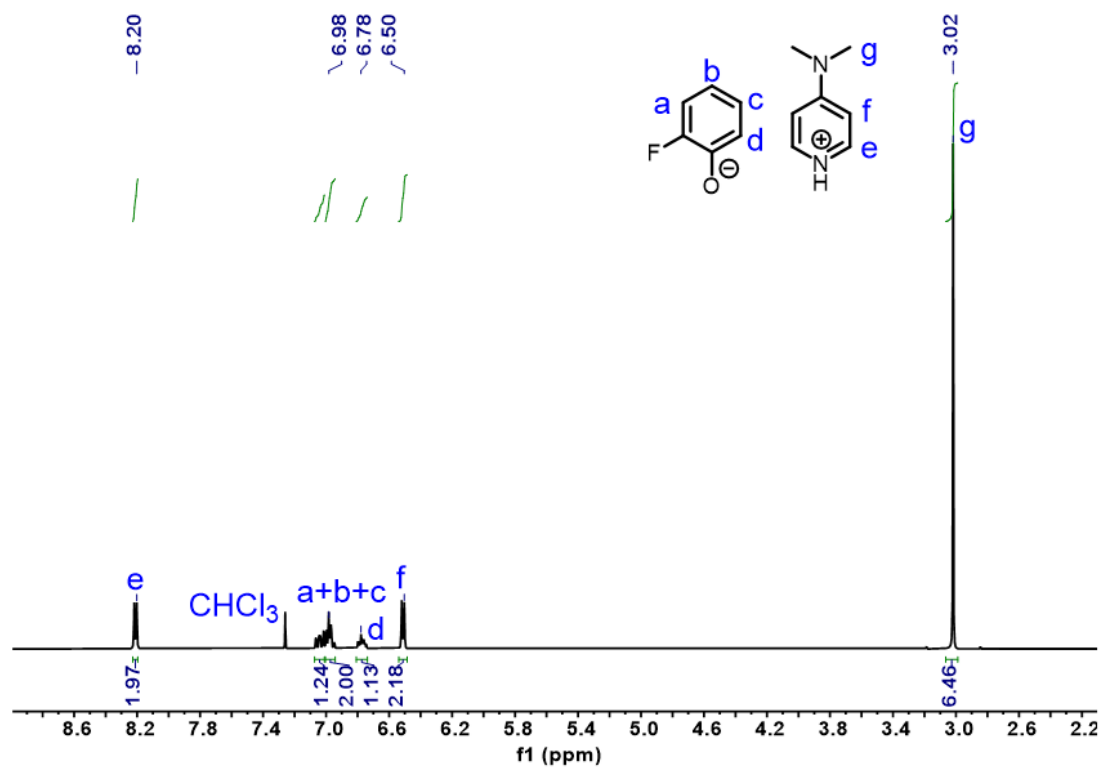

Figure S11.  $^1\text{H}$  NMR spectrum ( $\text{CDCl}_3$ , 400 MHz) of *o*-FP/DMAP(a)

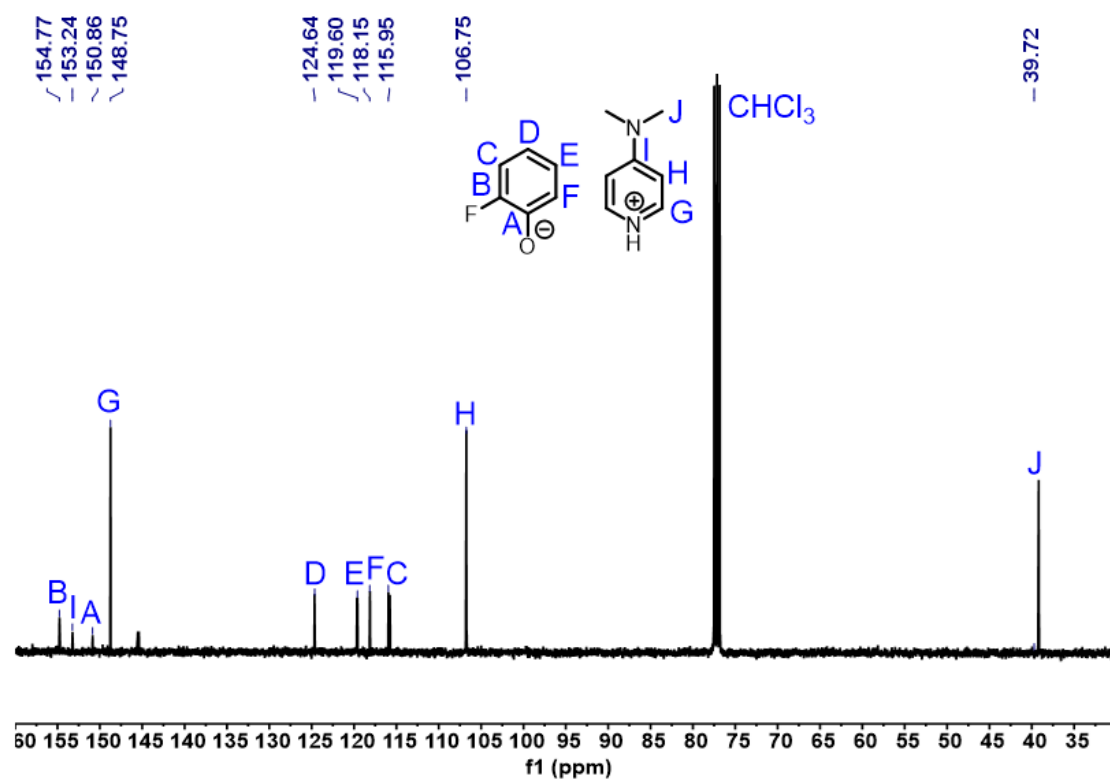

Figure S12.  $^{13}\text{C}$  NMR spectrum ( $\text{CDCl}_3$ , 101 MHz) of *o*-FP/DMAP (a)

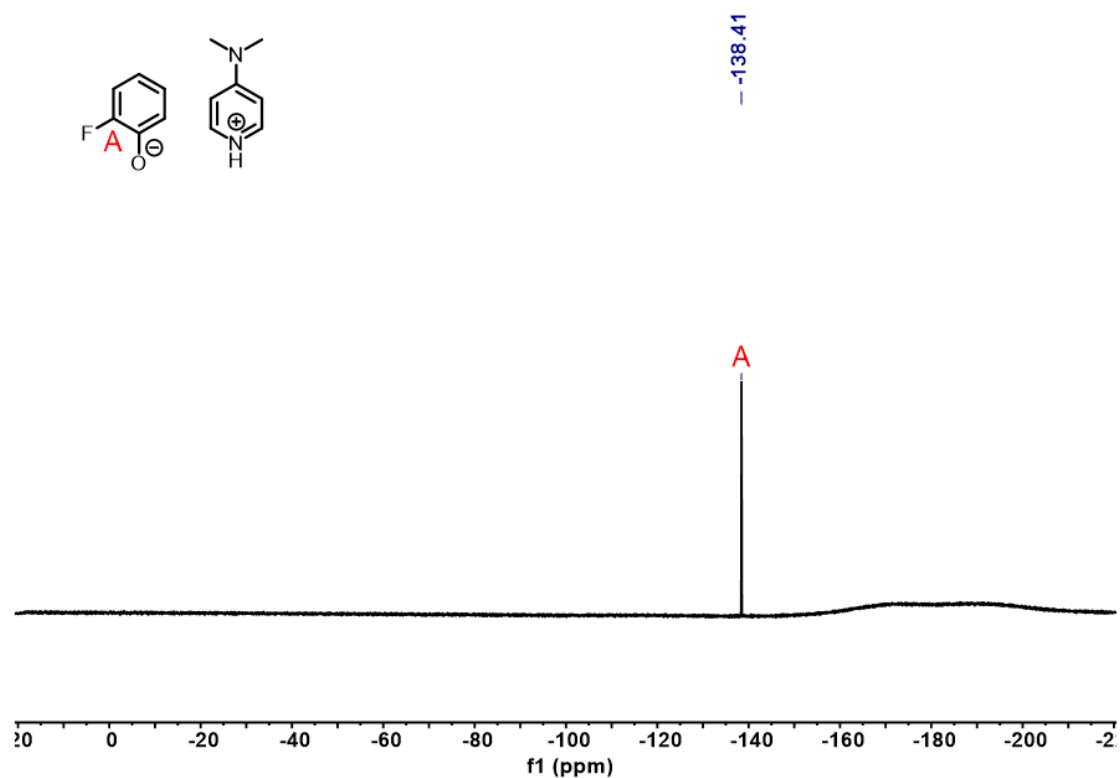

Figure S13. <sup>19</sup>F NMR spectrum (CDCl<sub>3</sub>, 376 MHz) of *o*-FP/DMAP (a)

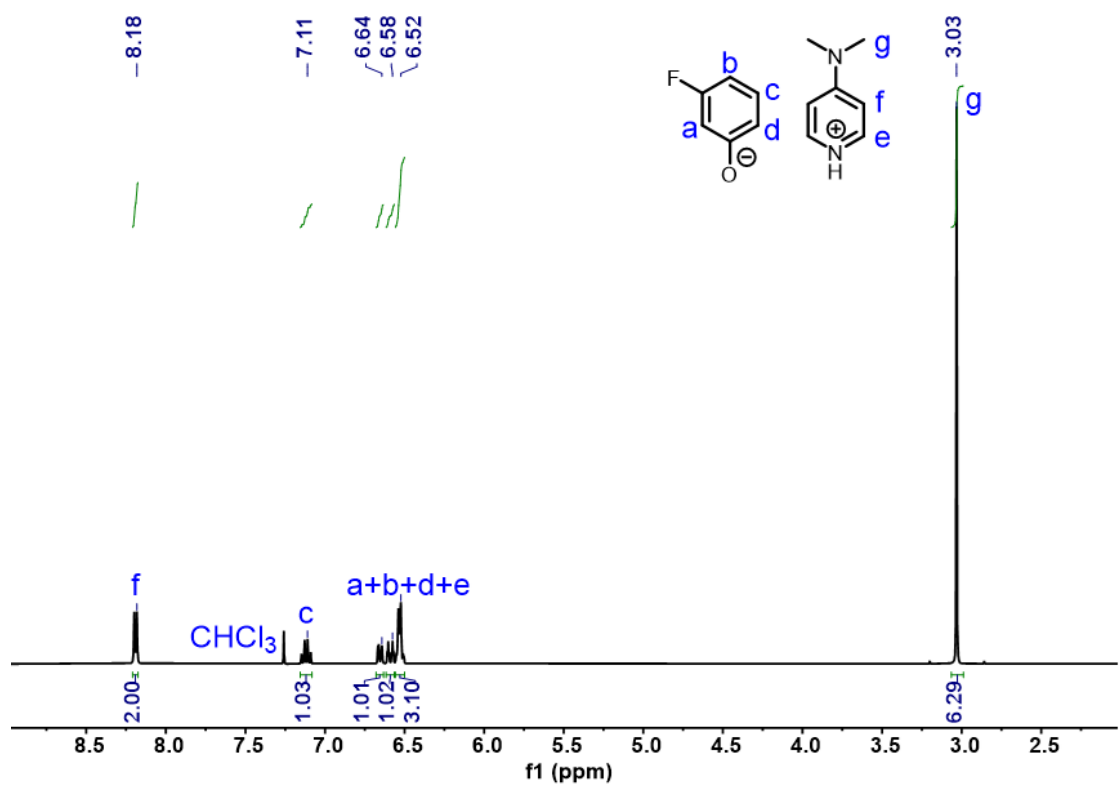

Figure S14. <sup>1</sup>H NMR spectrum (CDCl<sub>3</sub>, 400 MHz) of *m*-FP/DMAP (b)

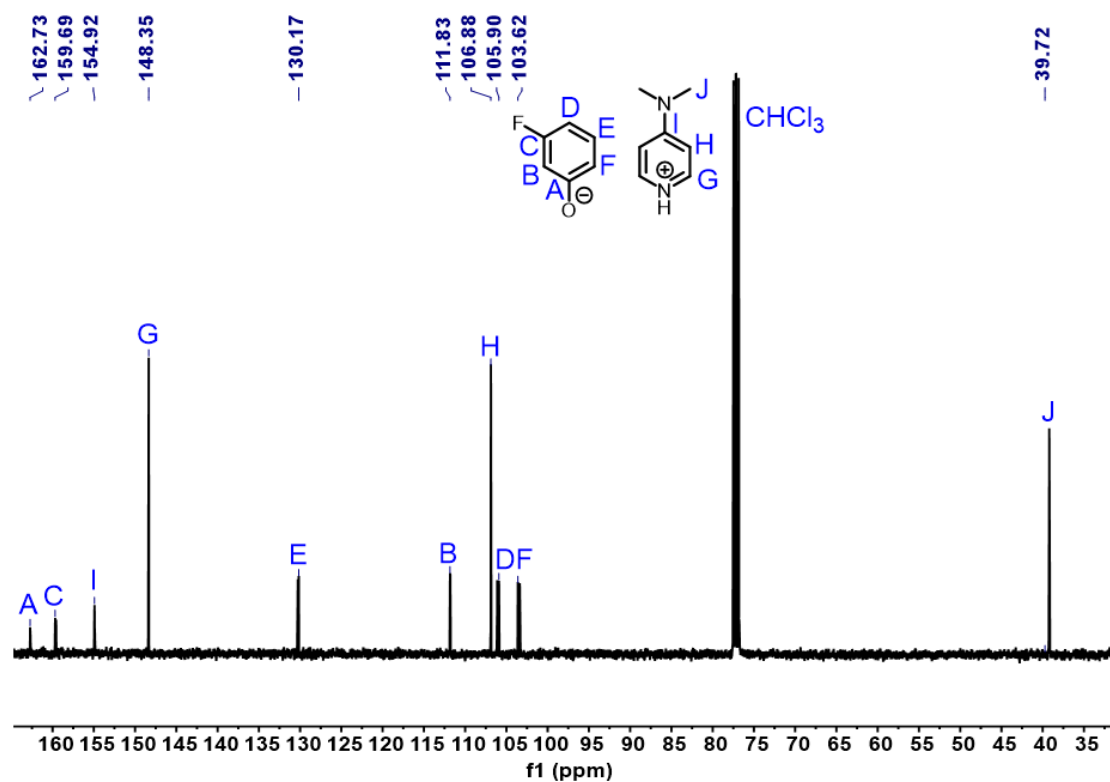

Figure S15. <sup>13</sup>C NMR spectrum (CDCl<sub>3</sub>, 101 MHz) of *m*-FP/DMAP (b)

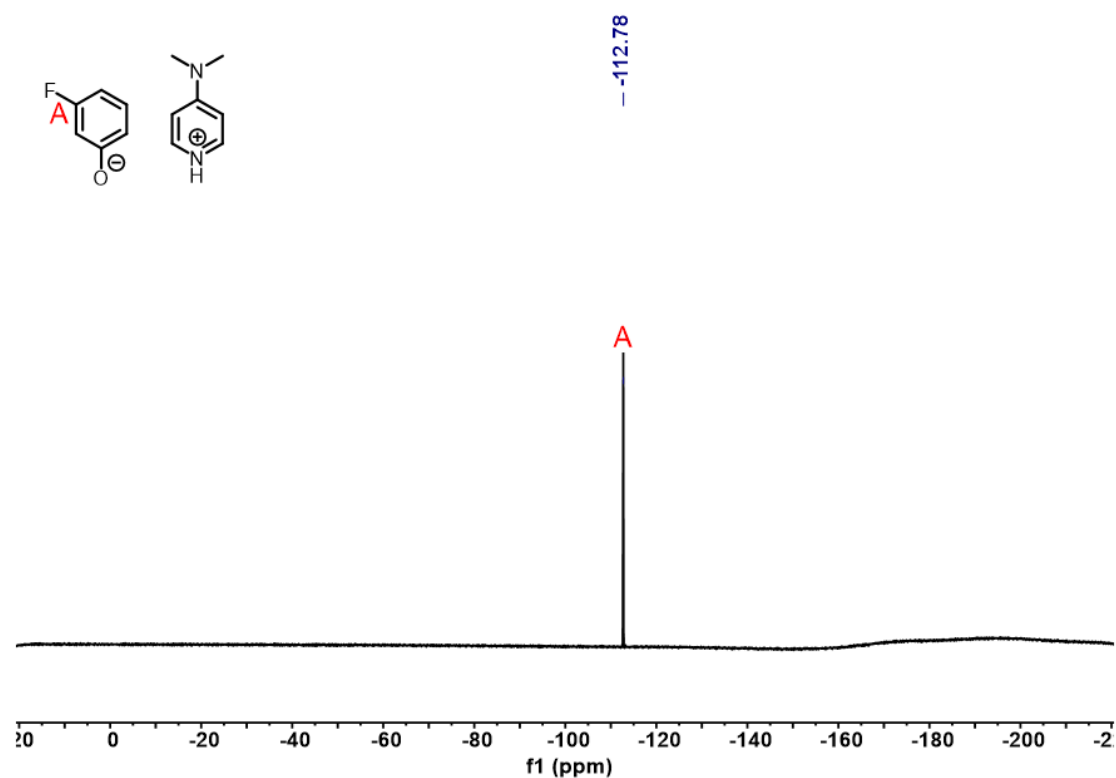

Figure S16. <sup>19</sup>F NMR spectrum (CDCl<sub>3</sub>, 376 MHz) of *m*-FP/DMAP (b)

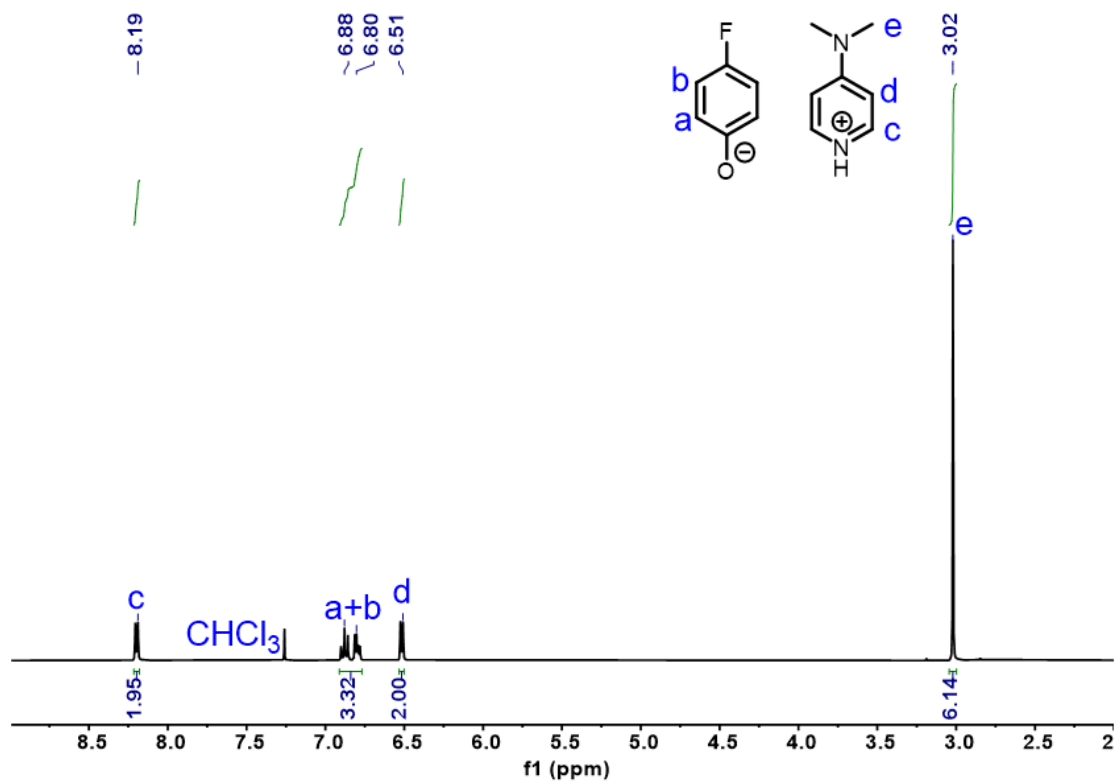

Figure S17. <sup>1</sup>H NMR spectrum (CDCl<sub>3</sub>, 400 MHz) of *p*-FP/DMAP (c)

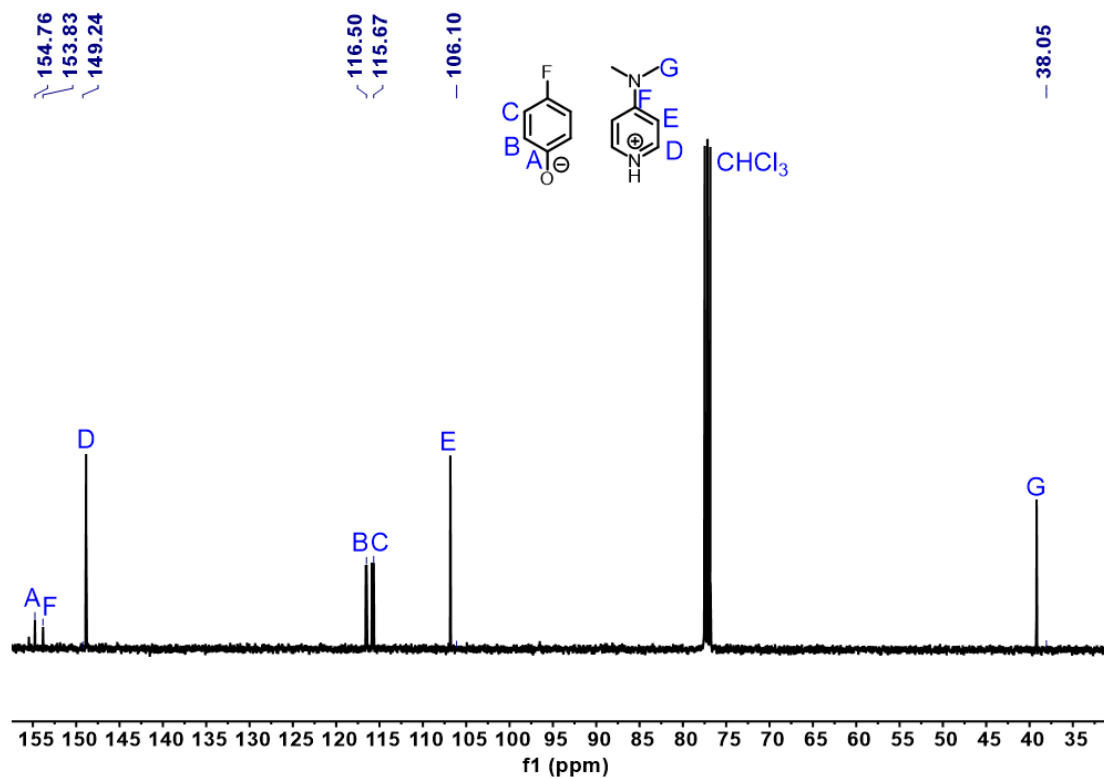

Figure S18. <sup>13</sup>C NMR spectrum (CDCl<sub>3</sub>, 101 MHz) of *p*-FP/DMAP (c)

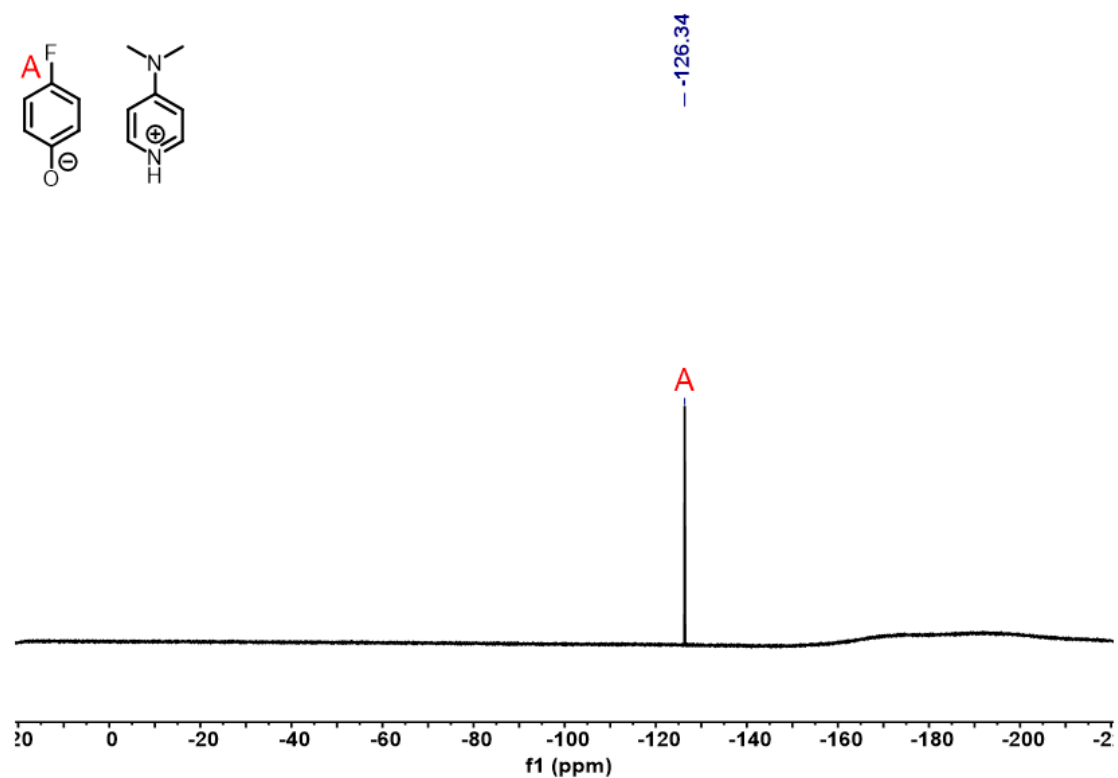

Figure S19.  $^{19}\text{F}$  NMR spectrum ( $\text{CDCl}_3$ , 376 MHz) of *p*-FP/DMAP (c)

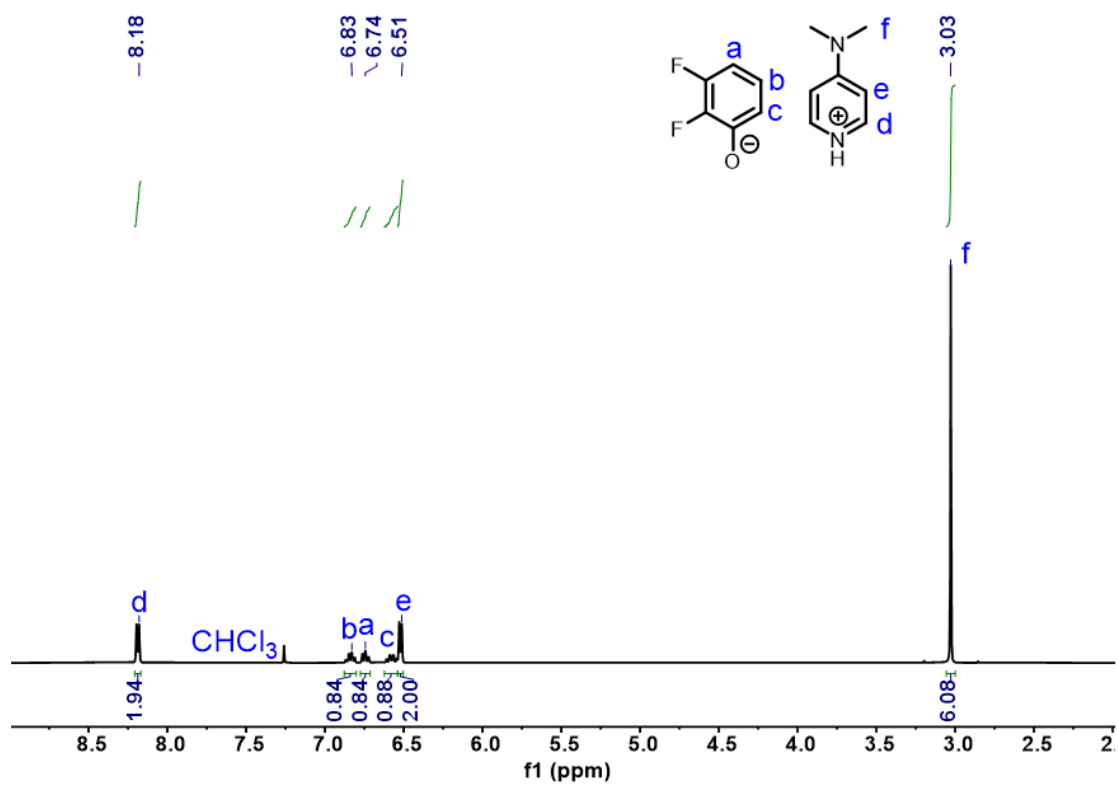

Figure S20.  $^1\text{H}$  NMR spectrum ( $\text{CDCl}_3$ , 400 MHz) of 2,3-FP/DMAP (d)

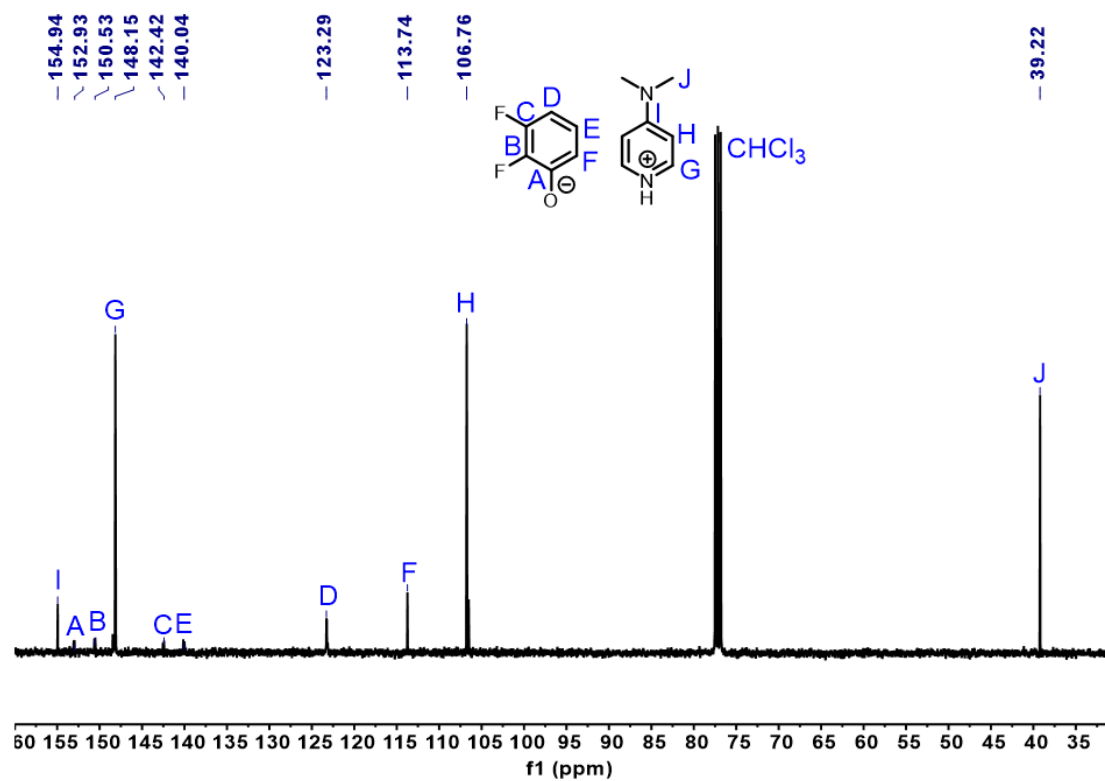

Figure S21.  $^{13}\text{C}$  NMR spectrum ( $\text{CDCl}_3$ , 101 MHz) of 2,3-FP/DMAP (d)

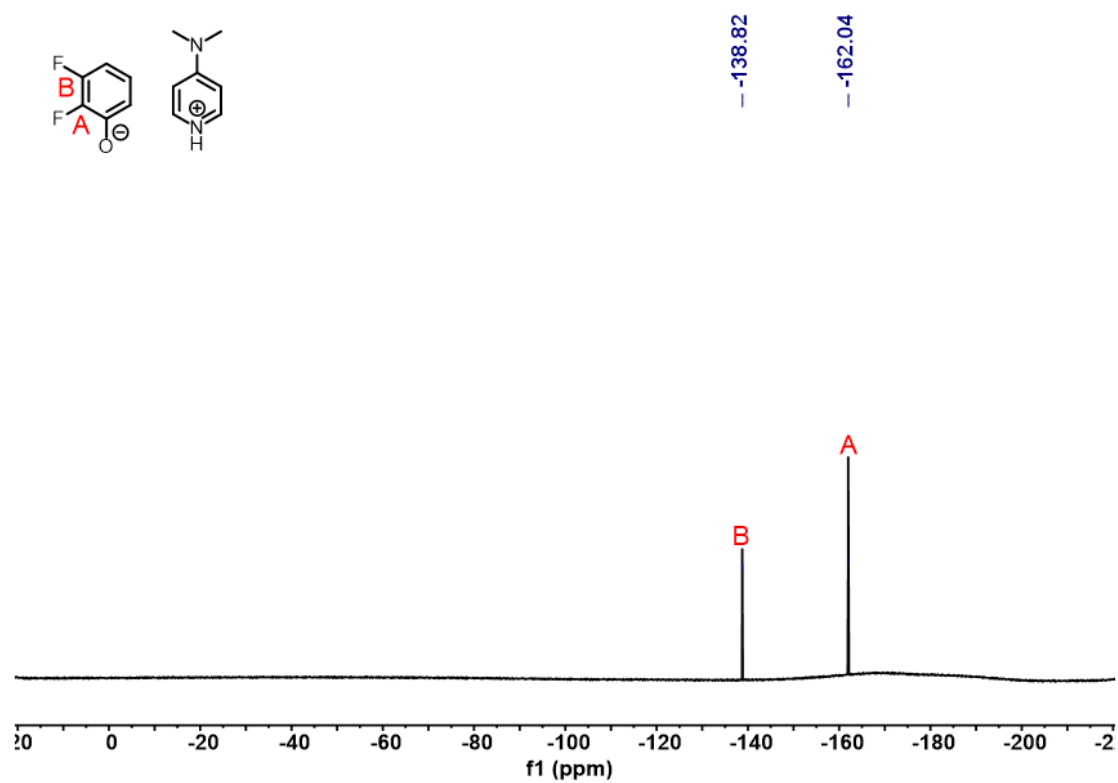

Figure S22.  $^{19}\text{F}$  NMR spectrum ( $\text{CDCl}_3$ , 376 MHz) of 2,3-FP/DMAP (d)



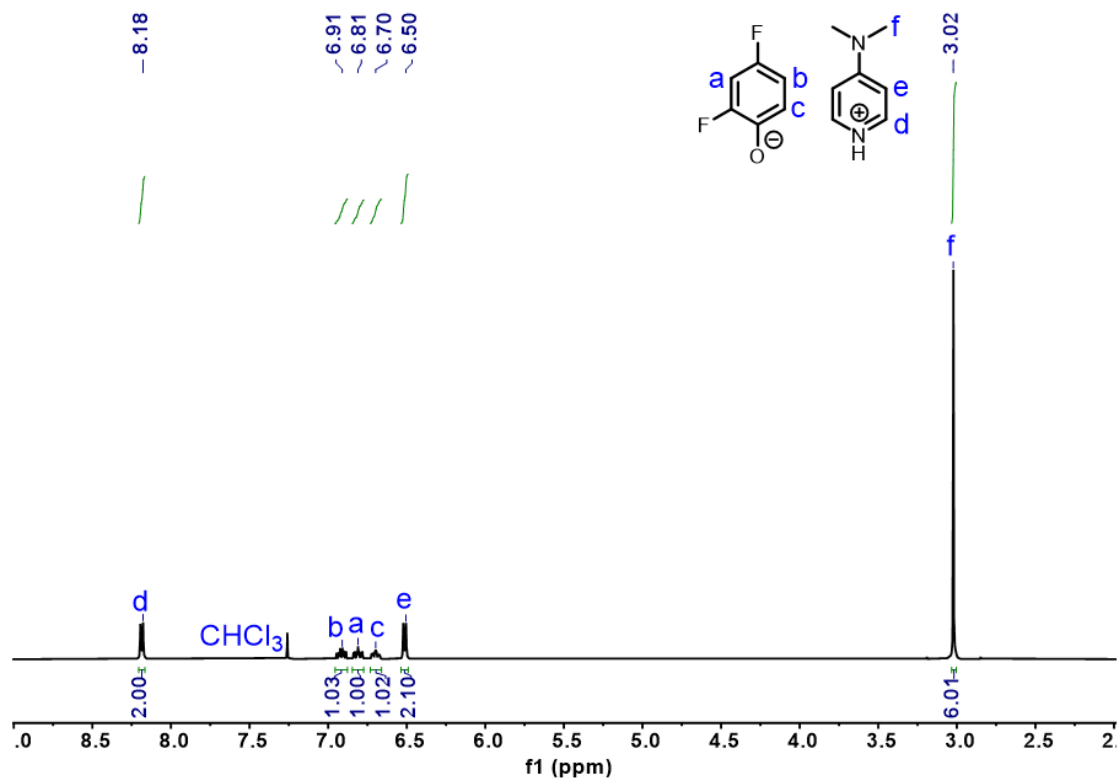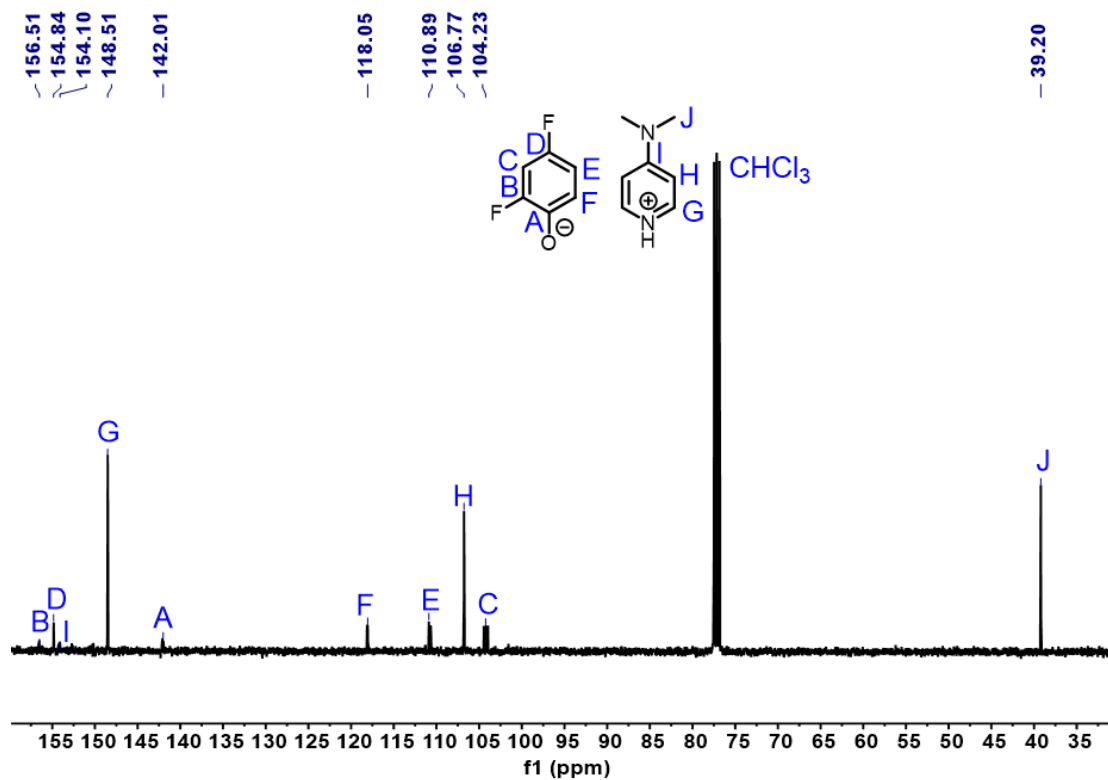

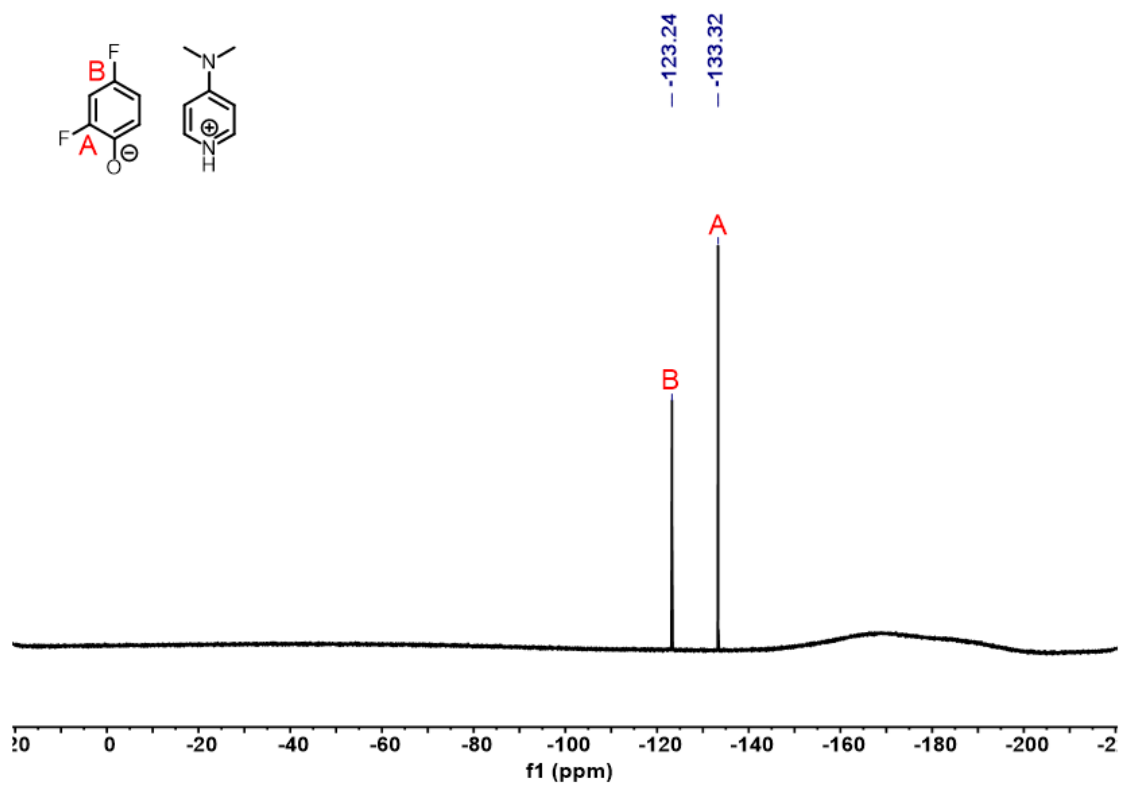

Figure S25.  $^{19}\text{F}$  NMR spectrum ( $\text{CDCl}_3$ , 376 MHz) of 2,4-FP/DMAP (e)

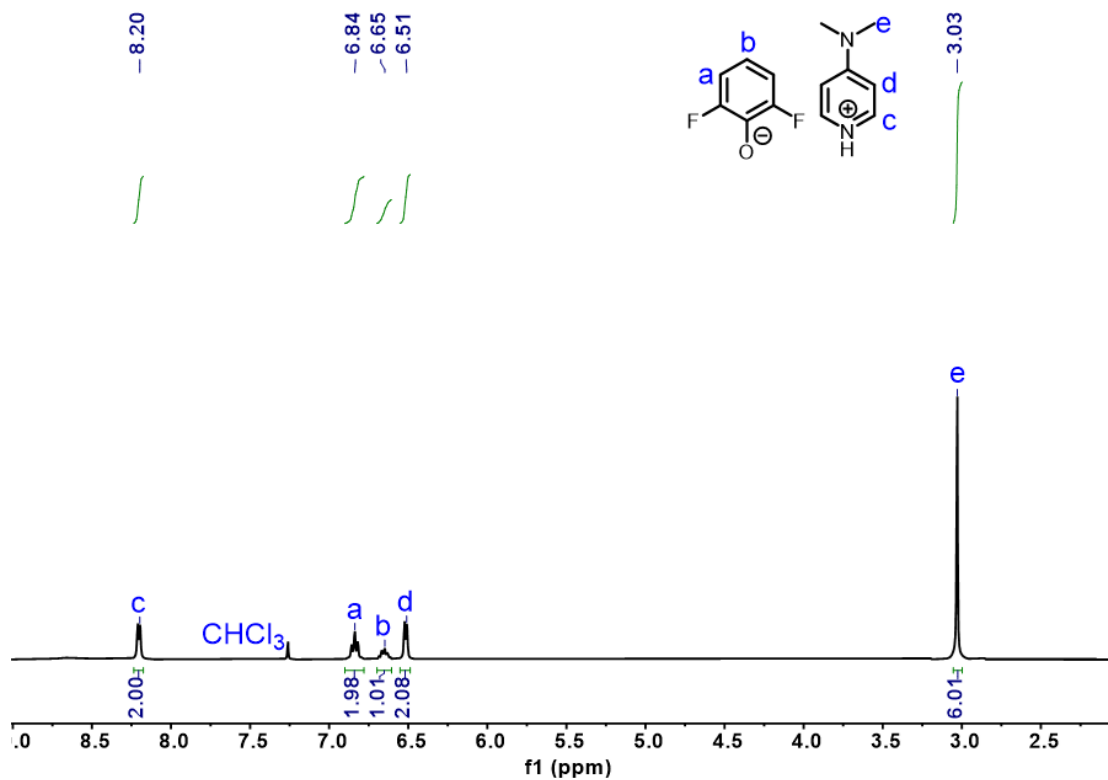

Figure S26.  $^1\text{H}$  NMR spectrum ( $\text{CDCl}_3$ , 400 MHz) of 2,6-FP/DMAP (f)

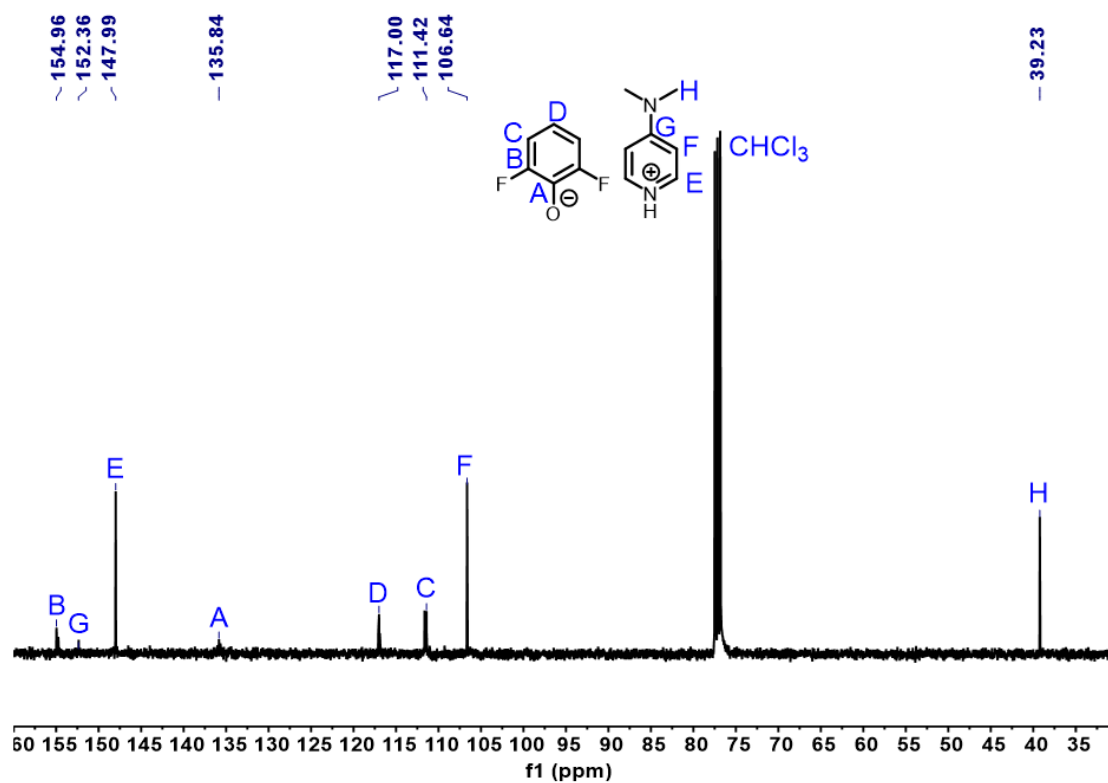

Figure S27. <sup>13</sup>C NMR spectrum (CDCl<sub>3</sub>, 101 MHz) of 2,6-FP/DMAP (f)

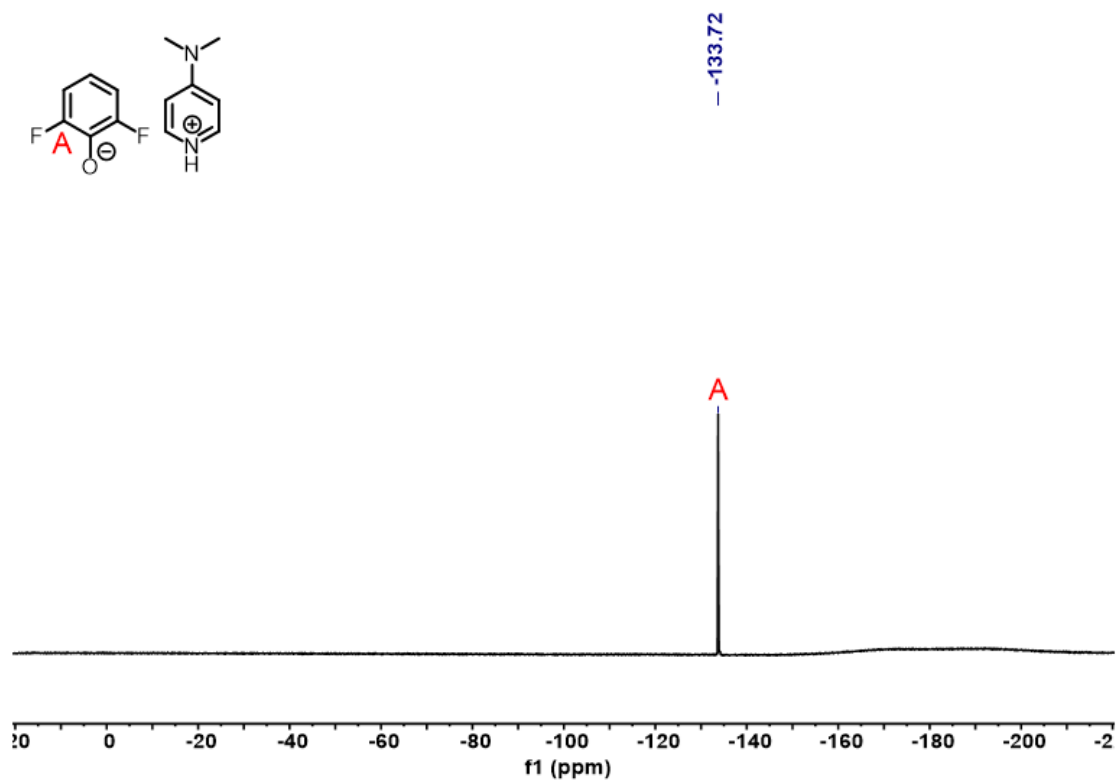

Figure S28. <sup>19</sup>F NMR spectrum (CDCl<sub>3</sub>, 376 MHz) of 2,6-FP/DMAP (f)

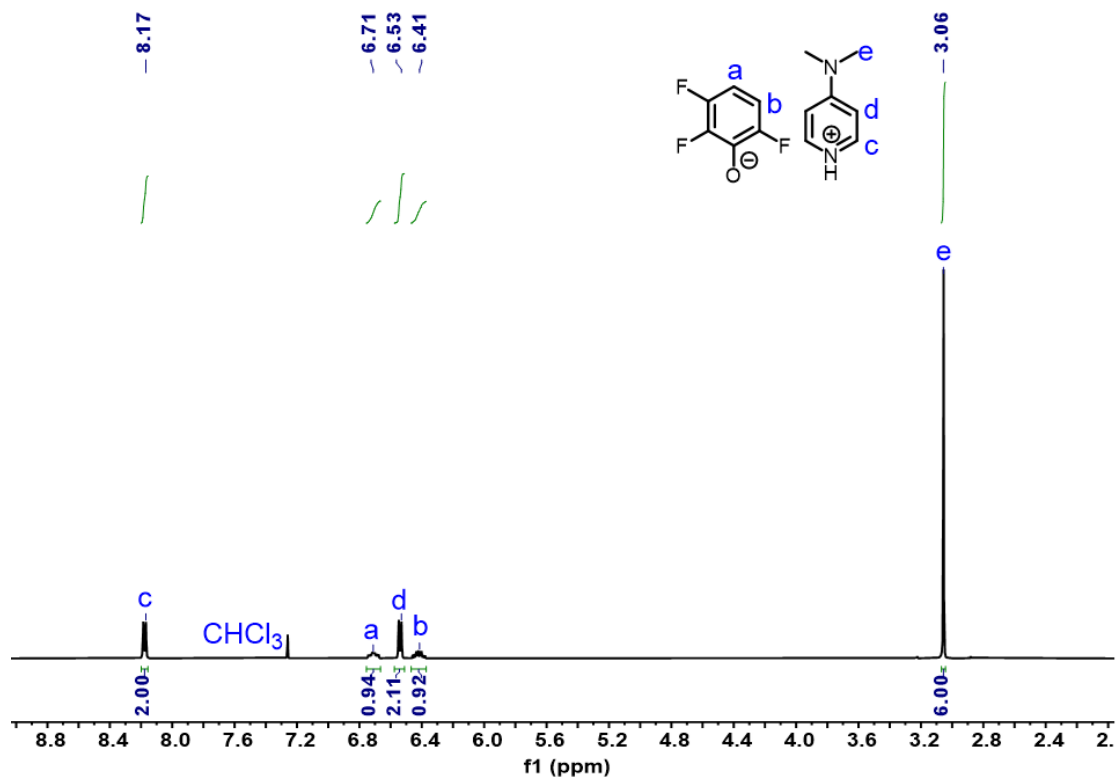

Figure S29.  $^1\text{H}$  NMR spectrum ( $\text{CDCl}_3$ , 400 MHz) of 2,3,6-FP/DMAP (g)

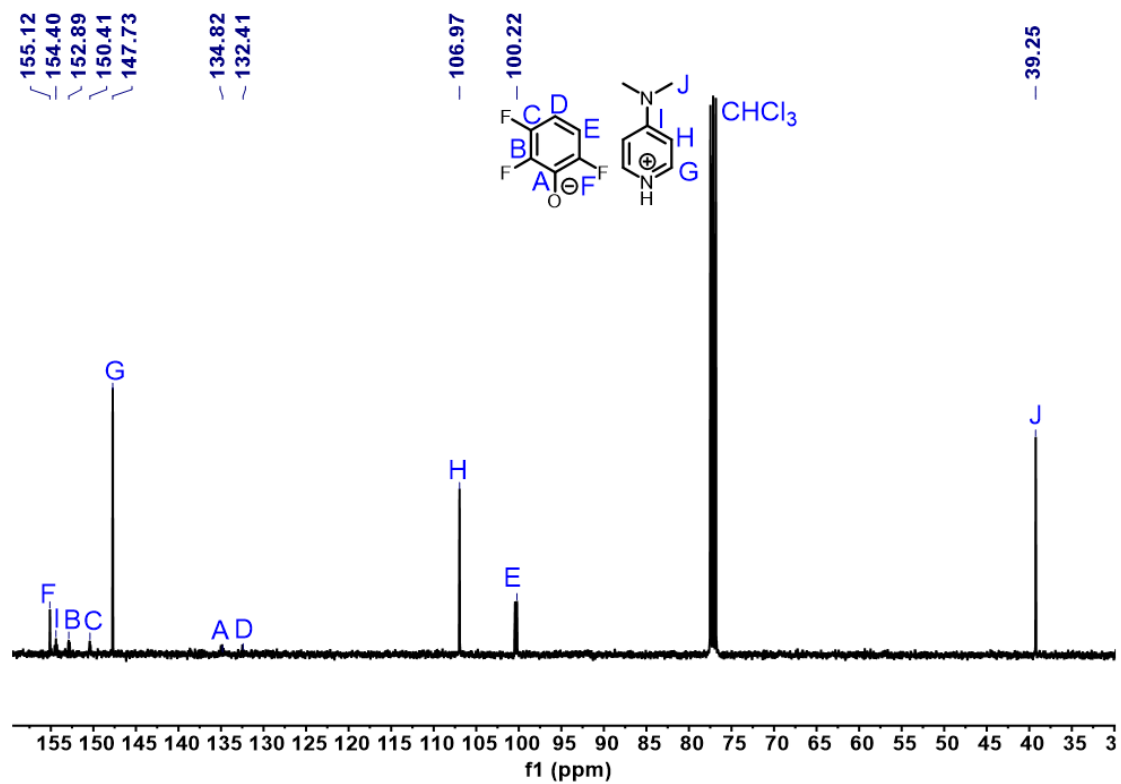

Figure S30.  $^{13}\text{C}$  NMR spectrum ( $\text{CDCl}_3$ , 101 MHz) of 2,3,6-FP/DMAP (g)

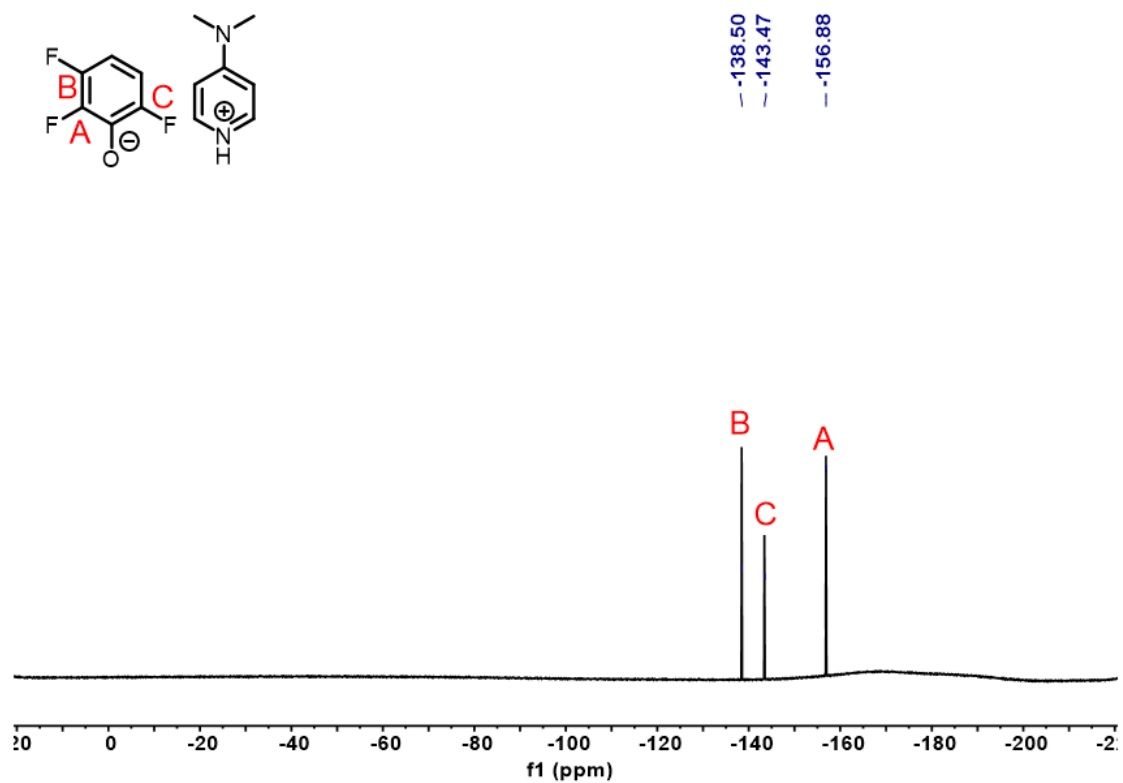

Figure S31.  $^{19}\text{F}$  NMR spectrum (CDCl<sub>3</sub>, 376 MHz) of 2,3,6-FP/DMAP (g)

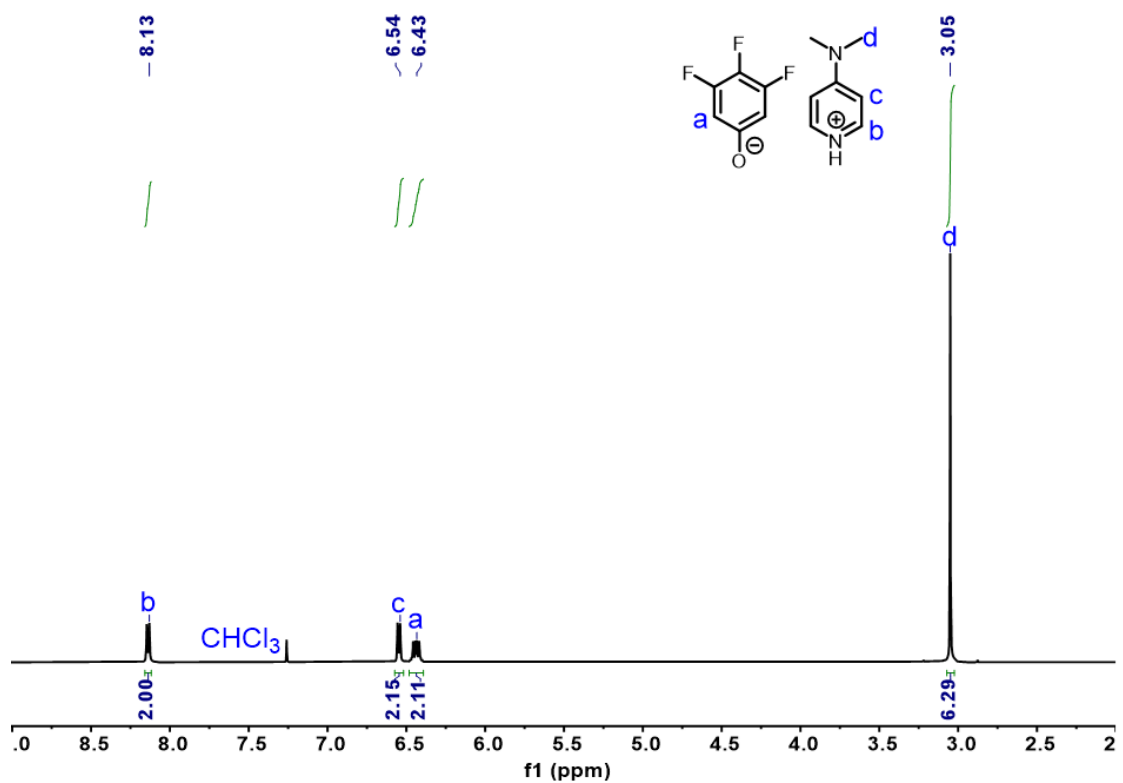

Figure S32.  $^1\text{H}$  NMR spectrum (CDCl<sub>3</sub>, 400 MHz) of 3,4,5-FP/DMAP (h)

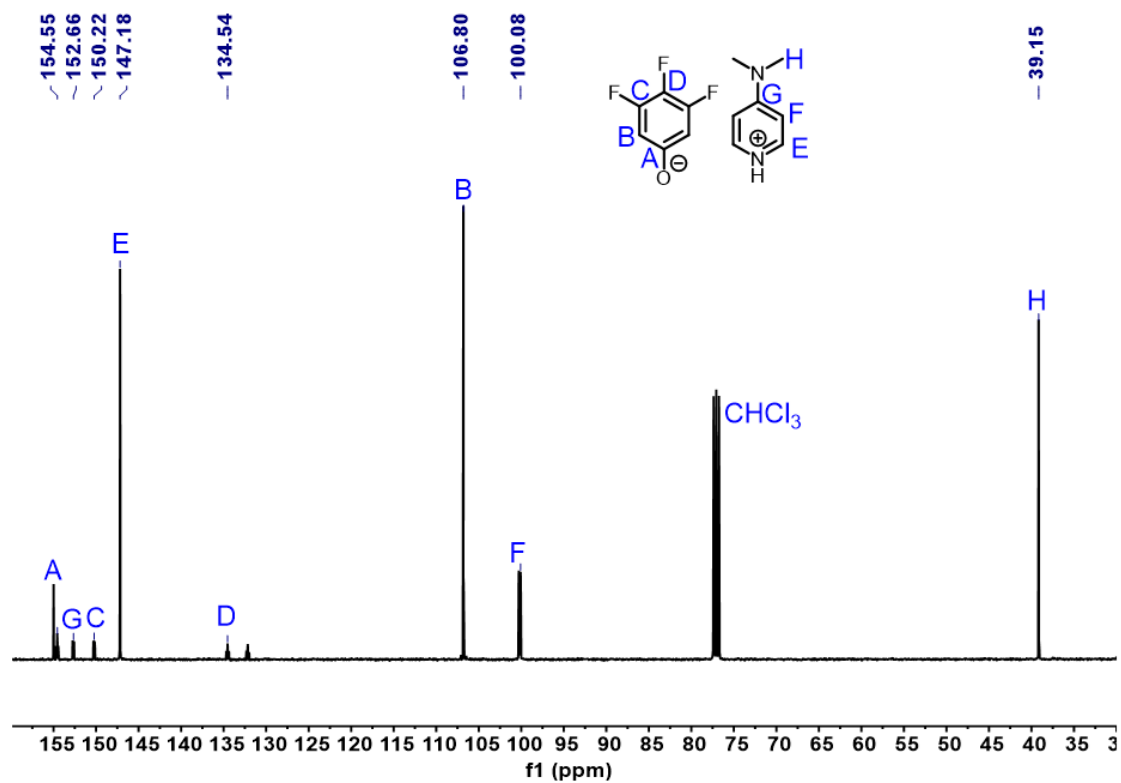

Figure S33. <sup>13</sup>C NMR spectrum (CDCl<sub>3</sub>, 101 MHz) of 3,4,5-FP/DMAP (h)

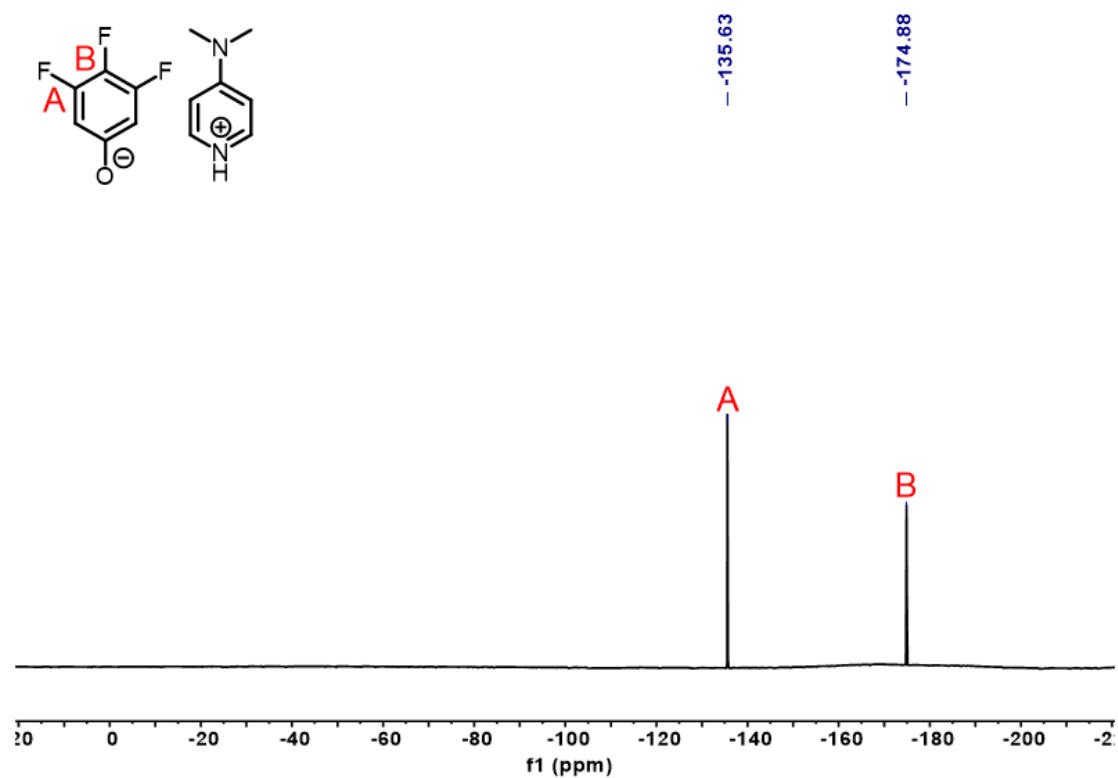

Figure S34. <sup>19</sup>F NMR spectrum (CDCl<sub>3</sub>, 376 MHz) of 3,4,5-FP/DMAP (h)

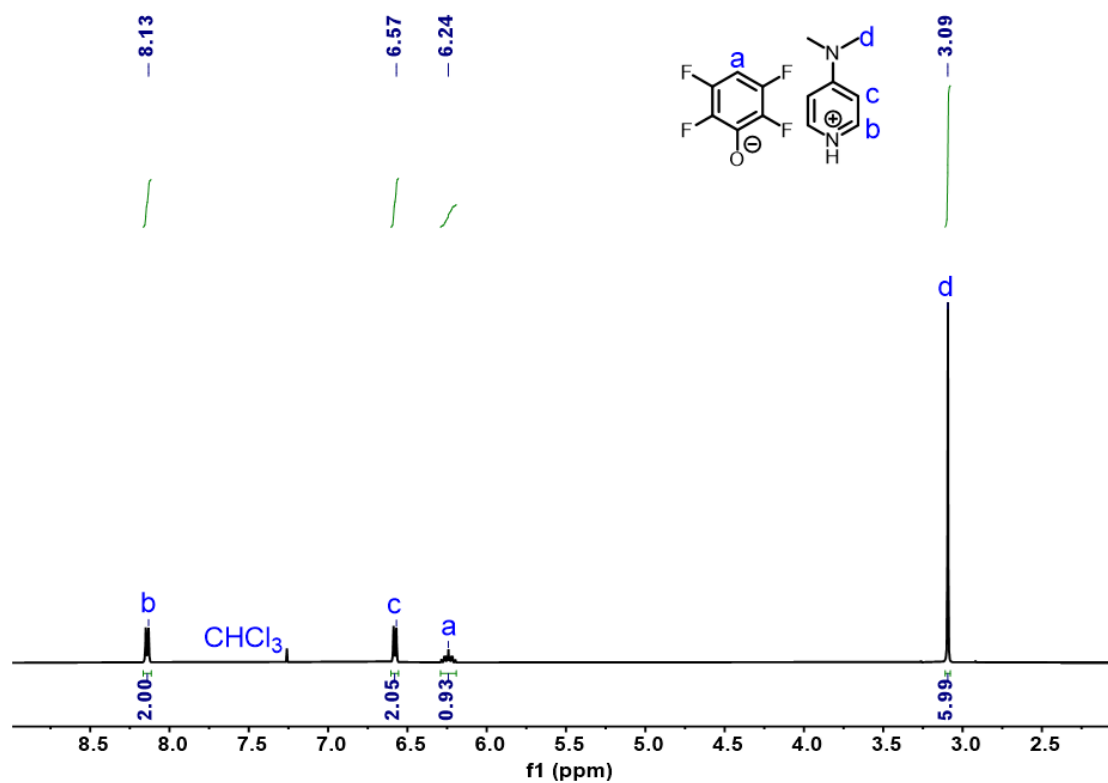

Figure S35.  $^1\text{H}$  NMR spectrum ( $\text{CDCl}_3$ , 400 MHz) of 2,3,5,6-FP/DMAP (i)

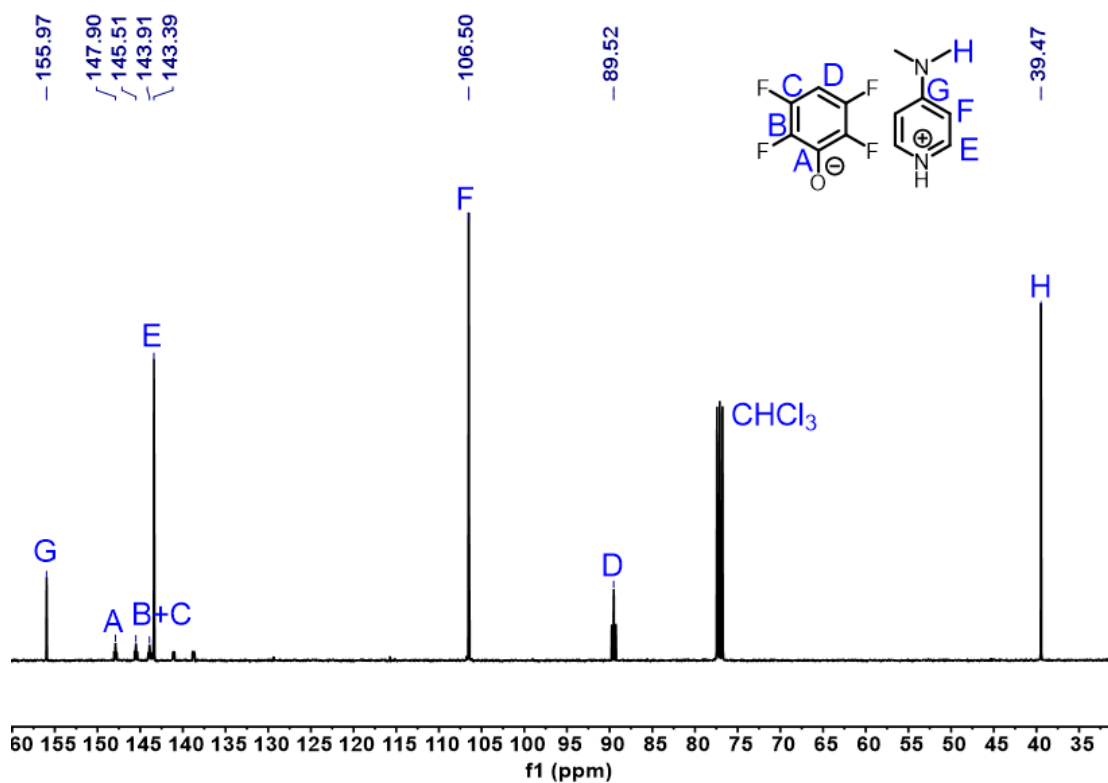

Figure S36.  $^{13}\text{C}$  NMR spectrum ( $\text{CDCl}_3$ , 101 MHz) of 2,3,5,6-FP/DMAP (i)

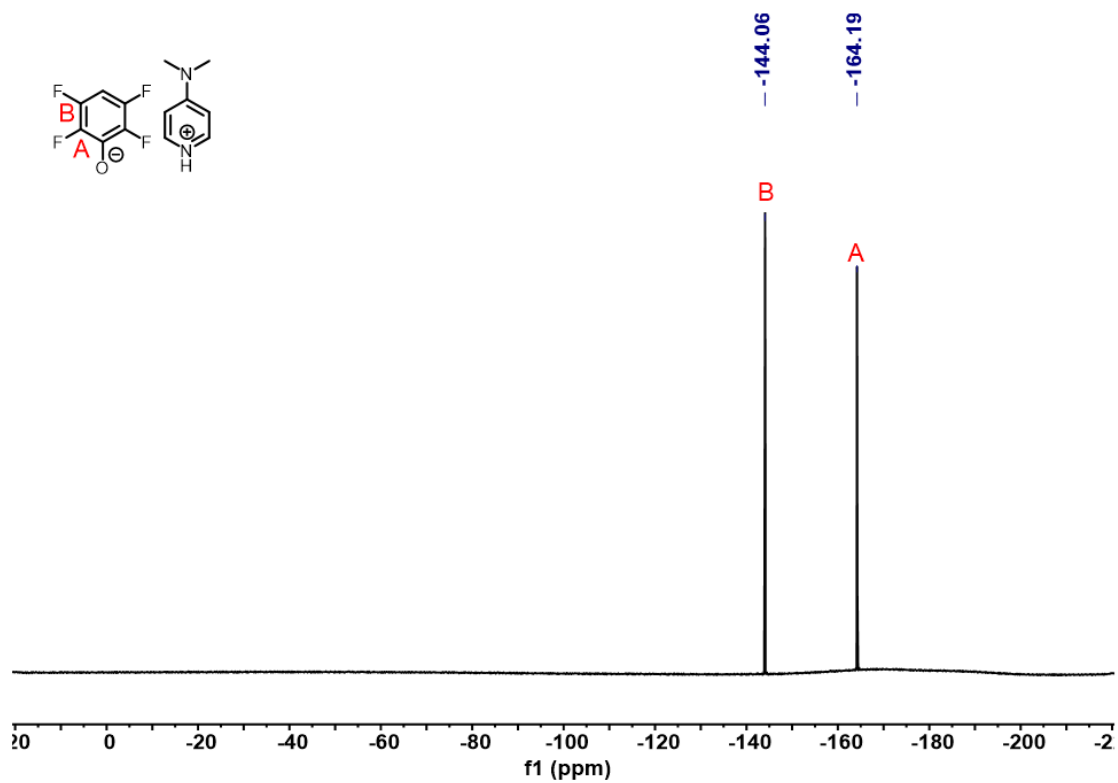

Figure S37.  $^{19}\text{F}$  NMR spectrum ( $\text{CDCl}_3$ , 376 MHz) of 2,3,5,6-FP/DMAP (i)

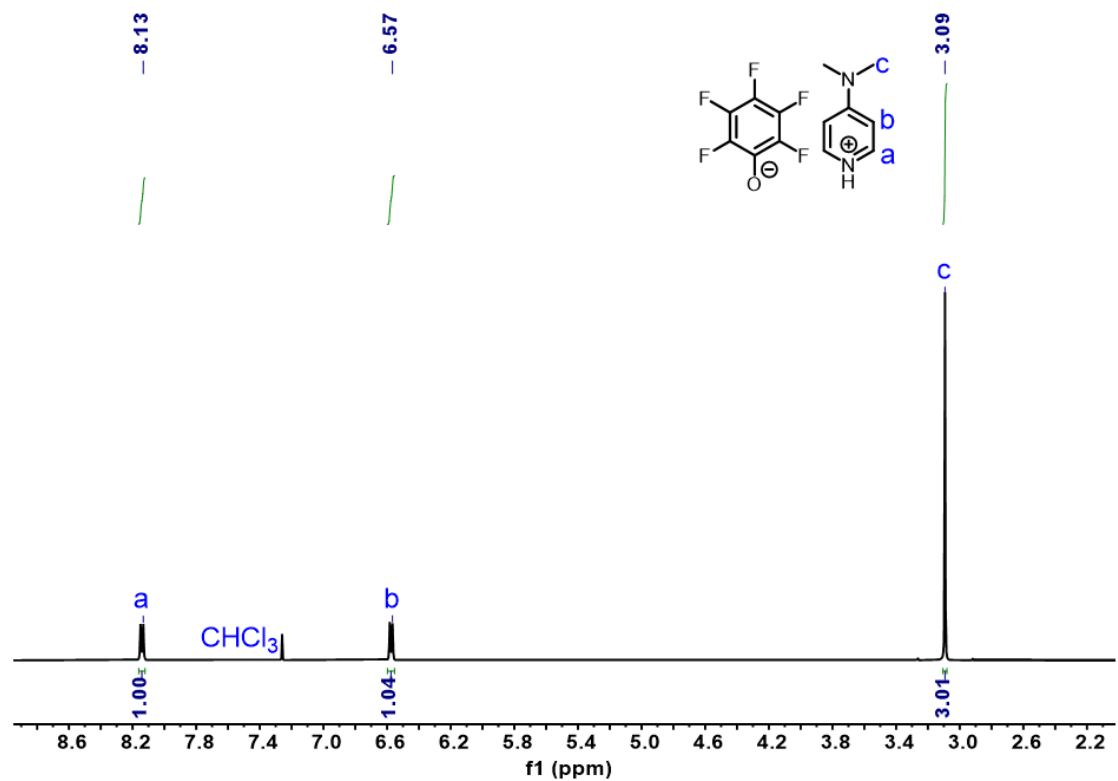

Figure S38.  $^1\text{H}$  NMR spectrum ( $\text{CDCl}_3$ , 400 MHz) of 2,3,4,5,6-FP/DMAP (j)



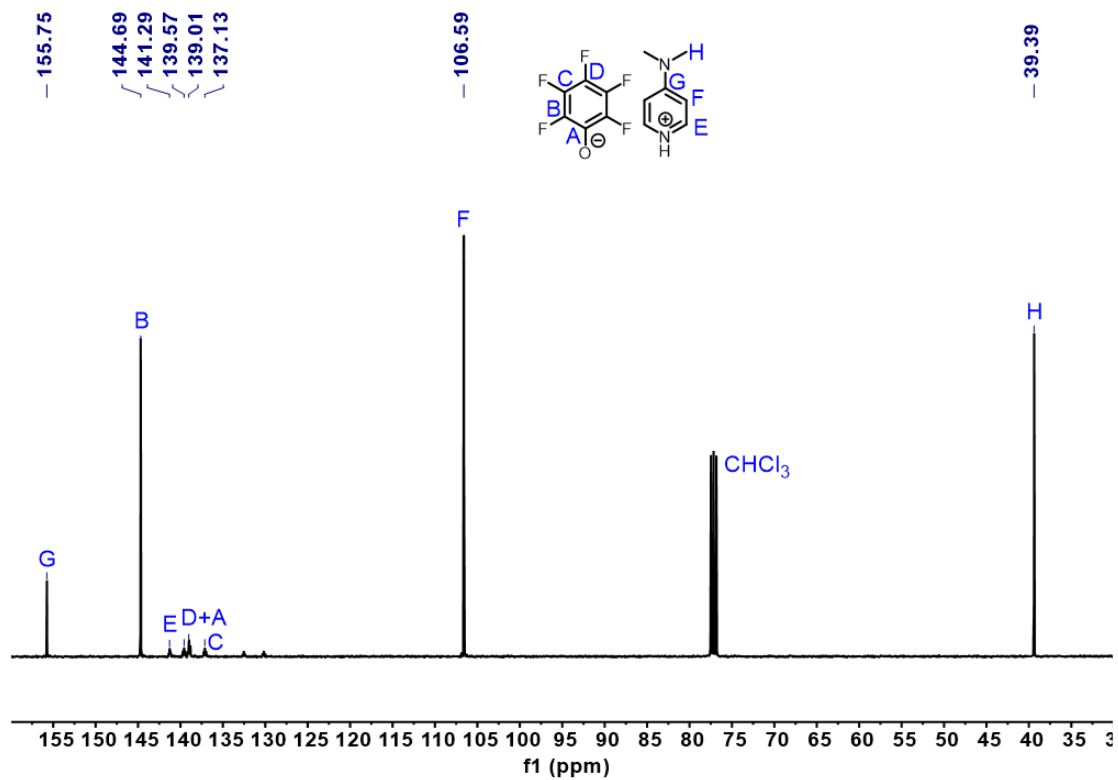

Figure S39. <sup>13</sup>C NMR spectrum (CDCl<sub>3</sub>, 101 MHz) of 2,3,4,5,6-FP/DMAP (j)

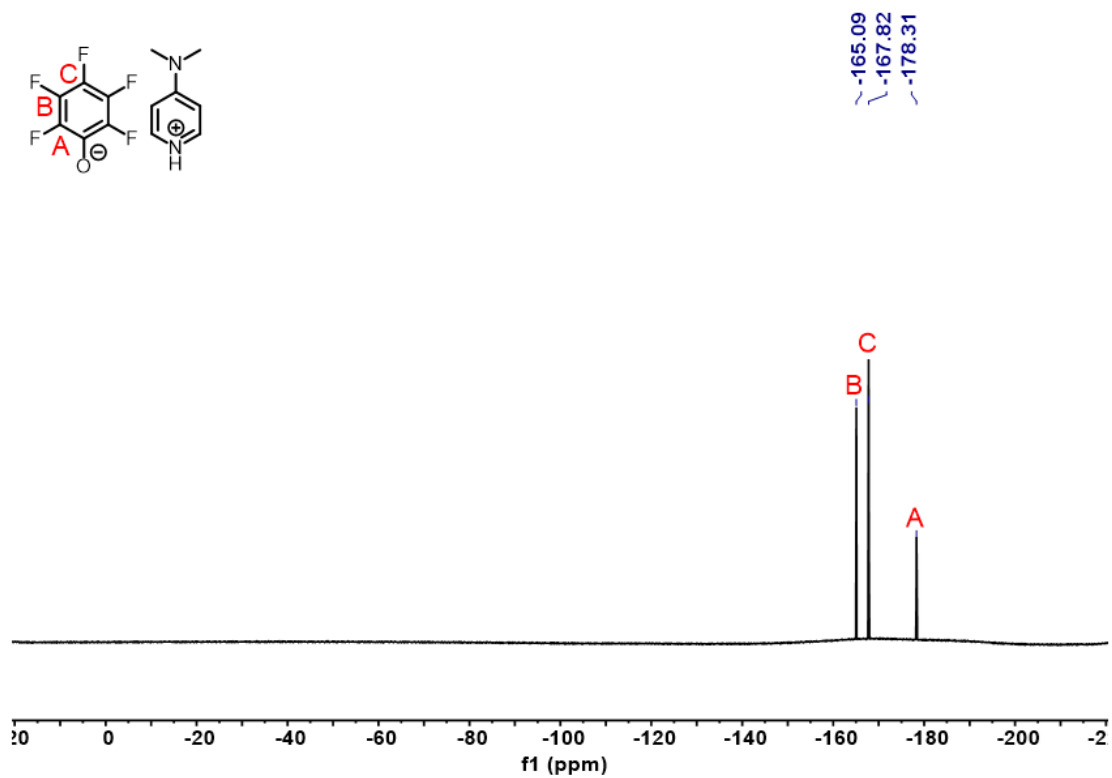

Figure S40. <sup>19</sup>F NMR spectrum (CDCl<sub>3</sub>, 376 MHz) of 2,3,4,5,6-FP/DMAP (j)

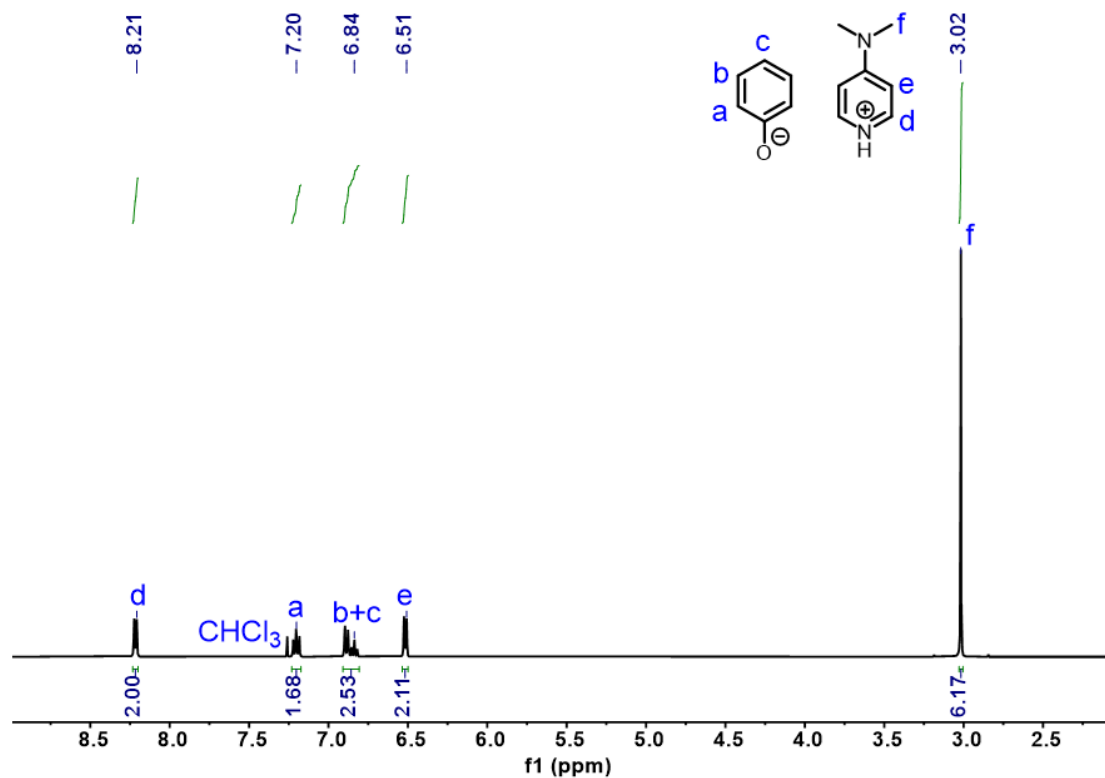

Figure S41.  $^1\text{H}$  NMR spectrum ( $\text{CDCl}_3$ , 400 MHz) of Ph/DMAP (k)

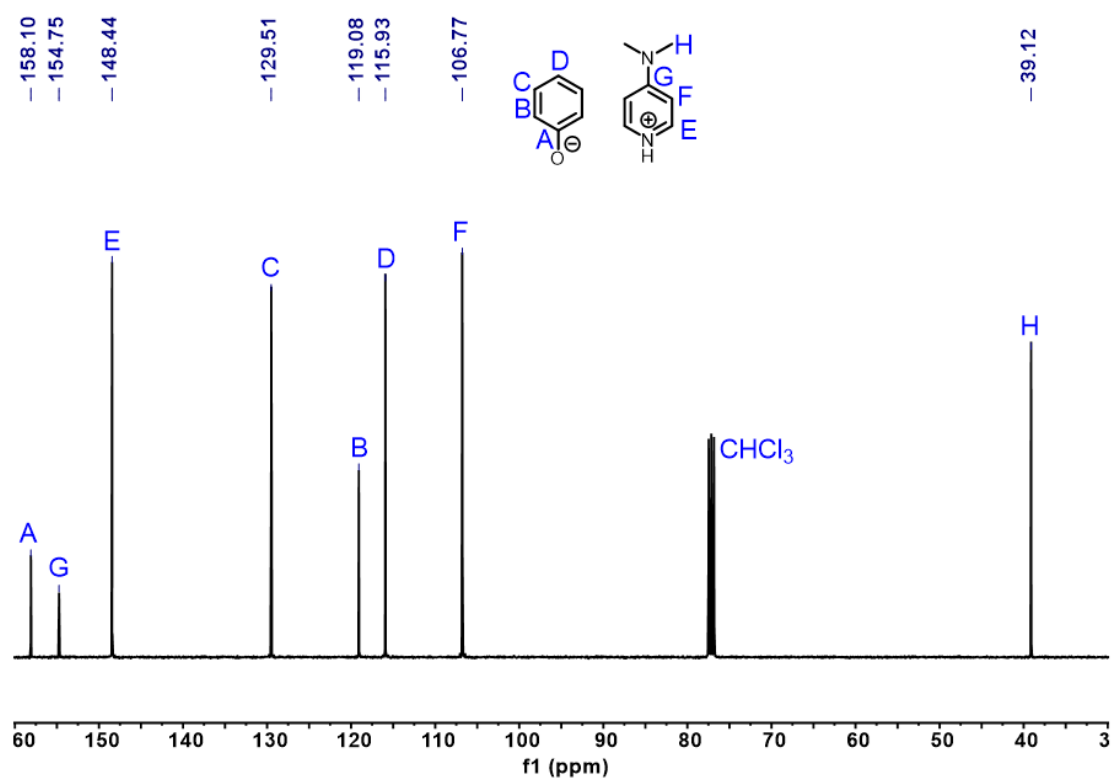

Figure S42.  $^{13}\text{C}$  NMR spectrum ( $\text{CDCl}_3$ , 101 MHz) of Ph/DMAP (k)

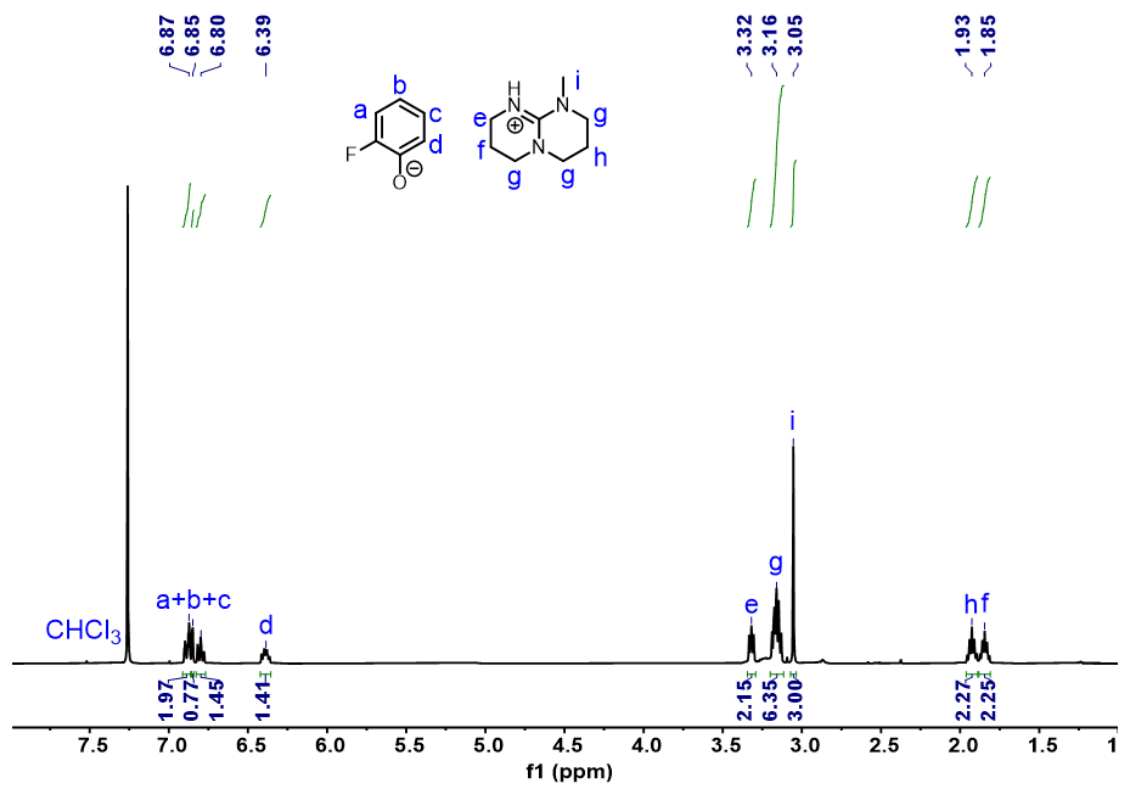

Figure S43. <sup>1</sup>H NMR spectrum (CDCl<sub>3</sub>, 400 MHz) of *o*-FP/MTBD (a')

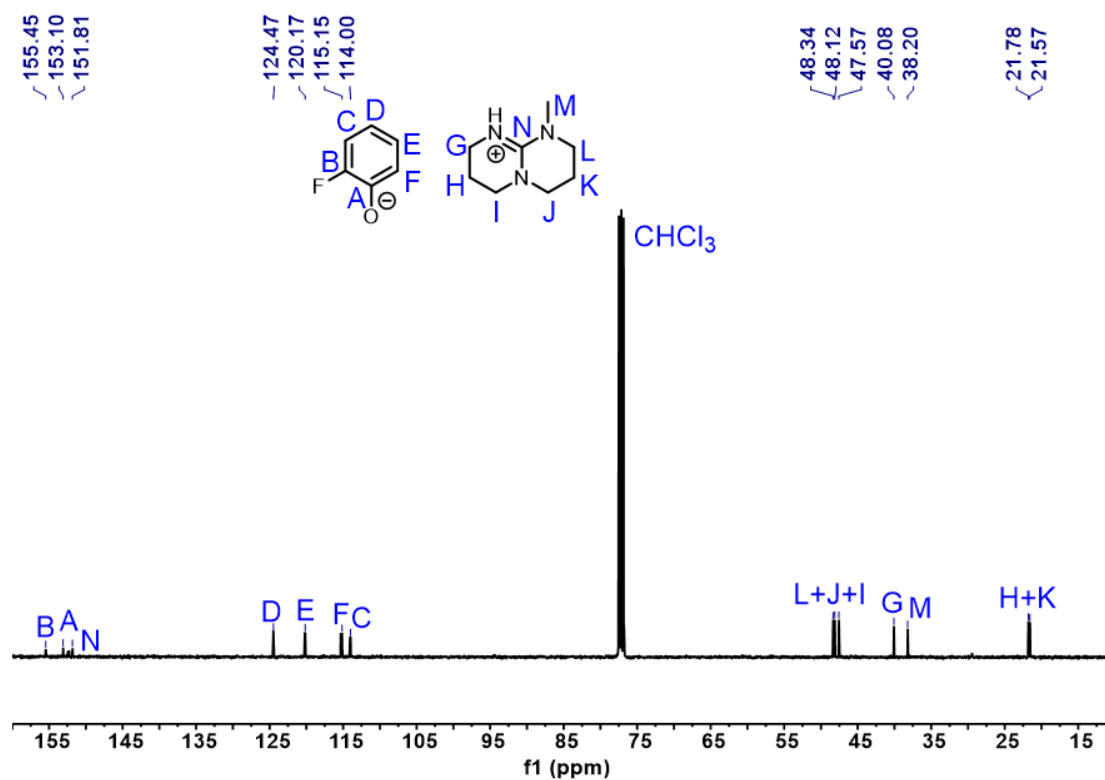

Figure S44. <sup>13</sup>C NMR spectrum (CDCl<sub>3</sub>, 101 MHz) of *o*-FP/MTBD (a')

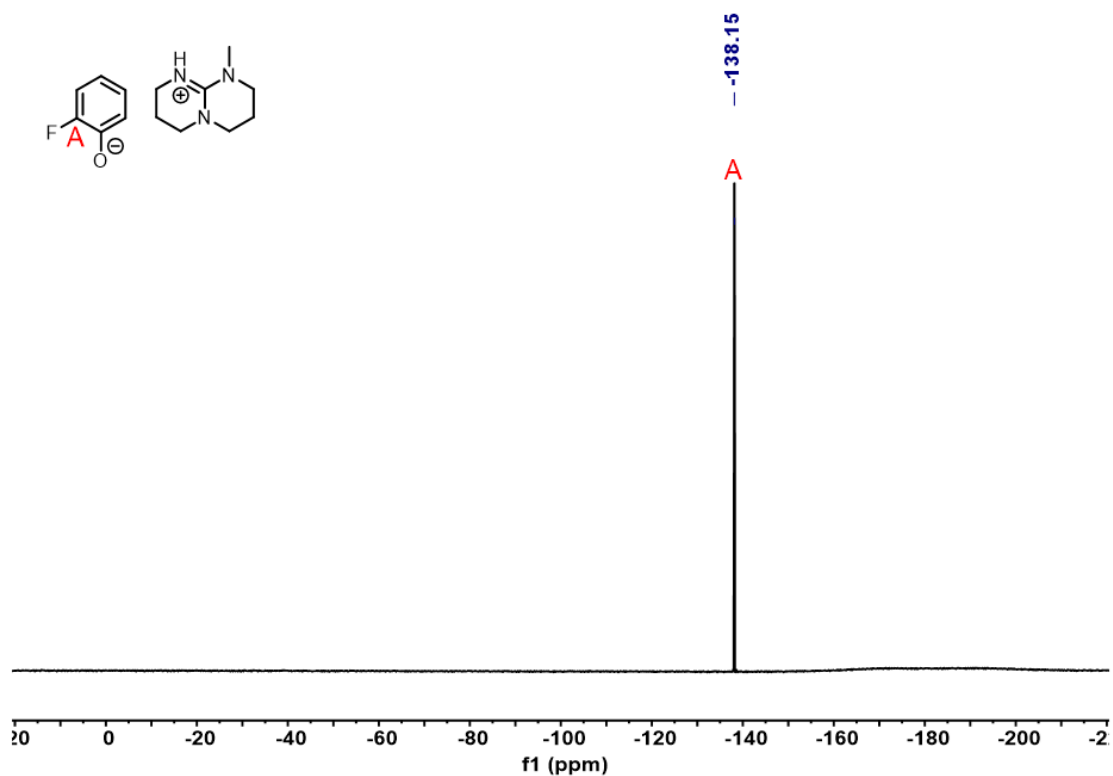

Figure S45.  $^{19}\text{F}$  NMR spectrum ( $\text{CDCl}_3$ , 376 MHz) of *o*-FP/MTBD (a')

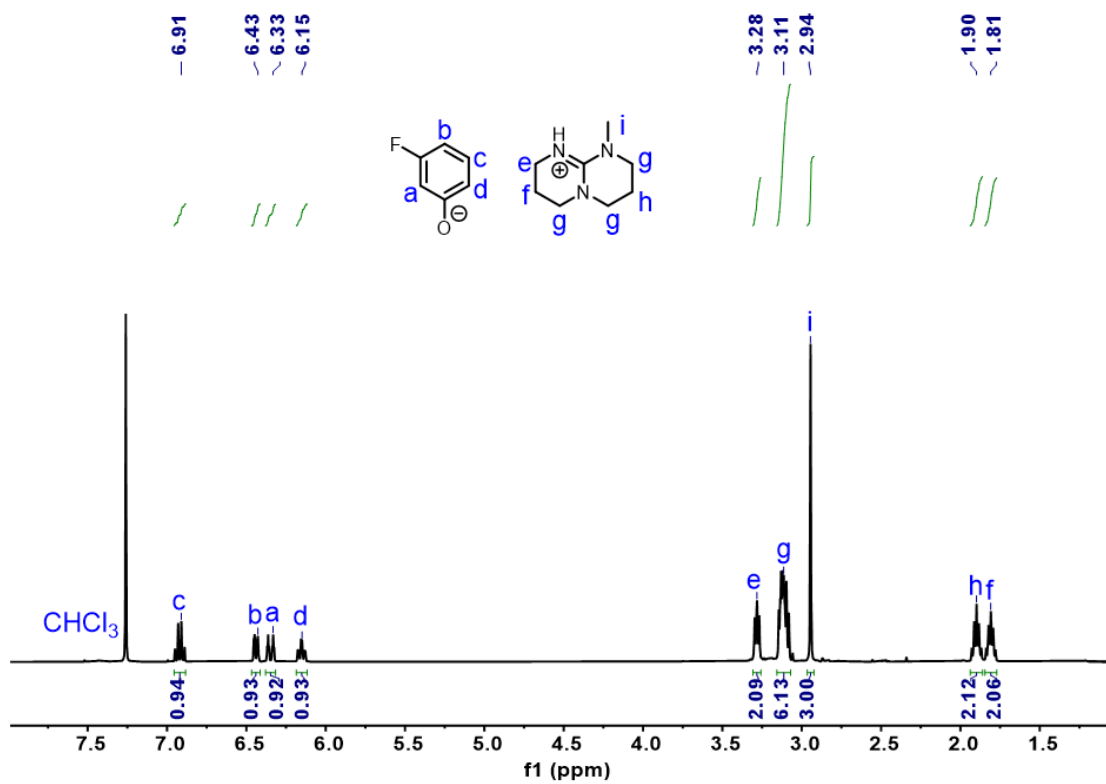

Figure S46.  $^1\text{H}$  NMR spectrum ( $\text{CDCl}_3$ , 400 MHz) of *m*-FP/MTBD (b')

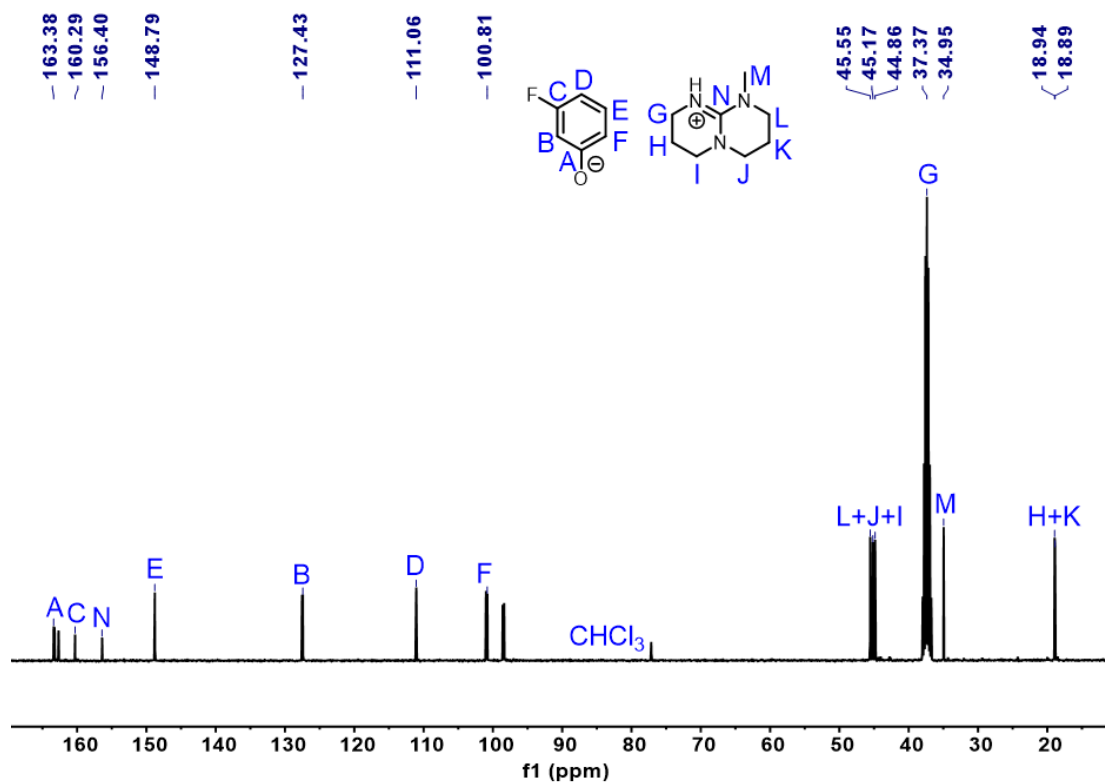

Figure S47. <sup>13</sup>C NMR spectrum (CDCl<sub>3</sub>, 101 MHz) of *m*-FP/MTBD (b')

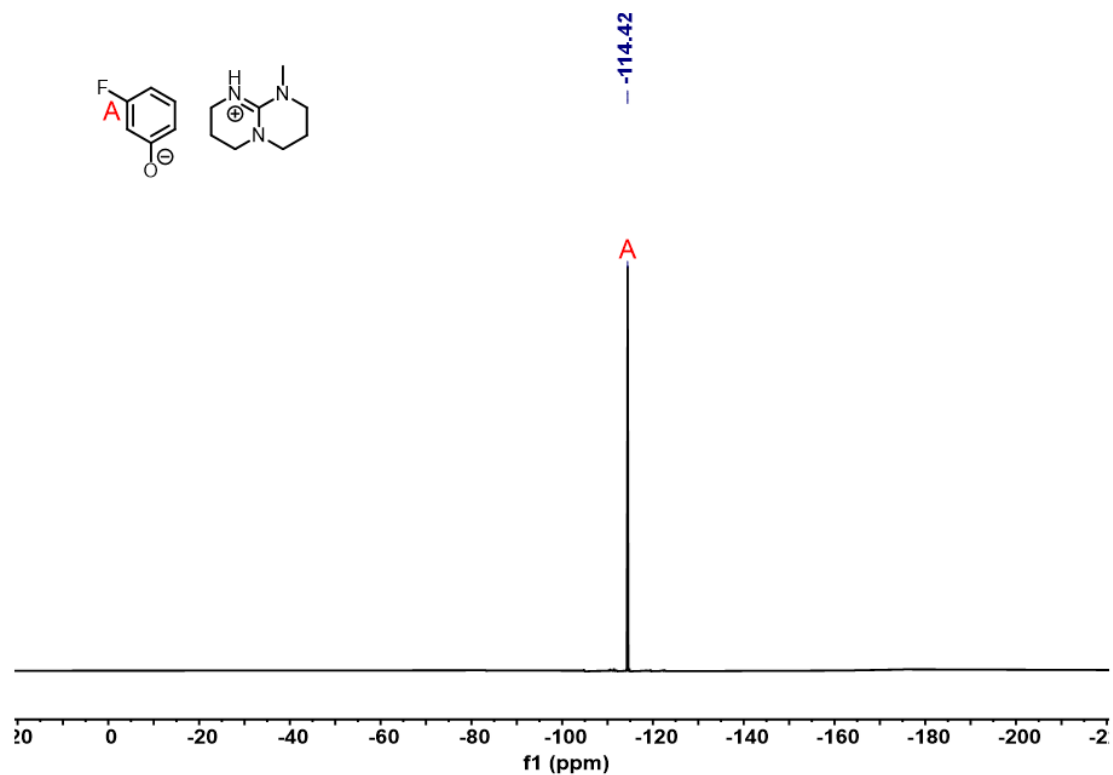

Figure S48. <sup>19</sup>F NMR spectrum (CDCl<sub>3</sub>, 376 MHz) of *m*-FP/MTBD (b')

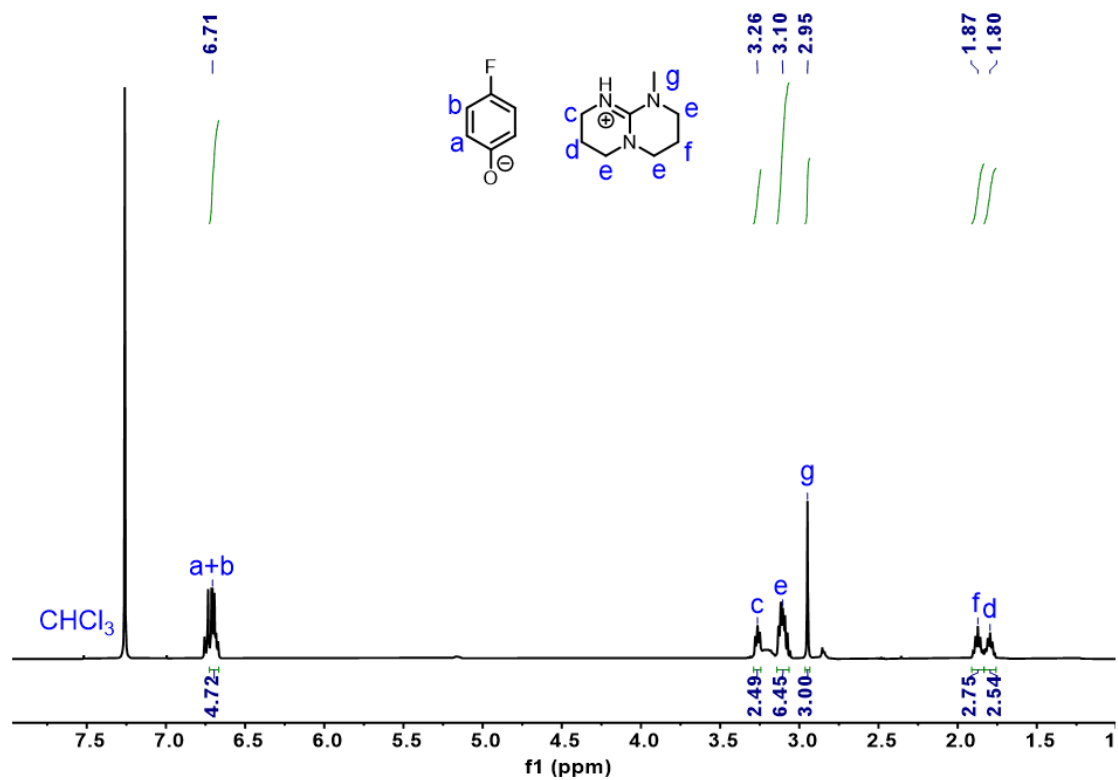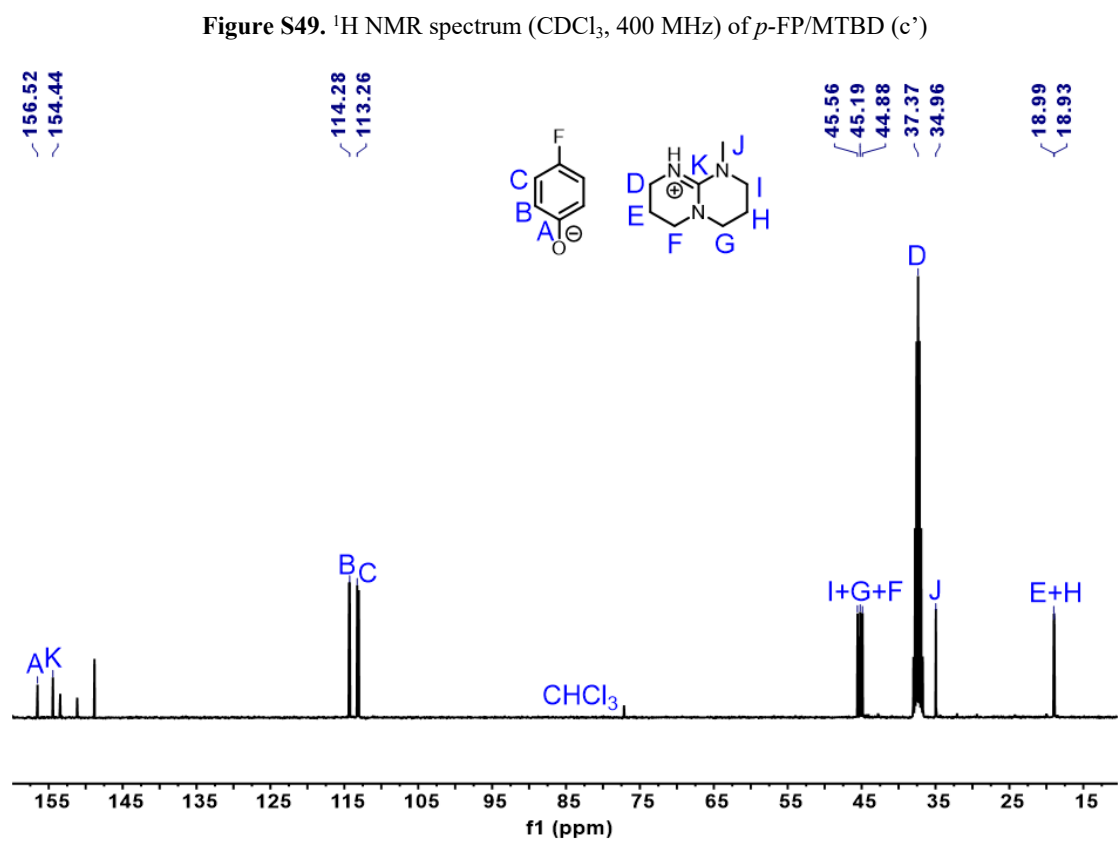

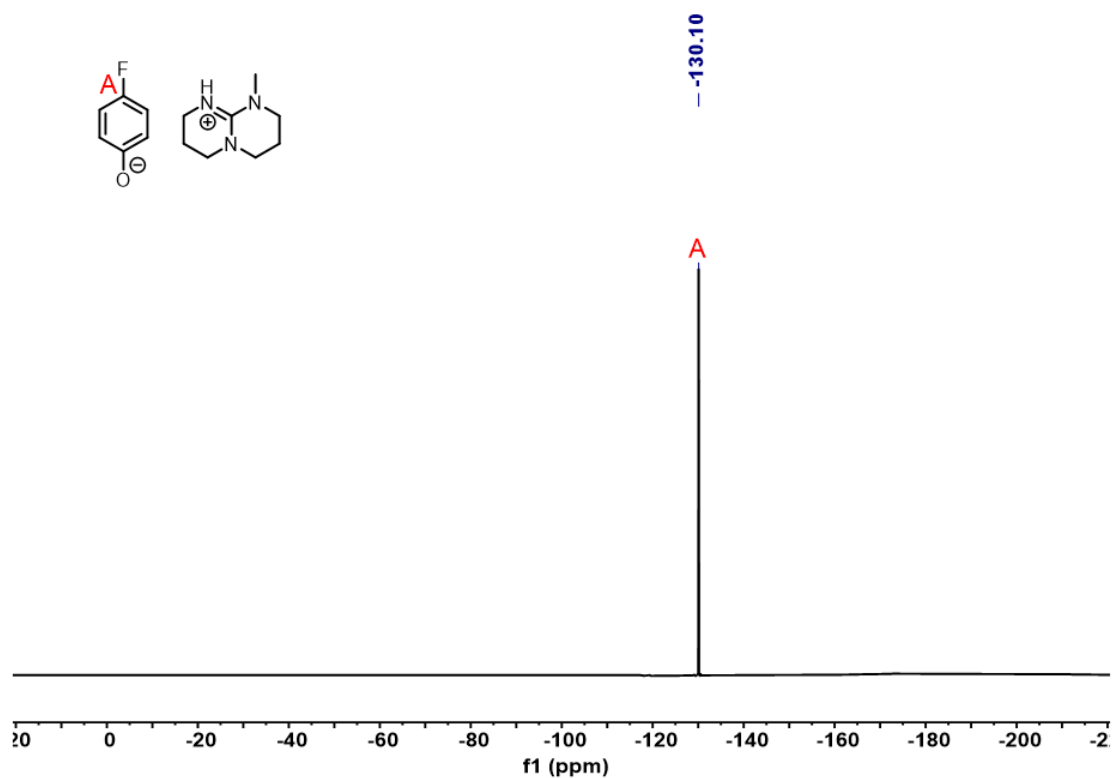

Figure S51.  $^{19}\text{F}$  NMR spectrum ( $\text{CDCl}_3$ , 376 MHz) of *p*-FP/MTBD (c')

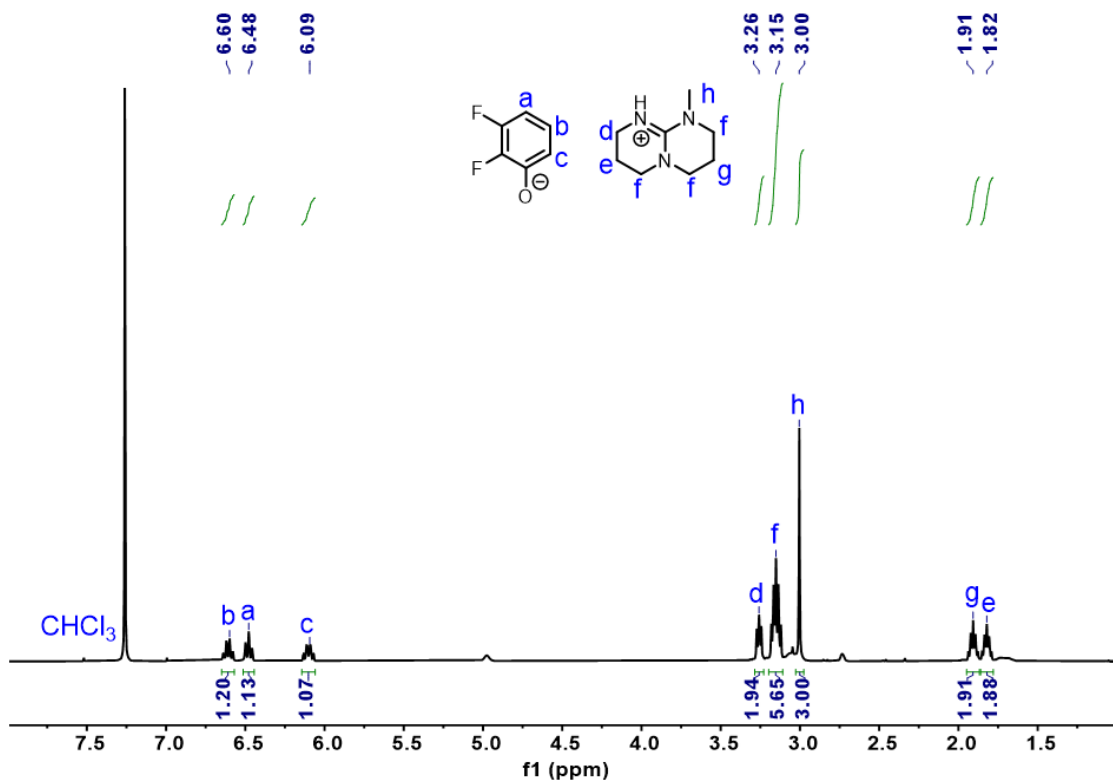

Figure S52.  $^1\text{H}$  NMR spectrum ( $\text{CDCl}_3$ , 400 MHz) of 2,3-FP/MTBD (d')

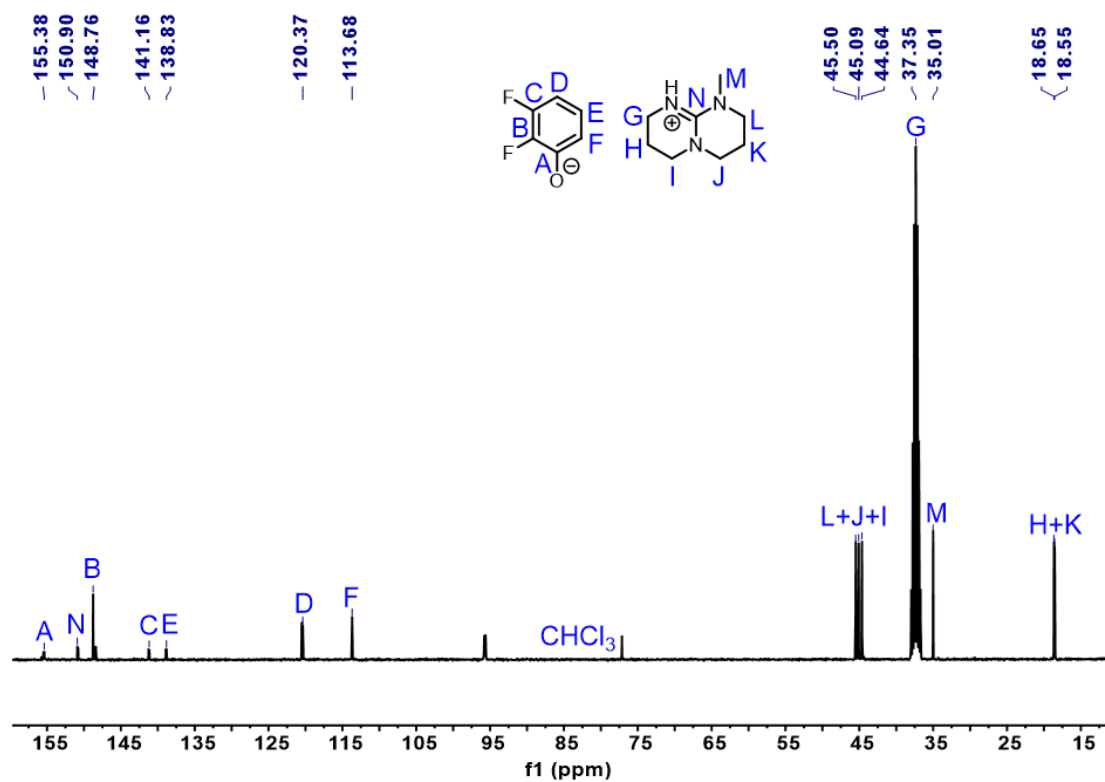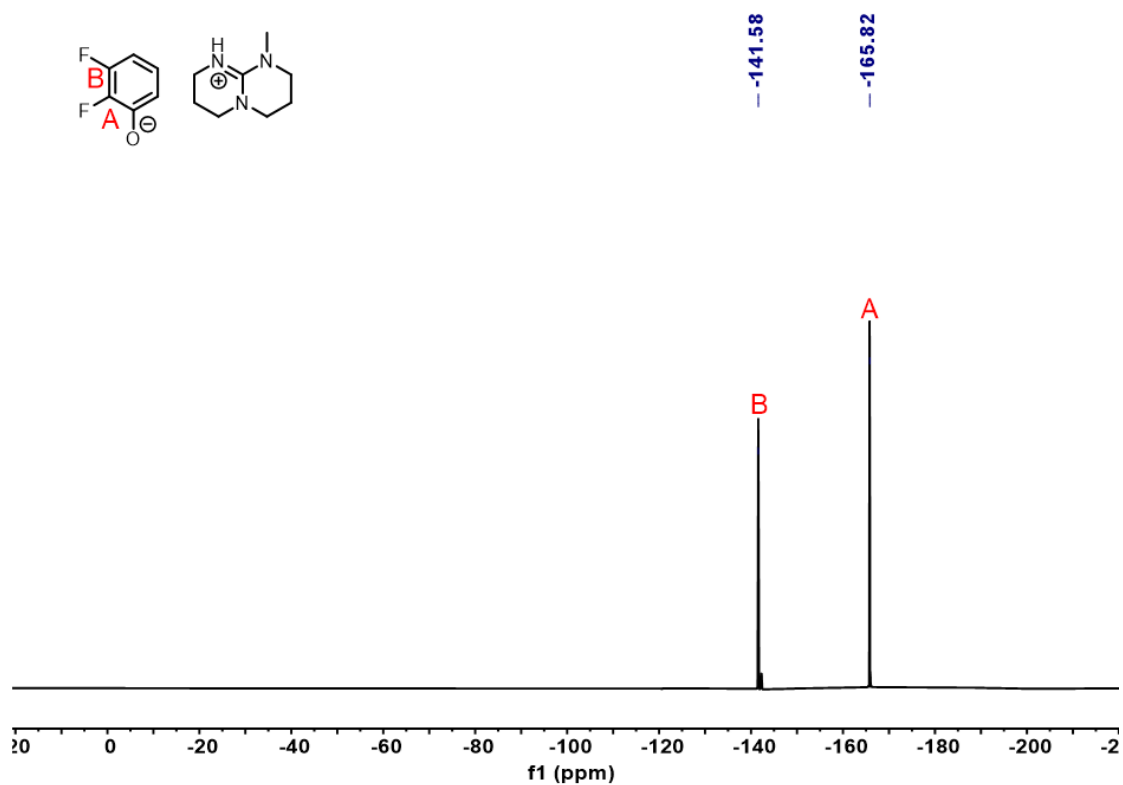



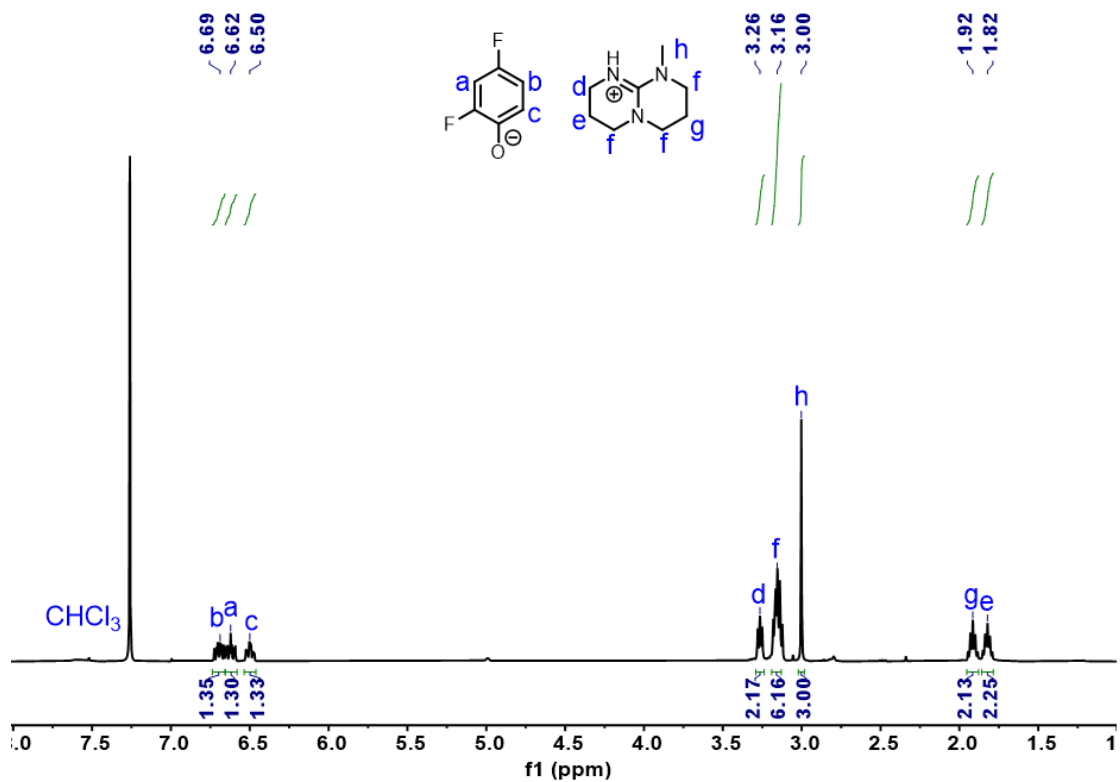

Figure S55.  $^1\text{H}$  NMR spectrum ( $\text{CDCl}_3$ , 400 MHz) of 2,4-FP/MTBD (e')

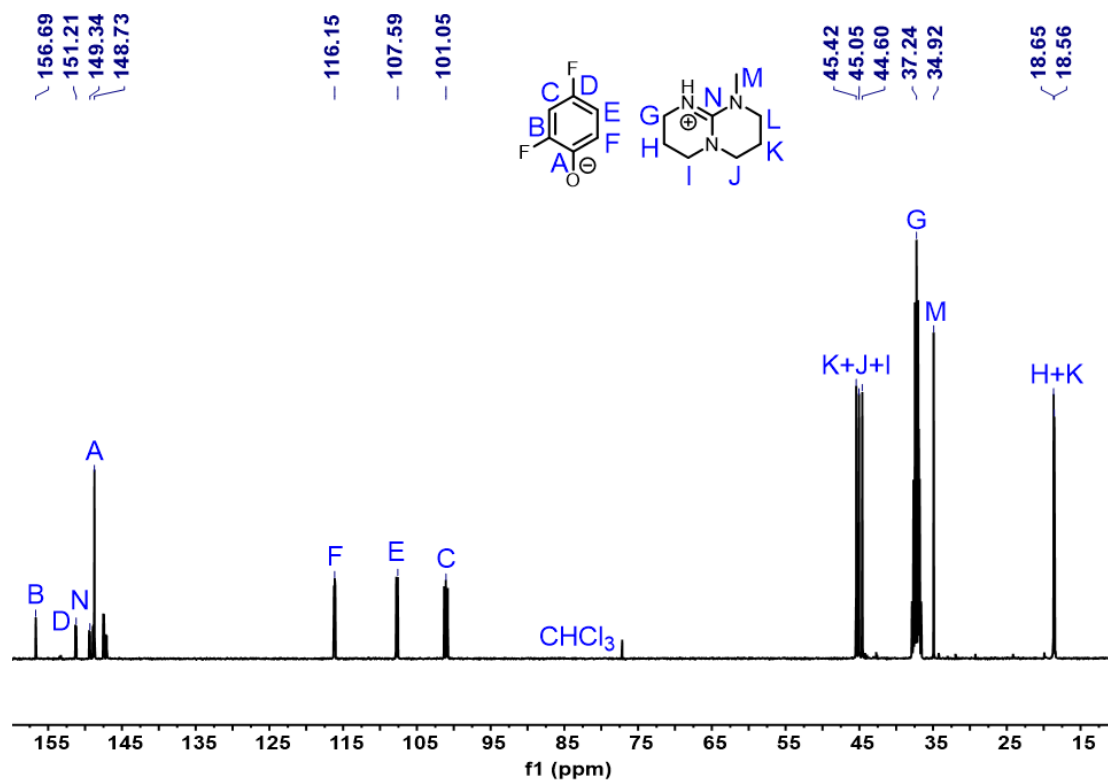

Figure S56.  $^{13}\text{C}$  NMR spectrum ( $\text{CDCl}_3$ , 101 MHz) of 2,4-FP/MTBD (e')

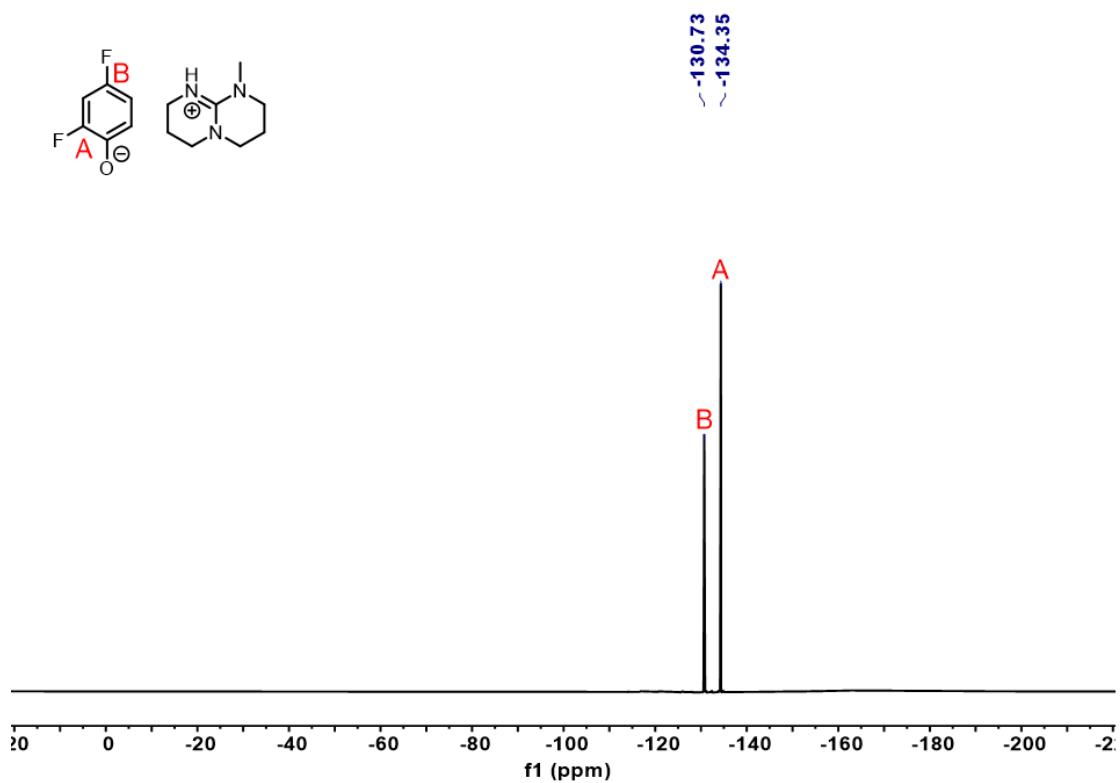

Figure S57.  $^{19}\text{F}$  NMR spectrum ( $\text{CDCl}_3$ , 376 MHz) of 2,4-FP/MTBD ( $e'$ )

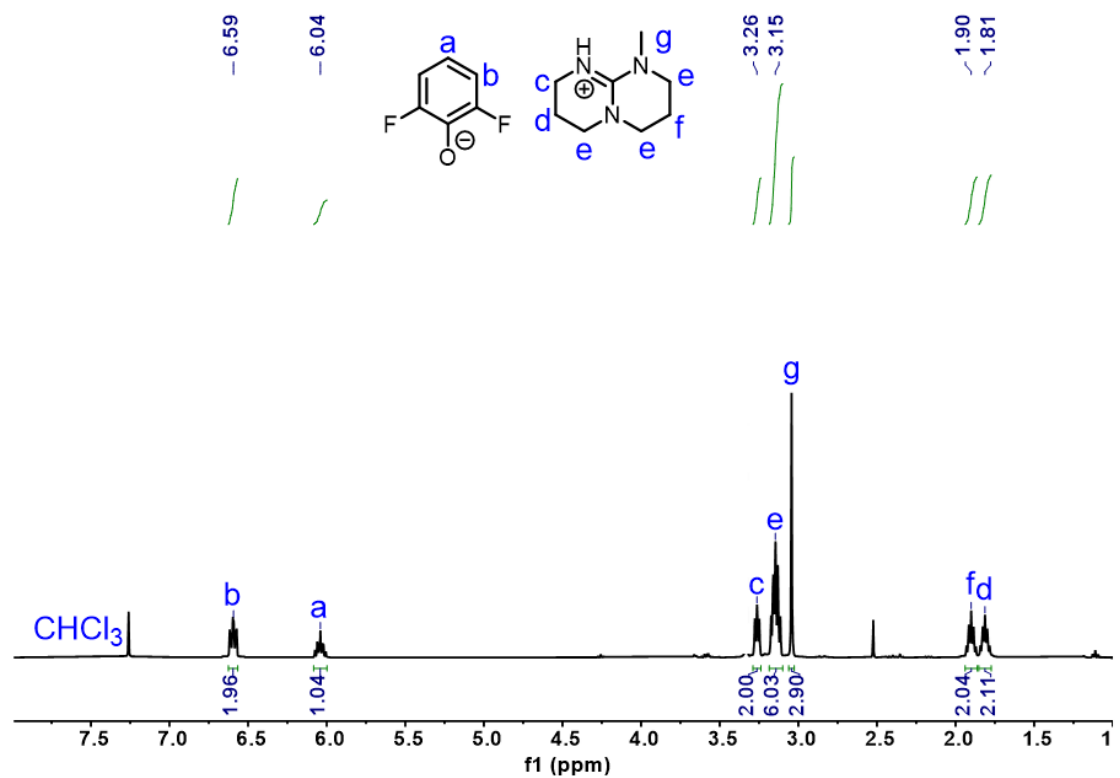

Figure S58.  $^1\text{H}$  NMR spectrum ( $\text{CDCl}_3$ , 400 MHz) of 2,6-FP/MTBD ( $f'$ )

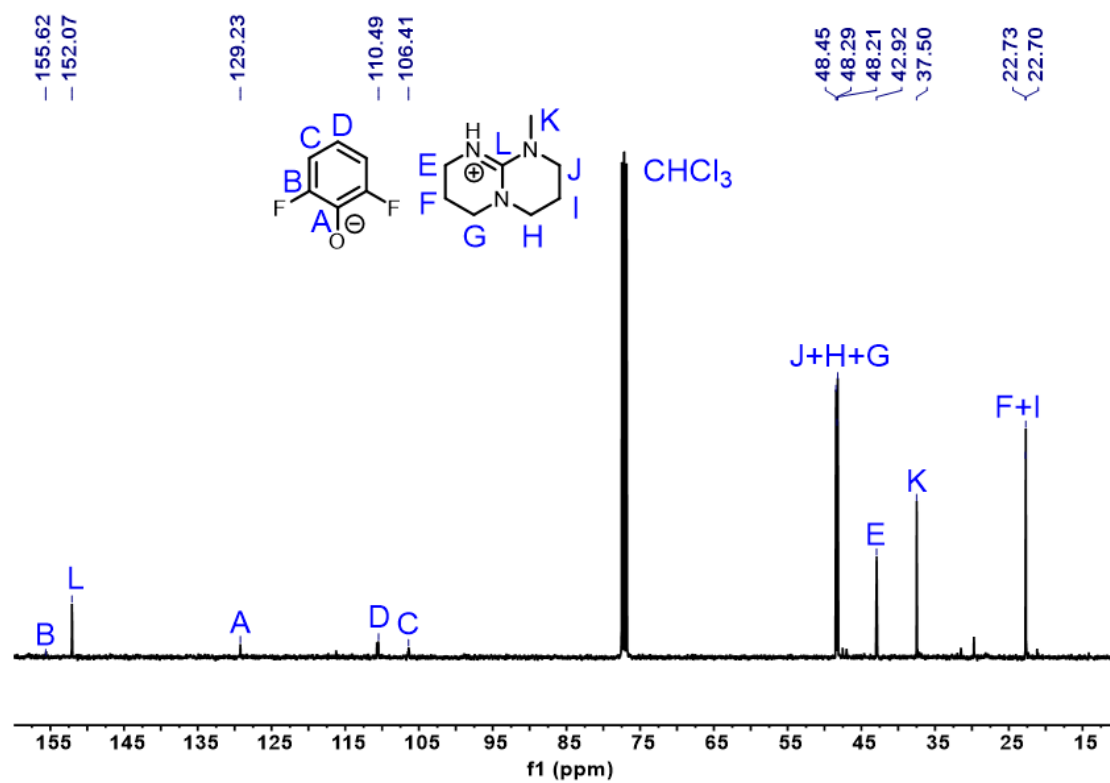

Figure S59.  $^{13}\text{C}$  NMR spectrum (CDCl<sub>3</sub>, 101 MHz) of 2,6-FP/MTBD (f)

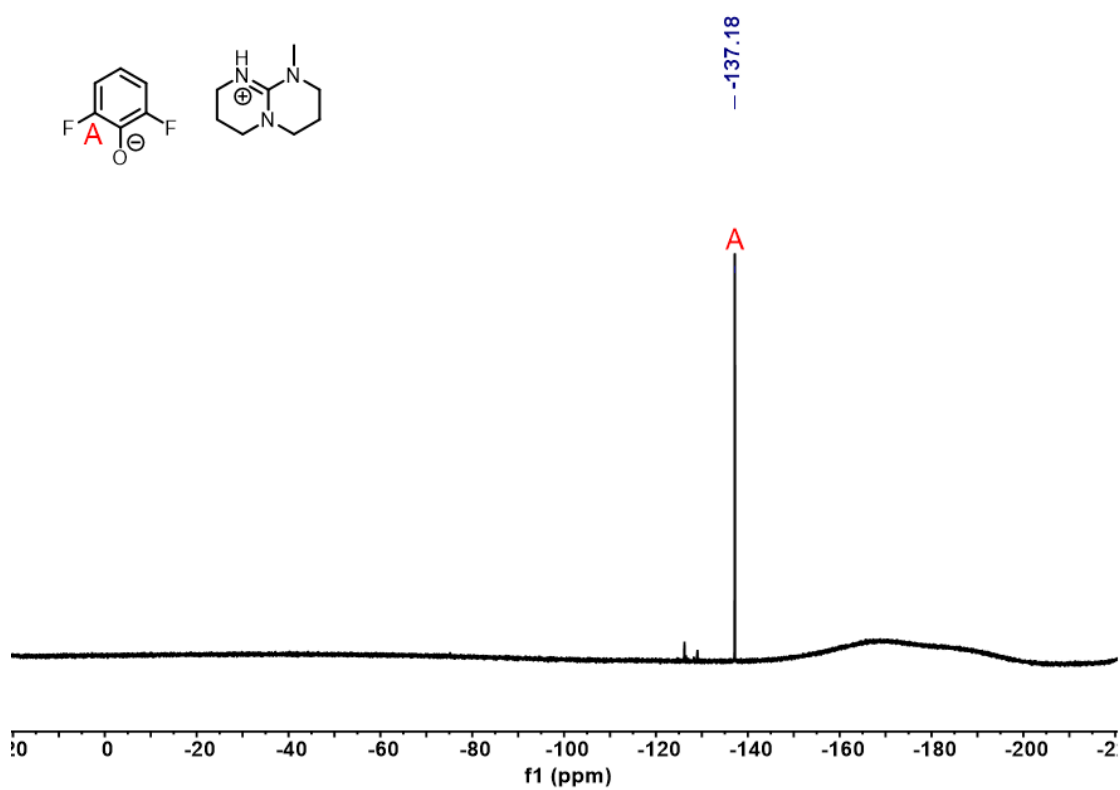

Figure S60.  $^{19}\text{F}$  NMR spectrum (CDCl<sub>3</sub>, 376 MHz) of 2,6-FP/MTBD (f)

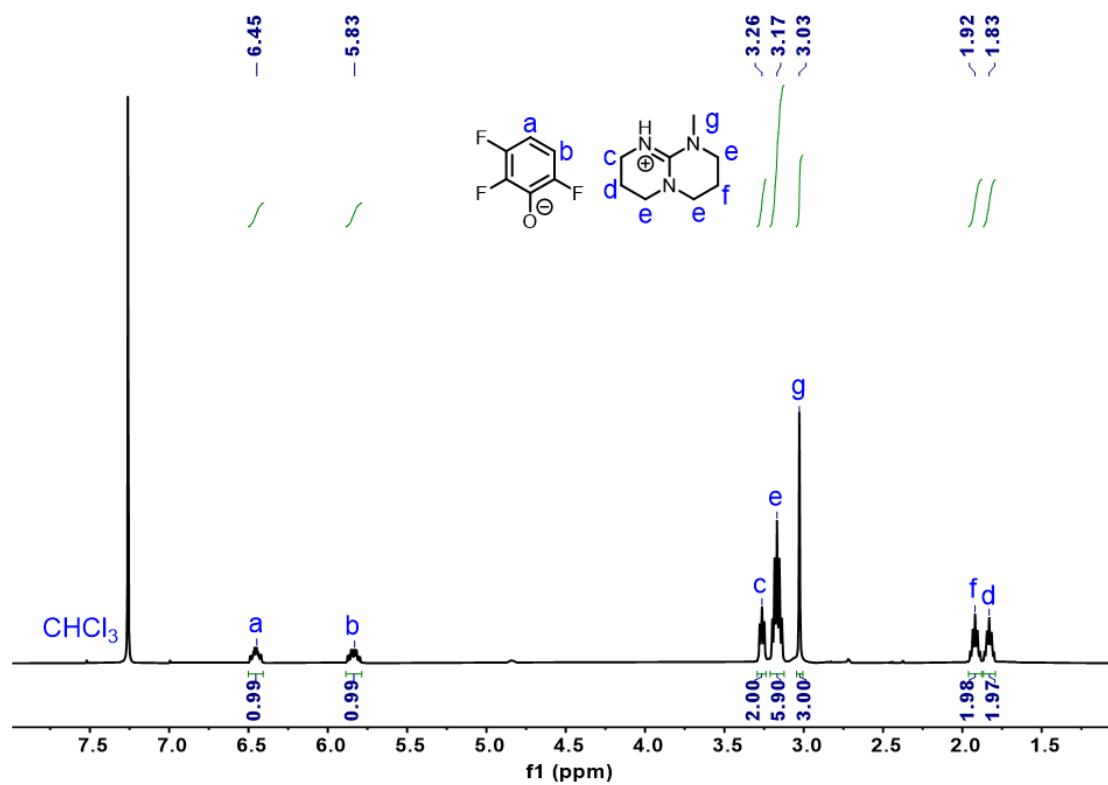

Figure S61.  $^1\text{H}$  NMR spectrum ( $\text{CDCl}_3$ , 400 MHz) of 2,3,6-FP/MTBD (g')

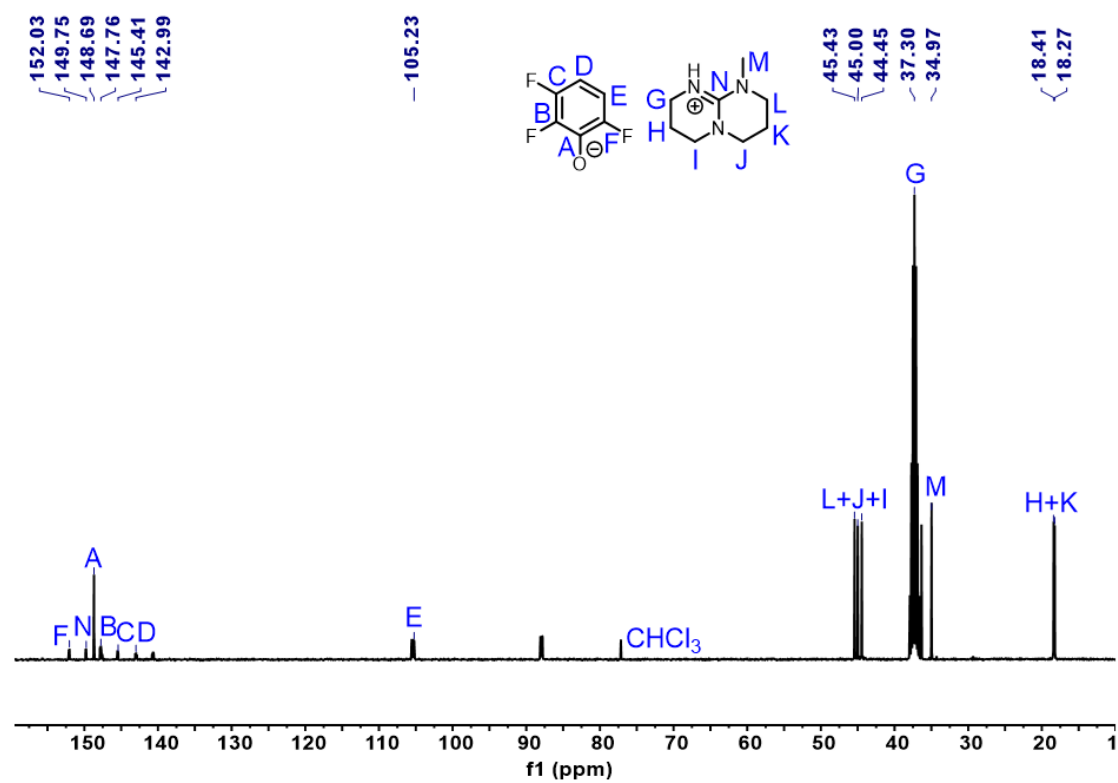

Figure S62.  $^{13}\text{C}$  NMR spectrum ( $\text{CDCl}_3$ , 101 MHz) of 2,3,6-FP/MTBD (g')

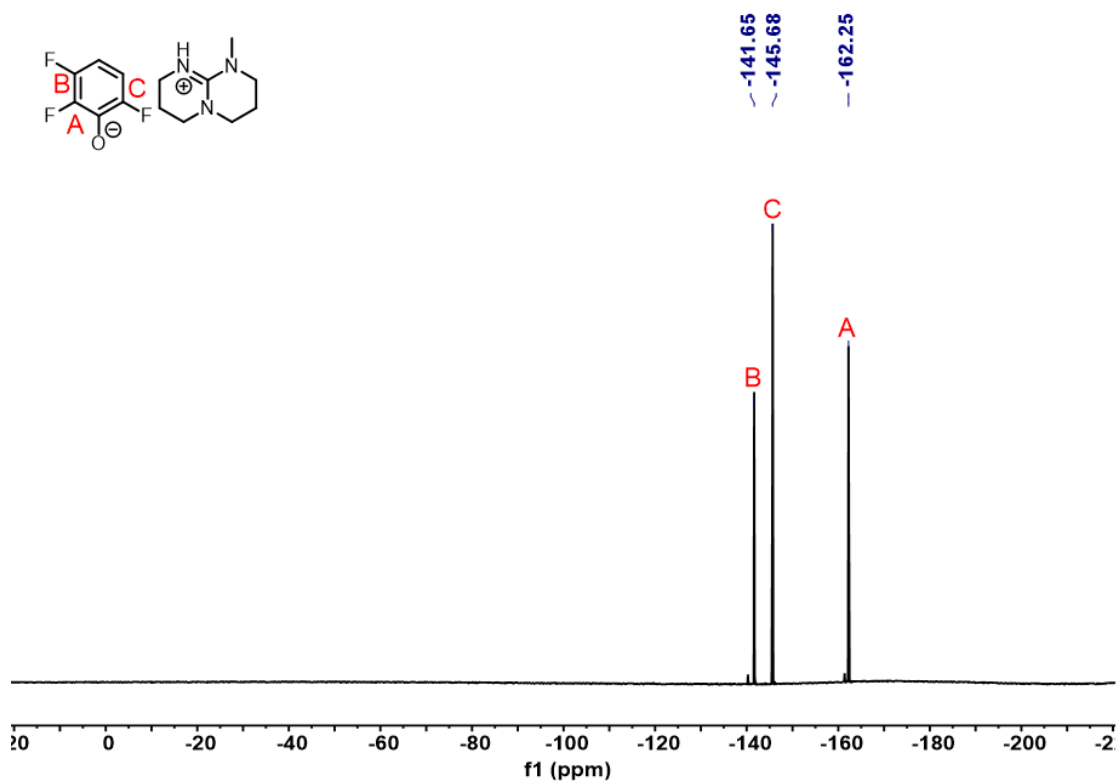

Figure S63.  $^{19}\text{F}$  NMR spectrum ( $\text{CDCl}_3$ , 376 MHz) of 2,3,6-FP/MTBD (g')

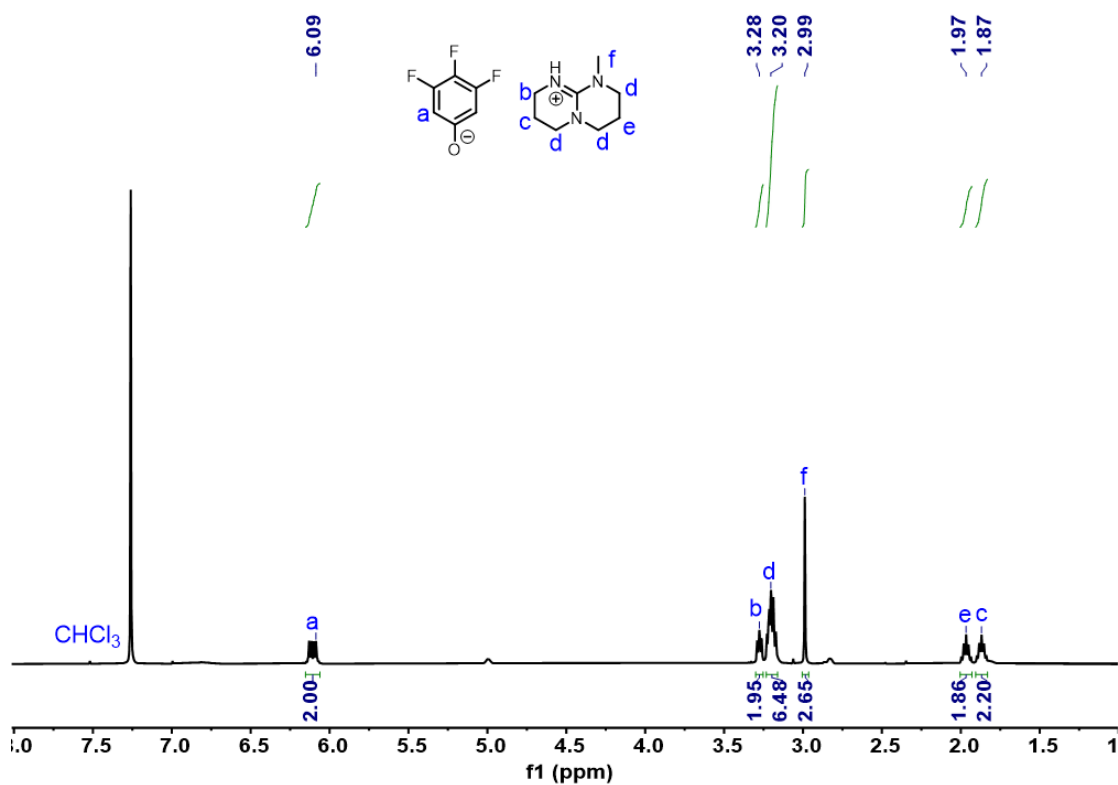

Figure S64.  $^1\text{H}$  NMR spectrum ( $\text{CDCl}_3$ , 400 MHz) of 3,4,5-FP/MTBD (h')

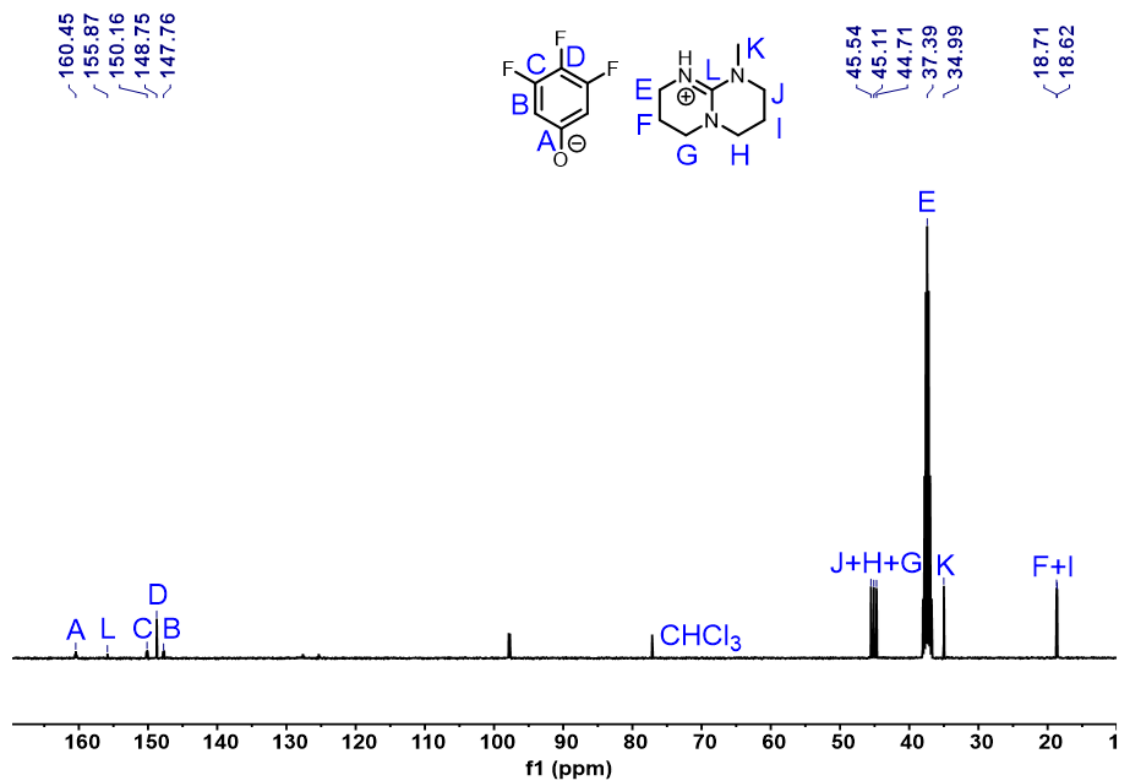

Figure S65. <sup>13</sup>C NMR spectrum (CDCl<sub>3</sub>, 101 MHz) of 3,4,5-FP/MTBD (h')

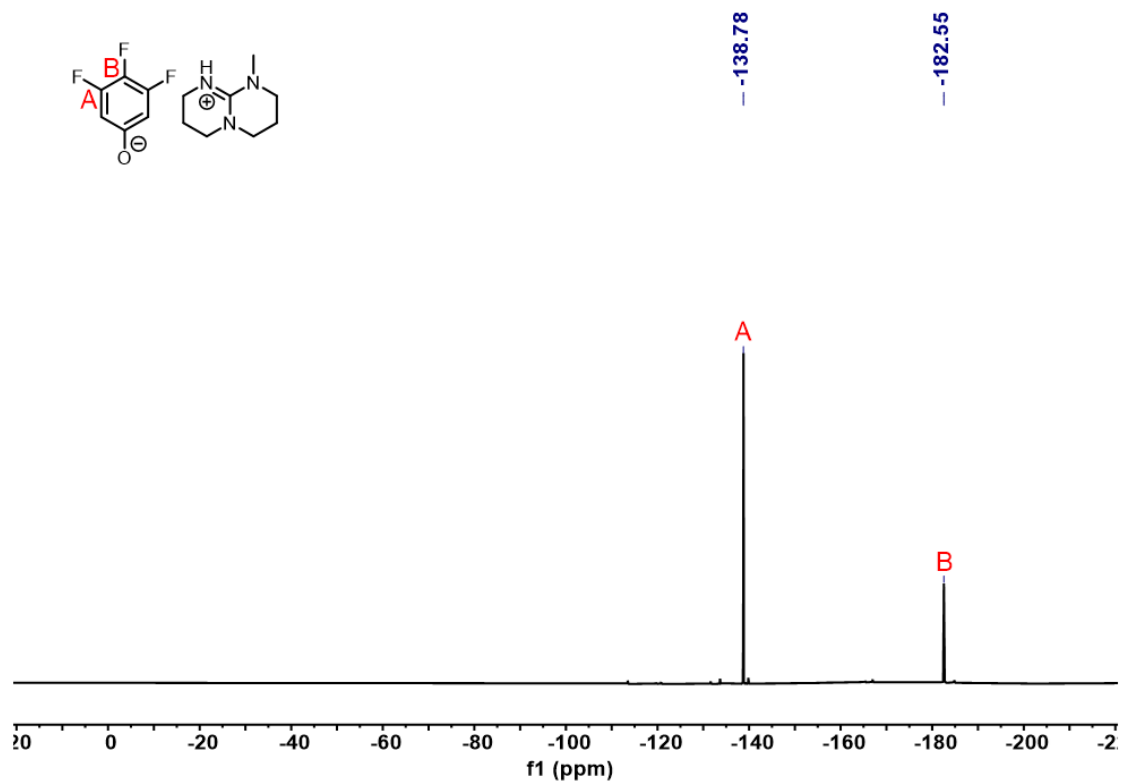

Figure S66. <sup>19</sup>F NMR spectrum (CDCl<sub>3</sub>, 376 MHz) of 3,4,5-FP/MTBD (h')

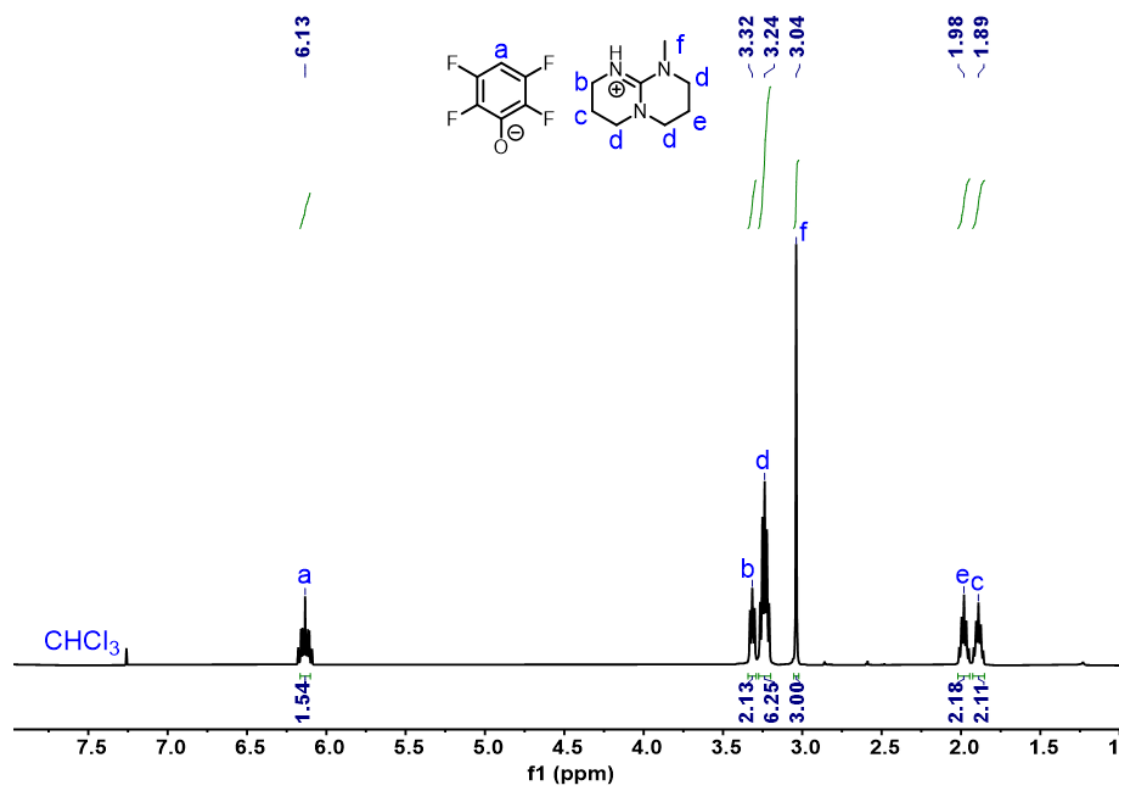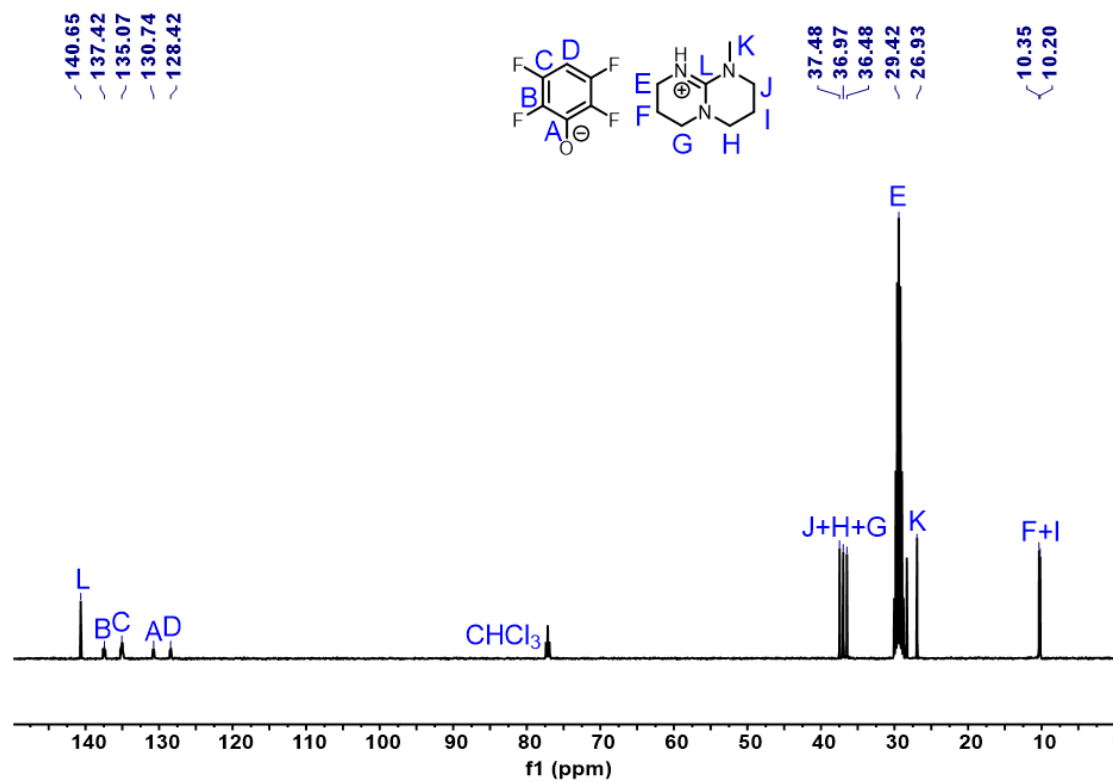

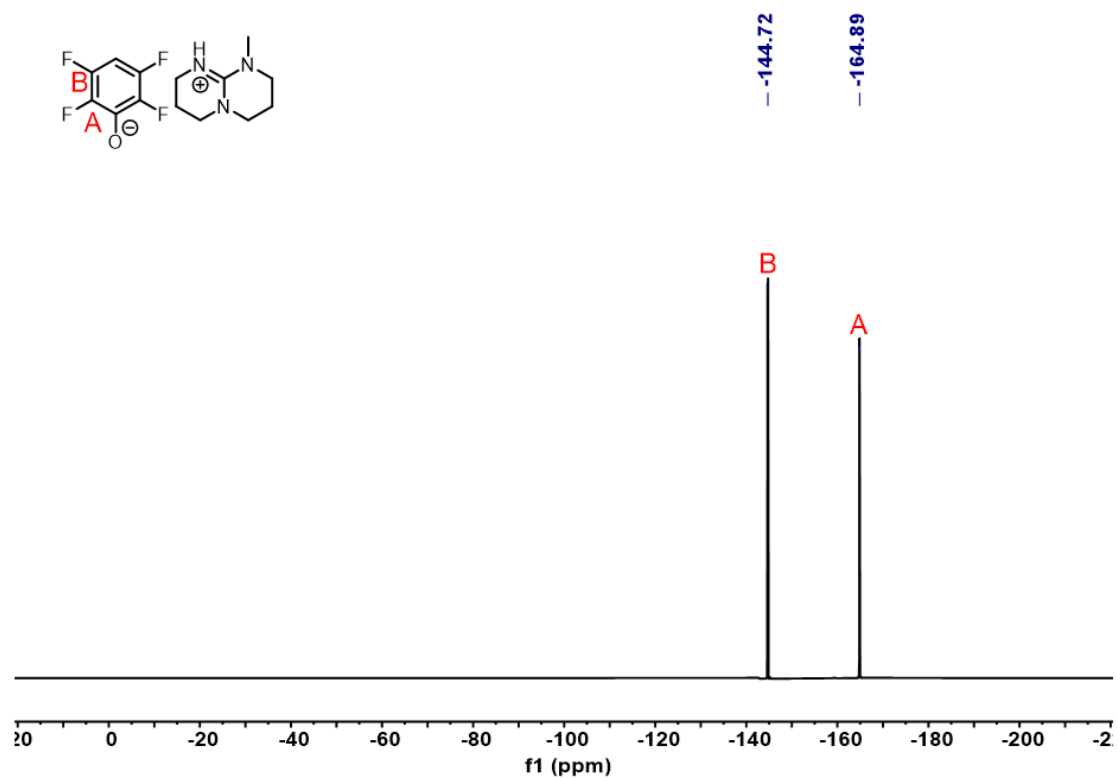

**Figure S69.**  $^{19}\text{F}$  NMR spectrum ( $\text{CDCl}_3$ , 376 MHz) of 2,3,5,6-FP/MTBD (I')

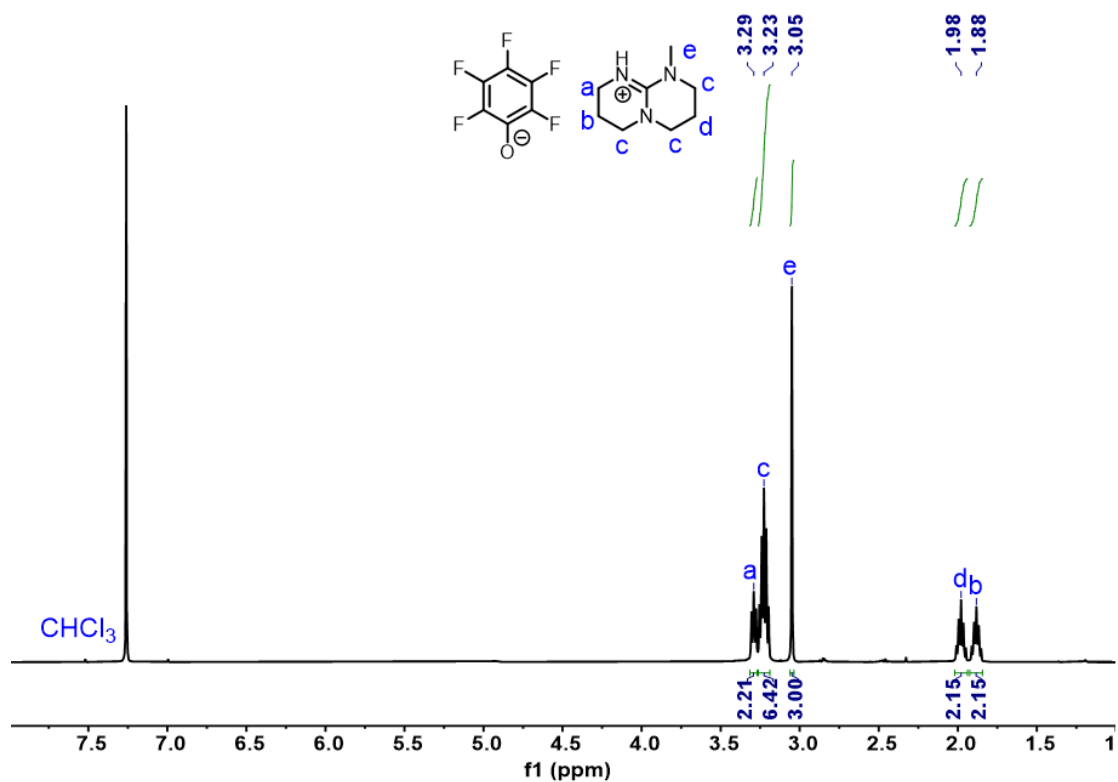

**Figure S70.**  $^1\text{H}$  NMR spectrum ( $\text{CDCl}_3$ , 400 MHz) of 2,3,4,5,6-FP/MTBD (j')



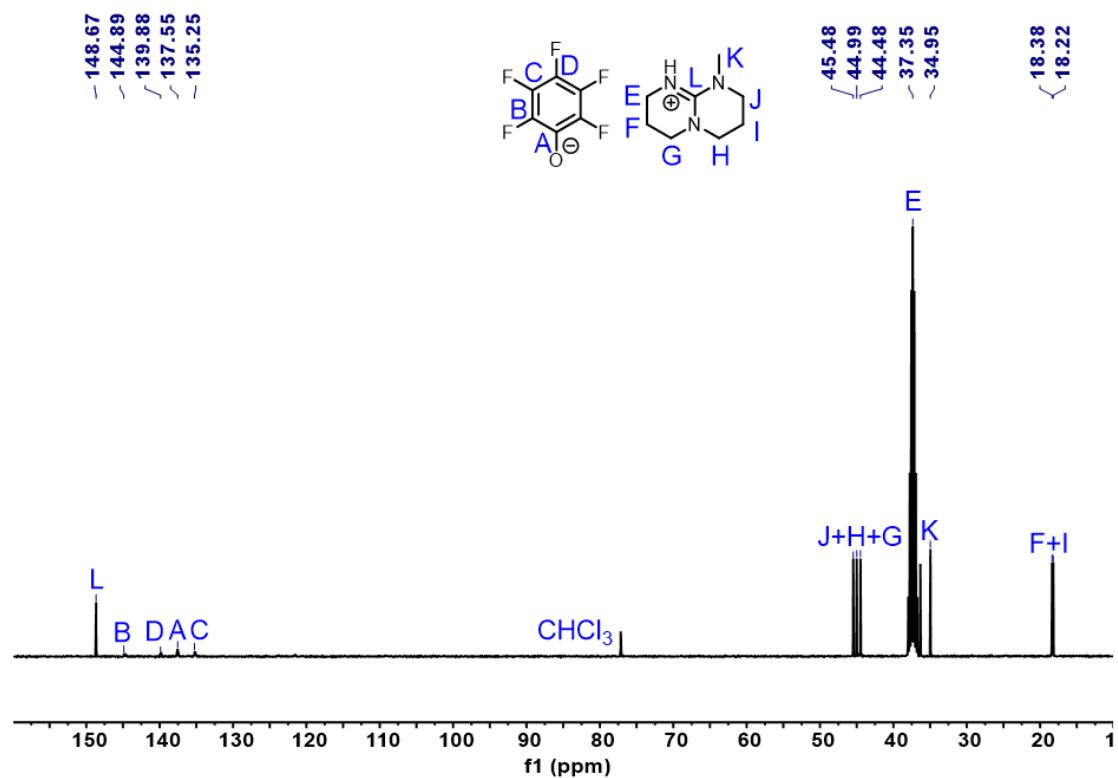

Figure S71.  $^{13}\text{C}$  NMR spectrum (CDCl<sub>3</sub>, 101 MHz) of 2,3,4,5,6-FP/MTBD (j')

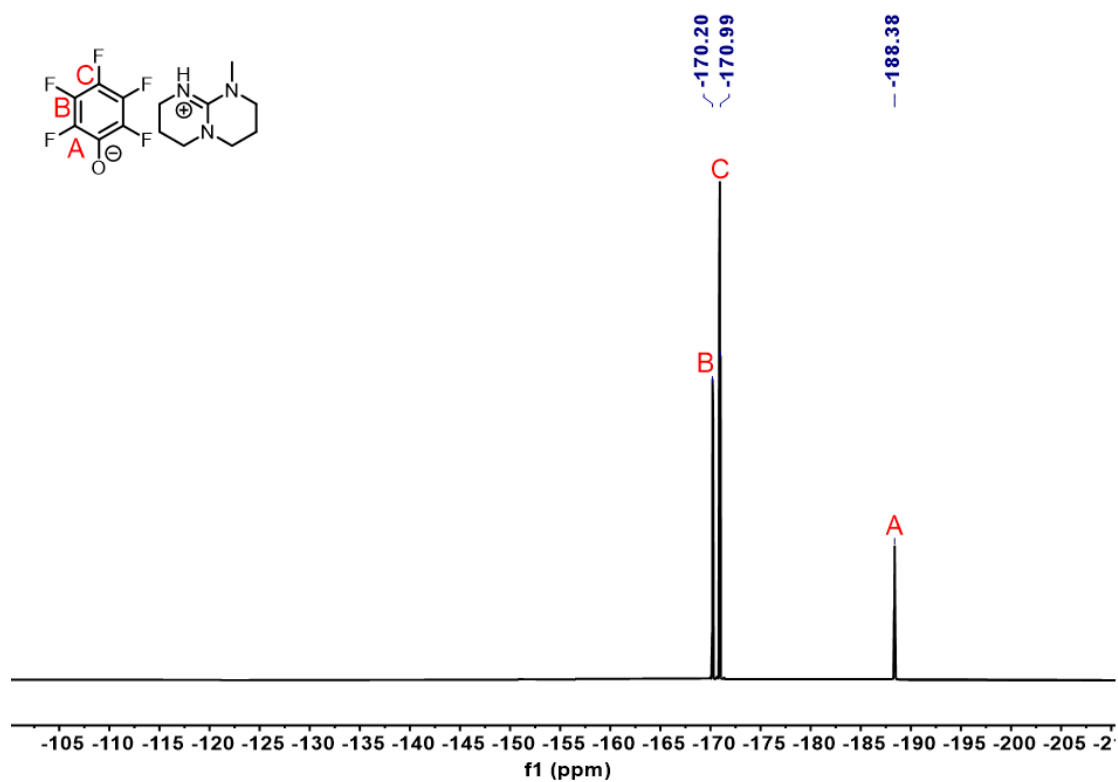

Figure S72.  $^{19}\text{F}$  NMR spectrum (CDCl<sub>3</sub>, 376 MHz) of 2,3,4,5,6-FP/MTBD (j')

## Computational Study

Geometry optimizations of all structures were simulated at B3LYP, with 6-31+G(d,p) basis set for all elements. Single-point energy were obtained on optimized structures with B3LYP /aug-cc-pVTZ. Reported energies are free energies. All DFT calculations were performed using Gaussian 16 program<sup>1</sup>.

### Cartesian coordinates of the calculated species

*o*-FP/DMAP(a)

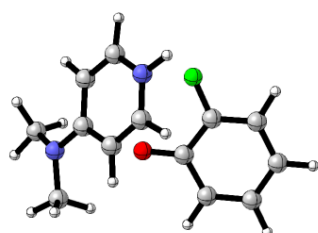

|   |             |             |             |
|---|-------------|-------------|-------------|
| C | 3.46099600  | 1.52420000  | -0.50660400 |
| C | 2.13421300  | 1.79968700  | -0.17867900 |
| C | 1.27138800  | 0.85183900  | 0.46865800  |
| C | 1.91807800  | -0.40453900 | 0.71354500  |
| C | 3.23582700  | -0.69549600 | 0.39875700  |
| C | 4.03340500  | 0.27522300  | -0.22498600 |
| H | 4.06208000  | 2.29627300  | -0.98574100 |
| H | 1.70825400  | 2.78010700  | -0.38860700 |
| H | 3.63154600  | -1.67749200 | 0.65273500  |
| O | 0.04743200  | 1.09616700  | 0.77521300  |
| C | -2.11933100 | -1.27303200 | 0.53092900  |
| C | -1.41375200 | -2.40681900 | 0.25259300  |
| C | -0.48301700 | -1.42067100 | -1.68925300 |
| C | -1.17369100 | -0.26315300 | -1.46995500 |
| C | -1.99797200 | -0.11643900 | -0.30926100 |
| H | -2.70969400 | -1.25170200 | 1.43602300  |
| H | -1.43486100 | -3.27883100 | 0.89607300  |
| H | 0.20739900  | -1.54135900 | -2.51577200 |
| H | -1.00064800 | 0.56508500  | -2.14220400 |
| C | -3.22213400 | 1.23026600  | 1.29452000  |
| H | -3.74800400 | 2.18631100  | 1.31066000  |
| H | -3.94620800 | 0.45159200  | 1.55523900  |
| H | -2.40754800 | 1.25209400  | 2.03017800  |
| C | -2.37654600 | 2.22730500  | -0.82111900 |
| H | -2.51224700 | 2.04634100  | -1.89224600 |
| H | -3.07700000 | 3.01162600  | -0.52792500 |

|   |             |             |             |
|---|-------------|-------------|-------------|
| H | -1.34656000 | 2.54404000  | -0.61092400 |
| H | 5.06938000  | 0.06045600  | -0.47309400 |
| F | 1.17813900  | -1.40180200 | 1.32621200  |
| N | -2.68149900 | 1.01674100  | -0.05169300 |
| N | -0.61353800 | -2.48482700 | -0.84403800 |
| H | -0.01811500 | -3.29127600 | -0.96676100 |

*m*-FP/DMAP(b)

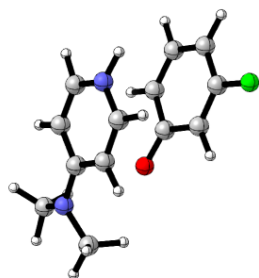

|   |             |             |             |
|---|-------------|-------------|-------------|
| C | -2.56303800 | 1.68553900  | 0.51149600  |
| C | -1.29406500 | 1.53074100  | 1.05837100  |
| C | -0.71056100 | 0.22706000  | 1.27969700  |
| C | -1.56706100 | -0.89195900 | 0.96364300  |
| C | -2.81719100 | -0.68178500 | 0.41380800  |
| C | -3.35188000 | 0.57881500  | 0.14160600  |
| H | -2.96522100 | 2.68805500  | 0.36689700  |
| H | -0.70359200 | 2.39892100  | 1.34443800  |
| O | 0.49494400  | 0.06833000  | 1.67356300  |
| C | 1.46225400  | 1.21350400  | -1.00685800 |
| C | 0.28960100  | 1.34692200  | -1.69626700 |
| C | 0.00445500  | -0.99830000 | -1.77411300 |
| C | 1.16873300  | -1.19414500 | -1.08520900 |
| C | 1.92457500  | -0.07867900 | -0.60372400 |
| H | 1.96750800  | 2.11513400  | -0.69033800 |
| H | -0.13000200 | 2.31285000  | -1.94965400 |
| H | -0.63258100 | -1.81766500 | -2.08559600 |
| H | 1.44107900  | -2.20937400 | -0.83275400 |
| C | 3.58636200  | 0.92327000  | 0.85281100  |
| H | 4.48897800  | 0.61636900  | 1.38436200  |
| H | 3.87240300  | 1.71006900  | 0.14726600  |
| H | 2.84890100  | 1.30772700  | 1.57067000  |
| C | 3.28971700  | -1.54106800 | 0.77015800  |
| H | 3.37679900  | -2.32687700 | 0.01299600  |
| H | 4.23996700  | -1.49564200 | 1.30535200  |
| H | 2.48273800  | -1.78342200 | 1.47529700  |
| H | -4.35300200 | 0.68172800  | -0.26496300 |
| H | -1.21660500 | -1.90152100 | 1.16018700  |

|   |             |             |             |
|---|-------------|-------------|-------------|
| F | -3.57903300 | -1.78387500 | 0.09654200  |
| N | 3.04201300  | -0.23906000 | 0.14435200  |
| N | -0.41811600 | 0.25494900  | -2.10342500 |
| H | -1.36431100 | 0.38116400  | -2.44054700 |

*p*-FP/DMAP(c)

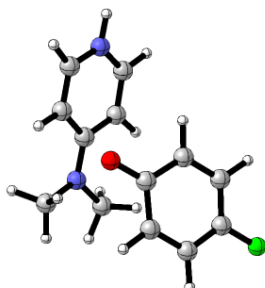

|   |             |             |             |
|---|-------------|-------------|-------------|
| C | -3.14220400 | 0.60219000  | 0.35761000  |
| C | -2.01956400 | 1.00779700  | 1.08156400  |
| C | -0.90957900 | 0.13111600  | 1.34614800  |
| C | -1.05949300 | -1.20507300 | 0.83376700  |
| C | -2.18381200 | -1.61150500 | 0.10963300  |
| C | -3.20538900 | -0.69929800 | -0.13288700 |
| H | -3.97300700 | 1.28227300  | 0.17939800  |
| H | -1.97627500 | 2.01625300  | 1.48999400  |
| H | -0.26882100 | -1.92109400 | 1.05194100  |
| H | -2.27973900 | -2.63191800 | -0.25716500 |
| O | 0.15097000  | 0.52267100  | 1.96715400  |
| C | 1.68606600  | -0.76479500 | -1.30574900 |
| C | 2.47777900  | -1.81584200 | -0.92731700 |
| C | 3.30758000  | -0.59108100 | 0.92753300  |
| C | 2.53019900  | 0.48594900  | 0.60828300  |
| C | 1.69359000  | 0.45751400  | -0.55502000 |
| H | 1.03733800  | -0.89563700 | -2.16090300 |
| H | 2.48891900  | -2.75906000 | -1.46232700 |
| H | 3.93701400  | -0.61698900 | 1.80902600  |
| H | 2.53216400  | 1.33716000  | 1.27180900  |
| C | 0.02540700  | 1.41787600  | -2.05029100 |
| H | -0.41878100 | 2.39907800  | -2.21802000 |
| H | 0.55504200  | 1.12472900  | -2.96476200 |
| H | -0.78092200 | 0.70456900  | -1.84002100 |
| C | 0.90046100  | 2.70178100  | -0.05614000 |
| H | 1.88301100  | 3.19062000  | -0.01905600 |
| H | 0.18162900  | 3.40526000  | -0.47605300 |
| H | 0.58184200  | 2.39476100  | 0.95133400  |
| F | -4.31172800 | -1.09874100 | -0.85167500 |
| N | 0.95307400  | 1.51242200  | -0.91845700 |

|   |            |             |            |
|---|------------|-------------|------------|
| N | 3.28302500 | -1.72659700 | 0.16293900 |
| H | 3.83943900 | -2.52325500 | 0.43846200 |

2,3-FP/DMAP(d)

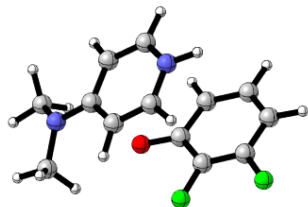

|   |             |             |             |
|---|-------------|-------------|-------------|
| C | 2.53332100  | 1.41629900  | -1.28043300 |
| C | 1.26252700  | 1.01986600  | -1.69056000 |
| C | 0.65485100  | -0.21060100 | -1.25520600 |
| C | 1.50108600  | -1.00353600 | -0.40030800 |
| C | 2.75834500  | -0.58567200 | 0.00327900  |
| C | 3.30478200  | 0.63247300  | -0.40630600 |
| H | 2.94759600  | 2.35258100  | -1.65179300 |
| H | 0.68369400  | 1.63450300  | -2.37701700 |
| O | -0.53763300 | -0.56164500 | -1.54152500 |
| C | -1.69194300 | 1.65151200  | 0.26293100  |
| C | -0.59269600 | 2.25422900  | 0.80627600  |
| C | -0.05359500 | 0.29975900  | 2.02294100  |
| C | -1.13905200 | -0.35544600 | 1.51422700  |
| C | -1.98808200 | 0.28003300  | 0.55230300  |
| H | -2.27122900 | 2.21110600  | -0.45806400 |
| H | -0.30063800 | 3.26711600  | 0.55521500  |
| H | 0.65116900  | -0.17840800 | 2.69341700  |
| H | -1.26956300 | -1.39466900 | 1.78009000  |
| C | -3.68052800 | 0.23076900  | -1.18435700 |
| H | -4.52021600 | -0.40193700 | -1.47723400 |
| H | -4.08189100 | 1.22153900  | -0.94806500 |
| H | -2.96376000 | 0.29898500  | -2.01397400 |
| C | -3.09439300 | -1.82611900 | 0.08336900  |
| H | -3.14476300 | -2.14681600 | 1.12876300  |
| H | -4.00525500 | -2.16908900 | -0.41037900 |
| H | -2.21746500 | -2.26877700 | -0.40814500 |
| H | 4.30463700  | 0.91211400  | -0.08990800 |
| F | 3.47365200  | -1.38820600 | 0.84565100  |
| N | -3.03451200 | -0.36277000 | -0.01008300 |
| N | 0.20412500  | 1.59785300  | 1.69611000  |
| H | 1.08943500  | 2.00695100  | 1.96371200  |
| F | 1.03349000  | -2.20279700 | 0.05151100  |

2,4-FP/DMAP(e)

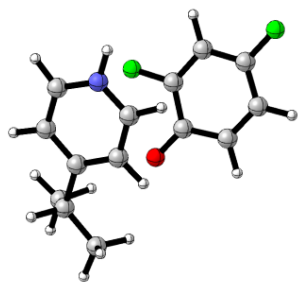

|   |             |             |             |
|---|-------------|-------------|-------------|
| C | -3.13344300 | 1.44756300  | 0.58310600  |
| C | -1.83429000 | 1.85363600  | 0.27942700  |
| C | -0.92540300 | 1.08257300  | -0.52906600 |
| C | -1.48790900 | -0.17468500 | -0.94387900 |
| C | -2.78238500 | -0.60324800 | -0.66687300 |
| C | -3.59304700 | 0.22232500  | 0.10480400  |
| H | -3.79391300 | 2.07235200  | 1.17943200  |
| H | -1.47149100 | 2.81786900  | 0.62985100  |
| O | 0.26593000  | 1.44736100  | -0.80631300 |
| C | 2.47597300  | -1.66807800 | -0.09310700 |
| C | 1.48796400  | -2.60557500 | 0.10437700  |
| C | 0.22674400  | -1.05503700 | 1.39057400  |
| C | 1.20698000  | -0.08952500 | 1.21026600  |
| C | 2.34148200  | -0.36061800 | 0.43468200  |
| H | 3.34058800  | -1.93726300 | -0.69110300 |
| H | 1.51959300  | -3.60817300 | -0.30727600 |
| H | -0.68004700 | -0.89310300 | 1.95941000  |
| H | 1.04561100  | 0.89041000  | 1.63707800  |
| C | 3.40639200  | 0.67430300  | 0.12947700  |
| H | 4.37123400  | 0.19658000  | 0.36803400  |
| C | 3.39980200  | 0.99823400  | -1.38595100 |
| H | 4.19016600  | 1.72610300  | -1.60474400 |
| H | 3.58864300  | 0.10616800  | -1.99466800 |
| H | 2.42643700  | 1.41155500  | -1.66840200 |
| C | 3.28285500  | 1.96025600  | 0.95610100  |
| H | 3.29334100  | 1.76097900  | 2.03531700  |
| H | 4.12873800  | 2.62039800  | 0.73422300  |
| H | 2.36117800  | 2.49437700  | 0.69849600  |
| F | -0.70375300 | -1.01519100 | -1.69572800 |
| H | -3.14966200 | -1.54922800 | -1.05594300 |
| F | -4.86882700 | -0.18628900 | 0.39562500  |
| N | 0.39688100  | -2.28656200 | 0.83804900  |
| H | -0.35308900 | -2.96141500 | 0.92175700  |

2,6-FP/DMAP(f)

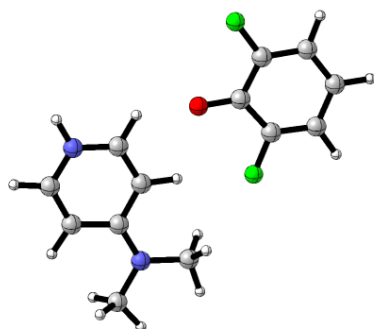

|   |             |             |             |
|---|-------------|-------------|-------------|
| C | 3.46767000  | -1.85990500 | 0.00006000  |
| C | 2.32803300  | -1.07311700 | 0.00002900  |
| C | 2.29441300  | 0.35447500  | -0.00002400 |
| C | 3.61400300  | 0.90601800  | -0.00003800 |
| C | 4.78457300  | 0.16376500  | -0.00000900 |
| C | 4.72353300  | -1.23772600 | 0.00004400  |
| H | 3.36692800  | -2.94281400 | 0.00009700  |
| H | 5.73676700  | 0.68922400  | -0.00002500 |
| O | 1.21217300  | 1.04281500  | -0.00006300 |
| C | -4.01658800 | 0.85229900  | 0.00004800  |
| C | -3.72300300 | 2.19041900  | 0.00005600  |
| C | -1.39078900 | 1.73807000  | 0.00003600  |
| C | -1.62674200 | 0.38556100  | 0.00003800  |
| C | -2.95783100 | -0.11721300 | 0.00001100  |
| H | -5.05845300 | 0.55788200  | 0.00009500  |
| H | -4.49077800 | 2.95656500  | 0.00008200  |
| H | -0.36042100 | 2.09820000  | 0.00002700  |
| H | -0.73357200 | -0.23180300 | 0.00005200  |
| C | -2.09342200 | -2.40219400 | 0.00000600  |
| H | -2.50074000 | -3.41378000 | 0.00005700  |
| H | -1.46142300 | -2.27534000 | -0.88554800 |
| H | -1.46142900 | -2.27525300 | 0.88555100  |
| C | -4.58337300 | -1.94289600 | -0.00011100 |
| H | -5.13133700 | -1.61215700 | -0.89279200 |
| H | -4.56461700 | -3.03308700 | -0.00046800 |
| H | -5.13124800 | -1.61272500 | 0.89284200  |
| H | 5.63357700  | -1.83043800 | 0.00006600  |
| F | 3.71186600  | 2.27136800  | -0.00008600 |
| F | 1.09489300  | -1.71342000 | 0.00004800  |
| N | -2.43175200 | 2.61728900  | 0.00002700  |
| H | -2.23253500 | 3.60919500  | 0.00007000  |
| N | -3.20993400 | -1.44486900 | -0.00004500 |

2,3,6-FP/DMAP(g)

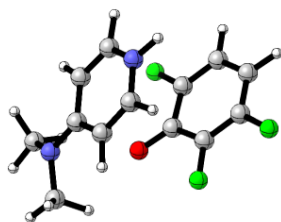

|   |             |             |             |
|---|-------------|-------------|-------------|
| C | 2.45991600  | 1.74420900  | -0.12628800 |
| C | 1.20716300  | 1.58831200  | -0.69177500 |
| C | 0.63180100  | 0.33163000  | -1.09044100 |
| C | 1.52343700  | -0.76929000 | -0.84710100 |
| C | 2.77813400  | -0.62231400 | -0.27203100 |
| C | 3.27500900  | 0.62244900  | 0.10843500  |
| H | 2.80549100  | 2.74429700  | 0.12397400  |
| O | -0.54518700 | 0.19302400  | -1.55083900 |
| C | -1.63772600 | 1.02347400  | 1.22859200  |
| C | -0.55341500 | 1.08732200  | 2.05676300  |
| C | -0.21825600 | -1.24797400 | 1.89237000  |
| C | -1.29245200 | -1.37613200 | 1.05839000  |
| C | -2.03703300 | -0.22313300 | 0.64557200  |
| H | -2.11874700 | 1.95169300  | 0.95456900  |
| H | -0.18457500 | 2.02359700  | 2.45915600  |
| H | 0.40623900  | -2.09001000 | 2.16832700  |
| H | -1.49955900 | -2.35514200 | 0.65006800  |
| C | -3.59820900 | 0.91672100  | -0.81825900 |
| H | -4.44505900 | 0.65607100  | -1.45521400 |
| H | -3.96248900 | 1.60573000  | -0.04952600 |
| H | -2.81510800 | 1.39646400  | -1.42068500 |
| C | -3.24569200 | -1.54091600 | -0.99239700 |
| H | -3.38221600 | -2.40474300 | -0.33409300 |
| H | -4.14687000 | -1.44410800 | -1.60010700 |
| H | -2.37522000 | -1.69325100 | -1.64466900 |
| H | 4.27143200  | 0.70804100  | 0.52845800  |
| F | 3.53492500  | -1.73886100 | -0.06397900 |
| N | -3.07515100 | -0.31180000 | -0.20984500 |
| N | 0.13412000  | -0.03631900 | 2.40709100  |
| H | 1.00552100  | 0.05302900  | 2.91195800  |
| F | 1.09840800  | -2.01886600 | -1.18159600 |
| F | 0.43709200  | 2.70604100  | -0.88522500 |

3,4,5-FP/DMAP(h)



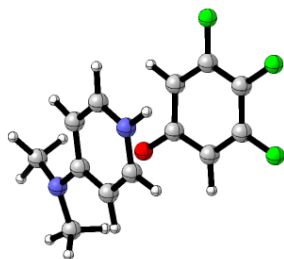

|   |             |             |             |
|---|-------------|-------------|-------------|
| C | 2.31680400  | 1.19174100  | -0.48401500 |
| C | 1.02536000  | 1.21967500  | -0.97833400 |
| C | 0.30014100  | -0.00077200 | -1.23211300 |
| C | 1.02547400  | -1.22092000 | -0.97732400 |
| C | 2.31692500  | -1.19244200 | -0.48303100 |
| C | 2.98973000  | -0.00020500 | -0.20526800 |
| H | 0.55532800  | 2.17481500  | -1.19331700 |
| O | -0.92180300 | -0.00097100 | -1.61047700 |
| C | -1.82729700 | 1.21525100  | 1.04494600  |
| C | -0.71987100 | 1.18486000  | 1.84402700  |
| C | -0.71987400 | -1.18201800 | 1.84584400  |
| C | -1.82730100 | -1.21362200 | 1.04681100  |
| C | -2.41366800 | 0.00045200  | 0.56287600  |
| H | -2.19140400 | 2.18069100  | 0.72269500  |
| H | -0.21651700 | 2.08494100  | 2.17722000  |
| H | -0.21651400 | -2.08159200 | 2.18039600  |
| H | -2.19143900 | -2.17954700 | 0.72605400  |
| C | -3.87487200 | 1.24186200  | -0.92467100 |
| H | -4.78497400 | 1.06241200  | -1.49968400 |
| H | -4.09445200 | 2.03237100  | -0.19990800 |
| H | -3.06951500 | 1.55955000  | -1.60057100 |
| C | -3.87506400 | -1.24360700 | -0.92215300 |
| H | -4.09571200 | -2.03233400 | -0.19575300 |
| H | -4.78454700 | -1.06490900 | -1.49836700 |
| H | -3.06939800 | -1.56334400 | -1.59670700 |
| H | 0.55553500  | -2.17630200 | -1.19144300 |
| F | 2.97148300  | -2.36085900 | -0.23457000 |
| N | -3.49921400 | -0.00021400 | -0.24263800 |
| N | -0.18561000 | 0.00173700  | 2.26151400  |
| H | 0.69006600  | 0.00212600  | 2.76628200  |
| F | 4.25534400  | 0.00006400  | 0.28545600  |
| F | 2.97126300  | 2.36042800  | -0.23652900 |

2,3,5,6-FP/DMAP(i)

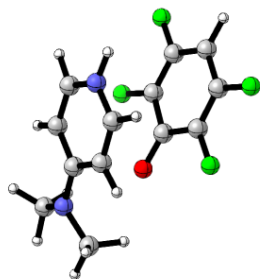

|   |             |             |             |
|---|-------------|-------------|-------------|
| C | 2.48901200  | 1.18553800  | -0.23965300 |
| C | 1.22545500  | 1.19850900  | -0.80618000 |
| C | 0.49535600  | -0.00045500 | -1.12195900 |
| C | 1.22465300  | -1.19963700 | -0.80518500 |
| C | 2.48821600  | -1.18703600 | -0.23866400 |
| C | 3.15726900  | -0.00084400 | 0.06946000  |
| O | -0.69006300 | -0.00024200 | -1.57583300 |
| C | -1.65082200 | 1.21668300  | 1.15270300  |
| C | -0.57682200 | 1.18505700  | 1.99611800  |
| C | -0.57665100 | -1.18064000 | 1.99862400  |
| C | -1.65062400 | -1.21418000 | 1.15524500  |
| C | -2.22298700 | 0.00068900  | 0.65402700  |
| H | -1.99206400 | 2.18204100  | 0.80664500  |
| H | -0.08206000 | 2.08597000  | 2.34074100  |
| H | -0.08182900 | -2.08076400 | 2.34522400  |
| H | -1.99184400 | -2.18031300 | 0.81133100  |
| C | -3.60433300 | 1.24376000  | -0.90519100 |
| H | -4.48287600 | 1.06100600  | -1.52597900 |
| H | -3.86300000 | 2.02999600  | -0.18899300 |
| H | -2.76539300 | 1.56429800  | -1.53730100 |
| C | -3.60323400 | -1.24611800 | -0.90299900 |
| H | -3.86323300 | -2.03075100 | -0.18549500 |
| H | -4.48060300 | -1.06468100 | -1.52581200 |
| H | -2.76319200 | -1.56804100 | -1.53292500 |
| H | 4.15875800  | -0.00100200 | 0.48299700  |
| F | 3.09438700  | -2.37314300 | 0.04304100  |
| N | -3.25658600 | -0.00040000 | -0.20930400 |
| N | -0.05870600 | 0.00269500  | 2.43283800  |
| H | 0.79977000  | 0.00332800  | 2.96681500  |
| F | 0.62444200  | -2.39555200 | -1.05507900 |
| F | 0.62609500  | 2.39463900  | -1.05716800 |
| F | 3.09598600  | 2.37148000  | 0.04105100  |

2,3,4,5,6-FP/DMAP(j)

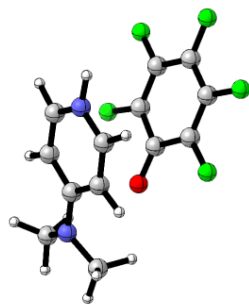

|   |             |             |             |
|---|-------------|-------------|-------------|
| C | 2.31012800  | 1.19325400  | -0.33198000 |
| C | 1.01522300  | 1.19433100  | -0.83416500 |
| C | 0.26880100  | 0.00144100  | -1.11839300 |
| C | 1.00565000  | -1.19645300 | -0.83019100 |
| C | 2.30047400  | -1.20420600 | -0.32799500 |
| C | 2.96981000  | -0.00768800 | -0.06526700 |
| O | -0.93462900 | 0.00559100  | -1.53210100 |
| C | -1.91396200 | 1.22343600  | 1.14719700  |
| C | -0.87996100 | 1.19818400  | 2.03858500  |
| C | -0.87923900 | -1.16891900 | 2.05640400  |
| C | -1.91311800 | -1.20818500 | 1.16529100  |
| C | -2.47334600 | 0.00361100  | 0.64072500  |
| H | -2.23955600 | 2.18586500  | 0.77862300  |
| H | -0.40255600 | 2.10155500  | 2.40104900  |
| H | -0.40156500 | -2.06653100 | 2.43262000  |
| H | -2.23831400 | -2.17630300 | 0.81152200  |
| C | -3.83395700 | 1.23633200  | -0.94431100 |
| H | -4.70454800 | 1.04929600  | -1.57490400 |
| H | -4.10192800 | 2.02653600  | -0.23593200 |
| H | -2.98682900 | 1.55264900  | -1.56725600 |
| C | -3.83286300 | -1.25343700 | -0.92603200 |
| H | -4.09900300 | -2.03389200 | -0.20626500 |
| H | -4.70434200 | -1.07674100 | -1.55837900 |
| H | -2.98638800 | -1.57807800 | -1.54566900 |
| F | 2.92175400  | -2.37779200 | -0.07106700 |
| N | -3.49433000 | -0.00335100 | -0.23646300 |
| N | -0.38181300 | 0.01809700  | 2.50640700  |
| H | 0.43095900  | 0.02285300  | 3.10708800  |
| F | 0.39825900  | -2.39223900 | -1.05158000 |
| F | 0.41769500  | 2.39426600  | -1.05979400 |
| F | 2.94087900  | 2.36267000  | -0.07900800 |
| F | 4.23055200  | -0.01194400 | 0.42872800  |

Ph/DMAP(k)

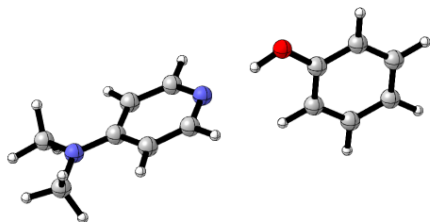

|   |             |             |             |
|---|-------------|-------------|-------------|
| C | 5.60275200  | 0.08392200  | 0.00450400  |
| C | 4.56199700  | 1.00847400  | 0.09214100  |
| C | 3.22570900  | 0.57494600  | 0.05412900  |
| C | 2.95357200  | -0.79883600 | -0.07313000 |
| C | 4.00625400  | -1.71517400 | -0.16000300 |
| C | 5.33597100  | -1.28532200 | -0.12224700 |
| H | 6.63196200  | 0.43614700  | 0.03548600  |
| H | 4.75975600  | 2.07279100  | 0.19070200  |
| H | 1.92173400  | -1.14048400 | -0.10326400 |
| H | 3.77976700  | -2.77521800 | -0.25813100 |
| H | 6.15003000  | -2.00250000 | -0.19020900 |
| O | 2.25441000  | 1.51581100  | 0.14335900  |
| C | -2.42389900 | 0.28932500  | -1.17905500 |
| C | -1.06677800 | 0.56915400  | -1.08982100 |
| C | -1.06642000 | 0.34273100  | 1.18041000  |
| C | -2.42352600 | 0.05069800  | 1.21303600  |
| C | -3.16088200 | 0.01769100  | 0.00191100  |
| H | -2.89393600 | 0.28504900  | -2.15559000 |
| H | -0.50083700 | 0.78091100  | -1.99604400 |
| H | -0.50022400 | 0.37138400  | 2.11045200  |
| H | -2.89330400 | -0.14622100 | 2.16965600  |
| C | -5.21030000 | -0.57301700 | 1.20907800  |
| H | -6.26413000 | -0.74564500 | 0.98322200  |
| H | -4.81171200 | -1.47826800 | 1.69037100  |
| H | -5.15085400 | 0.25469100  | 1.92921300  |
| C | -5.21058300 | -0.32175800 | -1.29779800 |
| H | -5.15051300 | 0.63224900  | -1.83955300 |
| H | -4.81271800 | -1.11395900 | -1.94908000 |
| H | -6.26455100 | -0.53483400 | -1.11039300 |
| N | -0.37153500 | 0.60148800  | 0.05970800  |
| H | 1.34570800  | 1.11732100  | 0.10781200  |
| N | -4.50341600 | -0.25818800 | -0.02548900 |

*o*-FP/MTBD(a')

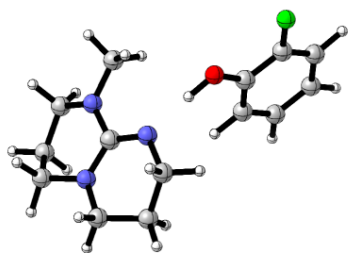

|   |             |             |             |
|---|-------------|-------------|-------------|
| C | 4.85737400  | 0.20750600  | -0.53253500 |
| C | 3.93036600  | 0.14953500  | 0.49676400  |
| C | 2.55743600  | -0.05982400 | 0.26943800  |
| C | 2.14747300  | -0.21051800 | -1.06771500 |
| C | 3.07255100  | -0.15380700 | -2.11583800 |
| C | 4.42916900  | 0.05474000  | -1.85759700 |
| H | 2.72460000  | -0.27508600 | -3.13925100 |
| O | 1.72872200  | -0.10334600 | 1.32724300  |
| H | 1.09167900  | -0.37348600 | -1.26920100 |
| C | -1.89068000 | 0.02612600  | 0.34211500  |
| N | -3.04556900 | -0.54137000 | -0.17900300 |
| N | -1.88383000 | 1.40428200  | 0.44248100  |
| C | -1.89530200 | -2.70374700 | -0.21086900 |
| H | -2.03074800 | -3.77990400 | -0.04748700 |
| H | -1.48619600 | -2.56746400 | -1.22077500 |
| C | -0.93927800 | -2.10807200 | 0.82199500  |
| H | 0.07004800  | -2.51623300 | 0.68812000  |
| H | -1.25574900 | -2.40595800 | 1.83582400  |
| C | -3.23754600 | -1.98914600 | -0.10448700 |
| H | -3.73994500 | -2.26544200 | 0.83945100  |
| H | -3.90564900 | -2.28189500 | -0.92465400 |
| C | -4.22926200 | 0.28740400  | -0.36449900 |
| H | -4.95842900 | -0.29413900 | -0.93944300 |
| H | -4.70116300 | 0.54624200  | 0.60041700  |
| C | -3.82200300 | 1.54585800  | -1.12141800 |
| H | -4.68483800 | 2.19813000  | -1.29942100 |
| H | -3.41984800 | 1.24854100  | -2.09755100 |
| C | -2.76732800 | 2.29829100  | -0.31158900 |
| H | -3.25589900 | 2.97247700  | 0.40878300  |
| H | -2.16178000 | 2.93270700  | -0.97786800 |
| C | -0.76000800 | 2.07158900  | 1.08795700  |
| H | -0.41338400 | 1.49198900  | 1.94432200  |
| H | 0.08850800  | 2.22134800  | 0.40452800  |
| H | -1.10110800 | 3.05295000  | 1.43718100  |
| N | -0.84773700 | -0.64976800 | 0.74435000  |
| H | 0.76777700  | -0.23478200 | 1.05209600  |
| H | 5.90286100  | 0.37126800  | -0.28505700 |

|   |            |            |             |
|---|------------|------------|-------------|
| H | 5.14965000 | 0.09844100 | -2.66976500 |
| F | 4.35689000 | 0.29993900 | 1.77740800  |

*m*-FP/MTBD(b')

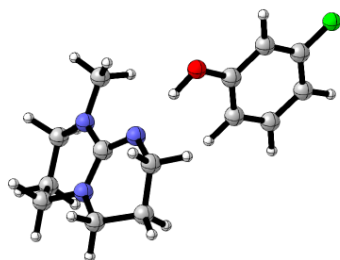

|   |             |             |             |
|---|-------------|-------------|-------------|
| C | 4.72306900  | 0.15459900  | -0.16566900 |
| C | 3.79393900  | 0.02044300  | 0.85439300  |
| C | 2.43636100  | -0.13014400 | 0.51750000  |
| C | 2.05999200  | -0.13998000 | -0.84069300 |
| C | 3.03181100  | -0.00156500 | -1.83477300 |
| C | 4.38519300  | 0.14906200  | -1.51614900 |
| H | 2.72906800  | -0.01211000 | -2.87963500 |
| O | 1.55436700  | -0.25842300 | 1.52815600  |
| H | 1.01216700  | -0.25847100 | -1.10199400 |
| H | 5.15329900  | 0.25725000  | -2.27500000 |
| C | -2.00790500 | 0.01115800  | 0.36027700  |
| N | -3.13025500 | -0.49867300 | -0.27783000 |
| N | -1.98606500 | 1.38045500  | 0.54665200  |
| C | -2.01411000 | -2.67745700 | -0.36448800 |
| H | -2.17814900 | -3.75880500 | -0.28116900 |
| H | -1.52761300 | -2.48623800 | -1.33016300 |
| C | -1.12963400 | -2.16716300 | 0.77271800  |
| H | -0.11985700 | -2.58728600 | 0.68889300  |
| H | -1.52741100 | -2.52072600 | 1.73901200  |
| C | -3.34946200 | -1.94409000 | -0.31263600 |
| H | -3.92642100 | -2.26986100 | 0.57096200  |
| H | -3.95765100 | -2.17040300 | -1.19787300 |
| C | -4.28320600 | 0.36462300  | -0.49653500 |
| H | -4.97770800 | -0.16528400 | -1.15779200 |
| H | -4.82036600 | 0.57407800  | 0.44595900  |
| C | -3.80064900 | 1.65799400  | -1.14223700 |
| H | -4.63709000 | 2.33801200  | -1.34113700 |
| H | -3.33299700 | 1.41223600  | -2.10340500 |
| C | -2.79572900 | 2.33735200  | -0.21312300 |
| H | -3.32449000 | 2.97734000  | 0.51008800  |
| H | -2.13180000 | 2.99751000  | -0.79319300 |
| C | -0.90346700 | 1.98288500  | 1.31438300  |
| H | -0.62768700 | 1.33942500  | 2.15074200  |

|   |             |             |            |
|---|-------------|-------------|------------|
| H | -0.00594300 | 2.16348800  | 0.70500600 |
| H | -1.25623900 | 2.94426300  | 1.70542900 |
| N | -1.00859400 | -0.70913900 | 0.79454700 |
| H | 0.60543900  | -0.34636300 | 1.20277200 |
| H | 4.10248300  | 0.02946800  | 1.89488000 |
| F | 6.03457800  | 0.29945000  | 0.17566300 |

*p*-FP/MTBD(c')

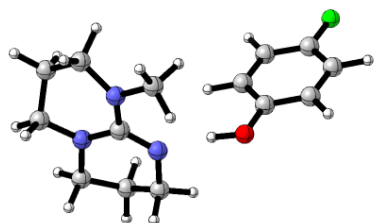

|   |             |             |             |
|---|-------------|-------------|-------------|
| C | 4.77362800  | 0.10898300  | 0.44348900  |
| C | 3.73189000  | -0.14484700 | 1.33664900  |
| C | 2.40526700  | -0.25109500 | 0.88205500  |
| C | 2.14227500  | -0.09731500 | -0.49160700 |
| C | 3.18433800  | 0.15783900  | -1.39026000 |
| C | 4.48220200  | 0.25715300  | -0.90849600 |
| H | 2.99213900  | 0.27689100  | -2.45310900 |
| O | 1.44000000  | -0.49873500 | 1.79681100  |
| H | 1.12055800  | -0.18104400 | -0.85234100 |
| C | -1.99991000 | -0.02316600 | 0.32819000  |
| N | -3.05721100 | -0.43590500 | -0.47141900 |
| N | -1.97584400 | 1.31960000  | 0.65583000  |
| C | -1.97472700 | -2.62491800 | -0.66392600 |
| H | -2.16466300 | -3.70437400 | -0.70772300 |
| H | -1.38765800 | -2.35242500 | -1.55100300 |
| C | -1.20448700 | -2.25387200 | 0.60312200  |
| H | -0.19825400 | -2.69005200 | 0.57989800  |
| H | -1.70572200 | -2.69175300 | 1.48294800  |
| C | -3.29580000 | -1.86430700 | -0.67410000 |
| H | -3.96672900 | -2.26014100 | 0.10886200  |
| H | -3.81253200 | -1.98556000 | -1.63485000 |
| C | -4.16664700 | 0.47544300  | -0.71815900 |
| H | -4.79541100 | 0.03390200  | -1.49928300 |
| H | -4.79749500 | 0.60271500  | 0.17998900  |
| C | -3.59795400 | 1.81424500  | -1.17291700 |
| H | -4.39774900 | 2.53274800  | -1.38670000 |
| H | -3.03445600 | 1.65460900  | -2.10024000 |
| C | -2.68728800 | 2.36938500  | -0.07890900 |
| H | -3.28044200 | 2.94488100  | 0.64864600  |
| H | -1.95667900 | 3.06886000  | -0.51486200 |

|   |             |             |             |
|---|-------------|-------------|-------------|
| C | -0.97119700 | 1.81237000  | 1.58962100  |
| H | -0.79058600 | 1.07730000  | 2.37482700  |
| H | -0.01347300 | 2.03610700  | 1.09735400  |
| H | -1.35090500 | 2.73479100  | 2.04433400  |
| N | -1.06315300 | -0.80924300 | 0.78639900  |
| H | 0.52472300  | -0.53050400 | 1.38563300  |
| H | 3.92921800  | -0.26562100 | 2.39834400  |
| F | 5.50097400  | 0.50668100  | -1.78508800 |
| H | 5.80124800  | 0.19185800  | 0.78639700  |

2,3-FP/MTBD(d')

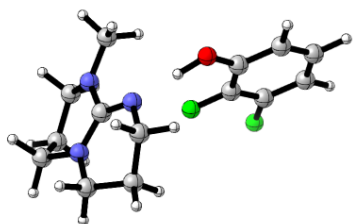

|   |             |             |             |
|---|-------------|-------------|-------------|
| C | -3.25303900 | 0.95064000  | 0.89093200  |
| C | -2.19049300 | 0.31534600  | 0.25332900  |
| C | -2.40740100 | -0.75663600 | -0.63047900 |
| C | -3.74424100 | -1.14758900 | -0.84468400 |
| C | -4.79869700 | -0.50164500 | -0.20306900 |
| C | -4.56845600 | 0.56050100  | 0.68018300  |
| H | -5.81840900 | -0.82887600 | -0.38904300 |
| O | -1.43256600 | -1.40183400 | -1.28199100 |
| H | -3.92084300 | -1.97288900 | -1.52851100 |
| C | 1.92478700  | -0.27638000 | -0.43849300 |
| N | 2.91478400  | -0.23767900 | 0.52397500  |
| N | 1.84209400  | 0.83249200  | -1.25888900 |
| C | 1.92857000  | -2.26481500 | 1.49946900  |
| H | 2.18102500  | -3.20318300 | 2.00853700  |
| H | 1.17063000  | -1.74801700 | 2.10239500  |
| C | 1.37575200  | -2.52330400 | 0.09717900  |
| H | 0.43557200  | -3.08465100 | 0.15097700  |
| H | 2.08129700  | -3.15542500 | -0.46914300 |
| C | 3.17498500  | -1.39326900 | 1.38167600  |
| H | 4.01356700  | -1.98582600 | 0.97678400  |
| H | 3.48736700  | -1.02278100 | 2.36724200  |
| C | 3.87653500  | 0.85640900  | 0.52027100  |
| H | 4.44754500  | 0.80585600  | 1.45358100  |
| H | 4.59477900  | 0.75881500  | -0.31238800 |
| C | 3.10921300  | 2.17155200  | 0.42194500  |
| H | 3.79064400  | 3.03040600  | 0.42693100  |
| H | 2.45537400  | 2.25730800  | 1.29796800  |



|   |             |             |             |
|---|-------------|-------------|-------------|
| C | 2.28266300  | 2.17464000  | -0.86533300 |
| H | 2.87746700  | 2.58265100  | -1.69652200 |
| H | 1.40426700  | 2.82894200  | -0.74906900 |
| C | 0.94460000  | 0.81268800  | -2.40535900 |
| H | 0.87853200  | -0.19848800 | -2.80871300 |
| H | -0.06827900 | 1.15431500  | -2.14752600 |
| H | 1.35130600  | 1.48334200  | -3.17252100 |
| N | 1.11442500  | -1.28395800 | -0.63325600 |
| H | -0.46745100 | -1.19391400 | -1.00435700 |
| F | -0.92641900 | 0.75479100  | 0.49002600  |
| F | -2.97244200 | 1.97678400  | 1.73073600  |
| H | -5.37189900 | 1.07811600  | 1.19423600  |

2,4-FP/MTBD(e')

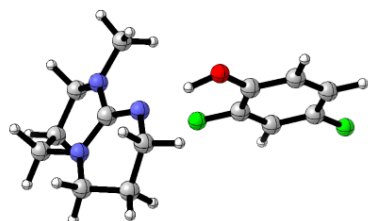

|   |             |             |             |
|---|-------------|-------------|-------------|
| C | 3.15854700  | -0.86725700 | 1.02995400  |
| C | 2.10517200  | -0.38100600 | 0.26373900  |
| C | 2.27629400  | 0.52895500  | -0.79345300 |
| C | 3.59751000  | 0.92982200  | -1.06259800 |
| C | 4.68072300  | 0.45800700  | -0.31873800 |
| C | 4.44134700  | -0.43292900 | 0.72046100  |
| H | 5.69540000  | 0.77695200  | -0.53705600 |
| O | 1.28376100  | 1.00614600  | -1.56309000 |
| H | 3.75163900  | 1.62927900  | -1.87954900 |
| C | -2.08382900 | 0.17039900  | -0.39503000 |
| N | -3.03950300 | 0.33271100  | 0.59184400  |
| N | -2.07455800 | -1.06023200 | -1.02425200 |
| C | -1.96108700 | 2.45891500  | 1.17502400  |
| H | -2.16434500 | 3.48133500  | 1.51679500  |
| H | -1.21536800 | 2.02027200  | 1.85085100  |
| C | -1.42372000 | 2.44844700  | -0.25664000 |
| H | -0.45520700 | 2.95981500  | -0.30798900 |
| H | -2.10632900 | 3.01536600  | -0.91289200 |
| C | -3.24438100 | 1.63581400  | 1.22258100  |
| H | -4.06149300 | 2.18056900  | 0.71814600  |
| H | -3.56208100 | 1.46509200  | 2.25983500  |
| C | -4.05479100 | -0.69430700 | 0.78063100  |
| H | -4.59420000 | -0.46812500 | 1.70682800  |
| H | -4.79260600 | -0.69012400 | -0.04093700 |

|   |             |             |             |
|---|-------------|-------------|-------------|
| C | -3.35721300 | -2.04768700 | 0.87456600  |
| H | -4.08015800 | -2.85724800 | 1.02936700  |
| H | -2.68375000 | -2.02977800 | 1.73975000  |
| C | -2.56938100 | -2.29714500 | -0.41290600 |
| H | -3.20771300 | -2.79935800 | -1.15561700 |
| H | -1.72184500 | -2.97201400 | -0.21302500 |
| C | -1.21344500 | -1.26972500 | -2.17994100 |
| H | -1.12107100 | -0.34332800 | -2.74806600 |
| H | -0.20673700 | -1.60622800 | -1.89360000 |
| H | -1.67038200 | -2.03966000 | -2.81405100 |
| N | -1.24159400 | 1.09382400  | -0.77578600 |
| H | 0.33575000  | 0.88229400  | -1.20797200 |
| F | 0.84630700  | -0.82173800 | 0.55394100  |
| H | 2.97557400  | -1.56790500 | 1.83821200  |
| F | 5.48635400  | -0.89963100 | 1.46018600  |

2,6-FP/MTBD(f')

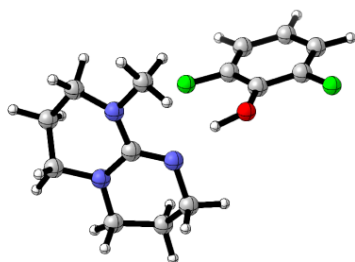

|   |             |             |             |
|---|-------------|-------------|-------------|
| C | 4.76621200  | 0.19990300  | -0.41766600 |
| C | 3.81985700  | -0.39865700 | 0.40172900  |
| C | 2.43380100  | -0.16923800 | 0.28625000  |
| C | 2.07168200  | 0.73167800  | -0.73064000 |
| C | 2.98488600  | 1.35004200  | -1.57577800 |
| C | 4.34663900  | 1.08213800  | -1.41916400 |
| H | 2.61688400  | 2.03158600  | -2.33727700 |
| O | 1.59691800  | -0.77895200 | 1.12882000  |
| C | -1.93692900 | -0.22633700 | 0.44028700  |
| N | -3.00901800 | -0.46684300 | -0.39931100 |
| N | -1.94572900 | 0.99191200  | 1.09203300  |
| C | -1.83701700 | -2.47349000 | -1.19096700 |
| H | -1.99427900 | -3.50562300 | -1.52761100 |
| H | -1.23966800 | -1.95779800 | -1.95415200 |
| C | -1.10130500 | -2.43256600 | 0.14885000  |
| H | -0.09381400 | -2.85297300 | 0.04919500  |
| H | -1.62883800 | -3.06699700 | 0.88155300  |
| C | -3.18293800 | -1.77373300 | -1.03203000 |
| H | -3.86593100 | -2.40020100 | -0.43227300 |
| H | -3.66103500 | -1.61756400 | -2.00826000 |

|   |             |             |             |
|---|-------------|-------------|-------------|
| C | -4.13028800 | 0.46267800  | -0.41232100 |
| H | -4.77742500 | 0.19762300  | -1.25543900 |
| H | -4.73535200 | 0.37961000  | 0.50757300  |
| C | -3.58027900 | 1.87652500  | -0.57246300 |
| H | -4.38872600 | 2.61655000  | -0.60028000 |
| H | -3.04208200 | 1.93185900  | -1.52626300 |
| C | -2.63833300 | 2.18348600  | 0.59312600  |
| H | -3.20439400 | 2.61201600  | 1.43410100  |
| H | -1.89590000 | 2.93916400  | 0.29084700  |
| C | -0.94801200 | 1.26752700  | 2.11676400  |
| H | -0.68718800 | 0.34719800  | 2.64059400  |
| H | -0.03033400 | 1.70394800  | 1.69723100  |
| H | -1.37704100 | 1.98112000  | 2.83113800  |
| N | -0.96778800 | -1.07261900 | 0.66961600  |
| H | 0.59721100  | -0.73420500 | 0.89667500  |
| F | 4.23326600  | -1.25264100 | 1.36863600  |
| H | 5.81552400  | -0.03354400 | -0.26273900 |
| F | 0.74360800  | 1.01443800  | -0.88393000 |
| H | 5.07507800  | 1.55677700  | -2.06976300 |

2,3,6-FP/MTBD(g')

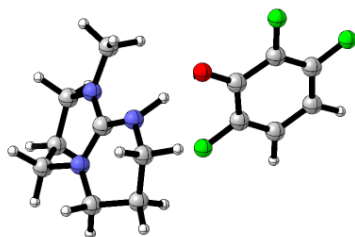

|   |             |             |             |
|---|-------------|-------------|-------------|
| C | -4.36276800 | 0.01795900  | 0.40840800  |
| C | -3.39354000 | 0.32387900  | -0.53915200 |
| C | -2.01219300 | 0.04365400  | -0.34100500 |
| C | -1.74214800 | -0.56814500 | 0.91336900  |
| C | -2.69613000 | -0.88033700 | 1.86682300  |
| C | -4.04295200 | -0.58541700 | 1.62095000  |
| H | -2.38492700 | -1.35026300 | 2.79569200  |
| O | -1.11995600 | 0.34141300  | -1.23550000 |
| C | 2.22173500  | 0.20921800  | -0.49565000 |
| N | 3.26992100  | -0.49599100 | 0.01583100  |
| N | 2.13742800  | 1.54053200  | -0.22634700 |
| C | 2.04614500  | -2.57643900 | -0.54289600 |
| H | 2.21118400  | -3.61626300 | -0.84764600 |
| H | 1.34657000  | -2.57238400 | 0.30083100  |
| C | 1.45406200  | -1.75199900 | -1.68403400 |
| H | 0.45582200  | -2.10484900 | -1.95828500 |

|   |             |             |             |
|---|-------------|-------------|-------------|
| H | 2.08716900  | -1.82407900 | -2.58169300 |
| C | 3.37662100  | -1.95586900 | -0.12756900 |
| H | 4.15649200  | -2.18689600 | -0.87002700 |
| H | 3.70969500  | -2.36488000 | 0.83498900  |
| C | 4.33436100  | 0.21334600  | 0.72347500  |
| H | 4.92925300  | -0.52969900 | 1.26282600  |
| H | 5.00473400  | 0.72093000  | 0.01156900  |
| C | 3.70051500  | 1.21649900  | 1.68337100  |
| H | 4.46582800  | 1.76871400  | 2.24024100  |
| H | 3.08400800  | 0.67180900  | 2.40859400  |
| C | 2.84723800  | 2.19395800  | 0.88002400  |
| H | 3.47813400  | 2.98778300  | 0.45252700  |
| H | 2.10872100  | 2.68322800  | 1.53018600  |
| C | 1.19944600  | 2.40029600  | -0.95346800 |
| H | 1.03203000  | 2.00830100  | -1.95759700 |
| H | 0.22745500  | 2.46518900  | -0.45262300 |
| H | 1.64575300  | 3.39879200  | -1.02520100 |
| N | 1.31116000  | -0.35420600 | -1.28166600 |
| H | 0.24919700  | -0.00562500 | -1.21536900 |
| F | -3.76922000 | 0.91178800  | -1.69760300 |
| F | -5.65806900 | 0.32175900  | 0.13178300  |
| F | -0.42106100 | -0.86743000 | 1.18651100  |
| H | -4.82424700 | -0.81213000 | 2.33816600  |

### 3,4,5-FP/MTBD(h')

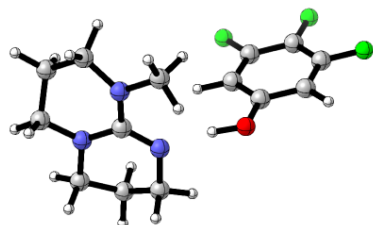

|   |             |             |             |
|---|-------------|-------------|-------------|
| C | 4.24024600  | -0.10496600 | 0.53805900  |
| C | 3.22795900  | -0.56231800 | 1.36722100  |
| C | 1.89641700  | -0.53723000 | 0.91211200  |
| C | 1.61662100  | -0.04690800 | -0.37856200 |
| C | 2.66184900  | 0.40205500  | -1.17615100 |
| C | 3.98443700  | 0.38502100  | -0.74322900 |
| O | 0.94104600  | -0.98706700 | 1.74232900  |
| C | -2.41901900 | -0.12318600 | 0.39944600  |
| N | -3.44629500 | -0.30948100 | -0.51097100 |
| N | -2.37600400 | 1.10500800  | 1.02866400  |
| C | -2.38259300 | -2.41566000 | -1.18260100 |
| H | -2.58925700 | -3.44591800 | -1.49685700 |

|   |             |             |             |
|---|-------------|-------------|-------------|
| H | -1.73273100 | -1.95893200 | -1.94068500 |
| C | -1.69163900 | -2.38370500 | 0.17994200  |
| H | -0.70013000 | -2.84845700 | 0.11794800  |
| H | -2.26729500 | -2.98702900 | 0.90215600  |
| C | -3.68689900 | -1.63273800 | -1.08700800 |
| H | -4.41931900 | -2.18985400 | -0.47706000 |
| H | -4.13337100 | -1.49095700 | -2.07960300 |
| C | -4.51997700 | 0.67204500  | -0.60026300 |
| H | -5.10678200 | 0.44489000  | -1.49698000 |
| H | -5.20285300 | 0.60652500  | 0.26542800  |
| C | -3.90020900 | 2.06107700  | -0.69533700 |
| H | -4.67239300 | 2.83462000  | -0.77755200 |
| H | -3.28253000 | 2.10652100  | -1.60052900 |
| C | -3.05161400 | 2.31396100  | 0.54837500  |
| H | -3.68460000 | 2.69440600  | 1.36529900  |
| H | -2.29980900 | 3.09116200  | 0.34169300  |
| C | -1.42213200 | 1.33283500  | 2.10676700  |
| H | -1.28785400 | 0.42256400  | 2.69248400  |
| H | -0.43887800 | 1.65684600  | 1.73600600  |
| H | -1.82221900 | 2.11940500  | 2.75718600  |
| N | -1.51841700 | -1.02517800 | 0.69638800  |
| H | 0.01178500  | -0.91628700 | 1.34073600  |
| F | 5.51963700  | -0.12649000 | 0.96889800  |
| F | 2.39672600  | 0.87354600  | -2.41558500 |
| F | 4.98368700  | 0.82616900  | -1.53304100 |
| H | 0.60137800  | -0.01885900 | -0.75984900 |
| H | 3.46236900  | -0.93726700 | 2.35790100  |

2,3,5,6-FP/MTBD(I')

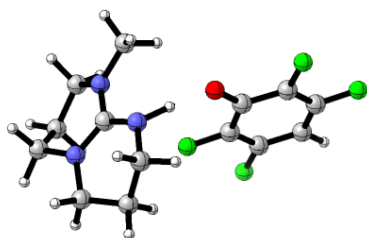

|   |             |             |             |
|---|-------------|-------------|-------------|
| C | 4.20530900  | 0.12469200  | 0.01504900  |
| C | 3.25717800  | -0.83400100 | 0.33809400  |
| C | 1.85741000  | -0.60445000 | 0.18688000  |
| C | 1.53999900  | 0.68873100  | -0.31720900 |
| C | 2.50107100  | 1.63666700  | -0.63623200 |
| C | 3.85878600  | 1.38244200  | -0.47971600 |
| O | 0.97749900  | -1.49911400 | 0.49635500  |
| C | -2.32993600 | -0.55728800 | 0.28864900  |

|   |             |             |             |
|---|-------------|-------------|-------------|
| N | -3.32294500 | -0.07184700 | -0.50314700 |
| N | -2.21845900 | -0.08905700 | 1.55886400  |
| C | -2.12989200 | -1.03773200 | -2.45160500 |
| H | -2.31414800 | -1.46873800 | -3.44221600 |
| H | -1.33819400 | -0.28549100 | -2.54847200 |
| C | -1.68515500 | -2.10628600 | -1.45430700 |
| H | -0.72541400 | -2.54766600 | -1.73666600 |
| H | -2.42351600 | -2.92076800 | -1.40569600 |
| C | -3.41187500 | -0.38828400 | -1.93814800 |
| H | -4.27220300 | -1.05524500 | -2.10098800 |
| H | -3.61339900 | 0.54572100  | -2.47814500 |
| C | -4.29398500 | 0.86143200  | 0.06856600  |
| H | -4.84446400 | 1.31922300  | -0.75822400 |
| H | -5.02219400 | 0.32350000  | 0.69527700  |
| C | -3.54160800 | 1.90988100  | 0.88480200  |
| H | -4.23149400 | 2.63841400  | 1.32513700  |
| H | -2.85762100 | 2.45212400  | 0.22118900  |
| C | -2.76506400 | 1.20403900  | 1.99377200  |
| H | -3.41816300 | 1.01528700  | 2.85833900  |
| H | -1.93573400 | 1.83461400  | 2.34256200  |
| C | -1.34606700 | -0.75088700 | 2.53216700  |
| H | -1.29545600 | -1.82050300 | 2.32278700  |
| H | -0.32628500 | -0.35134800 | 2.50823300  |
| H | -1.77783300 | -0.59878100 | 3.52772800  |
| N | -1.50310900 | -1.51395400 | -0.13013000 |
| H | -0.45691000 | -1.46605200 | 0.20003700  |
| F | 3.66331100  | -2.03271100 | 0.81345800  |
| F | 5.51741600  | -0.17157600 | 0.18606700  |
| F | 0.21635200  | 1.00568500  | -0.49194500 |
| H | 4.61066300  | 2.12152000  | -0.72916100 |
| F | 2.09591300  | 2.84386500  | -1.11160600 |

2,3,4,5,6-FP/MTBD(j')

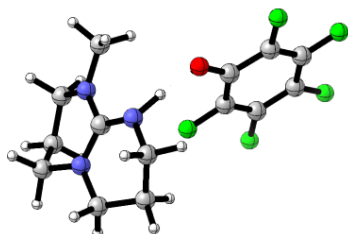

|   |             |             |             |
|---|-------------|-------------|-------------|
| C | -3.99941900 | 0.28874500  | 0.10048500  |
| C | -2.96077500 | 1.20391100  | 0.21888500  |
| C | -1.58695000 | 0.84068900  | 0.11073600  |
| C | -1.38360600 | -0.54607400 | -0.12593100 |

|   |             |             |             |
|---|-------------|-------------|-------------|
| C | -2.41385100 | -1.47201400 | -0.24765500 |
| C | -3.73898500 | -1.06274800 | -0.13507400 |
| O | -0.63323900 | 1.70678100  | 0.23207600  |
| C | 2.60890400  | 0.53409600  | 0.14047600  |
| N | 3.54223500  | -0.17767900 | -0.54598700 |
| N | 2.52423600  | 0.37766100  | 1.48692100  |
| C | 2.33235500  | 0.39579200  | -2.63381200 |
| H | 2.50213300  | 0.58373400  | -3.70002000 |
| H | 1.50453900  | -0.31709000 | -2.54082400 |
| C | 1.97175800  | 1.68254100  | -1.89373200 |
| H | 1.02248100  | 2.09745400  | -2.24359800 |
| H | 2.74596700  | 2.44849600  | -2.05104100 |
| C | 3.60015000  | -0.18788700 | -2.01685000 |
| H | 4.48320400  | 0.38361400  | -2.34130100 |
| H | 3.74376300  | -1.22638200 | -2.34126400 |
| C | 4.49423000  | -1.00490100 | 0.19583100  |
| H | 4.98040200  | -1.67599400 | -0.51798300 |
| H | 5.27800600  | -0.37856200 | 0.64974200  |
| C | 3.73394200  | -1.78682600 | 1.26422900  |
| H | 4.41003800  | -2.42780300 | 1.84088300  |
| H | 2.99534400  | -2.43192600 | 0.77366400  |
| C | 3.04440200  | -0.79735700 | 2.19983500  |
| H | 3.74909600  | -0.43885900 | 2.96450300  |
| H | 2.21171700  | -1.28339700 | 2.72642700  |
| C | 1.72917300  | 1.29786800  | 2.30458500  |
| H | 1.72769800  | 2.29215300  | 1.85510000  |
| H | 0.68903500  | 0.96813400  | 2.40112300  |
| H | 2.19276000  | 1.35174200  | 3.29587400  |
| N | 1.81374000  | 1.41497200  | -0.46508900 |
| H | 0.78442700  | 1.51312500  | -0.10029200 |
| F | -3.26902900 | 2.49817000  | 0.44675500  |
| F | -5.27743100 | 0.70162000  | 0.21220200  |
| F | -0.09745500 | -1.00178800 | -0.24002100 |
| F | -2.12909100 | -2.77288900 | -0.47321200 |
| F | -4.74967900 | -1.95093100 | -0.25134200 |

*o*-FP/DMAP(a)\_Int1

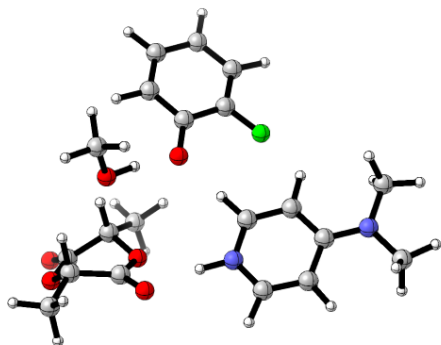

|   |             |             |             |
|---|-------------|-------------|-------------|
| O | -1.85718900 | 1.20273800  | 0.90097300  |
| C | -2.14704100 | 2.10011400  | -0.03606600 |
| O | -1.28133000 | 2.86223900  | -0.43643900 |
| H | -3.04575600 | -1.44946400 | 2.58178200  |
| C | -2.33694000 | -0.64748000 | 2.35885700  |
| H | -2.24183700 | -0.01330300 | 3.24617600  |
| H | -1.36870600 | -1.08600500 | 2.10357800  |
| C | -2.84191900 | 0.14874000  | 1.17487100  |
| H | -2.88688000 | -0.47954200 | 0.27520300  |
| C | -3.58277700 | 2.10185100  | -0.53574700 |
| H | -3.63745600 | 1.27348900  | -1.25632900 |
| O | -4.49006400 | 1.83194100  | 0.56739200  |
| C | -4.21043000 | 0.79131700  | 1.39212400  |
| O | -5.00796000 | 0.43538600  | 2.21925900  |
| C | -4.00783500 | 3.41231200  | -1.17071100 |
| H | -3.94201300 | 4.23537700  | -0.45204200 |
| H | -3.35844600 | 3.63599500  | -2.02141800 |
| H | -5.04106000 | 3.32836100  | -1.52006300 |
| C | 3.60398800  | 2.83280300  | 0.03914500  |
| C | 2.25282600  | 3.05316900  | -0.07723100 |
| C | 1.79487600  | 0.73568200  | -0.12584700 |
| C | 3.13856000  | 0.45132000  | -0.00914100 |
| C | 4.10132000  | 1.49364100  | 0.08161400  |
| H | 4.26369900  | 3.68886100  | 0.09967600  |
| H | 1.82542600  | 4.05012400  | -0.11023000 |
| H | 1.03283900  | -0.06010900 | -0.20869700 |
| H | 3.41415800  | -0.59438800 | 0.01985300  |
| C | 5.90003500  | -0.15477800 | 0.24688500  |
| H | 6.98439900  | -0.15493900 | 0.36429500  |
| H | 5.46120300  | -0.69913600 | 1.09219500  |
| H | 5.65260100  | -0.69048800 | -0.67842600 |
| C | 6.39543700  | 2.32206000  | 0.28715700  |
| H | 6.21281800  | 2.95570900  | 1.16552600  |
| H | 7.39777800  | 1.90169000  | 0.37696700  |
| H | 6.37056000  | 2.95205500  | -0.61224900 |



|   |             |             |             |
|---|-------------|-------------|-------------|
| N | 1.37775200  | 2.02611100  | -0.15705400 |
| H | 0.36813600  | 2.24682700  | -0.23354300 |
| C | 1.23194300  | -4.61400200 | 0.45430700  |
| C | 1.05994900  | -3.25970100 | 0.22691500  |
| C | -0.09908900 | -2.67631600 | -0.35290000 |
| C | -1.10788300 | -3.62115100 | -0.69576400 |
| C | -0.95646200 | -4.99188900 | -0.47696700 |
| C | 0.21057800  | -5.50657400 | 0.09932900  |
| H | 2.15921000  | -4.95915700 | 0.90644600  |
| H | -1.76279700 | -5.66660200 | -0.75968000 |
| O | -0.21511200 | -1.38767300 | -0.54063500 |
| C | -2.01773200 | -0.64630600 | -3.31921300 |
| H | -2.82670000 | -0.13664400 | -3.85800200 |
| H | -2.14178300 | -1.73099100 | -3.46536900 |
| H | -1.06086200 | -0.34772300 | -3.77739600 |
| O | -2.08845000 | -0.28177200 | -1.95325800 |
| H | -1.35968800 | -0.76549200 | -1.44667500 |
| H | -2.02270600 | -3.23654200 | -1.14344800 |
| N | 5.42756900  | 1.23087700  | 0.20366000  |
| H | 0.32940900  | -6.57276700 | 0.27160200  |
| F | 2.09106900  | -2.40842900 | 0.58733100  |

*m*-FP/DMAP(b)\_Int1

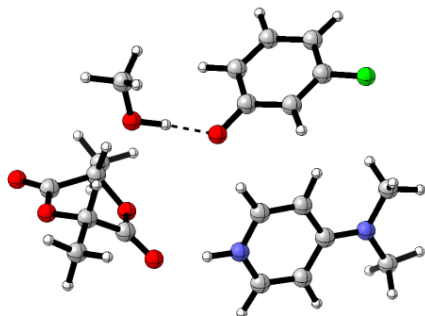

|   |             |             |             |
|---|-------------|-------------|-------------|
| O | -2.61317500 | 1.18366300  | 0.72651900  |
| C | -2.79975000 | 1.36675200  | -0.57885300 |
| O | -2.03670100 | 2.07944800  | -1.21210100 |
| H | -3.76600500 | -0.44606800 | 3.42925600  |
| C | -3.17804300 | 0.30443100  | 2.89398300  |
| H | -3.46796900 | 1.29415200  | 3.26113800  |
| H | -2.11634600 | 0.13610000  | 3.09766100  |
| C | -3.43955300 | 0.17288500  | 1.40832500  |
| H | -3.11885500 | -0.80858800 | 1.02338700  |
| C | -3.97989500 | 0.63191500  | -1.19044800 |
| H | -3.65550800 | -0.41816400 | -1.28739900 |
| O | -5.11182400 | 0.68798100  | -0.27645500 |
| C | -4.90252500 | 0.37515000  | 1.02407800  |

|   |             |             |             |
|---|-------------|-------------|-------------|
| O | -5.82631800 | 0.26902800  | 1.78844200  |
| C | -4.43370300 | 1.19727800  | -2.52210900 |
| H | -4.74710400 | 2.24123200  | -2.42135200 |
| H | -3.61278500 | 1.14443600  | -3.24242200 |
| H | -5.27526200 | 0.60763500  | -2.89705500 |
| C | 2.61962600  | 3.50884300  | 0.02834500  |
| C | 1.28060900  | 3.47714600  | -0.27830100 |
| C | 1.30555400  | 1.12603500  | -0.49168600 |
| C | 2.64801100  | 1.09041900  | -0.18607200 |
| C | 3.36430500  | 2.28929600  | 0.08835300  |
| H | 3.08175800  | 4.46840300  | 0.22197800  |
| H | 0.67577400  | 4.37662300  | -0.33068200 |
| H | 0.72737700  | 0.20982500  | -0.69855000 |
| H | 3.12209800  | 0.11736600  | -0.16413500 |
| C | 5.41091700  | 0.99956100  | 0.44716300  |
| H | 6.45122100  | 1.19813000  | 0.70702900  |
| H | 4.98626900  | 0.33122300  | 1.20612700  |
| H | 5.38905000  | 0.48474400  | -0.52102000 |
| C | 5.39712700  | 3.51800500  | 0.67120200  |
| H | 4.97450100  | 4.03627700  | 1.54246300  |
| H | 6.44089400  | 3.28848000  | 0.88800600  |
| H | 5.37056400  | 4.19820100  | -0.19063200 |
| N | 0.64608800  | 2.31059200  | -0.53165900 |
| H | -0.36797800 | 2.30408900  | -0.74644900 |
| C | 3.32802800  | -3.10461900 | -0.42357000 |
| C | 2.29040000  | -2.36842800 | -0.97448700 |
| C | 1.03319900  | -2.28712000 | -0.29956500 |
| C | 0.92355200  | -3.01697800 | 0.92406500  |
| C | 1.99202400  | -3.75200400 | 1.43148200  |
| C | 3.23112500  | -3.80894600 | 0.77202800  |
| H | 1.86811700  | -4.29507400 | 2.36715300  |
| O | 0.06289400  | -1.55394100 | -0.77678800 |
| C | -2.71391000 | -3.44150200 | -0.91451300 |
| H | -3.79234800 | -3.62575800 | -0.83340300 |
| H | -2.19243200 | -4.15334800 | -0.25636800 |
| H | -2.40487500 | -3.64420700 | -1.95164300 |
| O | -2.45972100 | -2.09588400 | -0.54375700 |
| H | -1.46491400 | -1.92251400 | -0.61471800 |
| H | -0.02291800 | -2.98027300 | 1.45950400  |
| N | 4.68477100  | 2.27298200  | 0.39172900  |
| H | 4.07288200  | -4.37770500 | 1.15347200  |
| F | 4.52518100  | -3.13431700 | -1.10131000 |
| H | 2.41834500  | -1.87245700 | -1.93345100 |

*p*-FP/DMAP(c)\_Int1

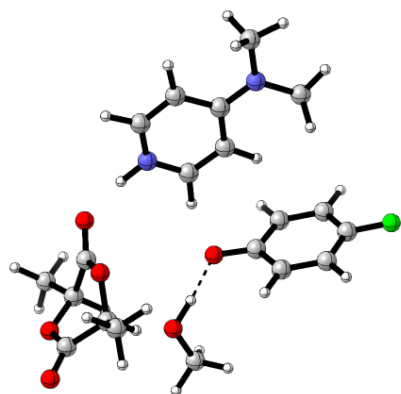

|   |             |             |             |
|---|-------------|-------------|-------------|
| O | -2.73742900 | 1.16513800  | 0.73443100  |
| C | -2.89859400 | 1.24731800  | -0.58523600 |
| O | -2.18294800 | 1.98548800  | -1.24373900 |
| H | -3.84031800 | -0.37262100 | 3.51093100  |
| C | -3.29987500 | 0.38815000  | 2.94121000  |
| H | -3.68459200 | 1.37156900  | 3.22983800  |
| H | -2.23539800 | 0.32697800  | 3.18694000  |
| C | -3.49815500 | 0.13448400  | 1.46150000  |
| H | -3.08377300 | -0.83977500 | 1.15478100  |
| C | -3.98861100 | 0.37008800  | -1.17600200 |
| H | -3.57565200 | -0.65336200 | -1.18795000 |
| O | -5.15150000 | 0.38961300  | -0.29948500 |
| C | -4.95947200 | 0.18279200  | 1.02426100  |
| O | -5.89541300 | 0.04747500  | 1.76923600  |
| C | -4.44345400 | 0.80011400  | -2.55680400 |
| H | -4.84705700 | 1.81748900  | -2.54063300 |
| H | -3.59694100 | 0.76814300  | -3.24813600 |
| H | -5.21878100 | 0.11481200  | -2.91135200 |
| C | 2.51175500  | 1.18818000  | -0.28802600 |
| C | 1.16743400  | 1.20712100  | -0.58728200 |
| C | 1.09069200  | 3.54683600  | -0.27964500 |
| C | 2.42939700  | 3.59495800  | 0.02605300  |
| C | 3.20064900  | 2.39037100  | 0.03744200  |
| H | 3.00852800  | 0.22648800  | -0.30826600 |
| H | 0.60713300  | 0.28561800  | -0.81995600 |
| H | 0.46645300  | 4.43436300  | -0.29452000 |
| H | 2.87085600  | 4.55563000  | 0.25845000  |
| C | 5.20476900  | 3.64023800  | 0.67362800  |
| H | 6.25374100  | 3.42596700  | 0.88078100  |
| H | 5.16190100  | 4.35370800  | -0.16017600 |
| H | 4.77158900  | 4.11359500  | 1.56509400  |
| C | 5.27388400  | 1.13305800  | 0.35627000  |
| H | 5.27478200  | 0.65984200  | -0.63326000 |

|   |             |             |             |
|---|-------------|-------------|-------------|
| H | 6.30622700  | 1.34257700  | 0.63837300  |
| H | 4.85464300  | 0.42376100  | 1.07993900  |
| N | 0.48176000  | 2.37725700  | -0.57764700 |
| H | -0.53259300 | 2.34927200  | -0.78685500 |
| C | 3.45570600  | -2.88080100 | -1.07807500 |
| C | 2.24490200  | -2.29625300 | -1.46248200 |
| C | 1.16401900  | -2.12186500 | -0.54795700 |
| C | 1.37974400  | -2.60254200 | 0.77754800  |
| C | 2.58693700  | -3.19075300 | 1.16550300  |
| C | 3.61281400  | -3.31286700 | 0.23453300  |
| H | 4.26811900  | -3.01385300 | -1.78945500 |
| H | 2.73615200  | -3.55203800 | 2.18058900  |
| O | 0.05911000  | -1.51120900 | -0.90753700 |
| C | -2.52700600 | -3.60473400 | -0.48006400 |
| H | -3.57419300 | -3.85182300 | -0.26552200 |
| H | -1.88847000 | -4.20457600 | 0.18687500  |
| H | -2.30794300 | -3.89784100 | -1.51853100 |
| O | -2.34301400 | -2.21330900 | -0.27684200 |
| H | -1.38095000 | -1.97711800 | -0.49345700 |
| H | 0.57313300  | -2.49584300 | 1.50047600  |
| H | 2.09967900  | -1.96606600 | -2.48931900 |
| F | 4.80683500  | -3.87955600 | 0.61779700  |
| N | 4.52060400  | 2.39162500  | 0.34441700  |

2,3-FP/DMAP(d)\_Int1

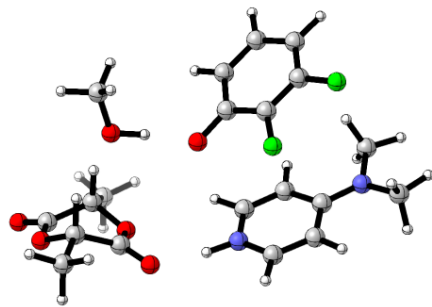

|   |             |             |             |
|---|-------------|-------------|-------------|
| O | -2.94335700 | 0.93073100  | 0.81548100  |
| C | -3.06478800 | 1.22624200  | -0.48094800 |
| O | -2.31537500 | 2.03631200  | -0.99647500 |
| H | -4.17867000 | -0.97949800 | 3.28794700  |
| C | -3.59431100 | -0.16142800 | 2.85830300  |
| H | -3.95652800 | 0.78024500  | 3.28294700  |
| H | -2.54199700 | -0.30025400 | 3.12409300  |
| C | -3.74872300 | -0.17764500 | 1.35147900  |
| H | -3.34034000 | -1.10193800 | 0.91315900  |
| C | -4.16027200 | 0.48441500  | -1.22883500 |
| H | -3.76255000 | -0.52873400 | -1.39978100 |

|   |             |             |             |
|---|-------------|-------------|-------------|
| O | -5.34605000 | 0.38811300  | -0.39056600 |
| C | -5.19552200 | -0.02856500 | 0.88838700  |
| O | -6.15480300 | -0.26128500 | 1.57718900  |
| C | -4.56880600 | 1.14456100  | -2.53120100 |
| H | -4.95146200 | 2.15504000  | -2.35661400 |
| H | -3.70472300 | 1.20638000  | -3.19828000 |
| H | -5.34878200 | 0.54645300  | -3.01127200 |
| C | 2.01016200  | 1.26782400  | 1.27520300  |
| C | 0.69384200  | 1.40441500  | 0.90096100  |
| C | 1.28021200  | 2.86663300  | -0.84510000 |
| C | 2.61463300  | 2.75682300  | -0.54457100 |
| C | 3.03606300  | 1.91745200  | 0.53239000  |
| H | 2.24027300  | 0.59877400  | 2.09291900  |
| H | -0.11342800 | 0.87715900  | 1.39059400  |
| H | 0.91802000  | 3.46806600  | -1.67188300 |
| H | 3.32709900  | 3.28511000  | -1.16395600 |
| C | 5.37873200  | 2.30244300  | -0.04836500 |
| H | 6.35890600  | 2.05716500  | 0.36204400  |
| H | 5.31716900  | 1.88970900  | -1.06415400 |
| H | 5.29852200  | 3.39543100  | -0.09790300 |
| C | 4.74525700  | 0.79166400  | 1.86796500  |
| H | 4.43613000  | -0.23306500 | 1.62353300  |
| H | 5.83141500  | 0.81260400  | 1.96513400  |
| H | 4.31398000  | 1.07694500  | 2.83520200  |
| N | 0.34300300  | 2.20766300  | -0.12920900 |
| H | -0.64648900 | 2.22826200  | -0.42306700 |
| C | 3.61679000  | -1.93787900 | -0.66134700 |
| C | 2.40286300  | -1.29573300 | -0.86083200 |
| C | 1.21722700  | -1.65698800 | -0.14889500 |
| C | 1.39120900  | -2.73619500 | 0.77360000  |
| C | 2.61579100  | -3.37711000 | 0.95355800  |
| C | 3.76078500  | -2.98789400 | 0.24220600  |
| H | 2.68874200  | -4.19957600 | 1.66248200  |
| O | 0.10577100  | -1.01887900 | -0.32239300 |
| C | -2.18111500 | -3.35151400 | -1.26294700 |
| H | -3.20004400 | -3.72631200 | -1.41834400 |
| H | -1.64462700 | -4.06914000 | -0.62335900 |
| H | -1.67303700 | -3.31370000 | -2.23879400 |
| O | -2.26557000 | -2.06824500 | -0.66348900 |
| H | -1.33505300 | -1.71559600 | -0.52542300 |
| H | 0.51657200  | -3.05090600 | 1.33941500  |
| N | 4.34701500  | 1.73676200  | 0.82120400  |
| H | 4.72243800  | -3.47686900 | 0.36030300  |
| F | 4.70261000  | -1.50646700 | -1.37113400 |

F 2.34774900 -0.27751300 -1.76608100

2,4-FP/DMAP(e)\_Int1

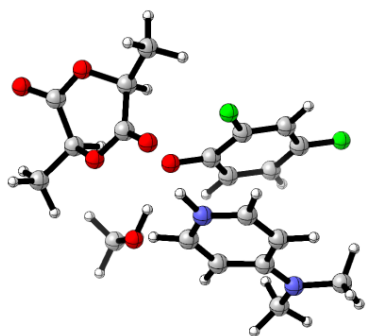

|   |             |             |             |
|---|-------------|-------------|-------------|
| O | -2.97125600 | 0.78244300  | -1.00367100 |
| C | -2.70701900 | -0.46555200 | -1.38892200 |
| O | -2.10495000 | -0.66954400 | -2.42939800 |
| H | -4.25746300 | 2.62615600  | 1.48929400  |
| C | -3.85714800 | 2.44560200  | 0.48785800  |
| H | -4.62430200 | 2.72172800  | -0.24265200 |
| H | -2.96404800 | 3.05962000  | 0.34137000  |
| C | -3.48634800 | 0.98294200  | 0.35707300  |
| H | -2.66319100 | 0.71436300  | 1.03584800  |
| C | -3.18981400 | -1.56393100 | -0.45478600 |
| H | -2.45355200 | -1.59646900 | 0.36145000  |
| O | -4.49004600 | -1.21283800 | 0.09380800  |
| C | -4.65358000 | 0.03074000  | 0.60389000  |
| O | -5.65541500 | 0.32268000  | 1.20375400  |
| C | -3.32084800 | -2.92089300 | -1.11844700 |
| H | -4.03271800 | -2.88321700 | -1.94900200 |
| H | -2.34594300 | -3.23635400 | -1.49756900 |
| H | -3.67059600 | -3.65028700 | -0.38204500 |
| C | 1.88052200  | 1.74719300  | -1.01528300 |
| C | 0.62403700  | 1.44308600  | -1.47893100 |
| C | 1.47547000  | -0.28680000 | -2.83023300 |
| C | 2.75818800  | -0.03686200 | -2.41051600 |
| C | 3.00692200  | 0.99363400  | -1.45101900 |
| H | 1.94884800  | 2.52297900  | -0.26460200 |
| H | -0.25633000 | 1.96439200  | -1.12417900 |
| H | 1.23374400  | -1.08728700 | -3.52091200 |
| H | 3.55409200  | -0.66452800 | -2.78917100 |
| C | 5.37125300  | 0.37386500  | -1.35618800 |
| H | 6.28546700  | 0.76409300  | -0.90730200 |
| H | 5.23024900  | -0.65938300 | -1.01041700 |
| H | 5.50683100  | 0.37151400  | -2.44446100 |
| C | 4.44274800  | 2.20163000  | 0.11117300  |

|   |             |             |             |
|---|-------------|-------------|-------------|
| H | 3.89376300  | 1.90502900  | 1.01423900  |
| H | 5.50545400  | 2.25631600  | 0.35056200  |
| H | 4.11106500  | 3.20045700  | -0.19613600 |
| N | 0.43466000  | 0.44854300  | -2.37819900 |
| H | -0.52997700 | 0.15994200  | -2.60146400 |
| C | 1.92195300  | -2.59497100 | 1.01306000  |
| C | 0.80892700  | -1.81802000 | 0.72696400  |
| C | 0.49711400  | -0.57511600 | 1.34942200  |
| C | 1.44894900  | -0.17843200 | 2.33392500  |
| C | 2.58390100  | -0.93443100 | 2.65077200  |
| C | 2.80857100  | -2.12913500 | 1.98078700  |
| H | 3.28044300  | -0.60664500 | 3.41848100  |
| O | -0.55053900 | 0.12683200  | 1.02019800  |
| C | -0.55272100 | 3.34881800  | 2.39844200  |
| H | -0.46578400 | 4.43659100  | 2.29060700  |
| H | 0.17221900  | 3.02404400  | 3.16345400  |
| H | -1.56379900 | 3.12404800  | 2.77507100  |
| O | -0.30374900 | 2.75893900  | 1.13731700  |
| H | -0.39949200 | 1.76413400  | 1.20411400  |
| H | 1.26076600  | 0.75177800  | 2.86527700  |
| N | 4.25056000  | 1.23029700  | -0.96871400 |
| F | -0.05377900 | -2.28323600 | -0.23773600 |
| F | 3.92049100  | -2.87745800 | 2.27323400  |
| H | 2.08847100  | -3.53695700 | 0.49873800  |

2,6-FP/DMAP(f)\_Int1

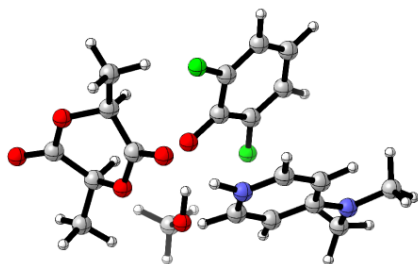

|   |            |             |             |
|---|------------|-------------|-------------|
| O | 2.67751000 | 0.68946900  | 1.22097200  |
| C | 2.64602500 | -0.63915100 | 1.31417500  |
| O | 2.02096200 | -1.17481300 | 2.21415300  |
| H | 3.74016700 | 3.23965000  | -0.68641400 |
| C | 3.31264100 | 2.77608800  | 0.20698700  |
| H | 3.96264800 | 3.00712000  | 1.05722800  |
| H | 2.30886500 | 3.17635200  | 0.37224900  |
| C | 3.22218000 | 1.27948000  | -0.01001200 |
| H | 2.50235000 | 1.03576100  | -0.80591800 |
| C | 3.41516400 | -1.40026500 | 0.24634000  |
| H | 2.76216500 | -1.41634900 | -0.63735300 |

|   |             |             |             |
|---|-------------|-------------|-------------|
| O | 4.64156800  | -0.69568100 | -0.08452100 |
| C | 4.56762100  | 0.63302200  | -0.33491200 |
| O | 5.51525900  | 1.22681600  | -0.77944200 |
| C | 3.78934400  | -2.81273200 | 0.65337100  |
| H | 4.42339900  | -2.80740200 | 1.54557900  |
| H | 2.88182600  | -3.38356300 | 0.86377700  |
| H | 4.33117900  | -3.29268000 | -0.16667100 |
| C | -2.10578100 | 1.23322000  | 1.28181300  |
| C | -0.84021500 | 0.87605700  | 1.67663100  |
| C | -1.62582400 | -1.15438600 | 2.57233300  |
| C | -2.91556200 | -0.86324900 | 2.20342100  |
| C | -3.20107700 | 0.35426800  | 1.50916100  |
| H | -2.20135000 | 2.16014100  | 0.73253500  |
| H | 0.02046600  | 1.49901900  | 1.46940400  |
| H | -1.35636800 | -2.08299700 | 3.06391500  |
| H | -3.68713600 | -1.59242100 | 2.41316600  |
| C | -5.54534500 | -0.29690300 | 1.26483100  |
| H | -6.46932700 | 0.15288800  | 0.89933200  |
| H | -5.37295900 | -1.23062000 | 0.71183600  |
| H | -5.68473600 | -0.53344400 | 2.32706000  |
| C | -4.67457300 | 1.85153700  | 0.26321400  |
| H | -4.06296800 | 1.83448800  | -0.64710400 |
| H | -5.72654700 | 1.88986300  | -0.02244600 |
| H | -4.44135300 | 2.76042800  | 0.83185200  |
| N | -0.61336700 | -0.29372000 | 2.31976700  |
| H | 0.36395900  | -0.57654100 | 2.49454000  |
| C | -1.30039100 | -2.96083600 | -1.93353800 |
| C | -0.39236600 | -2.04121800 | -1.43346400 |
| C | -0.53537600 | -0.62264200 | -1.47959300 |
| C | -1.76220200 | -0.24698200 | -2.10421400 |
| C | -2.70172400 | -1.12537600 | -2.62389700 |
| C | -2.47787400 | -2.50524600 | -2.54027600 |
| H | -3.59195600 | -0.72043000 | -3.09951500 |
| O | 0.33319600  | 0.20595700  | -0.99742200 |
| C | -0.02794100 | 3.68529300  | -1.67959700 |
| H | -0.12448000 | 4.71684200  | -1.31989300 |
| H | -0.87351300 | 3.46611800  | -2.34836800 |
| H | 0.90123800  | 3.61621300  | -2.26868200 |
| O | -0.01042700 | 2.82790300  | -0.55171600 |
| H | 0.05004100  | 1.88302000  | -0.85665800 |
| N | -4.44929900 | 0.65130300  | 1.07542000  |
| F | 0.75148800  | -2.52620000 | -0.84239300 |
| H | -1.07472200 | -4.02095400 | -1.84943200 |
| F | -2.02385000 | 1.10039800  | -2.20001400 |



H                    -3.19587400   -3.20843800   -2.95150100

2,3,6-FP/DMAP(g)\_Int1

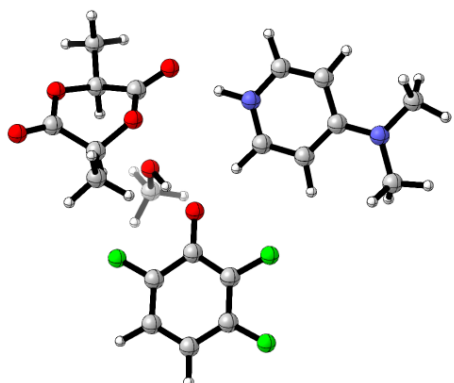

|   |             |             |             |
|---|-------------|-------------|-------------|
| O | -2.02658600 | 1.31280300  | 0.92898000  |
| C | -2.30576100 | 2.23839300  | 0.01798900  |
| O | -1.45392400 | 3.05157000  | -0.30593000 |
| H | -3.19342900 | -1.43485300 | 2.46418400  |
| C | -2.51655700 | -0.58976200 | 2.31479900  |
| H | -2.51358900 | 0.01971100  | 3.22419700  |
| H | -1.51121900 | -0.97036400 | 2.11661400  |
| C | -2.98484700 | 0.21509900  | 1.12141000  |
| H | -2.95360100 | -0.39361800 | 0.20756000  |
| C | -3.71169000 | 2.20607100  | -0.55888500 |
| H | -3.69300600 | 1.40706400  | -1.31333500 |
| O | -4.66494400 | 1.85632900  | 0.48031000  |
| C | -4.38755400 | 0.79691100  | 1.28167500  |
| O | -5.21364100 | 0.38025700  | 2.05027700  |
| C | -4.15495100 | 3.52383400  | -1.16562500 |
| H | -4.15994200 | 4.31942500  | -0.41377300 |
| H | -3.47159800 | 3.80542000  | -1.97129200 |
| H | -5.16437900 | 3.41452100  | -1.57275700 |
| C | 3.40887400  | 3.35762200  | 0.21148300  |
| C | 2.04406300  | 3.48713800  | 0.11803900  |
| C | 1.75959800  | 1.15881400  | -0.14764500 |
| C | 3.12041800  | 0.96313500  | -0.05974800 |
| C | 4.00512400  | 2.06161600  | 0.12565200  |
| H | 4.00394100  | 4.25100300  | 0.35101500  |
| H | 1.54451200  | 4.44859300  | 0.17873100  |
| H | 1.05923200  | 0.32120100  | -0.29235900 |
| H | 3.47480500  | -0.05601400 | -0.13456900 |
| C | 5.92131600  | 0.54209000  | 0.12603400  |
| H | 7.00481500  | 0.61284200  | 0.22810900  |
| H | 5.54131100  | -0.10842800 | 0.92342800  |
| H | 5.69527000  | 0.07592300  | -0.84114500 |

|   |             |             |             |
|---|-------------|-------------|-------------|
| C | 6.23314000  | 3.03427900  | 0.40390100  |
| H | 6.01268000  | 3.56399800  | 1.34040800  |
| H | 7.26440700  | 2.68259200  | 0.44969700  |
| H | 6.15288800  | 3.74468800  | -0.42983200 |
| N | 1.24576000  | 2.41048000  | -0.05619700 |
| H | 0.22082000  | 2.56044700  | -0.11641300 |
| C | 1.60813700  | -4.29144400 | 0.17997700  |
| C | 1.39333600  | -2.94980300 | -0.10865300 |
| C | 0.10153000  | -2.38979800 | -0.31114800 |
| C | -0.94031100 | -3.35355000 | -0.17988900 |
| C | -0.74523500 | -4.69342600 | 0.10432400  |
| C | 0.55363900  | -5.18921500 | 0.29174500  |
| H | -1.60916100 | -5.34768900 | 0.18127200  |
| O | -0.09330600 | -1.13731800 | -0.57564200 |
| C | -2.21650600 | -0.69950400 | -3.23476400 |
| H | -2.99513300 | -0.16817800 | -3.79605700 |
| H | -2.54209600 | -1.74135100 | -3.09373900 |
| H | -1.29828400 | -0.70093000 | -3.84301900 |
| O | -2.02853100 | -0.03312200 | -1.99739200 |
| H | -1.32033500 | -0.51493400 | -1.48588900 |
| N | 5.34728800  | 1.88729300  | 0.21663000  |
| F | 2.47741800  | -2.12051900 | -0.20692100 |
| F | -2.22297000 | -2.89860000 | -0.35063500 |
| H | 0.74664200  | -6.23234400 | 0.51694100  |
| F | 2.88844000  | -4.72069200 | 0.35423700  |

### 3,4,5-FP/DMAP(h)\_Int1

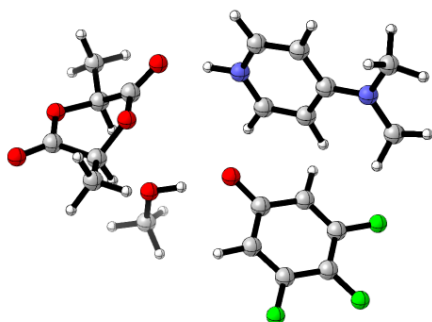

|   |             |             |             |
|---|-------------|-------------|-------------|
| O | -3.03760300 | 0.93860200  | 0.80318400  |
| C | -3.27797800 | 1.19950500  | -0.47976600 |
| O | -2.64566800 | 2.07082000  | -1.05617300 |
| H | -3.87258300 | -1.06735500 | 3.36675200  |
| C | -3.41850700 | -0.19284700 | 2.89299600  |
| H | -3.85110300 | 0.70581200  | 3.34416500  |
| H | -2.33992500 | -0.20963700 | 3.07575800  |
| C | -3.68546100 | -0.24052600 | 1.40317700  |

|   |             |             |             |
|---|-------------|-------------|-------------|
| H | -3.22318100 | -1.12402500 | 0.93454600  |
| C | -4.34590600 | 0.34704400  | -1.14334500 |
| H | -3.86682700 | -0.62744000 | -1.33650600 |
| O | -5.45226700 | 0.14871700  | -0.21895100 |
| C | -5.16980700 | -0.23721900 | 1.04794600  |
| O | -6.04952800 | -0.55101400 | 1.80672200  |
| C | -4.90983300 | 0.94825300  | -2.41603500 |
| H | -5.37654300 | 1.91881300  | -2.22033300 |
| H | -4.10674600 | 1.08468300  | -3.14538100 |
| H | -5.65981800 | 0.27067700  | -2.83416400 |
| C | 1.74524100  | 4.12683200  | 0.26100100  |
| C | 0.41961600  | 3.90353000  | -0.02261200 |
| C | 0.82900100  | 1.63335000  | -0.52116400 |
| C | 2.16943400  | 1.79096700  | -0.24814300 |
| C | 2.68574200  | 3.05414200  | 0.15854000  |
| H | 2.04740600  | 5.12157400  | 0.56246000  |
| H | -0.32850700 | 4.68653500  | 0.04654200  |
| H | 0.40338800  | 0.66369400  | -0.82281300 |
| H | 2.80092400  | 0.91811500  | -0.35335600 |
| C | 4.93132800  | 2.10030600  | 0.32845400  |
| H | 5.93312400  | 2.44391800  | 0.58781500  |
| H | 4.65630200  | 1.28965300  | 1.01432200  |
| H | 4.95799900  | 1.70088700  | -0.69262100 |
| C | 4.50217900  | 4.53483900  | 0.85815500  |
| H | 4.03183800  | 4.86208700  | 1.79506500  |
| H | 5.57723400  | 4.46398600  | 1.02609400  |
| H | 4.32775700  | 5.29931300  | 0.08946700  |
| N | -0.02078200 | 2.68360600  | -0.40440400 |
| H | -1.02747700 | 2.52837100  | -0.59870000 |
| C | 3.53312300  | -2.21785600 | -0.97769100 |
| C | 2.35432100  | -1.64035500 | -1.42411600 |
| C | 1.14419000  | -1.77976500 | -0.67534300 |
| C | 1.22078600  | -2.55484300 | 0.52252200  |
| C | 2.42072500  | -3.11807200 | 0.92461000  |
| C | 3.60244800  | -2.96234800 | 0.19837000  |
| O | 0.04545500  | -1.19555000 | -1.06033200 |
| C | -2.42824700 | -3.47795200 | -1.21100600 |
| H | -3.46124700 | -3.83038300 | -1.10341000 |
| H | -1.77453800 | -4.14662700 | -0.63046500 |
| H | -2.14421500 | -3.55459900 | -2.27169600 |
| O | -2.36237300 | -2.13851600 | -0.74483100 |
| H | -1.41610300 | -1.80768500 | -0.84848200 |
| N | 4.00000500  | 3.22856900  | 0.43530300  |
| F | 4.67570000  | -2.05713300 | -1.69985000 |

|   |            |             |             |
|---|------------|-------------|-------------|
| H | 0.33460700 | -2.69950100 | 1.13356900  |
| H | 2.34476200 | -1.09876400 | -2.36588400 |
| F | 2.47363800 | -3.83989400 | 2.07289200  |
| F | 4.76848700 | -3.51005100 | 0.61970400  |

2,3,5,6-FP/DMAP(i)\_Int1

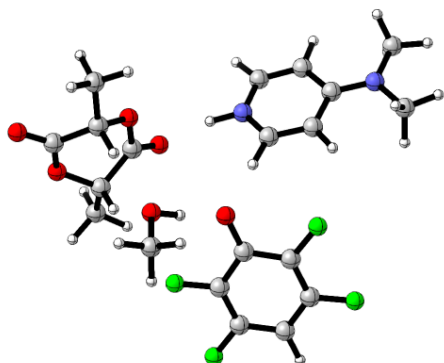

|   |             |             |             |
|---|-------------|-------------|-------------|
| O | -2.50423800 | 2.28952200  | 0.01344400  |
| C | -2.35522200 | 1.40859300  | -0.97580300 |
| O | -1.39320700 | 1.49006300  | -1.72203600 |
| H | -4.47277900 | 3.17410000  | 2.58742000  |
| C | -3.68268000 | 3.31100300  | 1.84420400  |
| H | -3.92517700 | 4.19349000  | 1.24348500  |
| H | -2.73185700 | 3.47280100  | 2.36110500  |
| C | -3.59048100 | 2.06920200  | 0.98160300  |
| H | -3.30676900 | 1.18465300  | 1.57326800  |
| C | -3.43261100 | 0.34231300  | -1.08595100 |
| H | -3.23433700 | -0.38264900 | -0.28092100 |
| O | -4.73470300 | 0.95257600  | -0.84819500 |
| C | -4.88231800 | 1.75030600  | 0.23355800  |
| O | -5.96820900 | 2.15880600  | 0.55631300  |
| C | -3.48049600 | -0.34702600 | -2.43475600 |
| H | -3.65742400 | 0.37295200  | -3.23996400 |
| H | -2.53303600 | -0.86132800 | -2.61367100 |
| H | -4.28595500 | -1.08679700 | -2.43091100 |
| C | 3.20347900  | 3.35329800  | -1.09337000 |
| C | 1.88774100  | 3.16513300  | -1.44280500 |
| C | 1.70251700  | 1.28590700  | -0.02833700 |
| C | 3.01688700  | 1.41717700  | 0.35930900  |
| C | 3.82780600  | 2.46247700  | -0.16566700 |
| H | 3.74319000  | 4.17714000  | -1.54237400 |
| H | 1.37644400  | 3.81037400  | -2.14979900 |
| H | 1.04850400  | 0.48176600  | 0.34464200  |
| H | 3.40081800  | 0.68364700  | 1.05606800  |
| C | 5.73856700  | 1.65924000  | 1.13151600  |

|   |             |             |             |
|---|-------------|-------------|-------------|
| H | 6.78405200  | 1.93277200  | 1.27786200  |
| H | 5.23585000  | 1.68574600  | 2.10653300  |
| H | 5.70100700  | 0.63289800  | 0.74604400  |
| C | 5.93790700  | 3.68535100  | -0.36534300 |
| H | 5.51927800  | 4.66941800  | -0.11625300 |
| H | 6.94230000  | 3.62979400  | 0.05571300  |
| H | 6.02133100  | 3.60339700  | -1.45740100 |
| N | 1.16168500  | 2.15320600  | -0.91873100 |
| H | 0.17679100  | 2.00992400  | -1.21426700 |
| C | 0.28426200  | -4.27147400 | -0.80136300 |
| C | -0.27063900 | -3.07577200 | -0.37085400 |
| C | 0.46509800  | -2.10843900 | 0.37369100  |
| C | 1.81708900  | -2.48416100 | 0.62212600  |
| C | 2.36000800  | -3.68109400 | 0.18008500  |
| C | 1.61123700  | -4.60765100 | -0.53982200 |
| O | -0.03594600 | -0.98551200 | 0.77457900  |
| C | -2.70794800 | -1.72936400 | 2.80200100  |
| H | -3.69474400 | -1.53974500 | 3.24026300  |
| H | -1.96686500 | -1.75190800 | 3.61562400  |
| H | -2.72867400 | -2.71839200 | 2.31986000  |
| O | -2.43386000 | -0.69516600 | 1.86905200  |
| H | -1.53239600 | -0.84997700 | 1.47419500  |
| N | 5.12781300  | 2.60403500  | 0.19251100  |
| F | -0.48812200 | -5.13582200 | -1.50506100 |
| F | 3.66108800  | -3.95268300 | 0.46140600  |
| F | -1.56857000 | -2.80099900 | -0.66968300 |
| F | 2.60854200  | -1.62085700 | 1.32635900  |
| H | 2.03761100  | -5.54393500 | -0.87956300 |

2,3,4,5,6-FP/DMAP(j)\_Int1

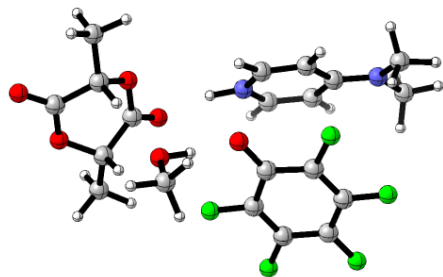

|   |             |            |             |
|---|-------------|------------|-------------|
| O | -3.37910300 | 1.51205700 | -0.23289900 |
| C | -3.02407800 | 0.59136100 | -1.12975100 |
| O | -2.11035900 | 0.81696300 | -1.90503700 |
| H | -5.52044700 | 2.18184400 | 2.26713900  |
| C | -4.78027700 | 2.41984400 | 1.49850200  |
| H | -5.22193800 | 3.14592400 | 0.80858500  |
| H | -3.90078400 | 2.86178700 | 1.97663000  |

|   |             |             |             |
|---|-------------|-------------|-------------|
| C | -4.38615000 | 1.14785000  | 0.77620100  |
| H | -3.90145400 | 0.42888600  | 1.45568000  |
| C | -3.81015900 | -0.70856600 | -1.09438400 |
| H | -3.43792900 | -1.26444900 | -0.21868200 |
| O | -5.22170400 | -0.41245500 | -0.88997700 |
| C | -5.56045100 | 0.44491000  | 0.09986500  |
| O | -6.71337300 | 0.61188600  | 0.40396200  |
| C | -3.68544200 | -1.53654100 | -2.35779400 |
| H | -4.03615900 | -0.97806900 | -3.23136100 |
| H | -2.63899200 | -1.81456000 | -2.50779000 |
| H | -4.28344600 | -2.44636200 | -2.25227300 |
| C | 1.92902900  | 2.43828400  | 0.45655900  |
| C | 0.63498300  | 2.18546400  | 0.07024400  |
| C | 1.32138400  | 1.74463800  | -2.13720900 |
| C | 2.63746900  | 1.97146600  | -1.81913300 |
| C | 2.99712600  | 2.30998700  | -0.47719600 |
| H | 2.11193500  | 2.66412100  | 1.49791300  |
| H | -0.19362200 | 2.19693900  | 0.76578400  |
| H | 1.00440800  | 1.45331300  | -3.13298000 |
| H | 3.38291000  | 1.85119200  | -2.59420900 |
| C | 5.36748000  | 2.28798300  | -1.07664300 |
| H | 6.31847000  | 2.52133700  | -0.59691600 |
| H | 5.40758900  | 1.24953100  | -1.43206300 |
| H | 5.25162900  | 2.95622900  | -1.93888400 |
| C | 4.62664900  | 2.72303700  | 1.29811900  |
| H | 4.27932800  | 1.90070400  | 1.93511100  |
| H | 5.71057700  | 2.79742400  | 1.39048000  |
| H | 4.18858400  | 3.66421400  | 1.65381400  |
| N | 0.34392900  | 1.85596200  | -1.20963200 |
| H | -0.62592900 | 1.59194100  | -1.45969200 |
| C | 1.83412500  | -2.63384300 | -0.73356300 |
| C | 0.76089800  | -1.91166800 | -0.22632600 |
| C | 0.86945200  | -0.98042300 | 0.85133100  |
| C | 2.19568100  | -0.87345800 | 1.36904700  |
| C | 3.27715700  | -1.58519000 | 0.86361300  |
| C | 3.11158600  | -2.47521700 | -0.19597600 |
| O | -0.11669300 | -0.28103000 | 1.29098800  |
| C | -2.50036900 | -2.04818400 | 2.97585500  |
| H | -3.52923600 | -2.32260500 | 3.23614300  |
| H | -2.02650900 | -1.59610700 | 3.86026100  |
| H | -1.95289400 | -2.96824100 | 2.72003900  |
| O | -2.54844100 | -1.14295400 | 1.88326600  |
| H | -1.61883800 | -0.86411800 | 1.65750000  |
| N | 4.28779100  | 2.48396700  | -0.10880100 |

|   |             |             |             |
|---|-------------|-------------|-------------|
| F | 1.65097400  | -3.48649000 | -1.76291300 |
| F | 4.50970900  | -1.40466900 | 1.39307800  |
| F | -0.45820200 | -2.09195300 | -0.79658500 |
| F | 2.42573000  | -0.02102900 | 2.40453300  |
| F | 4.16418000  | -3.16213700 | -0.69386800 |

Ph/DMAP(k)\_Int1

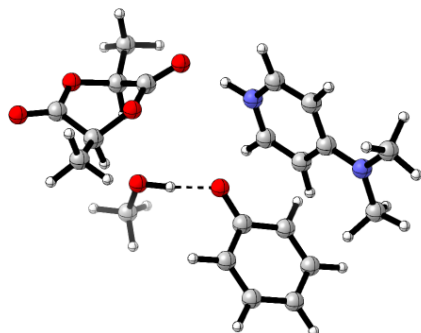

|   |             |             |             |
|---|-------------|-------------|-------------|
| O | 2.41415800  | -1.29518900 | 0.69698900  |
| C | 2.57732100  | -1.37694300 | -0.62248900 |
| O | 1.79295200  | -2.02619300 | -1.29628700 |
| H | 3.64503300  | 0.08721500  | 3.50123800  |
| C | 3.03305600  | -0.60596800 | 2.91776700  |
| H | 3.30877500  | -1.62764300 | 3.19819300  |
| H | 1.97858400  | -0.43494800 | 3.15451500  |
| C | 3.27193400  | -0.35856200 | 1.44306500  |
| H | 2.96557000  | 0.65733800  | 1.14414500  |
| C | 3.75944500  | -0.61292500 | -1.19281800 |
| H | 3.45684000  | 0.44859200  | -1.19439800 |
| O | 4.90557400  | -0.76629700 | -0.30719700 |
| C | 4.72394500  | -0.55640400 | 1.01751300  |
| O | 5.66199700  | -0.53046600 | 1.77178800  |
| C | 4.17919100  | -1.07174000 | -2.57544700 |
| H | 4.47294600  | -2.12621900 | -2.56952000 |
| H | 3.34716400  | -0.94204100 | -3.27292200 |
| H | 5.02574000  | -0.46788600 | -2.91488100 |
| C | -2.95454700 | -3.14579600 | 0.00544500  |
| C | -1.62252800 | -3.23709900 | -0.31925600 |
| C | -1.45578600 | -0.90001000 | -0.61076200 |
| C | -2.78650600 | -0.74123600 | -0.29272400 |
| C | -3.59293600 | -1.86624700 | 0.03710300  |
| H | -3.49208000 | -4.05628200 | 0.23762000  |
| H | -1.09591000 | -4.18546000 | -0.34894100 |
| H | -0.80597500 | -0.03942600 | -0.84277000 |
| H | -3.17730700 | 0.26871200  | -0.30021200 |
| C | -5.51591600 | -0.39830500 | 0.39250900  |

|   |             |             |             |
|---|-------------|-------------|-------------|
| H | -6.55330500 | -0.49609800 | 0.71461500  |
| H | -4.99708900 | 0.26744600  | 1.09225200  |
| H | -5.50279500 | 0.06665700  | -0.60113400 |
| C | -5.71108900 | -2.90150200 | 0.68928100  |
| H | -5.31656500 | -3.43505400 | 1.56450300  |
| H | -6.72651100 | -2.57794500 | 0.92062700  |
| H | -5.76140600 | -3.60094600 | -0.15615100 |
| N | -0.89744800 | -2.13605900 | -0.61813100 |
| H | 0.11185600  | -2.21406800 | -0.83822900 |
| C | -3.31655500 | 3.41281600  | -0.86288600 |
| C | -2.20077600 | 2.70864500  | -1.31992500 |
| C | -1.10138500 | 2.40675800  | -0.46101300 |
| C | -1.20330300 | 2.88093900  | 0.88081200  |
| C | -2.32292600 | 3.58580200  | 1.32502500  |
| C | -3.39821300 | 3.85580500  | 0.46562500  |
| O | -0.08308700 | 1.69619900  | -0.88377000 |
| C | 2.71588600  | 3.48141100  | -0.45170300 |
| H | 3.78484500  | 3.61273100  | -0.24185100 |
| H | 2.14803300  | 4.12899100  | 0.23413700  |
| H | 2.52117200  | 3.81956700  | -1.48131900 |
| O | 2.38832800  | 2.11264700  | -0.27769500 |
| H | 1.40227700  | 1.98563300  | -0.48391100 |
| N | -4.90048900 | -1.72944900 | 0.36720900  |
| H | -0.37794200 | 2.67421100  | 1.56068200  |
| H | -2.35811900 | 3.93203900  | 2.35783700  |
| H | -4.26292300 | 4.41558600  | 0.81448500  |
| H | -4.12889600 | 3.63226300  | -1.55619300 |
| H | -2.13570200 | 2.38334400  | -2.35732000 |

*o*-FP/DMAP(a)\_Int2

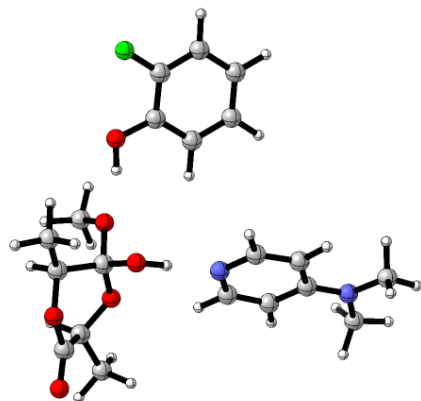

|   |            |             |             |
|---|------------|-------------|-------------|
| O | 1.90018000 | -1.78407800 | 0.74958200  |
| C | 2.20003400 | -0.60646300 | 0.00492900  |
| O | 1.37213800 | -0.47510500 | -1.05872800 |
| H | 2.96508300 | -4.88162000 | 1.42570500  |



|   |             |             |             |
|---|-------------|-------------|-------------|
| C | 2.22580500  | -4.08356900 | 1.31616400  |
| H | 1.46505100  | -4.41456700 | 0.60259500  |
| H | 1.75307700  | -3.89608000 | 2.28588200  |
| C | 2.89958500  | -2.81498000 | 0.82241800  |
| H | 3.68019700  | -2.51252600 | 1.54401200  |
| C | 3.66757000  | -0.61169700 | -0.47828000 |
| H | 4.32609900  | -0.55312400 | 0.39902500  |
| O | 3.94579000  | -1.86513600 | -1.15481800 |
| C | 3.60528700  | -3.00833800 | -0.52436100 |
| O | 3.87808300  | -4.08188900 | -0.99950800 |
| C | 3.99810600  | 0.50444200  | -1.45174700 |
| H | 3.36577500  | 0.42831600  | -2.33954900 |
| H | 3.83167000  | 1.47956100  | -0.98376900 |
| H | 5.04923600  | 0.43015900  | -1.74816800 |
| C | -2.93206200 | -2.30200300 | 0.59250700  |
| C | -1.61901000 | -1.90219900 | 0.38530100  |
| C | -2.21513000 | -0.47641400 | -1.29820500 |
| C | -3.55911700 | -0.80251000 | -1.17990700 |
| C | -3.96736100 | -1.74572800 | -0.20208400 |
| H | -3.13920700 | -3.03815400 | 1.36043900  |
| H | -0.81671700 | -2.32474300 | 0.98779900  |
| H | -1.90011900 | 0.24943800  | -2.04612300 |
| H | -4.27184600 | -0.32636000 | -1.84295400 |
| C | -6.30063500 | -1.55897800 | -0.92772400 |
| H | -7.27862200 | -1.93300000 | -0.61942300 |
| H | -6.33141200 | -0.46215500 | -0.88387300 |
| H | -6.13291000 | -1.85847200 | -1.97309800 |
| C | -5.64558600 | -3.12625600 | 0.93034700  |
| H | -5.32976900 | -2.85106200 | 1.94548800  |
| H | -6.73107000 | -3.24060500 | 0.93812700  |
| H | -5.19997200 | -4.10128700 | 0.68207600  |
| N | -1.23948800 | -1.00274700 | -0.53826700 |
| H | 0.41676500  | -0.67117300 | -0.80167300 |
| C | -1.07200600 | 5.61933900  | 0.07560300  |
| C | 0.17339600  | 5.01748100  | -0.02696100 |
| C | 0.35581900  | 3.63724200  | 0.15487100  |
| C | -0.77757600 | 2.86411900  | 0.44776000  |
| C | -2.03885300 | 3.45935300  | 0.55632000  |
| C | -2.19381000 | 4.83533700  | 0.37176100  |
| H | -1.14756500 | 6.69269300  | -0.07577600 |
| H | -2.90087000 | 2.83773500  | 0.78625400  |
| O | 1.60716100  | 3.13464200  | 0.04071200  |
| C | 2.48622700  | 0.48309700  | 2.20503200  |
| H | 2.12073800  | -0.39585800 | 2.74568100  |

|   |             |             |             |
|---|-------------|-------------|-------------|
| H | 2.12292900  | 1.39123200  | 2.69254100  |
| H | 3.58461000  | 0.49847400  | 2.21363500  |
| O | 1.95969300  | 0.51671800  | 0.87409300  |
| H | 1.61160300  | 2.17216400  | 0.21972800  |
| H | -0.65804400 | 1.79174900  | 0.58384400  |
| N | -5.28177800 | -2.09692100 | -0.03495500 |
| F | 1.25757800  | 5.78202300  | -0.31052300 |
| H | -3.17250900 | 5.29986400  | 0.45571400  |

*m*-FP/DMAP(b)\_Int2

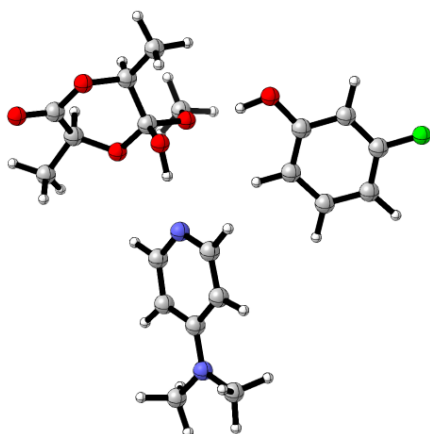

|   |             |             |             |
|---|-------------|-------------|-------------|
| O | -2.64510300 | 0.55076700  | 0.76839600  |
| C | -2.33955800 | -0.59178600 | -0.02736700 |
| O | -1.58113900 | -0.25575400 | -1.09745900 |
| H | -5.08522400 | 2.69325000  | 1.56973000  |
| C | -4.05096700 | 2.36914300  | 1.42589900  |
| H | -3.56908700 | 3.05746800  | 0.72480600  |
| H | -3.52579600 | 2.40615400  | 2.38597900  |
| C | -4.02117000 | 0.95133300  | 0.88183400  |
| H | -4.53697900 | 0.27829600  | 1.59079300  |
| C | -3.62850700 | -1.29592200 | -0.50672300 |
| H | -4.15290900 | -1.70253100 | 0.36874900  |
| O | -4.50403500 | -0.32211400 | -1.13137400 |
| C | -4.75788700 | 0.81801100  | -0.45568900 |
| O | -5.53424200 | 1.63273500  | -0.88699300 |
| C | -3.38469200 | -2.39529100 | -1.52383500 |
| H | -2.89069700 | -1.98602100 | -2.40831700 |
| H | -2.74804100 | -3.17480700 | -1.09408400 |
| H | -4.34079300 | -2.84111100 | -1.81606100 |
| C | 1.29522000  | 3.42704000  | 0.55742000  |
| C | 0.33582500  | 2.44588800  | 0.34805200  |
| C | 1.56251800  | 1.46132800  | -1.30975700 |
| C | 2.58541200  | 2.39153100  | -1.18796200 |
| C | 2.48057100  | 3.42524300  | -0.22217800 |

|   |             |             |             |
|---|-------------|-------------|-------------|
| H | 1.11543000  | 4.18048000  | 1.31541100  |
| H | -0.57761600 | 2.43873900  | 0.94035500  |
| H | 1.64282100  | 0.66496000  | -2.04776800 |
| H | 3.44776900  | 2.30663800  | -1.83865800 |
| C | 4.62686800  | 4.37128500  | -0.93232500 |
| H | 5.30534300  | 5.16757600  | -0.62083900 |
| H | 5.17566800  | 3.42189400  | -0.87681500 |
| H | 4.34841700  | 4.54870600  | -1.98198200 |
| C | 3.27720700  | 5.45550400  | 0.89490700  |
| H | 3.11472900  | 5.07723700  | 1.91294000  |
| H | 4.17605700  | 6.07462400  | 0.90876700  |
| H | 2.42406800  | 6.09551300  | 0.62368700  |
| N | 0.44411100  | 1.46538100  | -0.56444400 |
| H | -0.83910100 | 0.37577500  | -0.83380900 |
| C | 3.66556400  | -4.20407000 | 0.06918300  |
| C | 2.31057300  | -4.36825600 | -0.17791700 |
| C | 1.45102100  | -3.28599400 | 0.06668300  |
| C | 1.97149400  | -2.07180000 | 0.54661900  |
| C | 3.34330900  | -1.95340600 | 0.78335600  |
| C | 4.21724600  | -3.01968300 | 0.54890600  |
| H | 3.73817300  | -1.01126200 | 1.15642100  |
| O | 0.13021400  | -3.47457200 | -0.17722200 |
| C | -2.00040100 | -1.76801700 | 2.11952500  |
| H | -2.12378200 | -0.84609500 | 2.69691800  |
| H | -1.21627400 | -2.38078300 | 2.57139800  |
| H | -2.93757200 | -2.34131200 | 2.12412500  |
| O | -1.55460500 | -1.48021000 | 0.79013600  |
| H | -0.38634400 | -2.67643600 | 0.05442300  |
| H | 1.30381000  | -1.23265400 | 0.72290800  |
| N | 3.46518300  | 4.36375600  | -0.05189700 |
| H | 5.28510500  | -2.94595500 | 0.72752100  |
| F | 4.49340500  | -5.25796600 | -0.16970700 |
| H | 1.92052800  | -5.30988900 | -0.55052200 |

*p*-FP/DMAP(c)\_Int2

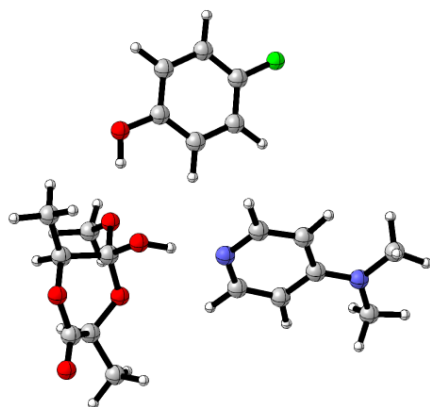

|   |             |             |             |
|---|-------------|-------------|-------------|
| O | -2.62343500 | 0.73702700  | 0.77810600  |
| C | -2.45501900 | -0.43070300 | -0.02193100 |
| O | -1.68903600 | -0.17407700 | -1.10885300 |
| H | -4.80461200 | 3.13170700  | 1.61118800  |
| C | -3.81393400 | 2.69755400  | 1.45153800  |
| H | -3.27260700 | 3.32731600  | 0.73890900  |
| H | -3.27125700 | 2.68112600  | 2.40242000  |
| C | -3.94632300 | 1.28284100  | 0.91456400  |
| H | -4.51745900 | 0.67106500  | 1.63658000  |
| C | -3.81989300 | -0.99681200 | -0.47269600 |
| H | -4.36569300 | -1.34518700 | 0.41473000  |
| O | -4.60151000 | 0.06222600  | -1.08302800 |
| C | -4.71954700 | 1.22458300  | -0.40762300 |
| O | -5.41464700 | 2.11536800  | -0.82693400 |
| C | -3.71315900 | -2.11689100 | -1.49087000 |
| H | -3.19808800 | -1.76208000 | -2.38679300 |
| H | -3.15208800 | -2.95783000 | -1.07171800 |
| H | -4.71634900 | -2.46116700 | -1.76177900 |
| C | 1.63335900  | 3.10525500  | 0.58069000  |
| C | 0.55780500  | 2.25636300  | 0.35870600  |
| C | 1.59597300  | 1.24234000  | -1.40691100 |
| C | 2.72532900  | 2.03855900  | -1.27818000 |
| C | 2.77772700  | 3.01877500  | -0.25380900 |
| H | 1.57567500  | 3.82149100  | 1.39204700  |
| H | -0.32579700 | 2.31564500  | 0.99196100  |
| H | 1.55507800  | 0.48732300  | -2.19027800 |
| H | 3.54934800  | 1.89115400  | -1.96634400 |
| C | 5.02595100  | 3.69715600  | -0.95503900 |
| H | 5.77938100  | 4.43112700  | -0.66380900 |
| H | 5.47808900  | 2.69784100  | -0.88079300 |
| H | 4.76328100  | 3.88009100  | -2.00642900 |
| C | 3.88235500  | 4.81580900  | 0.99292300  |
| H | 3.79707100  | 4.34132300  | 1.98117500  |
| H | 4.82592500  | 5.36342800  | 0.96199500  |

|   |             |             |             |
|---|-------------|-------------|-------------|
| H | 3.06499600  | 5.54312800  | 0.88759400  |
| N | 0.51471100  | 1.32886300  | -0.61298900 |
| H | -0.88336800 | 0.38164800  | -0.86275700 |
| C | 3.21735900  | -4.59919300 | -0.06655400 |
| C | 1.83023700  | -4.63548300 | -0.21917500 |
| C | 1.06106900  | -3.48285600 | 0.00178100  |
| C | 1.69590300  | -2.28867700 | 0.37670800  |
| C | 3.08565200  | -2.24939600 | 0.53249100  |
| C | 3.82247100  | -3.40451000 | 0.30854300  |
| H | 3.82525600  | -5.48365900 | -0.23456000 |
| H | 3.59035100  | -1.33221300 | 0.82246200  |
| O | -0.28699500 | -3.58133500 | -0.15957200 |
| C | -2.19431200 | -1.63307700 | 2.12044100  |
| H | -2.20493600 | -0.70308200 | 2.69796700  |
| H | -1.47104800 | -2.32701600 | 2.55613800  |
| H | -3.18748600 | -2.10200700 | 2.14753300  |
| O | -1.74975500 | -1.39567200 | 0.78066700  |
| H | -0.72514700 | -2.73227700 | 0.04689100  |
| H | 1.10491500  | -1.39079800 | 0.53847500  |
| H | 1.32779400  | -5.55354000 | -0.51084300 |
| F | 5.17974800  | -3.36618600 | 0.45917400  |
| N | 3.86672300  | 3.83156600  | -0.08146900 |

2,3-FP/DMAP(d)\_Int2

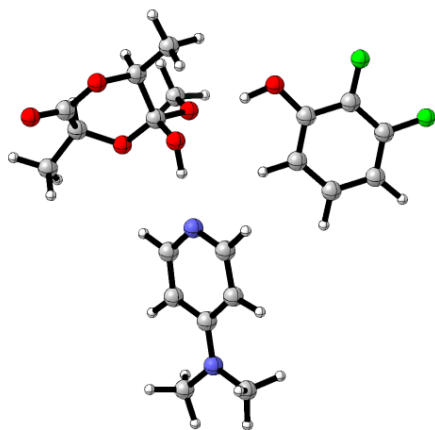

|   |             |             |             |
|---|-------------|-------------|-------------|
| O | -2.59561300 | -1.03592700 | 0.75409700  |
| C | -1.61764800 | -1.76553300 | 0.01981800  |
| O | -1.15187300 | -1.04552800 | -1.02838100 |
| H | -5.87665300 | -0.79888900 | 1.35967300  |
| C | -4.84970400 | -0.43314000 | 1.27606500  |
| H | -4.83844900 | 0.40292000  | 0.57013400  |
| H | -4.51263200 | -0.08163400 | 2.25677000  |
| C | -3.93904500 | -1.54813100 | 0.79199900  |
| H | -3.98443700 | -2.39133200 | 1.50493100  |

|   |             |             |             |
|---|-------------|-------------|-------------|
| C | -2.18808300 | -3.10923500 | -0.48626700 |
| H | -2.41156500 | -3.74504100 | 0.38123300  |
| O | -3.43509300 | -2.86596900 | -1.18706700 |
| C | -4.36515800 | -2.10787300 | -0.56976700 |
| O | -5.44860800 | -1.93098500 | -1.06687800 |
| C | -1.27160500 | -3.84370600 | -1.44716700 |
| H | -1.07265500 | -3.22399100 | -2.32478900 |
| H | -0.32053600 | -4.08072800 | -0.96047900 |
| H | -1.74795900 | -4.77710200 | -1.76342100 |
| C | -1.25515400 | 3.63341300  | 0.62018700  |
| C | -1.36727300 | 2.26400200  | 0.42318200  |
| C | 0.15717100  | 2.28483700  | -1.27930300 |
| C | 0.34845500  | 3.65534300  | -1.17188900 |
| C | -0.36767600 | 4.38762000  | -0.19012100 |
| H | -1.85509100 | 4.10109000  | 1.39208500  |
| H | -2.04786300 | 1.67683100  | 1.03734100  |
| H | 0.70678500  | 1.72096000  | -2.03129300 |
| H | 1.04382400  | 4.13964000  | -1.84735700 |
| C | 0.65387700  | 6.48465900  | -0.94098200 |
| H | 0.66829400  | 7.53355800  | -0.63944400 |
| H | 1.68581100  | 6.11086900  | -0.90563100 |
| H | 0.30251300  | 6.43197600  | -1.98227200 |
| C | -1.02407200 | 6.46241900  | 0.93604500  |
| H | -0.87033900 | 6.07602000  | 1.95243700  |
| H | -0.73416800 | 7.51468800  | 0.93162000  |
| H | -2.09739600 | 6.40163300  | 0.70152400  |
| N | -0.68074700 | 1.57485700  | -0.50428300 |
| H | -0.98576500 | -0.08556400 | -0.76632600 |
| C | 5.32236200  | -1.06399900 | 0.07361600  |
| C | 4.31747100  | -2.02257400 | -0.00943400 |
| C | 2.97450600  | -1.66237300 | 0.18559800  |
| C | 2.67841300  | -0.31797600 | 0.46226200  |
| C | 3.70145300  | 0.62988400  | 0.54392900  |
| C | 5.03752800  | 0.26917000  | 0.35047900  |
| H | 3.45146900  | 1.66510800  | 0.76066600  |
| O | 2.04724100  | -2.63983100 | 0.09665400  |
| C | -0.76539900 | -2.48357700 | 2.22782800  |
| H | -1.44775200 | -1.81544600 | 2.76289900  |
| H | 0.20213300  | -2.50331200 | 2.73563400  |
| H | -1.17292600 | -3.50349000 | 2.21401600  |
| O | -0.50488300 | -1.99252600 | 0.90802300  |
| H | 1.15005200  | -2.28760200 | 0.27594300  |
| H | 1.64084300  | -0.02821200 | 0.60529600  |
| N | -0.21103300 | 5.74004900  | -0.03413600 |

|   |            |             |             |
|---|------------|-------------|-------------|
| H | 5.84920300 | 0.98733900  | 0.40901700  |
| F | 6.60163500 | -1.45585000 | -0.12054200 |
| F | 4.63679100 | -3.30391400 | -0.27604800 |

2,4-FP/DMAP(e)\_Int2

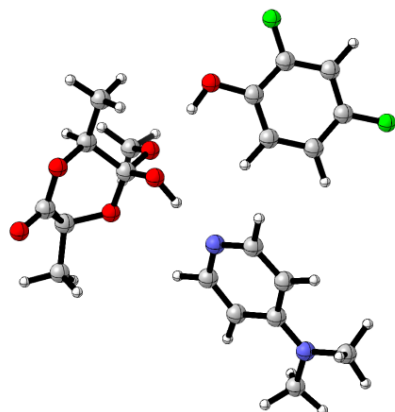

|   |             |             |             |
|---|-------------|-------------|-------------|
| O | -2.73002100 | 0.72894100  | 0.76913600  |
| C | -2.43549700 | -0.45199700 | 0.03030600  |
| O | -1.63323600 | -0.18335100 | -1.02819400 |
| H | -5.10453200 | 3.01542100  | 1.33654700  |
| C | -4.08060100 | 2.63970800  | 1.26057900  |
| H | -3.53519200 | 3.26619200  | 0.54823800  |
| H | -3.59930100 | 2.70742400  | 2.24175400  |
| C | -4.09079900 | 1.19385200  | 0.79534200  |
| H | -4.66599800 | 0.58319900  | 1.51491000  |
| C | -3.72895800 | -1.13781000 | -0.46241500 |
| H | -4.29975000 | -1.48126800 | 0.41112500  |
| O | -4.54428300 | -0.16722400 | -1.16806000 |
| C | -4.77631300 | 1.01706300  | -0.56428700 |
| O | -5.50109000 | 1.83681800  | -1.06921700 |
| C | -3.48722300 | -2.29464200 | -1.41428400 |
| H | -2.94488900 | -1.94771600 | -2.29714200 |
| H | -2.89805000 | -3.07511200 | -0.92297100 |
| H | -4.44753300 | -2.71956800 | -1.72319100 |
| C | 1.32739900  | 3.42441500  | 0.68851900  |
| C | 0.35558100  | 2.45654900  | 0.47577000  |
| C | 1.43799800  | 1.63323400  | -1.36109000 |
| C | 2.46597300  | 2.55832000  | -1.24512300 |
| C | 2.44145800  | 3.50326800  | -0.18685500 |
| H | 1.21292200  | 4.10543000  | 1.52375600  |
| H | -0.50477300 | 2.39038700  | 1.13959500  |
| H | 1.45595300  | 0.90617000  | -2.17144800 |
| H | 3.27023500  | 2.53887600  | -1.97117200 |
| C | 4.53979500  | 4.50022700  | -0.96693300 |

|   |             |             |             |
|---|-------------|-------------|-------------|
| H | 5.22645800  | 5.29015800  | -0.65769700 |
| H | 5.10171000  | 3.55661800  | -0.99592500 |
| H | 4.19397000  | 4.72826800  | -1.98562600 |
| C | 3.34785100  | 5.40806300  | 1.05953100  |
| H | 3.31324500  | 4.91749300  | 2.04209500  |
| H | 4.23247100  | 6.04678800  | 1.03459900  |
| H | 2.46046300  | 6.05049700  | 0.96244300  |
| N | 0.38779300  | 1.55965900  | -0.52494200 |
| H | -0.90262100 | 0.46437800  | -0.77572600 |
| C | 3.47348400  | -4.19984900 | -0.01239700 |
| C | 2.09033200  | -4.32413100 | -0.01360800 |
| C | 1.23307800  | -3.22371000 | 0.14787500  |
| C | 1.82192900  | -1.96274000 | 0.31449400  |
| C | 3.21304100  | -1.80679800 | 0.32194900  |
| C | 4.01273800  | -2.92847500 | 0.15815500  |
| H | 3.66593000  | -0.82873600 | 0.45150100  |
| O | -0.10307100 | -3.44388200 | 0.13531800  |
| C | -2.20505700 | -1.55302200 | 2.23144400  |
| H | -2.32972400 | -0.60691800 | 2.76777200  |
| H | -1.45301000 | -2.16495500 | 2.73570000  |
| H | -3.15412900 | -2.10585000 | 2.22007000  |
| O | -1.70187100 | -1.32557200 | 0.90989600  |
| H | -0.59298400 | -2.60944300 | 0.28619000  |
| H | 1.17896300  | -1.09454300 | 0.43295700  |
| N | 3.43255300  | 4.43375500  | -0.02097600 |
| F | 5.36822700  | -2.79064800 | 0.16222700  |
| H | 4.10572600  | -5.07235400 | -0.14021900 |
| F | 1.54769800  | -5.55265500 | -0.17551200 |

2,6-FP/DMAP(f)\_Int2

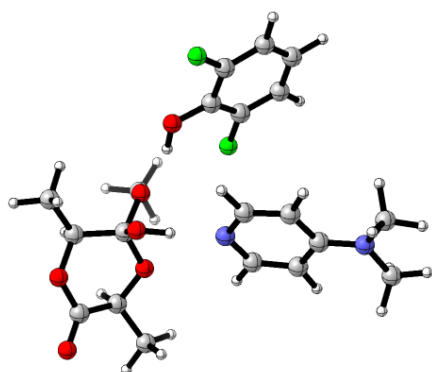

|   |            |             |             |
|---|------------|-------------|-------------|
| O | 2.78030500 | -0.71046800 | 0.77423100  |
| C | 2.58819600 | 0.42208400  | -0.07394600 |
| O | 1.87444300 | 0.09644000  | -1.17628500 |
| H | 4.98680900 | -3.07984500 | 1.61162000  |



|   |             |             |             |
|---|-------------|-------------|-------------|
| C | 3.99177300  | -2.65849800 | 1.44458400  |
| H | 3.46254000  | -3.29571600 | 0.72944200  |
| H | 3.44167600  | -2.64718800 | 2.39123800  |
| C | 4.10775500  | -1.24232400 | 0.90660600  |
| H | 4.67248200  | -0.62410800 | 1.62901900  |
| C | 3.94392400  | 1.02495100  | -0.50212500 |
| H | 4.46336400  | 1.39503700  | 0.39230000  |
| O | 4.76638200  | -0.01593800 | -1.08915900 |
| C | 4.89062900  | -1.17530300 | -0.41001100 |
| O | 5.60600300  | -2.05569000 | -0.81800500 |
| C | 3.81939900  | 2.13315100  | -1.53085200 |
| H | 3.33395500  | 1.75390100  | -2.43328600 |
| H | 3.21649800  | 2.95224800  | -1.12667400 |
| H | 4.81400400  | 2.51354700  | -1.78490600 |
| C | -1.70527400 | -2.93533300 | 0.46894500  |
| C | -0.54641800 | -2.20068700 | 0.25766400  |
| C | -1.47851900 | -1.04496400 | -1.47994600 |
| C | -2.68611100 | -1.71852900 | -1.35885800 |
| C | -2.83907500 | -2.70490100 | -0.35151200 |
| H | -1.71896100 | -3.67339100 | 1.26245800  |
| H | 0.32741000  | -2.36633700 | 0.88568700  |
| H | -1.35788000 | -0.28279900 | -2.24808700 |
| H | -3.49165400 | -1.47190200 | -2.04041800 |
| C | -5.12575200 | -3.17742600 | -1.09622500 |
| H | -5.97307200 | -3.78798000 | -0.77852600 |
| H | -5.44801500 | -2.12771300 | -1.09297000 |
| H | -4.86997400 | -3.45687600 | -2.12946200 |
| C | -4.09877800 | -4.45399600 | 0.81435200  |
| H | -3.88519100 | -4.07498800 | 1.82279700  |
| H | -5.11237900 | -4.85923800 | 0.81792600  |
| H | -3.40108000 | -5.27786100 | 0.60055200  |
| N | -0.40982100 | -1.26449800 | -0.69555400 |
| H | 1.04233600  | -0.42217100 | -0.93337500 |
| C | -3.94732600 | 3.36282300  | -0.20051600 |
| C | -2.66269800 | 3.22497000  | -0.70846300 |
| C | -1.61244200 | 2.63722100  | 0.01727700  |
| C | -1.94597900 | 2.19198500  | 1.30414200  |
| C | -3.21718000 | 2.30797100  | 1.85059300  |
| C | -4.22804500 | 2.90007400  | 1.08939200  |
| H | -3.39403800 | 1.93859800  | 2.85633400  |
| O | -0.39443900 | 2.55022300  | -0.54386500 |
| C | 2.24971100  | 1.70875100  | 2.00039800  |
| H | 2.38020700  | 0.80505100  | 2.60452300  |
| H | 1.45287700  | 2.31806700  | 2.43101700  |

|   |             |             |             |
|---|-------------|-------------|-------------|
| H | 3.17997200  | 2.29325000  | 1.99193400  |
| O | 1.82112100  | 1.37896500  | 0.67503800  |
| H | 0.25564700  | 2.05468600  | 0.00031200  |
| N | -4.01346000 | -3.39255700 | -0.17976400 |
| H | -4.70726500 | 3.83059200  | -0.81937200 |
| F | -2.39237100 | 3.66989900  | -1.95729000 |
| F | -0.95167500 | 1.62209500  | 2.04206700  |
| H | -5.22814400 | 3.00421400  | 1.49949900  |

2,3,6-FP/DMAP(g)\_Int2

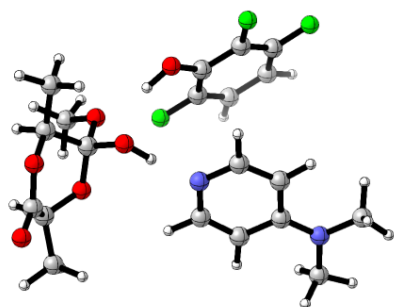

|   |             |             |             |
|---|-------------|-------------|-------------|
| O | -2.99556100 | 0.53195000  | 0.77639200  |
| C | -2.77470600 | -0.55667400 | -0.11814400 |
| O | -2.04356400 | -0.17534400 | -1.19078600 |
| H | -5.22954900 | 2.86840500  | 1.63497400  |
| C | -4.22935700 | 2.45494900  | 1.47953000  |
| H | -3.68307000 | 3.11784100  | 0.80154300  |
| H | -3.70444400 | 2.41104300  | 2.43942000  |
| C | -4.32766200 | 1.05844900  | 0.88927000  |
| H | -4.91018300 | 0.41434500  | 1.57377600  |
| C | -4.11453900 | -1.15448400 | -0.60017900 |
| H | -4.65216000 | -1.56213600 | 0.26668000  |
| O | -4.93032300 | -0.09743700 | -1.16641700 |
| C | -5.07554400 | 1.03649400  | -0.44913200 |
| O | -5.78413000 | 1.92862100  | -0.84269200 |
| C | -3.95694700 | -2.22131100 | -1.66741100 |
| H | -3.45000000 | -1.80517100 | -2.54135700 |
| H | -3.36128900 | -3.05330600 | -1.27906700 |
| H | -4.94250400 | -2.59546300 | -1.96252600 |
| C | 1.44723000  | 2.92475100  | 0.55166500  |
| C | 0.31494400  | 2.14808400  | 0.34690100  |
| C | 1.21294100  | 1.15286200  | -1.50453900 |
| C | 2.39177600  | 1.87715000  | -1.39652100 |
| C | 2.54861300  | 2.80391000  | -0.33432000 |
| H | 1.46569800  | 3.61125400  | 1.39008000  |
| H | -0.53358800 | 2.23108700  | 1.02407800  |
| H | 1.09008200  | 0.43632000  | -2.31508200 |

|   |             |             |             |
|---|-------------|-------------|-------------|
| H | 3.17248200  | 1.71568200  | -2.13047100 |
| C | 4.77254300  | 3.43234800  | -1.15045900 |
| H | 5.60500000  | 4.06299600  | -0.83289700 |
| H | 5.14233300  | 2.40141000  | -1.22791500 |
| H | 4.45517400  | 3.76176200  | -2.15123400 |
| C | 3.78227800  | 4.53463200  | 0.88482900  |
| H | 3.64203200  | 4.08037000  | 1.87497400  |
| H | 4.77326300  | 4.99183200  | 0.86451500  |
| H | 3.03440800  | 5.33255700  | 0.76225700  |
| N | 0.17543000  | 1.26748500  | -0.65770400 |
| H | -1.24087200 | 0.37319100  | -0.91564400 |
| C | 3.98598700  | -2.52850100 | 0.00034900  |
| C | 2.72469200  | -2.63516900 | -0.58015800 |
| C | 1.56407000  | -2.29544200 | 0.13525800  |
| C | 1.75892200  | -1.85187800 | 1.45275400  |
| C | 3.00930100  | -1.74108400 | 2.04116400  |
| C | 4.14823900  | -2.08512800 | 1.30695800  |
| H | 3.08174100  | -1.39218200 | 3.06657400  |
| O | 0.37592500  | -2.42932000 | -0.47124900 |
| C | -2.47115400 | -1.94183100 | 1.89881500  |
| H | -2.62145100 | -1.07254500 | 2.54706000  |
| H | -1.68301900 | -2.57111400 | 2.31653000  |
| H | -3.39723500 | -2.52884500 | 1.83420800  |
| O | -2.01106800 | -1.53944100 | 0.60371000  |
| H | -0.37236600 | -2.03173100 | 0.02916900  |
| N | 3.69589800  | 3.53716100  | -0.17349100 |
| F | 2.60907000  | -3.06243700 | -1.84935800 |
| F | 0.64960400  | -1.52290100 | 2.17138800  |
| H | 5.14428400  | -2.01707900 | 1.73154200  |
| F | 5.06532000  | -2.86333400 | -0.74139200 |

3,4,5-FP/DMAP(h)\_Int2

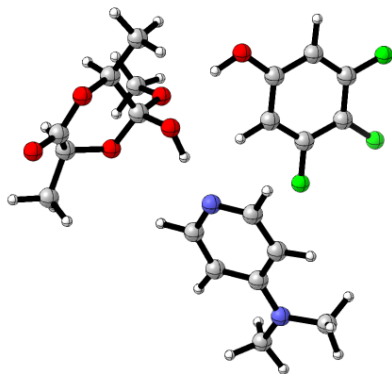

|   |             |             |            |
|---|-------------|-------------|------------|
| O | -3.04139500 | 0.41319200  | 0.81257700 |
| C | -2.70877500 | -0.71143200 | 0.00598200 |

|   |             |             |             |
|---|-------------|-------------|-------------|
| O | -2.05915900 | -0.34144500 | -1.12241900 |
| H | -5.52951200 | 2.52908100  | 1.53815600  |
| C | -4.48939800 | 2.22861500  | 1.38579300  |
| H | -4.04672600 | 2.88556000  | 0.63093400  |
| H | -3.94116000 | 2.34164900  | 2.32681900  |
| C | -4.42745700 | 0.78085600  | 0.93005300  |
| H | -4.90283900 | 0.13719400  | 1.69278100  |
| C | -3.97191400 | -1.51847000 | -0.36487300 |
| H | -4.42489900 | -1.90809500 | 0.55720300  |
| O | -4.93332700 | -0.63037200 | -0.98823400 |
| C | -5.20333100 | 0.53905100  | -0.37008700 |
| O | -6.03185700 | 1.29353300  | -0.81268900 |
| C | -3.71280700 | -2.65180200 | -1.34010100 |
| H | -3.28240800 | -2.26011800 | -2.26499400 |
| H | -3.01570200 | -3.37467400 | -0.90483700 |
| H | -4.65438300 | -3.16199700 | -1.56663200 |
| C | 0.92051200  | 3.25222500  | 0.55924700  |
| C | -0.09371400 | 2.33449800  | 0.32671400  |
| C | 0.84559000  | 1.64879900  | -1.64109800 |
| C | 1.90713500  | 2.53191600  | -1.51183000 |
| C | 1.97870400  | 3.38051900  | -0.37710700 |
| H | 0.88749000  | 3.84844800  | 1.46347600  |
| H | -0.90779300 | 2.22630300  | 1.04153500  |
| H | 0.79339300  | 0.99084200  | -2.50716400 |
| H | 2.67125700  | 2.54477500  | -2.27987200 |
| C | 4.13750300  | 4.26967000  | -1.11786300 |
| H | 4.82747300  | 5.06606300  | -0.83274300 |
| H | 4.68527800  | 3.31546800  | -1.10084100 |
| H | 3.81036300  | 4.46448900  | -2.14705700 |
| C | 3.10289000  | 5.02888300  | 1.04274100  |
| H | 3.24498200  | 4.37706900  | 1.91823000  |
| H | 3.95577100  | 5.70719900  | 0.97906000  |
| H | 2.20421300  | 5.63741100  | 1.20536400  |
| N | -0.15255000 | 1.52926300  | -0.74812000 |
| H | -1.36961700 | 0.37501100  | -0.92914800 |
| C | 3.70750600  | -3.42366000 | -0.13562600 |
| C | 2.38348600  | -3.78669500 | -0.33096100 |
| C | 1.37097600  | -2.85374500 | -0.05592000 |
| C | 1.70352400  | -1.57101900 | 0.41012900  |
| C | 3.04288000  | -1.25032400 | 0.59417400  |
| C | 4.06478500  | -2.15757400 | 0.32844300  |
| O | 0.09261100  | -3.24668300 | -0.25795400 |
| C | -2.14952100 | -1.85737500 | 2.12529500  |
| H | -2.39200000 | -0.95919300 | 2.70201800  |

|   |             |             |             |
|---|-------------|-------------|-------------|
| H | -1.26791400 | -2.34037000 | 2.55453800  |
| H | -2.98834400 | -2.56544200 | 2.16088300  |
| O | -1.79592300 | -1.51658700 | 0.77949200  |
| H | -0.54120100 | -2.54196900 | -0.00654600 |
| N | 3.00575800  | 4.26962700  | -0.19793200 |
| F | 4.69033900  | -4.30976500 | -0.39612800 |
| H | 0.94029800  | -0.82603400 | 0.61114600  |
| H | 2.13677200  | -4.77936300 | -0.69225300 |
| F | 5.35693900  | -1.82298200 | 0.51230700  |
| F | 3.37891300  | -0.01972800 | 1.04021000  |

2,3,5,6-FP/DMAP(i)\_Int2

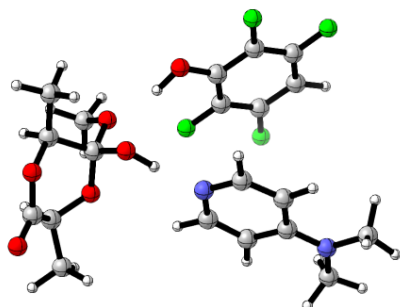

|   |             |             |             |
|---|-------------|-------------|-------------|
| O | -3.01734900 | 0.55962100  | 0.75395200  |
| C | -2.86341200 | -0.56581900 | -0.10433900 |
| O | -2.16487800 | -0.24811800 | -1.21875100 |
| H | -5.15969500 | 2.97340600  | 1.63270100  |
| C | -4.17663300 | 2.53181200  | 1.44827100  |
| H | -3.64652400 | 3.15766100  | 0.72394100  |
| H | -3.61063900 | 2.50916600  | 2.38524100  |
| C | -4.33242400 | 1.11866100  | 0.91300000  |
| H | -4.89307000 | 0.51054000  | 1.64659200  |
| C | -4.23536500 | -1.14887900 | -0.50620100 |
| H | -4.74146500 | -1.51545900 | 0.39729700  |
| O | -5.05276800 | -0.09302500 | -1.07169000 |
| C | -5.14302600 | 1.06714800  | -0.38750400 |
| O | -5.85186100 | 1.95990300  | -0.77846800 |
| C | -4.14878900 | -2.25407800 | -1.54209300 |
| H | -3.67467700 | -1.87868000 | -2.45216800 |
| H | -3.55350200 | -3.08573000 | -1.15257700 |
| H | -5.15445900 | -2.61572800 | -1.77904600 |
| C | 1.40787800  | 2.77643900  | 0.45934700  |
| C | 0.27256600  | 2.00103600  | 0.27037400  |
| C | 0.98436400  | 1.28502900  | -1.78068800 |
| C | 2.15640500  | 2.02361900  | -1.69923100 |
| C | 2.40767700  | 2.81181200  | -0.54656100 |
| H | 1.50967000  | 3.33759500  | 1.38078600  |

|   |             |             |             |
|---|-------------|-------------|-------------|
| H | -0.49833100 | 1.96546000  | 1.03800000  |
| H | 0.78936800  | 0.67646000  | -2.66243900 |
| H | 2.86056400  | 1.97848600  | -2.52171800 |
| C | 4.56711800  | 3.53220700  | -1.45359300 |
| H | 5.38012900  | 4.20507700  | -1.17506300 |
| H | 4.98781100  | 2.52476900  | -1.58755900 |
| H | 4.16615000  | 3.86965700  | -2.41910500 |
| C | 3.78756800  | 4.31377200  | 0.81144800  |
| H | 3.85148700  | 3.65579200  | 1.69039700  |
| H | 4.73325100  | 4.85105400  | 0.72005400  |
| H | 2.99544600  | 5.05368900  | 0.99088500  |
| N | 0.04063000  | 1.25627200  | -0.82398900 |
| H | -1.36277600 | 0.32863000  | -1.00215700 |
| C | 3.82402000  | -2.51045900 | -0.23920600 |
| C | 2.53130500  | -2.77506400 | -0.67736200 |
| C | 1.41530300  | -2.30183300 | 0.03641500  |
| C | 1.67249600  | -1.56385500 | 1.20286000  |
| C | 2.97264000  | -1.30533900 | 1.62368000  |
| C | 4.07159900  | -1.77290600 | 0.91457000  |
| O | 0.19379200  | -2.59537100 | -0.42292500 |
| C | -2.48460200 | -1.85854100 | 1.96703100  |
| H | -2.52060500 | -0.95552800 | 2.58430100  |
| H | -1.71609900 | -2.53147800 | 2.35365500  |
| H | -3.45296400 | -2.37554400 | 1.99800300  |
| O | -2.09678100 | -1.54553600 | 0.62437900  |
| H | -0.53414100 | -2.10206100 | 0.02479300  |
| N | 3.54664500  | 3.56153500  | -0.41345300 |
| F | 4.86130800  | -2.98079100 | -0.96131300 |
| F | 3.15791500  | -0.58558400 | 2.75081800  |
| F | 0.62709100  | -1.10360900 | 1.92656600  |
| F | 2.33691100  | -3.48729600 | -1.79990700 |
| H | 5.08374100  | -1.57475500 | 1.24850800  |

2,3,4,5,6-FP/DMAP(j)\_Int2

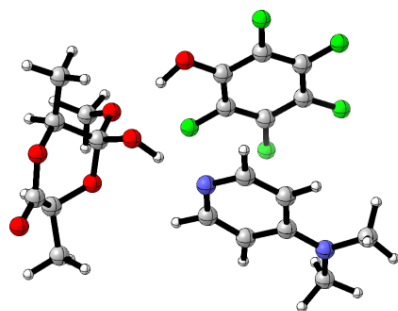

|   |             |             |             |
|---|-------------|-------------|-------------|
| O | -3.17080200 | 0.62665400  | 0.73439800  |
| C | -3.02328100 | -0.54989300 | -0.05109800 |

|   |             |             |             |
|---|-------------|-------------|-------------|
| O | -2.29897400 | -0.31211100 | -1.16910800 |
| H | -5.29363000 | 3.10853200  | 1.45715200  |
| C | -4.31400200 | 2.64627600  | 1.30869300  |
| H | -3.76832200 | 3.22558200  | 0.55772700  |
| H | -3.75899200 | 2.66834400  | 2.25220800  |
| C | -4.48135600 | 1.20808500  | 0.84926500  |
| H | -5.05628000 | 0.64682700  | 1.60850200  |
| C | -4.39761700 | -1.13536600 | -0.44104300 |
| H | -4.92163000 | -1.44477100 | 0.47360400  |
| O | -5.19134300 | -0.10142000 | -1.07596100 |
| C | -5.27719000 | 1.09506200  | -0.45640100 |
| O | -5.97022200 | 1.97310000  | -0.90433400 |
| C | -4.31254600 | -2.29730800 | -1.41307100 |
| H | -3.82021900 | -1.97964000 | -2.33536800 |
| H | -3.73573200 | -3.11482600 | -0.96959000 |
| H | -5.32007000 | -2.65710800 | -1.64472700 |
| C | 1.29848900  | 2.74945000  | 0.39582500  |
| C | 0.14343100  | 1.99972100  | 0.22476000  |
| C | 0.84772800  | 1.19632000  | -1.79605100 |
| C | 2.03940500  | 1.90445900  | -1.73080600 |
| C | 2.30567900  | 2.72469900  | -0.60356400 |
| H | 1.41085600  | 3.33605200  | 1.29993600  |
| H | -0.63214800 | 2.01040700  | 0.98846900  |
| H | 0.64183200  | 0.56450600  | -2.65887600 |
| H | 2.74747200  | 1.81124000  | -2.54585800 |
| C | 4.50822800  | 3.32047300  | -1.49642300 |
| H | 5.32558400  | 4.00060600  | -1.25012300 |
| H | 4.91445400  | 2.29907700  | -1.54486800 |
| H | 4.13448200  | 3.59253600  | -2.49208900 |
| C | 3.73774800  | 4.19424100  | 0.73453000  |
| H | 3.80910800  | 3.53565300  | 1.61283400  |
| H | 4.68775600  | 4.72024000  | 0.62445600  |
| H | 2.95923700  | 4.94446200  | 0.92573300  |
| N | -0.10218100 | 1.22381300  | -0.84509800 |
| H | -1.50616600 | 0.28627800  | -0.97894300 |
| C | 3.55177800  | -2.29978100 | -0.42902000 |
| C | 2.24779500  | -2.71022300 | -0.69293200 |
| C | 1.16778800  | -2.29306200 | 0.10362100  |
| C | 1.46970300  | -1.45589700 | 1.18797600  |
| C | 2.76908900  | -1.03377000 | 1.45680500  |
| C | 3.81966500  | -1.45438900 | 0.64654300  |
| O | -0.06106500 | -2.73581600 | -0.19487000 |
| C | -2.69638400 | -1.72048400 | 2.10359900  |
| H | -2.72837700 | -0.77921700 | 2.66097600  |

|   |             |             |             |
|---|-------------|-------------|-------------|
| H | -1.94220500 | -2.37725200 | 2.54293200  |
| H | -3.67208400 | -2.22190200 | 2.15349900  |
| O | -2.28616500 | -1.49844700 | 0.74933500  |
| H | -0.78452600 | -2.18543200 | 0.19194900  |
| N | 3.46309300  | 3.44780000  | -0.48766600 |
| F | 4.55558600  | -2.70719400 | -1.21969100 |
| F | 3.00989100  | -0.22332200 | 2.49975400  |
| F | 0.47125700  | -1.04661900 | 1.99784600  |
| F | 2.01984200  | -3.51534100 | -1.74108600 |
| F | 5.07530200  | -1.04517500 | 0.89394400  |

*p*-FP/DMAP(c)\_TS1

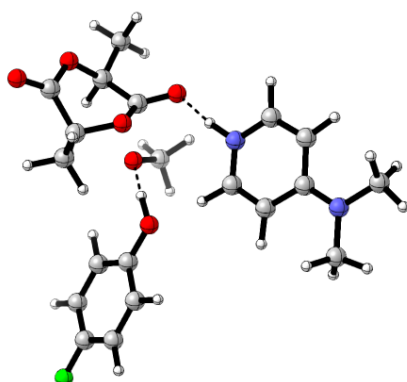

|   |             |             |             |
|---|-------------|-------------|-------------|
| O | 0.94806200  | 1.81056700  | -0.79611600 |
| C | 0.99287600  | 2.37383400  | 0.43665500  |
| O | -0.08438600 | 2.65177300  | 0.98330600  |
| H | 2.94050300  | 0.65548300  | -3.23314900 |
| C | 1.98566800  | 0.85117200  | -2.73748400 |
| H | 1.37753400  | 1.47663200  | -3.39899200 |
| H | 1.47223000  | -0.09722000 | -2.55472600 |
| C | 2.23171800  | 1.54965300  | -1.41494000 |
| H | 2.80623100  | 0.90300600  | -0.73679700 |
| C | 2.29642200  | 3.13704500  | 0.74466200  |
| H | 3.03248500  | 2.42290500  | 1.12107700  |
| O | 2.82331700  | 3.71217600  | -0.49103400 |
| C | 2.95843900  | 2.88947700  | -1.55759700 |
| O | 3.58249600  | 3.23499500  | -2.52890200 |
| C | 2.09995600  | 4.28086900  | 1.72006200  |
| H | 1.36459200  | 4.99595500  | 1.33920600  |
| H | 1.73974000  | 3.89047800  | 2.67611000  |
| H | 3.05334700  | 4.79447900  | 1.87834700  |
| C | -4.59396200 | 1.28379000  | 0.19162800  |
| C | -3.38788700 | 1.90034200  | 0.43479500  |
| C | -2.20377400 | -0.10166600 | 0.11690400  |
| C | -3.37468900 | -0.78469600 | -0.13630800 |



|   |             |             |             |
|---|-------------|-------------|-------------|
| C | -4.62812800 | -0.11079900 | -0.10809800 |
| H | -5.49715800 | 1.87880600  | 0.23424200  |
| H | -3.31336600 | 2.95817100  | 0.66680700  |
| H | -1.22586800 | -0.59053400 | 0.10682700  |
| H | -3.30546800 | -1.84301800 | -0.35311200 |
| C | -7.06589100 | -0.03515300 | -0.31580500 |
| H | -7.09186600 | 0.76857100  | -1.06365300 |
| H | -7.87716800 | -0.72938700 | -0.53774800 |
| H | -7.25181600 | 0.39970300  | 0.67530900  |
| C | -5.79526800 | -2.19059600 | -0.65432400 |
| H | -5.37483400 | -2.77416600 | 0.17497500  |
| H | -6.82241300 | -2.52005000 | -0.81515300 |
| H | -5.22015700 | -2.40763000 | -1.56390300 |
| N | -2.22400200 | 1.22028700  | 0.39839200  |
| H | -1.31583100 | 1.75003000  | 0.59479400  |
| C | 3.33764400  | -3.74395700 | 0.76100000  |
| C | 2.61337000  | -2.55028500 | 0.82935600  |
| C | 1.34186300  | -2.44031000 | 0.22628300  |
| C | 0.82584200  | -3.56475300 | -0.45013600 |
| C | 1.54571500  | -4.75993400 | -0.51999400 |
| C | 2.79263300  | -4.83093400 | 0.08930800  |
| H | 4.31663200  | -3.83227100 | 1.22463100  |
| H | 1.14983800  | -5.62719400 | -1.04183000 |
| O | 0.61739800  | -1.31029900 | 0.27243000  |
| C | 1.34110600  | 0.60194700  | 2.77650700  |
| H | 0.42824800  | 1.18096800  | 3.01442200  |
| H | 2.17173600  | 1.03832300  | 3.36073500  |
| H | 1.18479600  | -0.42398700 | 3.15335700  |
| O | 1.61695700  | 0.60232400  | 1.40168700  |
| H | 1.10429100  | -0.45860400 | 0.79900200  |
| H | -0.14869800 | -3.48562000 | -0.92650200 |
| H | 3.02590800  | -1.68901900 | 1.34830700  |
| F | 3.50084600  | -6.00062700 | 0.02346000  |
| N | -5.79653500 | -0.75910400 | -0.35261200 |

*p*-FP/DMAP(c)\_TS2

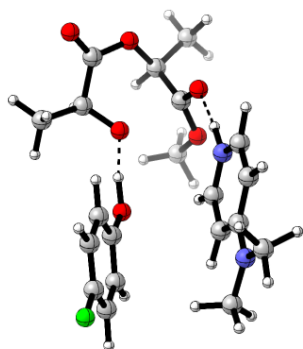

|   |             |             |             |
|---|-------------|-------------|-------------|
| O | -2.14718200 | 0.78907600  | -0.05646000 |
| C | -2.83886400 | -1.16633700 | 0.60785300  |
| O | -2.29328000 | -1.96047900 | -0.16240000 |
| H | -3.28053100 | 3.29249600  | -2.03303500 |
| C | -2.49682600 | 2.69629100  | -1.55299200 |
| H | -1.84954400 | 2.29273700  | -2.33896700 |
| H | -1.90444500 | 3.34900200  | -0.90233500 |
| C | -3.10035800 | 1.56106200  | -0.71994800 |
| H | -3.81546200 | 2.03421500  | -0.00319600 |
| C | -4.28562700 | -0.72653700 | 0.37628100  |
| H | -4.50572300 | 0.17040700  | 0.96245700  |
| O | -4.50528300 | -0.45994800 | -1.01171700 |
| C | -3.96334600 | 0.64838600  | -1.60870600 |
| O | -4.20316600 | 0.83016000  | -2.77698900 |
| C | -5.25039800 | -1.85102400 | 0.75664000  |
| H | -5.04760700 | -2.73680700 | 0.14699300  |
| H | -5.14132200 | -2.11711800 | 1.81444300  |
| H | -6.28053200 | -1.52616700 | 0.57869700  |
| C | 2.36730000  | -1.24921000 | 0.76611800  |
| C | 0.99287600  | -1.31448600 | 0.78111400  |
| C | 0.98245100  | -2.89505300 | -0.94742400 |
| C | 2.35674600  | -2.88588200 | -1.02309000 |
| C | 3.11062200  | -2.03467400 | -0.15993200 |
| H | 2.85102300  | -0.55471200 | 1.44019400  |
| H | 0.38364000  | -0.70374200 | 1.44031900  |
| H | 0.36968100  | -3.50941700 | -1.59949300 |
| H | 2.83735200  | -3.51594000 | -1.76046100 |
| C | 5.19707300  | -2.76569800 | -1.20608500 |
| H | 6.26637500  | -2.59963700 | -1.07046700 |
| H | 5.00161400  | -3.83736600 | -1.07179900 |
| H | 4.93465500  | -2.48539900 | -2.23563000 |
| C | 5.19603800  | -1.02039100 | 0.61914500  |
| H | 5.05740600  | -1.25008000 | 1.68358600  |
| H | 6.26014000  | -1.09383700 | 0.39177900  |
| H | 4.87435500  | 0.01222400  | 0.43424000  |

|   |             |             |             |
|---|-------------|-------------|-------------|
| N | 0.31867200  | -2.12630600 | -0.06068200 |
| H | -0.75220400 | -2.10041600 | -0.05876800 |
| C | 2.31244900  | 2.27739700  | -1.07502700 |
| C | 1.05982400  | 1.95013300  | -0.54679000 |
| C | 0.80625100  | 2.07290400  | 0.83599700  |
| C | 1.84194800  | 2.54504900  | 1.66922200  |
| C | 3.09657100  | 2.86813800  | 1.14595200  |
| C | 3.31351900  | 2.72177000  | -0.22023800 |
| H | 2.51017900  | 2.18960000  | -2.14024700 |
| H | 3.89409100  | 3.24028400  | 1.78400900  |
| O | -0.36353600 | 1.73556300  | 1.40038700  |
| C | -2.79251200 | -0.09879200 | 2.79413500  |
| H | -2.73990200 | 0.89745300  | 2.34853700  |
| H | -2.11165200 | -0.15493000 | 3.64569700  |
| H | -3.80970200 | -0.33096100 | 3.13183200  |
| O | -2.31894500 | -1.08489400 | 1.86076300  |
| H | -1.10195900 | 1.40391600  | 0.72128400  |
| H | 1.64151500  | 2.65777000  | 2.73175100  |
| H | 0.26840700  | 1.59081400  | -1.19790200 |
| F | 4.54744300  | 3.02698900  | -0.73524500 |
| N | 4.46416900  | -1.96674900 | -0.22622400 |

*p*-FP/DMAP(c)\_Int3

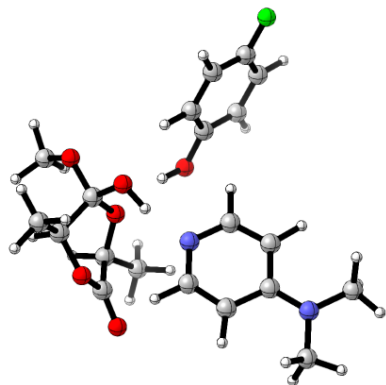

|   |             |             |             |
|---|-------------|-------------|-------------|
| O | 1.28675100  | -1.78365800 | 0.69875200  |
| C | 1.37922100  | -2.11428600 | -0.70655900 |
| O | 0.85689900  | -1.09002800 | -1.43811900 |
| H | -0.00064900 | -2.72241200 | 3.64532500  |
| C | 0.46521500  | -2.02927900 | 2.93943600  |
| H | -0.17705800 | -1.14939000 | 2.84129800  |
| H | 1.43779700  | -1.71445900 | 3.32936800  |
| C | 0.64475200  | -2.71182900 | 1.59415500  |
| H | 1.28417200  | -3.60335400 | 1.71815600  |
| C | 0.68051600  | -3.47644100 | -0.95803200 |
| H | 1.26840900  | -4.27571400 | -0.48805600 |

|   |             |             |             |
|---|-------------|-------------|-------------|
| O | -0.63146900 | -3.47375200 | -0.33034000 |
| C | -0.68193300 | -3.18709700 | 0.99243300  |
| O | -1.71205500 | -3.30956000 | 1.60540300  |
| C | 0.48098000  | -3.78416700 | -2.42965200 |
| H | -0.14571600 | -3.02127100 | -2.89885500 |
| H | 1.45050900  | -3.79366100 | -2.93709400 |
| H | 0.00710500  | -4.76437100 | -2.54376400 |
| C | -2.67565100 | 1.98626700  | -0.32860900 |
| C | -1.54423800 | 1.21962000  | -0.56733000 |
| C | -2.75904900 | -0.71468300 | -0.68693700 |
| C | -3.95285900 | -0.04690400 | -0.45389900 |
| C | -3.94648300 | 1.35907400  | -0.26899900 |
| H | -2.56051300 | 3.05443600  | -0.18726300 |
| H | -0.56756700 | 1.69911200  | -0.61265400 |
| H | -2.76117900 | -1.79483200 | -0.81796800 |
| H | -4.86971800 | -0.62260400 | -0.40848700 |
| C | -6.36856600 | 1.37013800  | 0.10128600  |
| H | -7.16511300 | 2.10368300  | 0.23937400  |
| H | -6.60573000 | 0.78226000  | -0.79518600 |
| H | -6.37040300 | 0.69297700  | 0.96875900  |
| C | -5.03221700 | 3.49829200  | 0.23082400  |
| H | -4.55442500 | 4.04197900  | -0.59466400 |
| H | -6.04611800 | 3.88691900  | 0.34317200  |
| H | -4.47624000 | 3.71598100  | 1.15533300  |
| N | -1.55758100 | -0.11332300 | -0.75003200 |
| H | -0.07405400 | -0.83656100 | -1.13480400 |
| C | 3.40134300  | 4.07182200  | 0.91330800  |
| C | 2.98983400  | 2.95464700  | 1.64257400  |
| C | 2.58675100  | 1.78558100  | 0.98065900  |
| C | 2.59760300  | 1.73869000  | -0.42182600 |
| C | 3.01031300  | 2.85788500  | -1.15395900 |
| C | 3.40358900  | 4.00383900  | -0.47570500 |
| H | 3.71766100  | 4.98419100  | 1.41092100  |
| H | 3.02792600  | 2.83739900  | -2.24000400 |
| O | 2.19747100  | 0.73187900  | 1.75630800  |
| C | 3.63202100  | -2.91477200 | -0.28284700 |
| H | 3.61223200  | -2.57540900 | 0.75940100  |
| H | 4.62372200  | -2.72658100 | -0.70104400 |
| H | 3.43729600  | -3.99672700 | -0.32397100 |
| O | 2.72874800  | -2.16656600 | -1.09204000 |
| H | 1.91255500  | -0.02656500 | 1.21614900  |
| H | 2.28768800  | 0.83422800  | -0.94112400 |
| H | 2.97726900  | 2.97458000  | 2.72886400  |
| F | 3.80475500  | 5.09576400  | -1.19116500 |

|   |             |            |             |
|---|-------------|------------|-------------|
| N | -5.09817000 | 2.06895000 | -0.04601300 |
|---|-------------|------------|-------------|

*p*-FP/DMAP(c)\_Int4

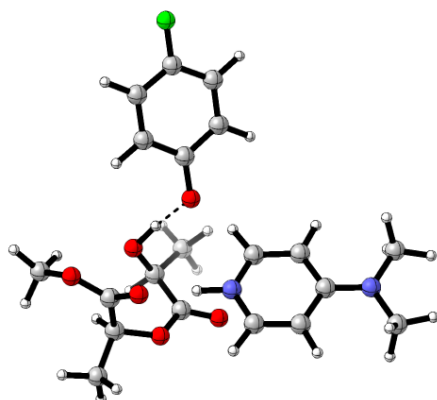

|   |             |             |             |
|---|-------------|-------------|-------------|
| O | 2.05132400  | -1.28768800 | 1.04949800  |
| C | 1.36246100  | -2.59138400 | -1.25513800 |
| O | 0.49557700  | -1.95463600 | -1.82650900 |
| H | 0.68293600  | -1.31952100 | 4.15829400  |
| C | 1.23297600  | -0.85917800 | 3.33066200  |
| H | 0.72921600  | 0.06542600  | 3.03528900  |
| H | 2.24607000  | -0.61204000 | 3.66513100  |
| C | 1.33016500  | -1.81360700 | 2.14118700  |
| H | 1.85750500  | -2.72555200 | 2.47540600  |
| C | 1.02684300  | -3.57214000 | -0.12129400 |
| H | 1.87051100  | -3.67371900 | 0.56084700  |
| O | -0.13336200 | -3.10751200 | 0.58003500  |
| C | -0.06588100 | -2.27338800 | 1.67469200  |
| O | -1.11226100 | -1.95733500 | 2.18356300  |
| C | 0.66297800  | -4.93672700 | -0.71622200 |
| H | -0.20448600 | -4.84242500 | -1.37708200 |
| H | 1.49932200  | -5.34678700 | -1.29377700 |
| H | 0.41720400  | -5.63432900 | 0.09067300  |
| C | -2.78587500 | 1.32189800  | 0.04400000  |
| C | -1.64430300 | 0.61560900  | -0.26846500 |
| C | -2.91802600 | -0.98435900 | -1.44518400 |
| C | -4.09112900 | -0.32572900 | -1.16590200 |
| C | -4.06285300 | 0.87598300  | -0.39514000 |
| H | -2.67361200 | 2.21576000  | 0.64392400  |
| H | -0.62895300 | 0.89786900  | 0.06856900  |
| H | -2.88832000 | -1.90411800 | -2.01955900 |
| H | -5.01868500 | -0.74402700 | -1.53459500 |
| C | -6.50031000 | 1.05386700  | -0.53984500 |
| H | -7.27876700 | 1.74045600  | -0.20489300 |
| H | -6.55225700 | 0.99089900  | -1.63486400 |

|   |             |             |             |
|---|-------------|-------------|-------------|
| H | -6.71612100 | 0.06231500  | -0.11926500 |
| C | -5.14028000 | 2.77083200  | 0.71466900  |
| H | -4.52010400 | 3.53824100  | 0.23429000  |
| H | -6.14824800 | 3.17158100  | 0.82901500  |
| H | -4.73543100 | 2.56711800  | 1.71473400  |
| N | -1.73051800 | -0.51364600 | -1.00977600 |
| H | -0.87226600 | -1.04691600 | -1.23295000 |
| C | 3.73829100  | 3.06099600  | -0.91246500 |
| C | 2.98514000  | 1.93928700  | -0.55699700 |
| C | 1.82976100  | 2.04420700  | 0.26318000  |
| C | 1.47638800  | 3.34801100  | 0.70213500  |
| C | 2.22206100  | 4.47499400  | 0.34448500  |
| C | 3.34430100  | 4.31428100  | -0.45852800 |
| H | 4.62092200  | 2.96971200  | -1.54114700 |
| H | 1.94418600  | 5.46826100  | 0.68933800  |
| O | 1.10381200  | 0.99066000  | 0.59871500  |
| C | 3.73292400  | -3.05206700 | -0.99237000 |
| H | 3.77888100  | -2.54459000 | -0.02469000 |
| H | 4.60422600  | -2.79545100 | -1.59702000 |
| H | 3.68574000  | -4.14099000 | -0.87593600 |
| O | 2.60432500  | -2.55536700 | -1.74361000 |
| H | 1.71570400  | -0.31780600 | 0.84210100  |
| H | 0.60630500  | 3.45425200  | 1.34762700  |
| H | 3.27677400  | 0.95491300  | -0.91670600 |
| F | 4.08175100  | 5.41936000  | -0.81154900 |
| N | -5.20135600 | 1.55421000  | -0.09552600 |

*o*-FP/MTBD(a')\_Int1

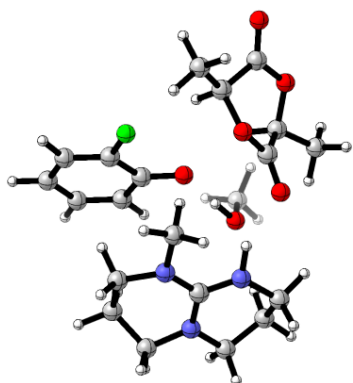

|   |             |             |             |
|---|-------------|-------------|-------------|
| O | -2.67955500 | -0.54520600 | -1.47321600 |
| C | -2.15734200 | -1.48527300 | -0.67878000 |
| O | -1.28130100 | -2.21885400 | -1.09352500 |
| H | -4.78581000 | 2.06665800  | -1.53718700 |
| C | -4.13167100 | 1.30441300  | -1.96874800 |
| H | -4.72011700 | 0.69642800  | -2.66320100 |

|   |             |             |             |
|---|-------------|-------------|-------------|
| H | -3.31867600 | 1.79778000  | -2.50799800 |
| C | -3.55660500 | 0.45162900  | -0.85670600 |
| H | -2.92413200 | 1.05579500  | -0.19194200 |
| C | -2.73951900 | -1.55594900 | 0.72636100  |
| H | -2.26032000 | -0.73872100 | 1.28527700  |
| O | -4.17581900 | -1.31928900 | 0.68216100  |
| C | -4.62237900 | -0.25391600 | -0.02078300 |
| O | -5.77803000 | 0.08041300  | 0.03299900  |
| C | -2.51277200 | -2.88821000 | 1.41335800  |
| H | -2.92705200 | -3.71165300 | 0.82295700  |
| H | -1.43914000 | -3.04063700 | 1.55113900  |
| H | -2.99901000 | -2.87424700 | 2.39352000  |
| C | 0.17120500  | 4.20393400  | 0.27223600  |
| C | -0.34534500 | 2.92283200  | 0.17537200  |
| C | 0.06357200  | 1.81548500  | 0.97581200  |
| C | 1.08926700  | 2.14363400  | 1.91410800  |
| C | 1.62265400  | 3.42970000  | 2.02984500  |
| C | 1.17807100  | 4.47463800  | 1.21100800  |
| H | -0.22203600 | 4.97898900  | -0.38202700 |
| H | 2.39294600  | 3.61913700  | 2.77620500  |
| O | -0.44922200 | 0.62637500  | 0.83824100  |
| C | 0.23413300  | -1.26460300 | 3.59753500  |
| H | 0.68972900  | -2.09878300 | 4.14541700  |
| H | -0.85749400 | -1.32095400 | 3.74197300  |
| H | 0.58506300  | -0.32499900 | 4.05382700  |
| O | 0.60334400  | -1.37461500 | 2.23575800  |
| H | 0.22280200  | -0.59619000 | 1.73086000  |
| H | 1.44562600  | 1.34634100  | 2.56335900  |
| H | 1.58564900  | 5.47726600  | 1.30600700  |
| F | -1.33386300 | 2.69886300  | -0.76088200 |
| C | 2.42355700  | -0.94975200 | -1.13414300 |
| N | 3.65878200  | -1.10603400 | -0.60032600 |
| N | 2.06576100  | 0.22467500  | -1.68961600 |
| C | 2.85054000  | -3.14111900 | 0.55846900  |
| H | 3.18470700  | -4.11873500 | 0.92408800  |
| H | 2.31899000  | -2.61985500 | 1.36399500  |
| C | 1.90229500  | -3.30509400 | -0.62327900 |
| H | 0.95932000  | -3.76659200 | -0.32162500 |
| H | 2.34978500  | -3.92953700 | -1.41073000 |
| C | 4.06187800  | -2.33160800 | 0.10939700  |
| H | 4.71331000  | -2.92911400 | -0.54770800 |
| H | 4.65968100  | -2.02548200 | 0.97622600  |
| C | 4.64609600  | -0.03446800 | -0.75442600 |
| H | 5.44328200  | -0.21596100 | -0.02778900 |

|   |             |             |             |
|---|-------------|-------------|-------------|
| H | 5.09695700  | -0.07240900 | -1.75870900 |
| C | 3.96765200  | 1.30774300  | -0.50476300 |
| H | 4.67751900  | 2.13258700  | -0.62941500 |
| H | 3.59062300  | 1.34069500  | 0.52350900  |
| C | 2.81368800  | 1.48036700  | -1.48357900 |
| H | 3.17985900  | 1.81343500  | -2.46565200 |
| H | 2.11158700  | 2.23319900  | -1.10805600 |
| C | 0.76819800  | 0.36926400  | -2.36094200 |
| H | 0.56454000  | -0.49953600 | -2.99327800 |
| H | -0.03917800 | 0.50378700  | -1.63196200 |
| H | 0.82175500  | 1.25330600  | -3.00143300 |
| N | 1.56866800  | -1.98681500 | -1.17049200 |
| H | 0.57314500  | -1.79702800 | -1.27212100 |

*m*-FP/MTBD(b')\_Int1

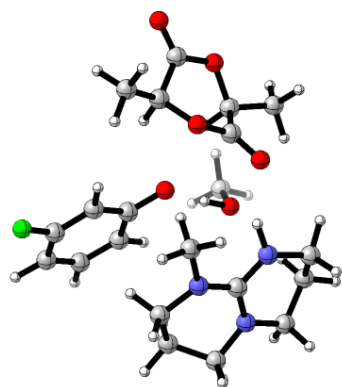

|   |             |             |             |
|---|-------------|-------------|-------------|
| O | -2.67955500 | -0.54520600 | -1.47321600 |
| C | -2.15734200 | -1.48527300 | -0.67878000 |
| O | -1.28130100 | -2.21885400 | -1.09352500 |
| H | -4.78581000 | 2.06665800  | -1.53718700 |
| C | -4.13167100 | 1.30441300  | -1.96874800 |
| H | -4.72011700 | 0.69642800  | -2.66320100 |
| H | -3.31867600 | 1.79778000  | -2.50799800 |
| C | -3.55660500 | 0.45162900  | -0.85670600 |
| H | -2.92413200 | 1.05579500  | -0.19194200 |
| C | -2.73951900 | -1.55594900 | 0.72636100  |
| H | -2.26032000 | -0.73872100 | 1.28527700  |
| O | -4.17581900 | -1.31928900 | 0.68216100  |
| C | -4.62237900 | -0.25391600 | -0.02078300 |
| O | -5.77803000 | 0.08041300  | 0.03299900  |
| C | -2.51277200 | -2.88821000 | 1.41335800  |
| H | -2.92705200 | -3.71165300 | 0.82295700  |
| H | -1.43914000 | -3.04063700 | 1.55113900  |
| H | -2.99901000 | -2.87424700 | 2.39352000  |
| C | 0.17120500  | 4.20393400  | 0.27223600  |



|   |             |             |             |
|---|-------------|-------------|-------------|
| C | -0.34534500 | 2.92283200  | 0.17537200  |
| C | 0.06357200  | 1.81548500  | 0.97581200  |
| C | 1.08926700  | 2.14363400  | 1.91410800  |
| C | 1.62265400  | 3.42970000  | 2.02984500  |
| C | 1.17807100  | 4.47463800  | 1.21100800  |
| H | 2.39294600  | 3.61913700  | 2.77620500  |
| O | -0.44922200 | 0.62637500  | 0.83824100  |
| C | 0.23413300  | -1.26460300 | 3.59753500  |
| H | 0.68972900  | -2.09878300 | 4.14541700  |
| H | -0.85749400 | -1.32095400 | 3.74197300  |
| H | 0.58506300  | -0.32499900 | 4.05382700  |
| O | 0.60334400  | -1.37461500 | 2.23575800  |
| H | 0.22280200  | -0.59619000 | 1.73086000  |
| H | 1.44562600  | 1.34634100  | 2.56335900  |
| H | 1.58564900  | 5.47726600  | 1.30600700  |
| C | 2.42355700  | -0.94975200 | -1.13414300 |
| N | 3.65878200  | -1.10603400 | -0.60032600 |
| N | 2.06576100  | 0.22467500  | -1.68961600 |
| C | 2.85054000  | -3.14111900 | 0.55846900  |
| H | 3.18470700  | -4.11873500 | 0.92408800  |
| H | 2.31899000  | -2.61985500 | 1.36399500  |
| C | 1.90229500  | -3.30509400 | -0.62327900 |
| H | 0.95932000  | -3.76659200 | -0.32162500 |
| H | 2.34978500  | -3.92953700 | -1.41073000 |
| C | 4.06187800  | -2.33160800 | 0.10939700  |
| H | 4.71331000  | -2.92911400 | -0.54770800 |
| H | 4.65968100  | -2.02548200 | 0.97622600  |
| C | 4.64609600  | -0.03446800 | -0.75442600 |
| H | 5.44328200  | -0.21596100 | -0.02778900 |
| H | 5.09695700  | -0.07240900 | -1.75870900 |
| C | 3.96765200  | 1.30774300  | -0.50476300 |
| H | 4.67751900  | 2.13258700  | -0.62941500 |
| H | 3.59062300  | 1.34069500  | 0.52350900  |
| C | 2.81368800  | 1.48036700  | -1.48357900 |
| H | 3.17985900  | 1.81343500  | -2.46565200 |
| H | 2.11158700  | 2.23319900  | -1.10805600 |
| C | 0.76819800  | 0.36926400  | -2.36094200 |
| H | 0.56454000  | -0.49953600 | -2.99327800 |
| H | -0.03917800 | 0.50378700  | -1.63196200 |
| H | 0.82175500  | 1.25330600  | -3.00143300 |
| N | 1.56866800  | -1.98681500 | -1.17049200 |
| H | 0.57314500  | -1.79702800 | -1.27212100 |
| H | -1.11190494 | 2.74915214  | -0.55065910 |
| F | -0.31680100 | 5.16576527  | -0.53969426 |

*p*-FP/MTBD(c')\_Int1

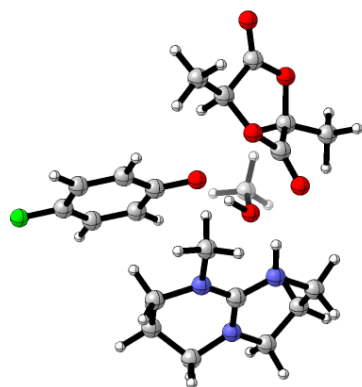

|   |             |             |             |
|---|-------------|-------------|-------------|
| O | -2.67955500 | -0.54520600 | -1.47321600 |
| C | -2.15734200 | -1.48527300 | -0.67878000 |
| O | -1.28130100 | -2.21885400 | -1.09352500 |
| H | -4.78581000 | 2.06665800  | -1.53718700 |
| C | -4.13167100 | 1.30441300  | -1.96874800 |
| H | -4.72011700 | 0.69642800  | -2.66320100 |
| H | -3.31867600 | 1.79778000  | -2.50799800 |
| C | -3.55660500 | 0.45162900  | -0.85670600 |
| H | -2.92413200 | 1.05579500  | -0.19194200 |
| C | -2.73951900 | -1.55594900 | 0.72636100  |
| H | -2.26032000 | -0.73872100 | 1.28527700  |
| O | -4.17581900 | -1.31928900 | 0.68216100  |
| C | -4.62237900 | -0.25391600 | -0.02078300 |
| O | -5.77803000 | 0.08041300  | 0.03299900  |
| C | -2.51277200 | -2.88821000 | 1.41335800  |
| H | -2.92705200 | -3.71165300 | 0.82295700  |
| H | -1.43914000 | -3.04063700 | 1.55113900  |
| H | -2.99901000 | -2.87424700 | 2.39352000  |
| C | 0.17120500  | 4.20393400  | 0.27223600  |
| C | -0.34534500 | 2.92283200  | 0.17537200  |
| C | 0.06357200  | 1.81548500  | 0.97581200  |
| C | 1.08926700  | 2.14363400  | 1.91410800  |
| C | 1.62265400  | 3.42970000  | 2.02984500  |
| C | 1.17807100  | 4.47463800  | 1.21100800  |
| H | 2.39294600  | 3.61913700  | 2.77620500  |
| O | -0.44922200 | 0.62637500  | 0.83824100  |
| C | 0.23413300  | -1.26460300 | 3.59753500  |
| H | 0.68972900  | -2.09878300 | 4.14541700  |
| H | -0.85749400 | -1.32095400 | 3.74197300  |
| H | 0.58506300  | -0.32499900 | 4.05382700  |
| O | 0.60334400  | -1.37461500 | 2.23575800  |
| H | 0.22280200  | -0.59619000 | 1.73086000  |

|   |             |             |             |
|---|-------------|-------------|-------------|
| H | 1.44562600  | 1.34634100  | 2.56335900  |
| C | 2.42355700  | -0.94975200 | -1.13414300 |
| N | 3.65878200  | -1.10603400 | -0.60032600 |
| N | 2.06576100  | 0.22467500  | -1.68961600 |
| C | 2.85054000  | -3.14111900 | 0.55846900  |
| H | 3.18470700  | -4.11873500 | 0.92408800  |
| H | 2.31899000  | -2.61985500 | 1.36399500  |
| C | 1.90229500  | -3.30509400 | -0.62327900 |
| H | 0.95932000  | -3.76659200 | -0.32162500 |
| H | 2.34978500  | -3.92953700 | -1.41073000 |
| C | 4.06187800  | -2.33160800 | 0.10939700  |
| H | 4.71331000  | -2.92911400 | -0.54770800 |
| H | 4.65968100  | -2.02548200 | 0.97622600  |
| C | 4.64609600  | -0.03446800 | -0.75442600 |
| H | 5.44328200  | -0.21596100 | -0.02778900 |
| H | 5.09695700  | -0.07240900 | -1.75870900 |
| C | 3.96765200  | 1.30774300  | -0.50476300 |
| H | 4.67751900  | 2.13258700  | -0.62941500 |
| H | 3.59062300  | 1.34069500  | 0.52350900  |
| C | 2.81368800  | 1.48036700  | -1.48357900 |
| H | 3.17985900  | 1.81343500  | -2.46565200 |
| H | 2.11158700  | 2.23319900  | -1.10805600 |
| C | 0.76819800  | 0.36926400  | -2.36094200 |
| H | 0.56454000  | -0.49953600 | -2.99327800 |
| H | -0.03917800 | 0.50378700  | -1.63196200 |
| H | 0.82175500  | 1.25330600  | -3.00143300 |
| N | 1.56866800  | -1.98681500 | -1.17049200 |
| H | 0.57314500  | -1.79702800 | -1.27212100 |
| H | -1.11190494 | 2.74915214  | -0.55065910 |
| H | -0.21558494 | 4.96627434  | -0.37129391 |
| F | 1.68451160  | 5.72046463  | 1.32905007  |

2,3-FP/MTBD(d')\_Int1

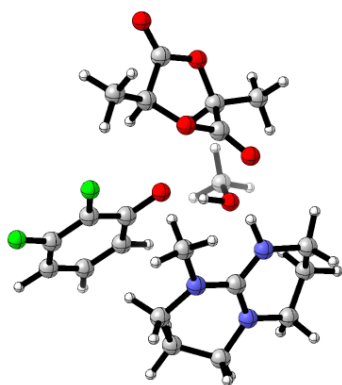

|   |             |             |             |
|---|-------------|-------------|-------------|
| O | -2.67955500 | -0.54520600 | -1.47321600 |
|---|-------------|-------------|-------------|

|   |             |             |             |
|---|-------------|-------------|-------------|
| C | -2.15734200 | -1.48527300 | -0.67878000 |
| O | -1.28130100 | -2.21885400 | -1.09352500 |
| H | -4.78581000 | 2.06665800  | -1.53718700 |
| C | -4.13167100 | 1.30441300  | -1.96874800 |
| H | -4.72011700 | 0.69642800  | -2.66320100 |
| H | -3.31867600 | 1.79778000  | -2.50799800 |
| C | -3.55660500 | 0.45162900  | -0.85670600 |
| H | -2.92413200 | 1.05579500  | -0.19194200 |
| C | -2.73951900 | -1.55594900 | 0.72636100  |
| H | -2.26032000 | -0.73872100 | 1.28527700  |
| O | -4.17581900 | -1.31928900 | 0.68216100  |
| C | -4.62237900 | -0.25391600 | -0.02078300 |
| O | -5.77803000 | 0.08041300  | 0.03299900  |
| C | -2.51277200 | -2.88821000 | 1.41335800  |
| H | -2.92705200 | -3.71165300 | 0.82295700  |
| H | -1.43914000 | -3.04063700 | 1.55113900  |
| H | -2.99901000 | -2.87424700 | 2.39352000  |
| C | 0.17120500  | 4.20393400  | 0.27223600  |
| C | -0.34534500 | 2.92283200  | 0.17537200  |
| C | 0.06357200  | 1.81548500  | 0.97581200  |
| C | 1.08926700  | 2.14363400  | 1.91410800  |
| C | 1.62265400  | 3.42970000  | 2.02984500  |
| C | 1.17807100  | 4.47463800  | 1.21100800  |
| H | 2.39294600  | 3.61913700  | 2.77620500  |
| O | -0.44922200 | 0.62637500  | 0.83824100  |
| C | 0.23413300  | -1.26460300 | 3.59753500  |
| H | 0.68972900  | -2.09878300 | 4.14541700  |
| H | -0.85749400 | -1.32095400 | 3.74197300  |
| H | 0.58506300  | -0.32499900 | 4.05382700  |
| O | 0.60334400  | -1.37461500 | 2.23575800  |
| H | 0.22280200  | -0.59619000 | 1.73086000  |
| H | 1.44562600  | 1.34634100  | 2.56335900  |
| C | 2.42355700  | -0.94975200 | -1.13414300 |
| N | 3.65878200  | -1.10603400 | -0.60032600 |
| N | 2.06576100  | 0.22467500  | -1.68961600 |
| C | 2.85054000  | -3.14111900 | 0.55846900  |
| H | 3.18470700  | -4.11873500 | 0.92408800  |
| H | 2.31899000  | -2.61985500 | 1.36399500  |
| C | 1.90229500  | -3.30509400 | -0.62327900 |
| H | 0.95932000  | -3.76659200 | -0.32162500 |
| H | 2.34978500  | -3.92953700 | -1.41073000 |
| C | 4.06187800  | -2.33160800 | 0.10939700  |
| H | 4.71331000  | -2.92911400 | -0.54770800 |
| H | 4.65968100  | -2.02548200 | 0.97622600  |

|   |             |             |             |
|---|-------------|-------------|-------------|
| C | 4.64609600  | -0.03446800 | -0.75442600 |
| H | 5.44328200  | -0.21596100 | -0.02778900 |
| H | 5.09695700  | -0.07240900 | -1.75870900 |
| C | 3.96765200  | 1.30774300  | -0.50476300 |
| H | 4.67751900  | 2.13258700  | -0.62941500 |
| H | 3.59062300  | 1.34069500  | 0.52350900  |
| C | 2.81368800  | 1.48036700  | -1.48357900 |
| H | 3.17985900  | 1.81343500  | -2.46565200 |
| H | 2.11158700  | 2.23319900  | -1.10805600 |
| C | 0.76819800  | 0.36926400  | -2.36094200 |
| H | 0.56454000  | -0.49953600 | -2.99327800 |
| H | -0.03917800 | 0.50378700  | -1.63196200 |
| H | 0.82175500  | 1.25330600  | -3.00143300 |
| N | 1.56866800  | -1.98681500 | -1.17049200 |
| H | 0.57314500  | -1.79702800 | -1.27212100 |
| F | -1.31250007 | 2.70370320  | -0.74064855 |
| F | -0.31680100 | 5.16576527  | -0.53969426 |
| H | 1.57947207  | 5.46207096  | 1.30456727  |

2,4-FP/MTBD(e')\_Int1

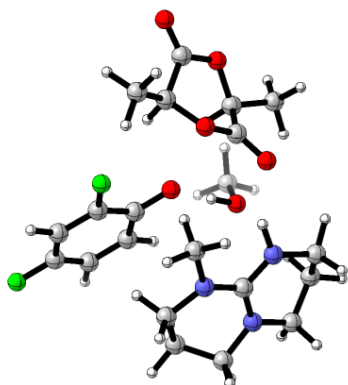

|   |             |             |             |
|---|-------------|-------------|-------------|
| O | -2.67955500 | -0.54520600 | -1.47321600 |
| C | -2.15734200 | -1.48527300 | -0.67878000 |
| O | -1.28130100 | -2.21885400 | -1.09352500 |
| H | -4.78581000 | 2.06665800  | -1.53718700 |
| C | -4.13167100 | 1.30441300  | -1.96874800 |
| H | -4.72011700 | 0.69642800  | -2.66320100 |
| H | -3.31867600 | 1.79778000  | -2.50799800 |
| C | -3.55660500 | 0.45162900  | -0.85670600 |
| H | -2.92413200 | 1.05579500  | -0.19194200 |
| C | -2.73951900 | -1.55594900 | 0.72636100  |
| H | -2.26032000 | -0.73872100 | 1.28527700  |
| O | -4.17581900 | -1.31928900 | 0.68216100  |
| C | -4.62237900 | -0.25391600 | -0.02078300 |
| O | -5.77803000 | 0.08041300  | 0.03299900  |

|   |             |             |             |
|---|-------------|-------------|-------------|
| C | -2.51277200 | -2.88821000 | 1.41335800  |
| H | -2.92705200 | -3.71165300 | 0.82295700  |
| H | -1.43914000 | -3.04063700 | 1.55113900  |
| H | -2.99901000 | -2.87424700 | 2.39352000  |
| C | 0.17120500  | 4.20393400  | 0.27223600  |
| C | -0.34534500 | 2.92283200  | 0.17537200  |
| C | 0.06357200  | 1.81548500  | 0.97581200  |
| C | 1.08926700  | 2.14363400  | 1.91410800  |
| C | 1.62265400  | 3.42970000  | 2.02984500  |
| C | 1.17807100  | 4.47463800  | 1.21100800  |
| H | 2.39294600  | 3.61913700  | 2.77620500  |
| O | -0.44922200 | 0.62637500  | 0.83824100  |
| C | 0.23413300  | -1.26460300 | 3.59753500  |
| H | 0.68972900  | -2.09878300 | 4.14541700  |
| H | -0.85749400 | -1.32095400 | 3.74197300  |
| H | 0.58506300  | -0.32499900 | 4.05382700  |
| O | 0.60334400  | -1.37461500 | 2.23575800  |
| H | 0.22280200  | -0.59619000 | 1.73086000  |
| H | 1.44562600  | 1.34634100  | 2.56335900  |
| C | 2.42355700  | -0.94975200 | -1.13414300 |
| N | 3.65878200  | -1.10603400 | -0.60032600 |
| N | 2.06576100  | 0.22467500  | -1.68961600 |
| C | 2.85054000  | -3.14111900 | 0.55846900  |
| H | 3.18470700  | -4.11873500 | 0.92408800  |
| H | 2.31899000  | -2.61985500 | 1.36399500  |
| C | 1.90229500  | -3.30509400 | -0.62327900 |
| H | 0.95932000  | -3.76659200 | -0.32162500 |
| H | 2.34978500  | -3.92953700 | -1.41073000 |
| C | 4.06187800  | -2.33160800 | 0.10939700  |
| H | 4.71331000  | -2.92911400 | -0.54770800 |
| H | 4.65968100  | -2.02548200 | 0.97622600  |
| C | 4.64609600  | -0.03446800 | -0.75442600 |
| H | 5.44328200  | -0.21596100 | -0.02778900 |
| H | 5.09695700  | -0.07240900 | -1.75870900 |
| C | 3.96765200  | 1.30774300  | -0.50476300 |
| H | 4.67751900  | 2.13258700  | -0.62941500 |
| H | 3.59062300  | 1.34069500  | 0.52350900  |
| C | 2.81368800  | 1.48036700  | -1.48357900 |
| H | 3.17985900  | 1.81343500  | -2.46565200 |
| H | 2.11158700  | 2.23319900  | -1.10805600 |
| C | 0.76819800  | 0.36926400  | -2.36094200 |
| H | 0.56454000  | -0.49953600 | -2.99327800 |
| H | -0.03917800 | 0.50378700  | -1.63196200 |
| H | 0.82175500  | 1.25330600  | -3.00143300 |

|   |             |             |             |
|---|-------------|-------------|-------------|
| N | 1.56866800  | -1.98681500 | -1.17049200 |
| H | 0.57314500  | -1.79702800 | -1.27212100 |
| F | -1.31250007 | 2.70370320  | -0.74064855 |
| F | 1.68451160  | 5.72046463  | 1.32905007  |
| H | -0.21558494 | 4.96627434  | -0.37129391 |

2,6-FP/MTBD(f')\_Int1

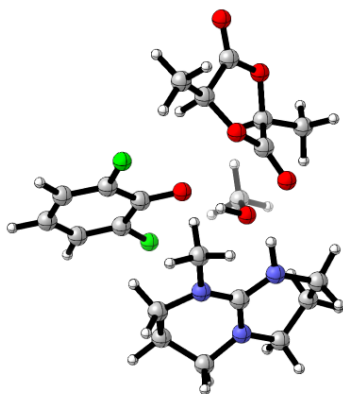

|   |             |             |             |
|---|-------------|-------------|-------------|
| O | -2.67955500 | -0.54520600 | -1.47321600 |
| C | -2.15734200 | -1.48527300 | -0.67878000 |
| O | -1.28130100 | -2.21885400 | -1.09352500 |
| H | -4.78581000 | 2.06665800  | -1.53718700 |
| C | -4.13167100 | 1.30441300  | -1.96874800 |
| H | -4.72011700 | 0.69642800  | -2.66320100 |
| H | -3.31867600 | 1.79778000  | -2.50799800 |
| C | -3.55660500 | 0.45162900  | -0.85670600 |
| H | -2.92413200 | 1.05579500  | -0.19194200 |
| C | -2.73951900 | -1.55594900 | 0.72636100  |
| H | -2.26032000 | -0.73872100 | 1.28527700  |
| O | -4.17581900 | -1.31928900 | 0.68216100  |
| C | -4.62237900 | -0.25391600 | -0.02078300 |
| O | -5.77803000 | 0.08041300  | 0.03299900  |
| C | -2.51277200 | -2.88821000 | 1.41335800  |
| H | -2.92705200 | -3.71165300 | 0.82295700  |
| H | -1.43914000 | -3.04063700 | 1.55113900  |
| H | -2.99901000 | -2.87424700 | 2.39352000  |
| C | 0.17120500  | 4.20393400  | 0.27223600  |
| C | -0.34534500 | 2.92283200  | 0.17537200  |
| C | 0.06357200  | 1.81548500  | 0.97581200  |
| C | 1.08926700  | 2.14363400  | 1.91410800  |
| C | 1.62265400  | 3.42970000  | 2.02984500  |
| C | 1.17807100  | 4.47463800  | 1.21100800  |
| H | 2.39294600  | 3.61913700  | 2.77620500  |
| O | -0.44922200 | 0.62637500  | 0.83824100  |
| C | 0.23413300  | -1.26460300 | 3.59753500  |

|   |             |             |             |
|---|-------------|-------------|-------------|
| H | 0.68972900  | -2.09878300 | 4.14541700  |
| H | -0.85749400 | -1.32095400 | 3.74197300  |
| H | 0.58506300  | -0.32499900 | 4.05382700  |
| O | 0.60334400  | -1.37461500 | 2.23575800  |
| H | 0.22280200  | -0.59619000 | 1.73086000  |
| C | 2.42355700  | -0.94975200 | -1.13414300 |
| N | 3.65878200  | -1.10603400 | -0.60032600 |
| N | 2.06576100  | 0.22467500  | -1.68961600 |
| C | 2.85054000  | -3.14111900 | 0.55846900  |
| H | 3.18470700  | -4.11873500 | 0.92408800  |
| H | 2.31899000  | -2.61985500 | 1.36399500  |
| C | 1.90229500  | -3.30509400 | -0.62327900 |
| H | 0.95932000  | -3.76659200 | -0.32162500 |
| H | 2.34978500  | -3.92953700 | -1.41073000 |
| C | 4.06187800  | -2.33160800 | 0.10939700  |
| H | 4.71331000  | -2.92911400 | -0.54770800 |
| H | 4.65968100  | -2.02548200 | 0.97622600  |
| C | 4.64609600  | -0.03446800 | -0.75442600 |
| H | 5.44328200  | -0.21596100 | -0.02778900 |
| H | 5.09695700  | -0.07240900 | -1.75870900 |
| C | 3.96765200  | 1.30774300  | -0.50476300 |
| H | 4.67751900  | 2.13258700  | -0.62941500 |
| H | 3.59062300  | 1.34069500  | 0.52350900  |
| C | 2.81368800  | 1.48036700  | -1.48357900 |
| H | 3.17985900  | 1.81343500  | -2.46565200 |
| H | 2.11158700  | 2.23319900  | -1.10805600 |
| C | 0.76819800  | 0.36926400  | -2.36094200 |
| H | 0.56454000  | -0.49953600 | -2.99327800 |
| H | -0.03917800 | 0.50378700  | -1.63196200 |
| H | 0.82175500  | 1.25330600  | -3.00143300 |
| N | 1.56866800  | -1.98681500 | -1.17049200 |
| H | 0.57314500  | -1.79702800 | -1.27212100 |
| F | -1.31250007 | 2.70370320  | -0.74064855 |
| H | -0.21558494 | 4.96627434  | -0.37129391 |
| F | 1.53135623  | 1.15453410  | 2.71955104  |
| H | 1.57947207  | 5.46207096  | 1.30456727  |

2,3,6-FP/MTBD(g')\_Int1



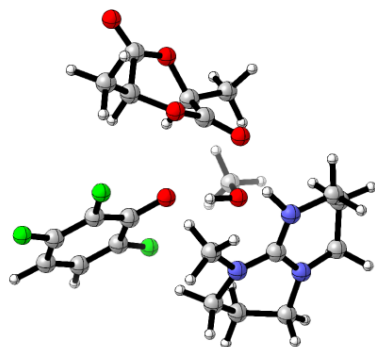

|   |             |             |             |
|---|-------------|-------------|-------------|
| O | -2.67955500 | -0.54520600 | -1.47321600 |
| C | -2.15734200 | -1.48527300 | -0.67878000 |
| O | -1.28130100 | -2.21885400 | -1.09352500 |
| H | -4.78581000 | 2.06665800  | -1.53718700 |
| C | -4.13167100 | 1.30441300  | -1.96874800 |
| H | -4.72011700 | 0.69642800  | -2.66320100 |
| H | -3.31867600 | 1.79778000  | -2.50799800 |
| C | -3.55660500 | 0.45162900  | -0.85670600 |
| H | -2.92413200 | 1.05579500  | -0.19194200 |
| C | -2.73951900 | -1.55594900 | 0.72636100  |
| H | -2.26032000 | -0.73872100 | 1.28527700  |
| O | -4.17581900 | -1.31928900 | 0.68216100  |
| C | -4.62237900 | -0.25391600 | -0.02078300 |
| O | -5.77803000 | 0.08041300  | 0.03299900  |
| C | -2.51277200 | -2.88821000 | 1.41335800  |
| H | -2.92705200 | -3.71165300 | 0.82295700  |
| H | -1.43914000 | -3.04063700 | 1.55113900  |
| H | -2.99901000 | -2.87424700 | 2.39352000  |
| C | 0.17120500  | 4.20393400  | 0.27223600  |
| C | -0.34534500 | 2.92283200  | 0.17537200  |
| C | 0.06357200  | 1.81548500  | 0.97581200  |
| C | 1.08926700  | 2.14363400  | 1.91410800  |
| C | 1.62265400  | 3.42970000  | 2.02984500  |
| C | 1.17807100  | 4.47463800  | 1.21100800  |
| H | 2.39294600  | 3.61913700  | 2.77620500  |
| O | -0.44922200 | 0.62637500  | 0.83824100  |
| C | 0.23413300  | -1.26460300 | 3.59753500  |
| H | 0.68972900  | -2.09878300 | 4.14541700  |
| H | -0.85749400 | -1.32095400 | 3.74197300  |
| H | 0.58506300  | -0.32499900 | 4.05382700  |
| O | 0.60334400  | -1.37461500 | 2.23575800  |
| H | 0.22280200  | -0.59619000 | 1.73086000  |
| H | 1.58564900  | 5.47726600  | 1.30600700  |
| F | -1.33386300 | 2.69886300  | -0.76088200 |
| C | 2.42355700  | -0.94975200 | -1.13414300 |

|   |             |             |             |
|---|-------------|-------------|-------------|
| N | 3.65878200  | -1.10603400 | -0.60032600 |
| N | 2.06576100  | 0.22467500  | -1.68961600 |
| C | 2.85054000  | -3.14111900 | 0.55846900  |
| H | 3.18470700  | -4.11873500 | 0.92408800  |
| H | 2.31899000  | -2.61985500 | 1.36399500  |
| C | 1.90229500  | -3.30509400 | -0.62327900 |
| H | 0.95932000  | -3.76659200 | -0.32162500 |
| H | 2.34978500  | -3.92953700 | -1.41073000 |
| C | 4.06187800  | -2.33160800 | 0.10939700  |
| H | 4.71331000  | -2.92911400 | -0.54770800 |
| H | 4.65968100  | -2.02548200 | 0.97622600  |
| C | 4.64609600  | -0.03446800 | -0.75442600 |
| H | 5.44328200  | -0.21596100 | -0.02778900 |
| H | 5.09695700  | -0.07240900 | -1.75870900 |
| C | 3.96765200  | 1.30774300  | -0.50476300 |
| H | 4.67751900  | 2.13258700  | -0.62941500 |
| H | 3.59062300  | 1.34069500  | 0.52350900  |
| C | 2.81368800  | 1.48036700  | -1.48357900 |
| H | 3.17985900  | 1.81343500  | -2.46565200 |
| H | 2.11158700  | 2.23319900  | -1.10805600 |
| C | 0.76819800  | 0.36926400  | -2.36094200 |
| H | 0.56454000  | -0.49953600 | -2.99327800 |
| H | -0.03917800 | 0.50378700  | -1.63196200 |
| H | 0.82175500  | 1.25330600  | -3.00143300 |
| N | 1.56866800  | -1.98681500 | -1.17049200 |
| H | 0.57314500  | -1.79702800 | -1.27212100 |
| F | -0.31680100 | 5.16576527  | -0.53969426 |
| F | 1.53135623  | 1.15453410  | 2.71955104  |

3,4,5-FP/MTBD(h')\_Int1

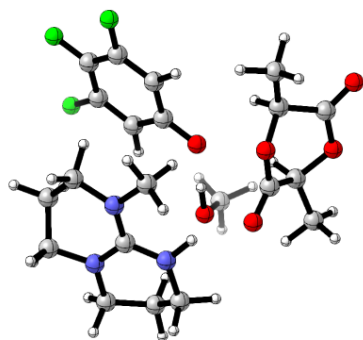

|   |             |             |             |
|---|-------------|-------------|-------------|
| O | -2.67955500 | -0.54520600 | -1.47321600 |
| C | -2.15734200 | -1.48527300 | -0.67878000 |
| O | -1.28130100 | -2.21885400 | -1.09352500 |
| H | -4.78581000 | 2.06665800  | -1.53718700 |
| C | -4.13167100 | 1.30441300  | -1.96874800 |

|   |             |             |             |
|---|-------------|-------------|-------------|
| H | -4.72011700 | 0.69642800  | -2.66320100 |
| H | -3.31867600 | 1.79778000  | -2.50799800 |
| C | -3.55660500 | 0.45162900  | -0.85670600 |
| H | -2.92413200 | 1.05579500  | -0.19194200 |
| C | -2.73951900 | -1.55594900 | 0.72636100  |
| H | -2.26032000 | -0.73872100 | 1.28527700  |
| O | -4.17581900 | -1.31928900 | 0.68216100  |
| C | -4.62237900 | -0.25391600 | -0.02078300 |
| O | -5.77803000 | 0.08041300  | 0.03299900  |
| C | -2.51277200 | -2.88821000 | 1.41335800  |
| H | -2.92705200 | -3.71165300 | 0.82295700  |
| H | -1.43914000 | -3.04063700 | 1.55113900  |
| H | -2.99901000 | -2.87424700 | 2.39352000  |
| C | 0.17120500  | 4.20393400  | 0.27223600  |
| C | -0.34534500 | 2.92283200  | 0.17537200  |
| C | 0.06357200  | 1.81548500  | 0.97581200  |
| C | 1.08926700  | 2.14363400  | 1.91410800  |
| C | 1.62265400  | 3.42970000  | 2.02984500  |
| C | 1.17807100  | 4.47463800  | 1.21100800  |
| O | -0.44922200 | 0.62637500  | 0.83824100  |
| C | 0.23413300  | -1.26460300 | 3.59753500  |
| H | 0.68972900  | -2.09878300 | 4.14541700  |
| H | -0.85749400 | -1.32095400 | 3.74197300  |
| H | 0.58506300  | -0.32499900 | 4.05382700  |
| O | 0.60334400  | -1.37461500 | 2.23575800  |
| H | 0.22280200  | -0.59619000 | 1.73086000  |
| C | 2.42355700  | -0.94975200 | -1.13414300 |
| N | 3.65878200  | -1.10603400 | -0.60032600 |
| N | 2.06576100  | 0.22467500  | -1.68961600 |
| C | 2.85054000  | -3.14111900 | 0.55846900  |
| H | 3.18470700  | -4.11873500 | 0.92408800  |
| H | 2.31899000  | -2.61985500 | 1.36399500  |
| C | 1.90229500  | -3.30509400 | -0.62327900 |
| H | 0.95932000  | -3.76659200 | -0.32162500 |
| H | 2.34978500  | -3.92953700 | -1.41073000 |
| C | 4.06187800  | -2.33160800 | 0.10939700  |
| H | 4.71331000  | -2.92911400 | -0.54770800 |
| H | 4.65968100  | -2.02548200 | 0.97622600  |
| C | 4.64609600  | -0.03446800 | -0.75442600 |
| H | 5.44328200  | -0.21596100 | -0.02778900 |
| H | 5.09695700  | -0.07240900 | -1.75870900 |
| C | 3.96765200  | 1.30774300  | -0.50476300 |
| H | 4.67751900  | 2.13258700  | -0.62941500 |
| H | 3.59062300  | 1.34069500  | 0.52350900  |

|   |             |             |             |
|---|-------------|-------------|-------------|
| C | 2.81368800  | 1.48036700  | -1.48357900 |
| H | 3.17985900  | 1.81343500  | -2.46565200 |
| H | 2.11158700  | 2.23319900  | -1.10805600 |
| C | 0.76819800  | 0.36926400  | -2.36094200 |
| H | 0.56454000  | -0.49953600 | -2.99327800 |
| H | -0.03917800 | 0.50378700  | -1.63196200 |
| H | 0.82175500  | 1.25330600  | -3.00143300 |
| N | 1.56866800  | -1.98681500 | -1.17049200 |
| H | 0.57314500  | -1.79702800 | -1.27212100 |
| F | -0.31680100 | 5.16576527  | -0.53969426 |
| F | 1.68451160  | 5.72046463  | 1.32905007  |
| F | 2.57741316  | 3.66450279  | 2.95494100  |
| H | -1.11190494 | 2.74915214  | -0.55065910 |
| H | 1.43966365  | 1.35968074  | 2.55249619  |

2,3,5,6-FP/MTBD(I')\_Int1

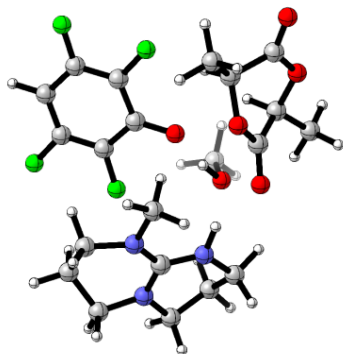

|   |             |             |             |
|---|-------------|-------------|-------------|
| O | -2.67955500 | -0.54520600 | -1.47321600 |
| C | -2.15734200 | -1.48527300 | -0.67878000 |
| O | -1.28130100 | -2.21885400 | -1.09352500 |
| H | -4.78581000 | 2.06665800  | -1.53718700 |
| C | -4.13167100 | 1.30441300  | -1.96874800 |
| H | -4.72011700 | 0.69642800  | -2.66320100 |
| H | -3.31867600 | 1.79778000  | -2.50799800 |
| C | -3.55660500 | 0.45162900  | -0.85670600 |
| H | -2.92413200 | 1.05579500  | -0.19194200 |
| C | -2.73951900 | -1.55594900 | 0.72636100  |
| H | -2.26032000 | -0.73872100 | 1.28527700  |
| O | -4.17581900 | -1.31928900 | 0.68216100  |
| C | -4.62237900 | -0.25391600 | -0.02078300 |
| O | -5.77803000 | 0.08041300  | 0.03299900  |
| C | -2.51277200 | -2.88821000 | 1.41335800  |
| H | -2.92705200 | -3.71165300 | 0.82295700  |
| H | -1.43914000 | -3.04063700 | 1.55113900  |
| H | -2.99901000 | -2.87424700 | 2.39352000  |
| C | 0.17120500  | 4.20393400  | 0.27223600  |

|   |             |             |             |
|---|-------------|-------------|-------------|
| C | -0.34534500 | 2.92283200  | 0.17537200  |
| C | 0.06357200  | 1.81548500  | 0.97581200  |
| C | 1.08926700  | 2.14363400  | 1.91410800  |
| C | 1.62265400  | 3.42970000  | 2.02984500  |
| C | 1.17807100  | 4.47463800  | 1.21100800  |
| O | -0.44922200 | 0.62637500  | 0.83824100  |
| C | 0.23413300  | -1.26460300 | 3.59753500  |
| H | 0.68972900  | -2.09878300 | 4.14541700  |
| H | -0.85749400 | -1.32095400 | 3.74197300  |
| H | 0.58506300  | -0.32499900 | 4.05382700  |
| O | 0.60334400  | -1.37461500 | 2.23575800  |
| H | 0.22280200  | -0.59619000 | 1.73086000  |
| H | 1.58564900  | 5.47726600  | 1.30600700  |
| F | -1.33386300 | 2.69886300  | -0.76088200 |
| C | 2.42355700  | -0.94975200 | -1.13414300 |
| N | 3.65878200  | -1.10603400 | -0.60032600 |
| N | 2.06576100  | 0.22467500  | -1.68961600 |
| C | 2.85054000  | -3.14111900 | 0.55846900  |
| H | 3.18470700  | -4.11873500 | 0.92408800  |
| H | 2.31899000  | -2.61985500 | 1.36399500  |
| C | 1.90229500  | -3.30509400 | -0.62327900 |
| H | 0.95932000  | -3.76659200 | -0.32162500 |
| H | 2.34978500  | -3.92953700 | -1.41073000 |
| C | 4.06187800  | -2.33160800 | 0.10939700  |
| H | 4.71331000  | -2.92911400 | -0.54770800 |
| H | 4.65968100  | -2.02548200 | 0.97622600  |
| C | 4.64609600  | -0.03446800 | -0.75442600 |
| H | 5.44328200  | -0.21596100 | -0.02778900 |
| H | 5.09695700  | -0.07240900 | -1.75870900 |
| C | 3.96765200  | 1.30774300  | -0.50476300 |
| H | 4.67751900  | 2.13258700  | -0.62941500 |
| H | 3.59062300  | 1.34069500  | 0.52350900  |
| C | 2.81368800  | 1.48036700  | -1.48357900 |
| H | 3.17985900  | 1.81343500  | -2.46565200 |
| H | 2.11158700  | 2.23319900  | -1.10805600 |
| C | 0.76819800  | 0.36926400  | -2.36094200 |
| H | 0.56454000  | -0.49953600 | -2.99327800 |
| H | -0.03917800 | 0.50378700  | -1.63196200 |
| H | 0.82175500  | 1.25330600  | -3.00143300 |
| N | 1.56866800  | -1.98681500 | -1.17049200 |
| H | 0.57314500  | -1.79702800 | -1.27212100 |
| F | -0.31680100 | 5.16576527  | -0.53969426 |
| F | 1.53135623  | 1.15453410  | 2.71955104  |
| F | 2.57741316  | 3.66450279  | 2.95494100  |

## 2,3,4,5,6-FP/MTBD(j')\_Int1

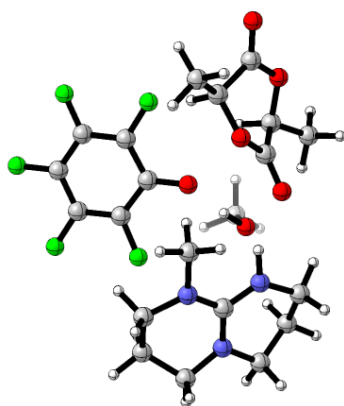

|   |             |             |             |
|---|-------------|-------------|-------------|
| O | -2.67955500 | -0.54520600 | -1.47321600 |
| C | -2.15734200 | -1.48527300 | -0.67878000 |
| O | -1.28130100 | -2.21885400 | -1.09352500 |
| H | -4.78581000 | 2.06665800  | -1.53718700 |
| C | -4.13167100 | 1.30441300  | -1.96874800 |
| H | -4.72011700 | 0.69642800  | -2.66320100 |
| H | -3.31867600 | 1.79778000  | -2.50799800 |
| C | -3.55660500 | 0.45162900  | -0.85670600 |
| H | -2.92413200 | 1.05579500  | -0.19194200 |
| C | -2.73951900 | -1.55594900 | 0.72636100  |
| H | -2.26032000 | -0.73872100 | 1.28527700  |
| O | -4.17581900 | -1.31928900 | 0.68216100  |
| C | -4.62237900 | -0.25391600 | -0.02078300 |
| O | -5.77803000 | 0.08041300  | 0.03299900  |
| C | -2.51277200 | -2.88821000 | 1.41335800  |
| H | -2.92705200 | -3.71165300 | 0.82295700  |
| H | -1.43914000 | -3.04063700 | 1.55113900  |
| H | -2.99901000 | -2.87424700 | 2.39352000  |
| C | 0.17120500  | 4.20393400  | 0.27223600  |
| C | -0.34534500 | 2.92283200  | 0.17537200  |
| C | 0.06357200  | 1.81548500  | 0.97581200  |
| C | 1.08926700  | 2.14363400  | 1.91410800  |
| C | 1.62265400  | 3.42970000  | 2.02984500  |
| C | 1.17807100  | 4.47463800  | 1.21100800  |
| O | -0.44922200 | 0.62637500  | 0.83824100  |
| C | 0.23413300  | -1.26460300 | 3.59753500  |
| H | 0.68972900  | -2.09878300 | 4.14541700  |
| H | -0.85749400 | -1.32095400 | 3.74197300  |
| H | 0.58506300  | -0.32499900 | 4.05382700  |
| O | 0.60334400  | -1.37461500 | 2.23575800  |
| H | 0.22280200  | -0.59619000 | 1.73086000  |
| F | -1.33386300 | 2.69886300  | -0.76088200 |

|   |             |             |             |
|---|-------------|-------------|-------------|
| C | 2.42355700  | -0.94975200 | -1.13414300 |
| N | 3.65878200  | -1.10603400 | -0.60032600 |
| N | 2.06576100  | 0.22467500  | -1.68961600 |
| C | 2.85054000  | -3.14111900 | 0.55846900  |
| H | 3.18470700  | -4.11873500 | 0.92408800  |
| H | 2.31899000  | -2.61985500 | 1.36399500  |
| C | 1.90229500  | -3.30509400 | -0.62327900 |
| H | 0.95932000  | -3.76659200 | -0.32162500 |
| H | 2.34978500  | -3.92953700 | -1.41073000 |
| C | 4.06187800  | -2.33160800 | 0.10939700  |
| H | 4.71331000  | -2.92911400 | -0.54770800 |
| H | 4.65968100  | -2.02548200 | 0.97622600  |
| C | 4.64609600  | -0.03446800 | -0.75442600 |
| H | 5.44328200  | -0.21596100 | -0.02778900 |
| H | 5.09695700  | -0.07240900 | -1.75870900 |
| C | 3.96765200  | 1.30774300  | -0.50476300 |
| H | 4.67751900  | 2.13258700  | -0.62941500 |
| H | 3.59062300  | 1.34069500  | 0.52350900  |
| C | 2.81368800  | 1.48036700  | -1.48357900 |
| H | 3.17985900  | 1.81343500  | -2.46565200 |
| H | 2.11158700  | 2.23319900  | -1.10805600 |
| C | 0.76819800  | 0.36926400  | -2.36094200 |
| H | 0.56454000  | -0.49953600 | -2.99327800 |
| H | -0.03917800 | 0.50378700  | -1.63196200 |
| H | 0.82175500  | 1.25330600  | -3.00143300 |
| N | 1.56866800  | -1.98681500 | -1.17049200 |
| H | 0.57314500  | -1.79702800 | -1.27212100 |
| F | -0.31680100 | 5.16576527  | -0.53969426 |
| F | 1.53135623  | 1.15453410  | 2.71955104  |
| F | 2.57741316  | 3.66450279  | 2.95494100  |
| F | 1.68451160  | 5.72046463  | 1.32905007  |

*o*-FP/MTBD(a')\_Int2

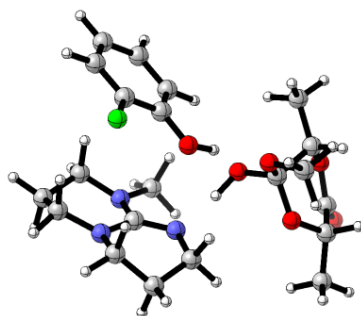

|   |            |             |             |
|---|------------|-------------|-------------|
| O | 1.66037827 | -1.90776036 | 0.89874642  |
| C | 1.96023227 | -0.73014536 | 0.15409342  |
| O | 1.13233627 | -0.59878736 | -0.90956358 |

|   |             |             |             |
|---|-------------|-------------|-------------|
| H | 2.72528127  | -5.00530236 | 1.57486942  |
| C | 1.98600327  | -4.20725136 | 1.46532842  |
| H | 1.22524927  | -4.53824936 | 0.75175942  |
| H | 1.51327527  | -4.01976236 | 2.43504642  |
| C | 2.65978327  | -2.93866236 | 0.97158242  |
| H | 3.44039527  | -2.63620836 | 1.69317642  |
| C | 3.42776827  | -0.73537936 | -0.32911558 |
| H | 4.08629727  | -0.67680636 | 0.54818942  |
| O | 3.70598827  | -1.98881836 | -1.00565358 |
| C | 3.36548527  | -3.13202036 | -0.37519658 |
| O | 3.63828127  | -4.20557136 | -0.85034358 |
| C | 3.75830427  | 0.38075964  | -1.30258258 |
| H | 3.12597327  | 0.30463364  | -2.19038458 |
| H | 3.59186827  | 1.35587864  | -0.83460458 |
| H | 4.80943427  | 0.30647664  | -1.59900358 |
| H | 0.17696327  | -0.79485536 | -0.65250858 |
| C | -1.07200600 | 5.61933900  | 0.07560300  |
| C | 0.17339600  | 5.01748100  | -0.02696100 |
| C | 0.35581900  | 3.63724200  | 0.15487100  |
| C | -0.77757600 | 2.86411900  | 0.44776000  |
| C | -2.03885300 | 3.45935300  | 0.55632000  |
| C | -2.19381000 | 4.83533700  | 0.37176100  |
| O | 1.60716100  | 3.13464200  | 0.04071200  |
| C | 2.24642527  | 0.35941464  | 2.35419642  |
| H | 1.88093627  | -0.51954036 | 2.89484542  |
| H | 1.88312727  | 1.26754964  | 2.84170542  |
| H | 3.34480827  | 0.37479164  | 2.36279942  |
| O | 1.71989127  | 0.39303564  | 1.02325742  |
| H | 1.61160300  | 2.17216400  | 0.21972800  |
| C | -2.40260550 | -1.21906873 | 0.00797865  |
| N | -3.42191629 | -2.17361938 | -0.15744936 |
| N | -1.14906340 | -1.47877918 | 0.17232281  |
| N | -2.79075657 | 0.12145698  | -0.12062267 |
| C | -1.66195927 | -3.84903349 | -0.45102625 |
| H | -1.37271833 | -4.88573624 | -0.23566271 |
| H | -1.66429584 | -3.72281678 | -1.54200729 |
| C | -0.68658716 | -2.85859241 | 0.19057818  |
| H | 0.28611207  | -2.90028793 | -0.31908900 |
| H | -0.49021719 | -3.15532105 | 1.23472548  |
| C | -3.06007303 | -3.56914799 | 0.08655186  |
| H | -3.10557843 | -3.80472700 | 1.16705152  |
| H | -3.80995846 | -4.19789322 | -0.41135987 |
| C | -4.80801593 | -1.85494433 | 0.17343335  |
| H | -5.44915464 | -2.59902535 | -0.31736417 |



|   |             |             |             |
|---|-------------|-------------|-------------|
| H | -4.98370346 | -1.95090712 | 1.26313260  |
| C | -5.16691406 | -0.44864680 | -0.28351254 |
| H | -6.17096331 | -0.18419317 | 0.06996712  |
| H | -5.16566777 | -0.40156355 | -1.37971375 |
| C | -4.13762957 | 0.52747289  | 0.26950713  |
| H | -4.23505127 | 0.59679678  | 1.37139911  |
| H | -4.31188096 | 1.53436370  | -0.12804380 |
| C | -1.75940139 | 1.12556867  | 0.11113831  |
| H | -0.85056298 | 0.85172395  | -0.42534482 |
| H | -2.12986795 | 2.08860982  | -0.25770515 |
| H | -1.50147135 | 1.22723200  | 1.17854903  |
| F | 1.25229779  | 5.77829951  | -0.30914199 |
| H | -0.65997386 | 1.80906259  | 0.58164690  |
| H | -2.88710762 | 2.84765933  | 0.78258303  |
| H | -3.15756328 | 5.29277020  | 0.45443195  |
| H | -1.14641024 | 6.67628909  | -0.07346250 |

*m*-FP/MTBD(b')\_Int2

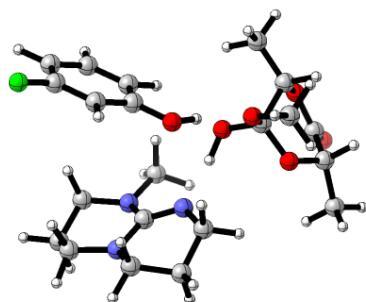

|   |            |             |             |
|---|------------|-------------|-------------|
| O | 1.66037827 | -1.90776036 | 0.89874642  |
| C | 1.96023227 | -0.73014536 | 0.15409342  |
| O | 1.13233627 | -0.59878736 | -0.90956358 |
| H | 2.72528127 | -5.00530236 | 1.57486942  |
| C | 1.98600327 | -4.20725136 | 1.46532842  |
| H | 1.22524927 | -4.53824936 | 0.75175942  |
| H | 1.51327527 | -4.01976236 | 2.43504642  |
| C | 2.65978327 | -2.93866236 | 0.97158242  |
| H | 3.44039527 | -2.63620836 | 1.69317642  |
| C | 3.42776827 | -0.73537936 | -0.32911558 |
| H | 4.08629727 | -0.67680636 | 0.54818942  |
| O | 3.70598827 | -1.98881836 | -1.00565358 |
| C | 3.36548527 | -3.13202036 | -0.37519658 |
| O | 3.63828127 | -4.20557136 | -0.85034358 |
| C | 3.75830427 | 0.38075964  | -1.30258258 |
| H | 3.12597327 | 0.30463364  | -2.19038458 |
| H | 3.59186827 | 1.35587864  | -0.83460458 |
| H | 4.80943427 | 0.30647664  | -1.59900358 |

|   |             |             |             |
|---|-------------|-------------|-------------|
| H | 0.17696327  | -0.79485536 | -0.65250858 |
| C | -1.07200600 | 5.61933900  | 0.07560300  |
| C | 0.17339600  | 5.01748100  | -0.02696100 |
| C | 0.35581900  | 3.63724200  | 0.15487100  |
| C | -0.77757600 | 2.86411900  | 0.44776000  |
| C | -2.03885300 | 3.45935300  | 0.55632000  |
| C | -2.19381000 | 4.83533700  | 0.37176100  |
| O | 1.60716100  | 3.13464200  | 0.04071200  |
| C | 2.24642527  | 0.35941464  | 2.35419642  |
| H | 1.88093627  | -0.51954036 | 2.89484542  |
| H | 1.88312727  | 1.26754964  | 2.84170542  |
| H | 3.34480827  | 0.37479164  | 2.36279942  |
| O | 1.71989127  | 0.39303564  | 1.02325742  |
| H | 1.61160300  | 2.17216400  | 0.21972800  |
| C | -2.40260550 | -1.21906873 | 0.00797865  |
| N | -3.42191629 | -2.17361938 | -0.15744936 |
| N | -1.14906340 | -1.47877918 | 0.17232281  |
| N | -2.79075657 | 0.12145698  | -0.12062267 |
| C | -1.66195927 | -3.84903349 | -0.45102625 |
| H | -1.37271833 | -4.88573624 | -0.23566271 |
| H | -1.66429584 | -3.72281678 | -1.54200729 |
| C | -0.68658716 | -2.85859241 | 0.19057818  |
| H | 0.28611207  | -2.90028793 | -0.31908900 |
| H | -0.49021719 | -3.15532105 | 1.23472548  |
| C | -3.06007303 | -3.56914799 | 0.08655186  |
| H | -3.10557843 | -3.80472700 | 1.16705152  |
| H | -3.80995846 | -4.19789322 | -0.41135987 |
| C | -4.80801593 | -1.85494433 | 0.17343335  |
| H | -5.44915464 | -2.59902535 | -0.31736417 |
| H | -4.98370346 | -1.95090712 | 1.26313260  |
| C | -5.16691406 | -0.44864680 | -0.28351254 |
| H | -6.17096331 | -0.18419317 | 0.06996712  |
| H | -5.16566777 | -0.40156355 | -1.37971375 |
| C | -4.13762957 | 0.52747289  | 0.26950713  |
| H | -4.23505127 | 0.59679678  | 1.37139911  |
| H | -4.31188096 | 1.53436370  | -0.12804380 |
| C | -1.75940139 | 1.12556867  | 0.11113831  |
| H | -0.85056298 | 0.85172395  | -0.42534482 |
| H | -2.12986795 | 2.08860982  | -0.25770515 |
| H | -1.50147135 | 1.22723200  | 1.17854903  |
| H | -0.65997386 | 1.80906259  | 0.58164690  |
| H | -2.88710762 | 2.84765933  | 0.78258303  |
| H | -3.15756328 | 5.29277020  | 0.45443195  |
| F | -1.16588051 | 6.95287416  | -0.11247029 |

|   |            |            |             |
|---|------------|------------|-------------|
| H | 1.02852557 | 5.62050012 | -0.25061556 |
|---|------------|------------|-------------|

*p*-FP/MTBD(c')\_Int2

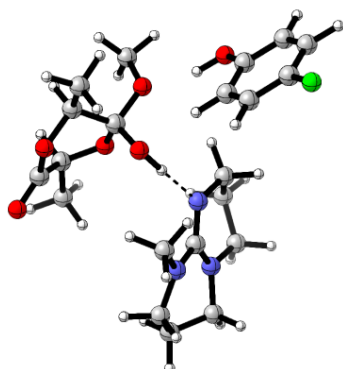

|   |             |             |             |
|---|-------------|-------------|-------------|
| O | 1.66037827  | -1.90776036 | 0.89874642  |
| C | 1.96023227  | -0.73014536 | 0.15409342  |
| O | 1.13233627  | -0.59878736 | -0.90956358 |
| H | 2.72528127  | -5.00530236 | 1.57486942  |
| C | 1.98600327  | -4.20725136 | 1.46532842  |
| H | 1.22524927  | -4.53824936 | 0.75175942  |
| H | 1.51327527  | -4.01976236 | 2.43504642  |
| C | 2.65978327  | -2.93866236 | 0.97158242  |
| H | 3.44039527  | -2.63620836 | 1.69317642  |
| C | 3.42776827  | -0.73537936 | -0.32911558 |
| H | 4.08629727  | -0.67680636 | 0.54818942  |
| O | 3.70598827  | -1.98881836 | -1.00565358 |
| C | 3.36548527  | -3.13202036 | -0.37519658 |
| O | 3.63828127  | -4.20557136 | -0.85034358 |
| C | 3.75830427  | 0.38075964  | -1.30258258 |
| H | 3.12597327  | 0.30463364  | -2.19038458 |
| H | 3.59186827  | 1.35587864  | -0.83460458 |
| H | 4.80943427  | 0.30647664  | -1.59900358 |
| H | 0.17696327  | -0.79485536 | -0.65250858 |
| C | -1.07200600 | 5.61933900  | 0.07560300  |
| C | 0.17339600  | 5.01748100  | -0.02696100 |
| C | 0.35581900  | 3.63724200  | 0.15487100  |
| C | -0.77757600 | 2.86411900  | 0.44776000  |
| C | -2.03885300 | 3.45935300  | 0.55632000  |
| C | -2.19381000 | 4.83533700  | 0.37176100  |
| H | -2.90087000 | 2.83773500  | 0.78625400  |
| O | 1.60716100  | 3.13464200  | 0.04071200  |
| C | 2.24642527  | 0.35941464  | 2.35419642  |
| H | 1.88093627  | -0.51954036 | 2.89484542  |
| H | 1.88312727  | 1.26754964  | 2.84170542  |
| H | 3.34480827  | 0.37479164  | 2.36279942  |

|   |             |             |             |
|---|-------------|-------------|-------------|
| O | 1.71989127  | 0.39303564  | 1.02325742  |
| H | 1.61160300  | 2.17216400  | 0.21972800  |
| H | -0.65804400 | 1.79174900  | 0.58384400  |
| C | -2.40260550 | -1.21906873 | 0.00797865  |
| N | -3.42191629 | -2.17361938 | -0.15744936 |
| N | -1.14906340 | -1.47877918 | 0.17232281  |
| N | -2.79075657 | 0.12145698  | -0.12062267 |
| C | -1.66195927 | -3.84903349 | -0.45102625 |
| H | -1.37271833 | -4.88573624 | -0.23566271 |
| H | -1.66429584 | -3.72281678 | -1.54200729 |
| C | -0.68658716 | -2.85859241 | 0.19057818  |
| H | 0.28611207  | -2.90028793 | -0.31908900 |
| H | -0.49021719 | -3.15532105 | 1.23472548  |
| C | -3.06007303 | -3.56914799 | 0.08655186  |
| H | -3.10557843 | -3.80472700 | 1.16705152  |
| H | -3.80995846 | -4.19789322 | -0.41135987 |
| C | -4.80801593 | -1.85494433 | 0.17343335  |
| H | -5.44915464 | -2.59902535 | -0.31736417 |
| H | -4.98370346 | -1.95090712 | 1.26313260  |
| C | -5.16691406 | -0.44864680 | -0.28351254 |
| H | -6.17096331 | -0.18419317 | 0.06996712  |
| H | -5.16566777 | -0.40156355 | -1.37971375 |
| C | -4.13762957 | 0.52747289  | 0.26950713  |
| H | -4.23505127 | 0.59679678  | 1.37139911  |
| H | -4.31188096 | 1.53436370  | -0.12804380 |
| C | -1.75940139 | 1.12556867  | 0.11113831  |
| H | -0.85056298 | 0.85172395  | -0.42534482 |
| H | -2.12986795 | 2.08860982  | -0.25770515 |
| H | -1.50147135 | 1.22723200  | 1.17854903  |
| H | 1.02852557  | 5.62050012  | -0.25061556 |
| H | -1.14641024 | 6.67628909  | -0.07346250 |
| F | -3.40976040 | 5.41247235  | 0.47606547  |

2,3-FP/MTBD(d')\_Int2

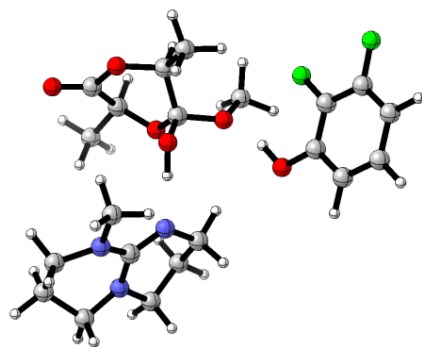

|   |            |            |            |
|---|------------|------------|------------|
| O | 1.39638200 | 1.93784100 | 0.94038200 |
|---|------------|------------|------------|

|   |             |             |             |
|---|-------------|-------------|-------------|
| C | 0.13382800  | 2.01569600  | 0.28469600  |
| O | -0.09352300 | 0.94384000  | -0.51171300 |
| H | 4.62083000  | 2.73793500  | 0.54103200  |
| C | 3.78032900  | 2.11234700  | 0.85406700  |
| H | 3.88530500  | 1.12779500  | 0.38863000  |
| H | 3.80338400  | 1.99541600  | 1.94233800  |
| C | 2.46707500  | 2.75478900  | 0.44133300  |
| H | 2.39237500  | 3.75728500  | 0.90227900  |
| C | 0.04842100  | 3.30803600  | -0.56018000 |
| H | 0.18904300  | 4.17524000  | 0.09956700  |
| O | 1.13651700  | 3.30162700  | -1.52146000 |
| C | 2.36894700  | 2.98699300  | -1.07100900 |
| O | 3.30915100  | 2.94921100  | -1.82561900 |
| C | -1.24098000 | 3.45089300  | -1.34607400 |
| H | -1.36587700 | 2.60079100  | -2.02146500 |
| H | -2.09539500 | 3.48850100  | -0.66307400 |
| H | -1.21578200 | 4.37490800  | -1.93252600 |
| H | 0.27379000  | 0.05759700  | -0.12599200 |
| C | -5.91366700 | -1.34373300 | 0.26007400  |
| C | -5.11635300 | -0.68952500 | 1.20122000  |
| C | -3.88516700 | -0.13412500 | 0.82332100  |
| C | -3.45297600 | -0.24034000 | -0.50740800 |
| C | -4.25159300 | -0.89277900 | -1.45276700 |
| C | -5.46694500 | -1.43304900 | -1.05369000 |
| O | -3.15243800 | 0.48970700  | 1.78923700  |
| C | -0.74617200 | 2.93596600  | 2.39704800  |
| H | 0.24269000  | 2.87223400  | 2.86289000  |
| H | -1.51323500 | 2.64784500  | 3.12030200  |
| H | -0.94148700 | 3.96655200  | 2.07022400  |
| O | -0.86189500 | 2.00526400  | 1.31509300  |
| H | -2.34633700 | 0.89585900  | 1.41713800  |
| C | 1.78449500  | -2.05520500 | -0.05888700 |
| N | 2.62108100  | -2.84101700 | 0.71752100  |
| N | 0.76760800  | -1.37410600 | 0.40413600  |
| N | 2.06055200  | -2.02237100 | -1.41056100 |
| C | 1.53264700  | -1.91006000 | 2.71075200  |
| H | 1.18817800  | -2.15966900 | 3.72188600  |
| H | 2.19089400  | -1.03474000 | 2.78476800  |
| C | 0.35510800  | -1.58864400 | 1.79138600  |
| H | -0.15973900 | -0.68390400 | 2.13328600  |
| H | -0.38800700 | -2.40202500 | 1.83905900  |
| C | 2.30464200  | -3.08643400 | 2.12461900  |
| H | 1.71553400  | -4.01444500 | 2.22829700  |
| H | 3.25053400  | -3.24245900 | 2.65991300  |

|   |             |             |             |
|---|-------------|-------------|-------------|
| C | 3.57068600  | -3.73848100 | 0.07233300  |
| H | 4.25245000  | -4.11417900 | 0.84327900  |
| H | 3.06458400  | -4.61307600 | -0.37396100 |
| C | 4.33178900  | -2.95486600 | -0.99076300 |
| H | 5.07123600  | -3.58681500 | -1.49620100 |
| H | 4.87115800  | -2.13500700 | -0.50082800 |
| C | 3.33779700  | -2.41018600 | -2.01392600 |
| H | 3.13043500  | -3.17483100 | -2.77919100 |
| H | 3.76875100  | -1.54447600 | -2.53982100 |
| C | 1.12411500  | -1.38907800 | -2.33175200 |
| H | 1.33207100  | -0.32042000 | -2.47500200 |
| H | 1.20289500  | -1.89536200 | -3.30163800 |
| H | 0.10570600  | -1.49499500 | -1.95517900 |
| H | -5.43785100 | -0.60045700 | 2.23525400  |
| H | -6.87008000 | -1.77830500 | 0.53664300  |
| F | -2.25935385 | 0.27756799  | -0.86732116 |
| F | -3.85593392 | -1.00584149 | -2.73852388 |
| H | -6.07682808 | -1.93321952 | -1.77671979 |

2,4-FP/MTBD(e')\_Int2

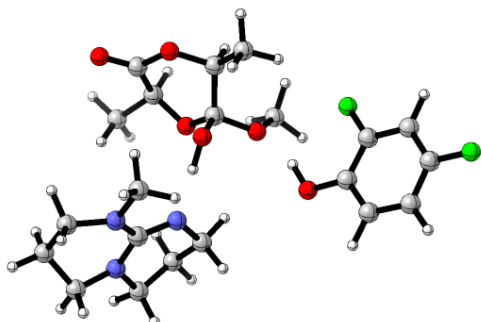

|   |             |            |             |
|---|-------------|------------|-------------|
| O | 1.39638200  | 1.93784100 | 0.94038200  |
| C | 0.13382800  | 2.01569600 | 0.28469600  |
| O | -0.09352300 | 0.94384000 | -0.51171300 |
| H | 4.62083000  | 2.73793500 | 0.54103200  |
| C | 3.78032900  | 2.11234700 | 0.85406700  |
| H | 3.88530500  | 1.12779500 | 0.38863000  |
| H | 3.80338400  | 1.99541600 | 1.94233800  |
| C | 2.46707500  | 2.75478900 | 0.44133300  |
| H | 2.39237500  | 3.75728500 | 0.90227900  |
| C | 0.04842100  | 3.30803600 | -0.56018000 |
| H | 0.18904300  | 4.17524000 | 0.09956700  |
| O | 1.13651700  | 3.30162700 | -1.52146000 |
| C | 2.36894700  | 2.98699300 | -1.07100900 |
| O | 3.30915100  | 2.94921100 | -1.82561900 |
| C | -1.24098000 | 3.45089300 | -1.34607400 |

|   |             |             |             |
|---|-------------|-------------|-------------|
| H | -1.36587700 | 2.60079100  | -2.02146500 |
| H | -2.09539500 | 3.48850100  | -0.66307400 |
| H | -1.21578200 | 4.37490800  | -1.93252600 |
| H | 0.27379000  | 0.05759700  | -0.12599200 |
| C | -5.91366700 | -1.34373300 | 0.26007400  |
| C | -5.11635300 | -0.68952500 | 1.20122000  |
| C | -3.88516700 | -0.13412500 | 0.82332100  |
| C | -3.45297600 | -0.24034000 | -0.50740800 |
| C | -4.25159300 | -0.89277900 | -1.45276700 |
| C | -5.46694500 | -1.43304900 | -1.05369000 |
| O | -3.15243800 | 0.48970700  | 1.78923700  |
| C | -0.74617200 | 2.93596600  | 2.39704800  |
| H | 0.24269000  | 2.87223400  | 2.86289000  |
| H | -1.51323500 | 2.64784500  | 3.12030200  |
| H | -0.94148700 | 3.96655200  | 2.07022400  |
| O | -0.86189500 | 2.00526400  | 1.31509300  |
| H | -2.34633700 | 0.89585900  | 1.41713800  |
| C | 1.78449500  | -2.05520500 | -0.05888700 |
| N | 2.62108100  | -2.84101700 | 0.71752100  |
| N | 0.76760800  | -1.37410600 | 0.40413600  |
| N | 2.06055200  | -2.02237100 | -1.41056100 |
| C | 1.53264700  | -1.91006000 | 2.71075200  |
| H | 1.18817800  | -2.15966900 | 3.72188600  |
| H | 2.19089400  | -1.03474000 | 2.78476800  |
| C | 0.35510800  | -1.58864400 | 1.79138600  |
| H | -0.15973900 | -0.68390400 | 2.13328600  |
| H | -0.38800700 | -2.40202500 | 1.83905900  |
| C | 2.30464200  | -3.08643400 | 2.12461900  |
| H | 1.71553400  | -4.01444500 | 2.22829700  |
| H | 3.25053400  | -3.24245900 | 2.65991300  |
| C | 3.57068600  | -3.73848100 | 0.07233300  |
| H | 4.25245000  | -4.11417900 | 0.84327900  |
| H | 3.06458400  | -4.61307600 | -0.37396100 |
| C | 4.33178900  | -2.95486600 | -0.99076300 |
| H | 5.07123600  | -3.58681500 | -1.49620100 |
| H | 4.87115800  | -2.13500700 | -0.50082800 |
| C | 3.33779700  | -2.41018600 | -2.01392600 |
| H | 3.13043500  | -3.17483100 | -2.77919100 |
| H | 3.76875100  | -1.54447600 | -2.53982100 |
| C | 1.12411500  | -1.38907800 | -2.33175200 |
| H | 1.33207100  | -0.32042000 | -2.47500200 |
| H | 1.20289500  | -1.89536200 | -3.30163800 |
| H | 0.10570600  | -1.49499500 | -1.95517900 |
| H | -5.43785100 | -0.60045700 | 2.23525400  |

|   |             |             |             |
|---|-------------|-------------|-------------|
| H | -6.87008000 | -1.77830500 | 0.53664300  |
| F | -2.25935385 | 0.27756799  | -0.86732116 |
| F | -6.23642365 | -2.06410526 | -1.96592385 |
| H | -3.93799654 | -0.98239149 | -2.47184838 |

2,6-FP/MTBD(f<sup>+</sup>)\_Int2

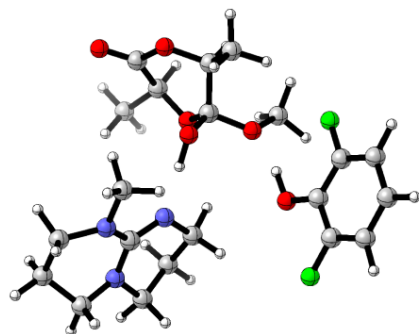

|   |             |             |             |
|---|-------------|-------------|-------------|
| O | 1.39638200  | 1.93784100  | 0.94038200  |
| C | 0.13382800  | 2.01569600  | 0.28469600  |
| O | -0.09352300 | 0.94384000  | -0.51171300 |
| H | 4.62083000  | 2.73793500  | 0.54103200  |
| C | 3.78032900  | 2.11234700  | 0.85406700  |
| H | 3.88530500  | 1.12779500  | 0.38863000  |
| H | 3.80338400  | 1.99541600  | 1.94233800  |
| C | 2.46707500  | 2.75478900  | 0.44133300  |
| H | 2.39237500  | 3.75728500  | 0.90227900  |
| C | 0.04842100  | 3.30803600  | -0.56018000 |
| H | 0.18904300  | 4.17524000  | 0.09956700  |
| O | 1.13651700  | 3.30162700  | -1.52146000 |
| C | 2.36894700  | 2.98699300  | -1.07100900 |
| O | 3.30915100  | 2.94921100  | -1.82561900 |
| C | -1.24098000 | 3.45089300  | -1.34607400 |
| H | -1.36587700 | 2.60079100  | -2.02146500 |
| H | -2.09539500 | 3.48850100  | -0.66307400 |
| H | -1.21578200 | 4.37490800  | -1.93252600 |
| H | 0.27379000  | 0.05759700  | -0.12599200 |
| C | -5.91366700 | -1.34373300 | 0.26007400  |
| C | -5.11635300 | -0.68952500 | 1.20122000  |
| C | -3.88516700 | -0.13412500 | 0.82332100  |
| C | -3.45297600 | -0.24034000 | -0.50740800 |
| C | -4.25159300 | -0.89277900 | -1.45276700 |
| C | -5.46694500 | -1.43304900 | -1.05369000 |
| O | -3.15243800 | 0.48970700  | 1.78923700  |
| C | -0.74617200 | 2.93596600  | 2.39704800  |
| H | 0.24269000  | 2.87223400  | 2.86289000  |
| H | -1.51323500 | 2.64784500  | 3.12030200  |



|   |             |             |             |
|---|-------------|-------------|-------------|
| H | -0.94148700 | 3.96655200  | 2.07022400  |
| O | -0.86189500 | 2.00526400  | 1.31509300  |
| H | -2.34633700 | 0.89585900  | 1.41713800  |
| C | 1.78449500  | -2.05520500 | -0.05888700 |
| N | 2.62108100  | -2.84101700 | 0.71752100  |
| N | 0.76760800  | -1.37410600 | 0.40413600  |
| N | 2.06055200  | -2.02237100 | -1.41056100 |
| C | 1.53264700  | -1.91006000 | 2.71075200  |
| H | 1.18817800  | -2.15966900 | 3.72188600  |
| H | 2.19089400  | -1.03474000 | 2.78476800  |
| C | 0.35510800  | -1.58864400 | 1.79138600  |
| H | -0.15973900 | -0.68390400 | 2.13328600  |
| H | -0.38800700 | -2.40202500 | 1.83905900  |
| C | 2.30464200  | -3.08643400 | 2.12461900  |
| H | 1.71553400  | -4.01444500 | 2.22829700  |
| H | 3.25053400  | -3.24245900 | 2.65991300  |
| C | 3.57068600  | -3.73848100 | 0.07233300  |
| H | 4.25245000  | -4.11417900 | 0.84327900  |
| H | 3.06458400  | -4.61307600 | -0.37396100 |
| C | 4.33178900  | -2.95486600 | -0.99076300 |
| H | 5.07123600  | -3.58681500 | -1.49620100 |
| H | 4.87115800  | -2.13500700 | -0.50082800 |
| C | 3.33779700  | -2.41018600 | -2.01392600 |
| H | 3.13043500  | -3.17483100 | -2.77919100 |
| H | 3.76875100  | -1.54447600 | -2.53982100 |
| C | 1.12411500  | -1.38907800 | -2.33175200 |
| H | 1.33207100  | -0.32042000 | -2.47500200 |
| H | 1.20289500  | -1.89536200 | -3.30163800 |
| H | 0.10570600  | -1.49499500 | -1.95517900 |
| H | -6.87008000 | -1.77830500 | 0.53664300  |
| F | -2.25935385 | 0.27756799  | -0.86732116 |
| H | -3.93799654 | -0.98239149 | -2.47184838 |
| F | -5.51581484 | -0.57885785 | 2.48600910  |
| H | -6.07682808 | -1.93321952 | -1.77671979 |

2,3,6-FP/MTBD(g')\_Int2

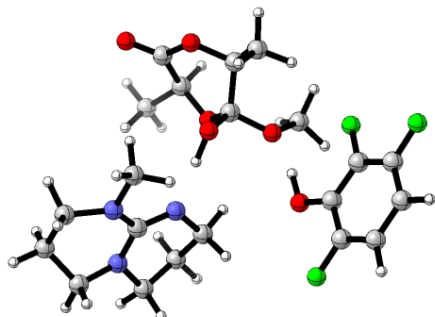

|   |             |             |             |
|---|-------------|-------------|-------------|
| O | 1.39638200  | 1.93784100  | 0.94038200  |
| C | 0.13382800  | 2.01569600  | 0.28469600  |
| O | -0.09352300 | 0.94384000  | -0.51171300 |
| H | 4.62083000  | 2.73793500  | 0.54103200  |
| C | 3.78032900  | 2.11234700  | 0.85406700  |
| H | 3.88530500  | 1.12779500  | 0.38863000  |
| H | 3.80338400  | 1.99541600  | 1.94233800  |
| C | 2.46707500  | 2.75478900  | 0.44133300  |
| H | 2.39237500  | 3.75728500  | 0.90227900  |
| C | 0.04842100  | 3.30803600  | -0.56018000 |
| H | 0.18904300  | 4.17524000  | 0.09956700  |
| O | 1.13651700  | 3.30162700  | -1.52146000 |
| C | 2.36894700  | 2.98699300  | -1.07100900 |
| O | 3.30915100  | 2.94921100  | -1.82561900 |
| C | -1.24098000 | 3.45089300  | -1.34607400 |
| H | -1.36587700 | 2.60079100  | -2.02146500 |
| H | -2.09539500 | 3.48850100  | -0.66307400 |
| H | -1.21578200 | 4.37490800  | -1.93252600 |
| H | 0.27379000  | 0.05759700  | -0.12599200 |
| C | -5.91366700 | -1.34373300 | 0.26007400  |
| C | -5.11635300 | -0.68952500 | 1.20122000  |
| C | -3.88516700 | -0.13412500 | 0.82332100  |
| C | -3.45297600 | -0.24034000 | -0.50740800 |
| C | -4.25159300 | -0.89277900 | -1.45276700 |
| C | -5.46694500 | -1.43304900 | -1.05369000 |
| O | -3.15243800 | 0.48970700  | 1.78923700  |
| C | -0.74617200 | 2.93596600  | 2.39704800  |
| H | 0.24269000  | 2.87223400  | 2.86289000  |
| H | -1.51323500 | 2.64784500  | 3.12030200  |
| H | -0.94148700 | 3.96655200  | 2.07022400  |
| O | -0.86189500 | 2.00526400  | 1.31509300  |
| H | -2.34633700 | 0.89585900  | 1.41713800  |
| C | 1.78449500  | -2.05520500 | -0.05888700 |
| N | 2.62108100  | -2.84101700 | 0.71752100  |
| N | 0.76760800  | -1.37410600 | 0.40413600  |
| N | 2.06055200  | -2.02237100 | -1.41056100 |
| C | 1.53264700  | -1.91006000 | 2.71075200  |
| H | 1.18817800  | -2.15966900 | 3.72188600  |
| H | 2.19089400  | -1.03474000 | 2.78476800  |
| C | 0.35510800  | -1.58864400 | 1.79138600  |
| H | -0.15973900 | -0.68390400 | 2.13328600  |
| H | -0.38800700 | -2.40202500 | 1.83905900  |
| C | 2.30464200  | -3.08643400 | 2.12461900  |
| H | 1.71553400  | -4.01444500 | 2.22829700  |

|   |             |             |             |
|---|-------------|-------------|-------------|
| H | 3.25053400  | -3.24245900 | 2.65991300  |
| C | 3.57068600  | -3.73848100 | 0.07233300  |
| H | 4.25245000  | -4.11417900 | 0.84327900  |
| H | 3.06458400  | -4.61307600 | -0.37396100 |
| C | 4.33178900  | -2.95486600 | -0.99076300 |
| H | 5.07123600  | -3.58681500 | -1.49620100 |
| H | 4.87115800  | -2.13500700 | -0.50082800 |
| C | 3.33779700  | -2.41018600 | -2.01392600 |
| H | 3.13043500  | -3.17483100 | -2.77919100 |
| H | 3.76875100  | -1.54447600 | -2.53982100 |
| C | 1.12411500  | -1.38907800 | -2.33175200 |
| H | 1.33207100  | -0.32042000 | -2.47500200 |
| H | 1.20289500  | -1.89536200 | -3.30163800 |
| H | 0.10570600  | -1.49499500 | -1.95517900 |
| H | -6.87008000 | -1.77830500 | 0.53664300  |
| F | -2.25935385 | 0.27756799  | -0.86732116 |
| F | -3.85593391 | -1.00584149 | -2.73852388 |
| F | -5.51581484 | -0.57885785 | 2.48600910  |
| H | -6.07682808 | -1.93321952 | -1.77671979 |

3,4,5-FP/MTBD(h')\_Int2

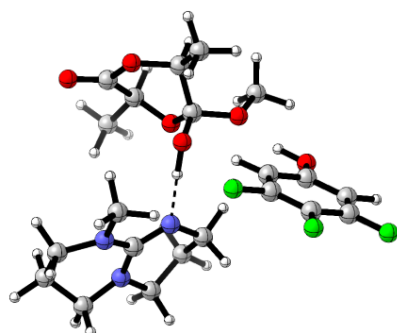

|   |             |            |             |
|---|-------------|------------|-------------|
| O | 1.39638200  | 1.93784100 | 0.94038200  |
| C | 0.13382800  | 2.01569600 | 0.28469600  |
| O | -0.09352300 | 0.94384000 | -0.51171300 |
| H | 4.62083000  | 2.73793500 | 0.54103200  |
| C | 3.78032900  | 2.11234700 | 0.85406700  |
| H | 3.88530500  | 1.12779500 | 0.38863000  |
| H | 3.80338400  | 1.99541600 | 1.94233800  |
| C | 2.46707500  | 2.75478900 | 0.44133300  |
| H | 2.39237500  | 3.75728500 | 0.90227900  |
| C | 0.04842100  | 3.30803600 | -0.56018000 |
| H | 0.18904300  | 4.17524000 | 0.09956700  |
| O | 1.13651700  | 3.30162700 | -1.52146000 |
| C | 2.36894700  | 2.98699300 | -1.07100900 |
| O | 3.30915100  | 2.94921100 | -1.82561900 |

|   |             |             |             |
|---|-------------|-------------|-------------|
| C | -1.24098000 | 3.45089300  | -1.34607400 |
| H | -1.36587700 | 2.60079100  | -2.02146500 |
| H | -2.09539500 | 3.48850100  | -0.66307400 |
| H | -1.21578200 | 4.37490800  | -1.93252600 |
| H | 0.27379000  | 0.05759700  | -0.12599200 |
| C | -5.91366700 | -1.34373300 | 0.26007400  |
| C | -5.11635300 | -0.68952500 | 1.20122000  |
| C | -3.88516700 | -0.13412500 | 0.82332100  |
| C | -3.45297600 | -0.24034000 | -0.50740800 |
| C | -4.25159300 | -0.89277900 | -1.45276700 |
| C | -5.46694500 | -1.43304900 | -1.05369000 |
| O | -3.15243800 | 0.48970700  | 1.78923700  |
| C | -0.74617200 | 2.93596600  | 2.39704800  |
| H | 0.24269000  | 2.87223400  | 2.86289000  |
| H | -1.51323500 | 2.64784500  | 3.12030200  |
| H | -0.94148700 | 3.96655200  | 2.07022400  |
| O | -0.86189500 | 2.00526400  | 1.31509300  |
| H | -2.34633700 | 0.89585900  | 1.41713800  |
| C | 1.78449500  | -2.05520500 | -0.05888700 |
| N | 2.62108100  | -2.84101700 | 0.71752100  |
| N | 0.76760800  | -1.37410600 | 0.40413600  |
| N | 2.06055200  | -2.02237100 | -1.41056100 |
| C | 1.53264700  | -1.91006000 | 2.71075200  |
| H | 1.18817800  | -2.15966900 | 3.72188600  |
| H | 2.19089400  | -1.03474000 | 2.78476800  |
| C | 0.35510800  | -1.58864400 | 1.79138600  |
| H | -0.15973900 | -0.68390400 | 2.13328600  |
| H | -0.38800700 | -2.40202500 | 1.83905900  |
| C | 2.30464200  | -3.08643400 | 2.12461900  |
| H | 1.71553400  | -4.01444500 | 2.22829700  |
| H | 3.25053400  | -3.24245900 | 2.65991300  |
| C | 3.57068600  | -3.73848100 | 0.07233300  |
| H | 4.25245000  | -4.11417900 | 0.84327900  |
| H | 3.06458400  | -4.61307600 | -0.37396100 |
| C | 4.33178900  | -2.95486600 | -0.99076300 |
| H | 5.07123600  | -3.58681500 | -1.49620100 |
| H | 4.87115800  | -2.13500700 | -0.50082800 |
| C | 3.33779700  | -2.41018600 | -2.01392600 |
| H | 3.13043500  | -3.17483100 | -2.77919100 |
| H | 3.76875100  | -1.54447600 | -2.53982100 |
| C | 1.12411500  | -1.38907800 | -2.33175200 |
| H | 1.33207100  | -0.32042000 | -2.47500200 |
| H | 1.20289500  | -1.89536200 | -3.30163800 |
| H | 0.10570600  | -1.49499500 | -1.95517900 |

|   |             |             |             |
|---|-------------|-------------|-------------|
| F | -6.23642365 | -2.06410526 | -1.96592385 |
| F | -3.85593391 | -1.00584149 | -2.73852388 |
| F | -7.10223909 | -1.88379273 | 0.60377718  |
| H | -5.43296349 | -0.60181104 | 2.21953432  |
| H | -2.50691993 | 0.17015004  | -0.79267250 |

2,3,5,6-FP/MTBD(I')\_Int2

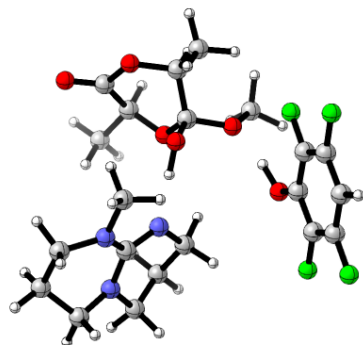

|   |             |             |             |
|---|-------------|-------------|-------------|
| O | 1.39638200  | 1.93784100  | 0.94038200  |
| C | 0.13382800  | 2.01569600  | 0.28469600  |
| O | -0.09352300 | 0.94384000  | -0.51171300 |
| H | 4.62083000  | 2.73793500  | 0.54103200  |
| C | 3.78032900  | 2.11234700  | 0.85406700  |
| H | 3.88530500  | 1.12779500  | 0.38863000  |
| H | 3.80338400  | 1.99541600  | 1.94233800  |
| C | 2.46707500  | 2.75478900  | 0.44133300  |
| H | 2.39237500  | 3.75728500  | 0.90227900  |
| C | 0.04842100  | 3.30803600  | -0.56018000 |
| H | 0.18904300  | 4.17524000  | 0.09956700  |
| O | 1.13651700  | 3.30162700  | -1.52146000 |
| C | 2.36894700  | 2.98699300  | -1.07100900 |
| O | 3.30915100  | 2.94921100  | -1.82561900 |
| C | -1.24098000 | 3.45089300  | -1.34607400 |
| H | -1.36587700 | 2.60079100  | -2.02146500 |
| H | -2.09539500 | 3.48850100  | -0.66307400 |
| H | -1.21578200 | 4.37490800  | -1.93252600 |
| H | 0.27379000  | 0.05759700  | -0.12599200 |
| C | -5.91366700 | -1.34373300 | 0.26007400  |
| C | -5.11635300 | -0.68952500 | 1.20122000  |
| C | -3.88516700 | -0.13412500 | 0.82332100  |
| C | -3.45297600 | -0.24034000 | -0.50740800 |
| C | -4.25159300 | -0.89277900 | -1.45276700 |
| C | -5.46694500 | -1.43304900 | -1.05369000 |
| O | -3.15243800 | 0.48970700  | 1.78923700  |
| C | -0.74617200 | 2.93596600  | 2.39704800  |
| H | 0.24269000  | 2.87223400  | 2.86289000  |

|   |             |             |             |
|---|-------------|-------------|-------------|
| H | -1.51323500 | 2.64784500  | 3.12030200  |
| H | -0.94148700 | 3.96655200  | 2.07022400  |
| O | -0.86189500 | 2.00526400  | 1.31509300  |
| H | -2.34633700 | 0.89585900  | 1.41713800  |
| C | 1.78449500  | -2.05520500 | -0.05888700 |
| N | 2.62108100  | -2.84101700 | 0.71752100  |
| N | 0.76760800  | -1.37410600 | 0.40413600  |
| N | 2.06055200  | -2.02237100 | -1.41056100 |
| C | 1.53264700  | -1.91006000 | 2.71075200  |
| H | 1.18817800  | -2.15966900 | 3.72188600  |
| H | 2.19089400  | -1.03474000 | 2.78476800  |
| C | 0.35510800  | -1.58864400 | 1.79138600  |
| H | -0.15973900 | -0.68390400 | 2.13328600  |
| H | -0.38800700 | -2.40202500 | 1.83905900  |
| C | 2.30464200  | -3.08643400 | 2.12461900  |
| H | 1.71553400  | -4.01444500 | 2.22829700  |
| H | 3.25053400  | -3.24245900 | 2.65991300  |
| C | 3.57068600  | -3.73848100 | 0.07233300  |
| H | 4.25245000  | -4.11417900 | 0.84327900  |
| H | 3.06458400  | -4.61307600 | -0.37396100 |
| C | 4.33178900  | -2.95486600 | -0.99076300 |
| H | 5.07123600  | -3.58681500 | -1.49620100 |
| H | 4.87115800  | -2.13500700 | -0.50082800 |
| C | 3.33779700  | -2.41018600 | -2.01392600 |
| H | 3.13043500  | -3.17483100 | -2.77919100 |
| H | 3.76875100  | -1.54447600 | -2.53982100 |
| C | 1.12411500  | -1.38907800 | -2.33175200 |
| H | 1.33207100  | -0.32042000 | -2.47500200 |
| H | 1.20289500  | -1.89536200 | -3.30163800 |
| H | 0.10570600  | -1.49499500 | -1.95517900 |
| F | -2.25935385 | 0.27756799  | -0.86732116 |
| F | -3.85593391 | -1.00584149 | -2.73852388 |
| F | -5.51581484 | -0.57885785 | 2.48600910  |
| H | -6.07682808 | -1.93321952 | -1.77671979 |
| F | -7.10223909 | -1.88379273 | 0.60377718  |

2,3,4,5,6-FP/MTBD(j')\_Int2

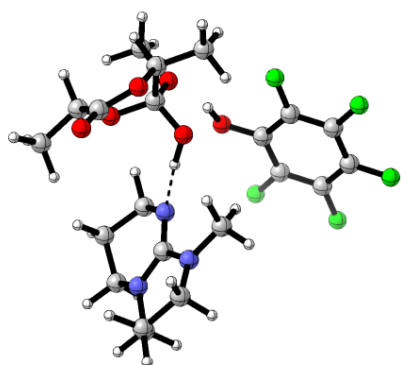

|   |             |             |             |
|---|-------------|-------------|-------------|
| O | 1.39638200  | 1.93784100  | 0.94038200  |
| C | 0.13382800  | 2.01569600  | 0.28469600  |
| O | -0.09352300 | 0.94384000  | -0.51171300 |
| H | 4.62083000  | 2.73793500  | 0.54103200  |
| C | 3.78032900  | 2.11234700  | 0.85406700  |
| H | 3.88530500  | 1.12779500  | 0.38863000  |
| H | 3.80338400  | 1.99541600  | 1.94233800  |
| C | 2.46707500  | 2.75478900  | 0.44133300  |
| H | 2.39237500  | 3.75728500  | 0.90227900  |
| C | 0.04842100  | 3.30803600  | -0.56018000 |
| H | 0.18904300  | 4.17524000  | 0.09956700  |
| O | 1.13651700  | 3.30162700  | -1.52146000 |
| C | 2.36894700  | 2.98699300  | -1.07100900 |
| O | 3.30915100  | 2.94921100  | -1.82561900 |
| C | -1.24098000 | 3.45089300  | -1.34607400 |
| H | -1.36587700 | 2.60079100  | -2.02146500 |
| H | -2.09539500 | 3.48850100  | -0.66307400 |
| H | -1.21578200 | 4.37490800  | -1.93252600 |
| H | 0.27379000  | 0.05759700  | -0.12599200 |
| C | -5.91366700 | -1.34373300 | 0.26007400  |
| C | -5.11635300 | -0.68952500 | 1.20122000  |
| C | -3.88516700 | -0.13412500 | 0.82332100  |
| C | -3.45297600 | -0.24034000 | -0.50740800 |
| C | -4.25159300 | -0.89277900 | -1.45276700 |
| C | -5.46694500 | -1.43304900 | -1.05369000 |
| O | -3.15243800 | 0.48970700  | 1.78923700  |
| C | -0.74617200 | 2.93596600  | 2.39704800  |
| H | 0.24269000  | 2.87223400  | 2.86289000  |
| H | -1.51323500 | 2.64784500  | 3.12030200  |
| H | -0.94148700 | 3.96655200  | 2.07022400  |
| O | -0.86189500 | 2.00526400  | 1.31509300  |
| H | -2.34633700 | 0.89585900  | 1.41713800  |
| C | 1.78449500  | -2.05520500 | -0.05888700 |
| N | 2.62108100  | -2.84101700 | 0.71752100  |
| N | 0.76760800  | -1.37410600 | 0.40413600  |

|   |             |             |             |
|---|-------------|-------------|-------------|
| N | 2.06055200  | -2.02237100 | -1.41056100 |
| C | 1.53264700  | -1.91006000 | 2.71075200  |
| H | 1.18817800  | -2.15966900 | 3.72188600  |
| H | 2.19089400  | -1.03474000 | 2.78476800  |
| C | 0.35510800  | -1.58864400 | 1.79138600  |
| H | -0.15973900 | -0.68390400 | 2.13328600  |
| H | -0.38800700 | -2.40202500 | 1.83905900  |
| C | 2.30464200  | -3.08643400 | 2.12461900  |
| H | 1.71553400  | -4.01444500 | 2.22829700  |
| H | 3.25053400  | -3.24245900 | 2.65991300  |
| C | 3.57068600  | -3.73848100 | 0.07233300  |
| H | 4.25245000  | -4.11417900 | 0.84327900  |
| H | 3.06458400  | -4.61307600 | -0.37396100 |
| C | 4.33178900  | -2.95486600 | -0.99076300 |
| H | 5.07123600  | -3.58681500 | -1.49620100 |
| H | 4.87115800  | -2.13500700 | -0.50082800 |
| C | 3.33779700  | -2.41018600 | -2.01392600 |
| H | 3.13043500  | -3.17483100 | -2.77919100 |
| H | 3.76875100  | -1.54447600 | -2.53982100 |
| C | 1.12411500  | -1.38907800 | -2.33175200 |
| H | 1.33207100  | -0.32042000 | -2.47500200 |
| H | 1.20289500  | -1.89536200 | -3.30163800 |
| H | 0.10570600  | -1.49499500 | -1.95517900 |
| F | -2.25935385 | 0.27756799  | -0.86732116 |
| F | -3.85593391 | -1.00584149 | -2.73852388 |
| F | -5.51581484 | -0.57885785 | 2.48600910  |
| F | -7.10223909 | -1.88379273 | 0.60377718  |
| F | -6.23642365 | -2.06410526 | -1.96592385 |

## Reference

1. Gaussian 16, Revision C.01, M. J. Frisch, G. W. Trucks, H. B. Schlegel, G. E. Scuseria, M. A. Robb, J. R. Cheeseman, G. Scalmani, V. Barone, G. A. Petersson, H. Nakatsuji, X. Li, M. Caricato, A. V. Marenich, J. Bloino, B. G. Janesko, R. Gomperts, B. Mennucci, H. P. Hratchian, J. V. Ortiz, A. F. Izmaylov, J. L. Sonnenberg, D. Williams-Young, F. Ding, F. Lipparini, F. Egidi, J. Goings, B. Peng, A. Petrone, T. Henderson, D. Ranasinghe, V. G. Zakrzewski, J. Gao, N. Rega, G. Zheng, W. Liang, M. Hada, M. Ehara, K. Toyota, R. Fukuda, J. Hasegawa, M. Ishida, T. Nakajima, Y. Honda, O. Kitao, H. Nakai, T. Vreven, K. Throssell, J. A. Montgomery, Jr., J. E. Peralta, F. Ogliaro, M. J. Bearpark, J. J. Heyd, E. N. Brothers, K. N. Kudin, V. N. Staroverov, T. A. Keith, R. Kobayashi, J. Normand, K. Raghavachari, A. P. Rendell, J. C. Burant, S. S. Iyengar, J. Tomasi, M. Cossi, J. M. Millam, M. Klene, C. Adamo, R. Cammi, J. W. Ochterski, R. L. Martin, K. Morokuma, O. Farkas, J. B. Foresman, and D. J. Fox, Gaussian, Inc., Wallingford CT, 2019.
2. Orhan, B.; Tschan, M. J. L.; Wirotius, A.-L.; Dove, A. P.; Coulembier, O.; Taton, D., Isolelective Ring-Opening Polymerization of rac-Lactide from Chiral Takemoto's Organocatalysts: Elucidation of Stereocontrol. *ACS Macro Letters* **2018**, *7* (12), 1413-1419.
